# Supplementary material for: Trichostatin A-Mediated Epigenetic Modulation Predominantly Triggers Transcriptomic Alterations in the Ex Vivo Expanded Equine Chondrocytes
Source: Int J Mol Sci. 2022 Oct 29;23(21):13168. doi: 10.3390/ijms232113168 (PMC9655705; doi:10.3390/ijms232113168)
Supplement: Supplementary file 1 [file ijms-23-13168-s001.zip › Supplementary Tables.xlsx]

## Sheet: Table S1
Table S1. Results of the identification of DEGs between group I vs II using DeSeq 2 software.								Group I (5-AZA-dc)				Group II (5-AZA-dc+TSA)
	gene	baseMean	log2FoldChange	lfcSE	stat	pvalue	padj	a1count	a2count	a3count	a4count	z5count	z6count	z7count	z8count
1	ENSECAG00000038313	2620.25	-4.26731	0.213215	-20.0141	4.15068e-89	3.96888e-85	245.53	200.332	346.477	242.016	4166.94	4133.7	6138.86	5488.11
2	ENSECAG00000015180	1066.11	4.78657	0.242925	19.7039	1.99692e-86	9.54727e-83	1369.01	2252.09	2029.86	2579.56	59.9135	98.4666	61.8303	78.139
3	ENSECAG00000005525	490.506	3.1333	0.171946	18.2226	3.41815e-74	1.08948e-70	834.553	935.976	792.684	957.372	82.6975	92.7858	101.578	126.401
4	ENSECAG00000001555	682.869	-8.1303	0.450101	-18.0633	6.20088e-73	1.48232e-69	0	7.38928	6.01821	4.85976	676.769	1290.48	1798.6	1678.84
5	ENSECAG00000020399	350.913	3.89085	0.224553	17.3271	2.93782e-67	5.61828e-64	600.184	643.689	756.575	628.853	39.6611	46.3929	27.6028	64.3497
6	ENSECAG00000028889	14980.7	-7.10619	0.420167	-16.9128	3.62216e-64	5.77252e-61	199.648	114.123	300.051	249.792	12152.3	15617.4	51103.8	40108.3
7	ENSECAG00000021968	273.527	-3.57302	0.218285	-16.3686	3.20306e-60	4.37538e-57	62.0024	28.7361	47.286	34.0183	491.122	492.333	515.62	517.096
8	ENSECAG00000008539	356.812	5.7434	0.355825	16.1411	1.31246e-58	1.56872e-55	1155.73	550.091	643.089	452.929	9.28237	15.1487	12.1452	16.0874
9	ENSECAG00000025161	473.628	3.16164	0.2012	15.7139	1.21537e-55	1.29126e-52	885.395	717.582	1064.36	739.655	74.259	101.307	93.8495	112.612
10	ENSECAG00000014760	808.596	1.90423	0.122439	15.5525	1.53049e-54	1.46346e-51	1181.77	1321.04	1388.49	1212.02	319.82	337.059	348.899	359.669
11	ENSECAG00000003345	4959.61	1.94391	0.129018	15.0669	2.67229e-51	2.32295e-48	7324.97	7763.67	8973.15	7428.62	1870.82	2146.38	1910.11	2259.14
12	ENSECAG00000024371	257.017	2.44938	0.163462	14.9844	9.28239e-51	7.39652e-48	437.737	487.693	420.415	391.696	72.5713	87.105	76.1837	82.7354
13	ENSECAG00000010468	452.618	-2.36582	0.15875	-14.9028	3.15948e-50	2.32392e-47	125.245	140.396	159.912	161.344	647.235	814.243	831.397	741.171
14	ENSECAG00000016927	801.166	3.68934	0.256115	14.405	4.81391e-47	3.2879e-44	2027.48	851.41	1563.02	1506.52	115.608	119.296	93.8495	132.147
15	ENSECAG00000001963	331.971	3.44077	0.239068	14.3924	5.77379e-47	3.6806e-44	458.818	598.532	678.338	694.945	42.1926	60.5948	43.0604	79.2881
16	ENSECAG00000013913	157.671	2.77034	0.193924	14.2857	2.68801e-46	1.60642e-43	274.051	275.046	275.118	276.034	34.5979	52.0737	34.2275	40.2186
17	ENSECAG00000000477	161.312	2.97634	0.214008	13.9076	5.69543e-44	3.20351e-41	269.091	342.37	273.399	260.483	43.8803	31.2442	29.811	40.2186
18	ENSECAG00000020532	628.872	1.7405	0.126114	13.8009	2.51539e-43	1.33623e-40	942.437	1072.27	892.415	965.148	298.724	290.666	269.403	299.916
19	ENSECAG00000010051	112.717	3.46676	0.25134	13.7931	2.80424e-43	1.41127e-40	224.449	169.954	238.149	194.39	18.5647	18.9359	15.4576	21.8329
20	ENSECAG00000033446	76.8845	-4.32709	0.322064	-13.4355	3.7451e-41	1.79053e-38	4.96019	8.21032	9.45719	5.83171	158.644	138.232	136.91	152.831
21	ENSECAG00000002142	185.896	3.40734	0.253973	13.4162	4.86187e-41	2.21377e-38	271.571	426.936	307.789	352.818	27.0033	44.4993	22.0822	34.4731
22	ENSECAG00000010336	1210.16	2.46414	0.184651	13.3448	1.26928e-40	5.51675e-38	1550.06	2534.52	1996.33	2113.99	310.538	418.483	393.064	364.265
23	ENSECAG00000014841	333.331	-2.78984	0.211074	-13.2173	6.97186e-40	2.89848e-37	75.643	69.7877	102.31	88.4476	480.996	479.078	688.966	681.418
24	ENSECAG00000020731	294.51	4.49462	0.34281	13.1111	2.84371e-39	1.13298e-36	551.822	316.097	885.537	501.527	17.7209	17.9891	30.9151	34.4731
25	ENSECAG00000000857	122.975	3.45543	0.263663	13.1055	3.06301e-39	1.17154e-36	280.251	226.605	208.918	186.615	19.4086	29.3506	16.5617	16.0874
26	ENSECAG00000011829	1696.25	3.08739	0.23699	13.0275	8.53565e-39	3.13915e-36	3997.92	1936.81	3448.44	2757.43	302.943	306.761	385.335	434.361
27	ENSECAG00000019861	4885.37	2.11668	0.163458	12.9494	2.36773e-38	8.38527e-36	7032.32	7161.86	8971.43	8593.02	1454.8	2049.81	2055.86	1763.87
28	ENSECAG00000022254	1031.48	3.13186	0.247985	12.6292	1.45722e-36	4.9764e-34	1175.57	2591.18	1473.6	2166.48	234.591	187.465	223.031	199.944
29	ENSECAG00000000725	198.808	2.33699	0.188391	12.405	2.45464e-35	8.09355e-33	358.374	339.086	284.575	345.043	59.9135	64.382	55.2056	83.8845
30	ENSECAG00000015128	331.556	2.12459	0.174967	12.1428	6.26465e-34	1.99675e-31	518.34	496.724	613.858	529.713	123.202	155.274	101.578	113.761
31	ENSECAG00000006881	3517.03	2.14096	0.177714	12.0472	2.0057e-33	6.13459e-31	6469.33	5599.44	6282.15	4584.69	1044.69	1572.62	1209	1374.33
32	ENSECAG00000013276	205.96	-2.19105	0.181901	-12.0453	2.05299e-33	6.13459e-31	85.5634	67.3246	73.0783	70.9525	310.538	293.506	399.689	347.029
33	ENSECAG00000020305	707.17	1.69022	0.141773	11.9221	9.08268e-33	2.63178e-30	1222.69	1073.09	928.524	1095.39	340.916	333.271	299.214	364.265
34	ENSECAG00000013582	93.6601	3.96877	0.337918	11.7448	7.51137e-32	2.11246e-29	115.325	183.911	234.71	171.063	16.0332	11.3615	8.8329	8.04372
35	ENSECAG00000018309	237.962	2.13039	0.182313	11.6853	1.51459e-31	4.13786e-29	486.099	356.328	349.916	357.678	89.4483	80.4775	87.2249	96.5246
36	ENSECAG00000020753	87.4901	4.19391	0.360646	11.6289	2.9387e-31	7.80551e-29	100.444	200.332	167.65	194.39	6.75082	6.62756	9.93701	13.7892
37	ENSECAG00000020519	77.8805	2.69137	0.235117	11.4469	2.4365e-30	6.29671e-28	128.965	134.649	134.98	140.933	22.784	18.9359	17.6658	24.1312
38	ENSECAG00000024636	67.6163	-5.43564	0.478153	-11.368	6.03582e-30	1.5188e-27	1.24005	4.92619	1.71949	3.88781	140.079	175.157	108.203	105.717
39	ENSECAG00000017863	146.518	3.45949	0.304481	11.362	6.46832e-30	1.5859e-27	207.088	209.363	373.989	282.838	13.5016	24.6166	32.0193	28.7276
40	ENSECAG00000016339	126.751	-2.55238	0.225617	-11.3129	1.13266e-29	2.70763e-27	39.6816	33.6623	36.969	37.9061	264.126	163.795	224.135	213.733
41	ENSECAG00000014009	1671.03	2.72007	0.24184	11.2474	2.38548e-29	5.43093e-27	2426.78	2688.88	3101.1	3390.17	320.664	679.798	391.96	368.862
42	ENSECAG00000017419	259.463	2.08708	0.185556	11.2477	2.3768e-29	5.43093e-27	441.457	467.167	353.355	416.967	77.6344	101.307	97.1619	120.656
43	ENSECAG00000013583	274.534	-2.57966	0.231115	-11.1618	6.27033e-29	1.39435e-26	74.4029	72.2508	91.9927	75.8122	562.849	324.75	586.284	407.931
44	ENSECAG00000019193	98.8041	-4.79788	0.429994	-11.158	6.54318e-29	1.42195e-26	1.24005	14.7786	5.15847	4.85976	123.202	236.698	168.929	235.566
45	ENSECAG00000017191	153.9	-6.72678	0.606143	-11.0977	1.28736e-28	2.7355e-26	3.72015	3.28413	0.859745	3.88781	84.3852	464.876	247.321	422.87
46	ENSECAG00000016064	62.6125	3.07893	0.279279	11.0246	2.90851e-28	6.04591e-26	101.684	107.555	127.242	110.802	11.8139	11.3615	14.3535	16.0874
47	ENSECAG00000009068	352.144	1.45708	0.132539	10.9936	4.10101e-28	8.34337e-26	472.459	549.27	513.268	528.742	174.677	190.306	196.532	191.9
48	ENSECAG00000009763	165.384	-1.98237	0.181195	-10.9405	7.37849e-28	1.4501e-25	80.6032	64.8615	65.3406	57.3451	230.372	262.262	272.716	289.574
49	ENSECAG00000013359	92.8773	2.57211	0.235113	10.9399	7.43096e-28	1.4501e-25	164.926	137.933	166.79	166.204	25.3156	27.457	18.7699	35.6222
50	ENSECAG00000013425	288.823	1.6545	0.152012	10.884	1.37472e-27	2.62902e-25	448.898	395.737	443.628	466.537	160.332	131.604	123.661	140.191
51	ENSECAG00000011347	223.846	1.89072	0.173925	10.8709	1.58614e-27	2.97385e-25	307.532	323.486	383.446	394.612	86.0729	86.1583	104.891	104.568
52	ENSECAG00000012231	850.574	1.68502	0.15518	10.8585	1.81802e-27	3.34307e-25	1189.21	1514.8	1164.95	1320.88	397.454	417.536	338.962	460.79
53	ENSECAG00000040088	374.39	1.59811	0.14774	10.817	2.85851e-27	5.15719e-25	567.942	541.881	595.803	545.265	167.083	204.508	161.2	211.435
54	ENSECAG00000006877	959.752	-1.54953	0.143294	-10.8136	2.96736e-27	5.25442e-25	422.857	573.08	472	485.004	1432.86	1449.54	1274.15	1568.52
55	ENSECAG00000028292	1519.48	-2.97023	0.274839	-10.8072	3.1837e-27	5.53501e-25	533.221	367.822	244.167	232.296	1977.99	2537.41	3207.45	3055.46
56	ENSECAG00000023911	399.458	-1.59458	0.147582	-10.8047	3.26997e-27	5.58347e-25	200.888	175.701	221.814	196.334	569.6	534.939	643.697	652.69
57	ENSECAG00000011735	4332.23	1.23315	0.114178	10.8003	3.43216e-27	5.75761e-25	6610.7	5853.95	6221.11	5630.51	2781.34	2562.02	2350.66	2647.53
58	ENSECAG00000000514	90.7359	-4.5278	0.419455	-10.7945	3.65529e-27	6.02618e-25	3.72015	4.10516	11.1767	10.6915	129.953	107.935	258.362	199.944
59	ENSECAG00000024764	56.3389	-5.70453	0.529238	-10.7788	4.33667e-27	7.02834e-25	0	2.46309	2.57923	2.91585	124.89	98.4666	114.828	104.568
60	ENSECAG00000022186	54.2125	-5.33607	0.499381	-10.6854	1.19182e-26	1.89936e-24	3.72015	1.64206	4.29872	0.971951	103.794	80.4775	118.14	120.656
61	ENSECAG00000018235	124.132	2.90538	0.272195	10.6739	1.34876e-26	2.11424e-24	215.768	241.383	202.9	214.801	13.5016	36.925	28.7069	39.0695
62	ENSECAG00000032801	187.627	-1.76329	0.165973	-10.6239	2.30708e-26	3.55811e-24	94.2437	89.4924	73.938	84.5598	279.315	274.57	326.817	278.083
63	ENSECAG00000018435	531.377	2.17005	0.20443	10.6151	2.53484e-26	3.84733e-24	693.187	1098.54	825.355	859.205	142.611	196.933	205.365	229.821
64	ENSECAG00000008439	709.271	1.51462	0.142978	10.5934	3.19722e-26	4.77685e-24	930.037	1211.02	1023.96	1037.07	329.102	409.015	374.294	359.669
65	ENSECAG00000037526	340.493	-1.78758	0.169089	-10.5718	4.02606e-26	5.92265e-24	150.046	165.848	144.437	150.652	411.8	549.141	548.744	603.279
66	ENSECAG00000002087	689.354	-1.10415	0.104715	-10.5444	5.39093e-26	7.81031e-24	434.017	432.684	441.909	442.238	932.457	954.368	970.515	906.642
67	ENSECAG00000015379	78.652	3.20876	0.305244	10.5121	7.59549e-26	1.084e-23	89.2835	145.323	158.193	174.951	16.0332	16.0955	13.2493	16.0874
68	ENSECAG00000011541	203.311	-1.85109	0.177104	-10.452	1.43477e-25	1.99523e-23	112.844	72.2508	87.6939	82.6159	343.448	309.602	314.672	303.363
69	ENSECAG00000018674	2184.27	2.36509	0.226289	10.4517	1.43977e-25	1.99523e-23	2792.59	3096.11	4502.48	4243.54	773.812	918.39	525.557	621.664
70	ENSECAG00000018986	451.781	1.36513	0.130803	10.4365	1.68949e-25	2.30785e-23	669.626	584.574	687.796	660.927	244.717	234.805	259.466	272.337
71	ENSECAG00000003121	1470.88	1.57328	0.152305	10.3298	5.16507e-25	6.95611e-23	2082.04	2119.9	2396.11	2207.3	671.706	611.629	886.602	791.732
72	ENSECAG00000017458	133.562	3.55438	0.344387	10.3209	5.66923e-25	7.52905e-23	243.05	403.126	166.79	171.063	17.7209	17.0423	20.9781	28.7276
73	ENSECAG00000033359	92.4197	-4.2977	0.416841	-10.3102	6.33843e-25	8.30248e-23	4.96019	4.92619	13.7559	11.6634	85.2291	187.465	242.905	188.453
74	ENSECAG00000008559	178.482	-2.21412	0.214809	-10.3074	6.52243e-25	8.42804e-23	47.1219	57.4722	70.4991	76.7842	252.312	255.634	356.628	311.407
75	ENSECAG00000014780	226.616	2.50571	0.243637	10.2846	8.26858e-25	1.04032e-22	527.021	249.594	414.397	350.874	66.6643	68.1692	69.5591	66.6479
76	ENSECAG00000016973	195.694	2.20333	0.214223	10.2852	8.21396e-25	1.04032e-22	308.772	313.634	317.246	346.015	74.259	54.9141	51.8933	98.8228
77	ENSECAG00000017157	105.54	-3.31854	0.322962	-10.2753	9.10625e-25	1.13083e-22	24.801	23.8099	7.7377	21.3829	256.531	142.966	184.387	182.707
78	ENSECAG00000021781	150.947	1.9009	0.186428	10.1964	2.05684e-24	2.52147e-22	235.609	266.835	251.905	198.278	62.4451	71.0095	64.0385	57.4551
79	ENSECAG00000008767	176.559	-1.90566	0.188452	-10.1122	4.87861e-24	5.90498e-22	53.3221	68.9667	84.255	89.4195	271.72	268.889	277.132	298.767
80	ENSECAG00000012512	689.004	-1.23057	0.121953	-10.0905	6.08278e-24	7.27044e-22	434.017	428.578	414.397	370.313	940.895	1004.55	895.435	1023.85
81	ENSECAG00000018455	1420.59	2.1547	0.216001	9.97542	1.95265e-23	2.30509e-21	2233.33	1992.64	2837.16	2217.02	426.145	653.288	374.294	630.857
82	ENSECAG00000010059	132.606	2.65038	0.266914	9.92973	3.09085e-23	3.60424e-21	321.173	219.215	221.814	153.568	37.1295	42.6057	32.0193	33.324
83	ENSECAG00000011816	347.963	1.78868	0.180182	9.92709	3.17382e-23	3.65639e-21	581.583	522.176	582.047	472.368	117.295	188.412	160.096	159.725
84	ENSECAG00000037409	259.628	-1.54649	0.156038	-9.911	3.72905e-23	4.24491e-21	132.685	133.828	133.26	129.27	341.76	350.314	427.291	428.615
85	ENSECAG00000019588	52.6233	4.96349	0.503348	9.86096	6.14588e-23	6.91375e-21	76.883	77.998	150.455	102.055	2.53156	0.946794	5.52056	4.59641
86	ENSECAG00000017123	846.987	1.37769	0.141416	9.74211	1.99374e-22	2.21676e-20	1125.96	1433.52	1188.17	1143.99	440.491	484.759	435.02	523.991
87	ENSECAG00000024053	216.19	-1.74089	0.179364	-9.70591	2.84516e-22	3.12707e-20	88.0435	120.692	94.5719	93.3073	280.159	330.431	350.004	372.309
88	ENSECAG00000017249	212.779	2.49352	0.257199	9.69492	3.169e-22	3.4434e-20	312.492	310.35	495.213	326.576	66.6643	40.7121	64.0385	86.1827
89	ENSECAG00000020616	387.41	-1.41391	0.147074	-9.61361	7.00514e-22	7.5262e-20	193.448	249.594	213.217	187.587	523.188	571.864	597.325	563.06
90	ENSECAG00000017837	47.1715	-4.33425	0.451517	-9.59931	8.04802e-22	8.55058e-20	1.24005	6.56825	1.71949	7.77561	102.106	82.3711	61.8303	113.761
91	ENSECAG00000017058	125.821	-1.73512	0.180973	-9.58775	9.00307e-22	9.46015e-20	62.0024	49.2619	64.4808	57.3451	194.086	195.986	178.866	204.54
92	ENSECAG00000006670	348.853	2.19059	0.229147	9.55974	1.1805e-21	1.22695e-19	755.19	481.124	539.06	515.134	115.608	175.157	102.682	106.867
93	ENSECAG00000024265	501.55	1.70591	0.178564	9.55349	1.25403e-21	1.28935e-19	569.182	878.504	858.885	762.982	206.744	247.113	238.488	250.504
94	ENSECAG00000014821	455.753	-1.39215	0.145819	-9.54713	1.33337e-21	1.35635e-19	270.331	230.71	256.204	249.792	734.995	569.023	712.152	622.814
95	ENSECAG00000007589	126.981	2.74358	0.287406	9.546	1.34796e-21	1.35676e-19	199.648	148.607	324.983	209.941	28.691	27.457	39.748	36.7713
96	ENSECAG00000009648	330.3	2.01949	0.211851	9.53257	1.53432e-21	1.52824e-19	699.387	436.789	431.592	552.068	134.172	111.722	119.244	157.427
97	ENSECAG00000007530	74.612	2.77843	0.292128	9.51102	1.88801e-21	1.86115e-19	126.485	95.2397	159.053	139.961	21.9402	11.3615	19.874	22.9821
98	ENSECAG00000008134	325.205	2.05439	0.216469	9.49043	2.30079e-21	2.24492e-19	474.939	467.988	653.406	498.611	100.418	98.4666	144.639	163.173
99	ENSECAG00000041291	91.6015	2.13849	0.225523	9.48235	2.48625e-21	2.40137e-19	146.326	138.754	165.071	146.765	38.8172	22.7231	36.4357	37.9204
100	ENSECAG00000008303	430.569	1.66513	0.177657	9.37269	7.07083e-21	6.76113e-19	776.271	585.395	606.98	651.207	242.186	177.05	173.346	232.119
101	ENSECAG00000007972	216.405	3.41661	0.364809	9.36546	7.57168e-21	7.16836e-19	239.329	589.501	304.35	450.013	24.4717	66.2756	32.0193	25.2803
102	ENSECAG00000024983	507.141	1.17798	0.12698	9.27694	1.74418e-20	1.63508e-18	701.868	685.561	773.77	652.179	323.195	286.879	325.713	307.959
103	ENSECAG00000021999	219.992	1.46718	0.158319	9.26719	1.91116e-20	1.77422e-18	319.933	357.149	306.069	308.109	98.7307	122.136	122.556	125.252
104	ENSECAG00000019691	846.426	2.39371	0.258531	9.25889	2.06566e-20	1.89922e-18	921.356	1659.3	1322.29	1785.47	208.431	363.569	206.469	304.512
105	ENSECAG00000006963	74.3301	2.87453	0.310807	9.24861	2.27429e-20	2.07112e-18	86.8034	136.291	173.668	126.354	18.5647	18.9359	11.0411	22.9821
106	ENSECAG00000010004	69.3999	2.31027	0.250733	9.21406	3.14032e-20	2.78034e-18	111.604	120.692	107.468	123.438	28.691	28.4038	17.6658	17.2365
107	ENSECAG00000010132	207.212	2.92079	0.316988	9.21422	3.13563e-20	2.78034e-18	198.408	573.08	304.35	388.781	54.0065	54.9141	49.6851	34.4731
108	ENSECAG00000020587	321.424	-2.55754	0.27755	-9.2147	3.12142e-20	2.78034e-18	112.844	55.0091	125.523	80.672	482.683	393.866	693.383	627.41
109	ENSECAG00000000398	140.484	-2.65434	0.288327	-9.206	3.3849e-20	2.96939e-18	59.5223	22.9889	40.408	33.0463	216.87	322.857	236.28	191.9
110	ENSECAG00000014771	651.883	2.21227	0.242742	9.11367	7.9644e-20	6.92324e-18	1285.93	1089.51	999.883	915.578	232.059	348.42	166.721	176.962
111	ENSECAG00000020669	2269.11	1.42679	0.156815	9.09853	9.15664e-20	7.88791e-18	3377.89	3206.13	3370.2	3275.48	915.58	1347.29	1265.31	1395.01
112	ENSECAG00000000216	378.205	2.44018	0.268322	9.09423	9.5261e-20	8.13291e-18	395.576	740.57	715.307	701.749	94.5114	81.4243	140.222	156.278
113	ENSECAG00000016613	262.587	1.58681	0.174583	9.08913	9.98316e-20	8.4477e-18	354.654	400.663	416.976	402.388	130.797	106.041	122.556	166.62
114	ENSECAG00000012876	69.3468	2.61468	0.291091	8.98237	2.64994e-19	2.2227e-17	153.766	107.555	96.2914	119.55	22.784	15.1487	13.2493	26.4294
115	ENSECAG00000029533	60.3903	-3.88599	0.432764	-8.97947	2.72081e-19	2.26229e-17	13.6405	1.64206	7.7377	8.74756	93.6676	71.0095	155.68	130.998
116	ENSECAG00000019073	211.558	-1.54114	0.173407	-8.88738	6.25671e-19	5.15747e-17	124.005	110.839	100.59	98.1671	277.627	350.314	280.445	350.476
117	ENSECAG00000009585	53.1908	2.36294	0.266004	8.88313	6.50063e-19	5.31274e-17	80.6032	100.987	90.2732	84.5598	17.7209	19.8827	16.5617	14.9383
118	ENSECAG00000008583	145.116	1.66135	0.1874	8.86528	7.63144e-19	6.18405e-17	209.568	263.551	193.443	214.801	61.6012	73.8499	72.8714	71.2444
119	ENSECAG00000010560	135.153	-4.05865	0.462141	-8.78226	1.60216e-18	1.28738e-16	33.4813	5.74722	12.0364	11.6634	418.551	160.008	150.159	289.574
120	ENSECAG00000020252	1147.53	1.21017	0.137993	8.76979	1.78996e-18	1.4263e-16	1439.7	1729.09	1607.72	1632.88	677.613	762.169	581.867	749.215
121	ENSECAG00000008678	1697.5	-1.64778	0.18803	-8.76336	1.89509e-18	1.49759e-16	917.636	902.314	764.313	701.749	3160.23	1886.96	2763.59	2483.21
122	ENSECAG00000021583	41.2116	3.79993	0.434412	8.74731	2.18502e-18	1.71255e-16	49.6019	94.4186	61.0419	102.055	3.37541	5.68076	6.62467	6.89462
123	ENSECAG00000012469	605.454	-1.26272	0.144498	-8.73869	2.35825e-18	1.8333e-16	431.537	351.402	339.599	304.221	852.291	805.722	884.394	874.467
124	ENSECAG00000014207	294.658	2.29039	0.262906	8.7118	2.99097e-18	2.30643e-16	715.508	365.359	520.145	355.734	85.2291	82.3711	121.452	111.463
125	ENSECAG00000011560	206.683	2.39223	0.275283	8.69006	3.62234e-18	2.77094e-16	243.05	504.934	288.014	352.818	59.0697	88.0518	48.5809	68.9462
126	ENSECAG00000024648	30.6204	4.15003	0.477929	8.68335	3.84263e-18	2.91613e-16	62.0024	59.1143	47.286	63.1768	1.6877	3.78718	3.31234	4.59641
127	ENSECAG00000034729	49.2494	-5.08318	0.586102	-8.67286	4.21398e-18	3.17276e-16	2.4801	5.74722	0	2.91585	70.8836	169.476	56.3097	86.1827
128	ENSECAG00000003271	106.97	1.65461	0.191399	8.6448	5.39014e-18	4.0266e-16	166.167	146.144	159.912	176.895	50.6311	44.4993	55.2056	56.306
129	ENSECAG00000019642	160.359	-1.46251	0.169366	-8.63521	5.86208e-18	4.34521e-16	83.0833	87.0293	91.9927	78.7281	228.684	208.295	267.195	237.864
130	ENSECAG00000000354	42.8837	-3.44983	0.401473	-8.59295	8.4768e-18	6.23501e-16	2.4801	13.1365	3.43898	8.74756	63.2889	95.6262	82.8084	73.5426
131	ENSECAG00000031030	236.805	-1.36465	0.159166	-8.57373	1.00183e-17	7.31263e-16	133.925	121.513	153.894	120.522	321.508	381.558	319.088	342.433
132	ENSECAG00000012829	546.323	1.39528	0.1628	8.57054	1.03005e-17	7.4616e-16	865.554	838.273	720.466	744.515	341.76	345.58	262.779	251.653
133	ENSECAG00000018254	2867.76	-1.28887	0.150639	-8.55604	1.16808e-17	8.39786e-16	1664.15	1651.09	1741.84	1604.69	3772.86	3252.24	4559.98	4695.23
134	ENSECAG00000022109	736.078	-1.10228	0.128936	-8.54906	1.24098e-17	8.85541e-16	448.898	412.979	513.268	495.695	989.839	978.985	956.161	1092.8
135	ENSECAG00000020975	224.297	1.73864	0.203654	8.5372	1.37516e-17	9.74019e-16	252.97	344.012	404.94	378.089	114.764	84.2647	101.578	113.761
136	ENSECAG00000010081	356.274	-1.24656	0.146271	-8.52228	1.5644e-17	1.09991e-15	190.968	228.247	212.357	212.857	547.66	521.683	510.1	426.317
137	ENSECAG00000008730	255.85	1.29828	0.15246	8.51554	1.65818e-17	1.15734e-15	326.133	393.274	352.495	382.949	162.02	134.445	136.91	158.576
138	ENSECAG00000018250	162.127	-1.38826	0.163135	-8.50988	1.74107e-17	1.20639e-15	81.8432	86.2083	102.31	87.4756	232.903	250.9	217.51	237.864
139	ENSECAG00000012792	320.796	2.32457	0.274045	8.48241	2.20569e-17	1.51732e-15	486.099	509.861	613.858	529.713	80.166	172.317	64.0385	110.314
140	ENSECAG00000022204	117.37	1.6229	0.191394	8.47935	2.26447e-17	1.54663e-15	155.006	166.669	198.601	187.587	50.6311	58.7012	57.4138	64.3497
141	ENSECAG00000015725	411.94	-1.04699	0.123497	-8.47787	2.29344e-17	1.55531e-15	241.81	274.225	286.295	271.174	569.6	567.13	550.952	534.333
142	ENSECAG00000017520	30.2776	4.38897	0.518244	8.46892	2.47673e-17	1.66778e-15	63.2425	47.6198	62.7614	57.3451	2.53156	0.946794	6.62467	1.1491
143	ENSECAG00000010385	315.597	1.93957	0.22954	8.44981	2.91787e-17	1.9511e-15	385.655	501.65	628.473	485.004	105.482	100.36	144.639	173.514
144	ENSECAG00000024471	67.0287	2.45563	0.290801	8.44436	3.05719e-17	2.03006e-15	106.644	146.144	119.504	81.6439	21.9402	26.5102	15.4576	18.3856
145	ENSECAG00000007824	442.661	-1.63404	0.194418	-8.40474	4.28813e-17	2.8278e-15	241.81	220.036	217.515	184.671	758.623	808.562	619.407	490.667
146	ENSECAG00000009904	379.2	1.34239	0.159901	8.39514	4.65346e-17	3.0477e-15	463.778	498.366	576.029	636.628	201.681	213.029	240.696	203.391
147	ENSECAG00000017265	402.486	1.60467	0.192135	8.35182	6.72205e-17	4.37253e-15	544.381	547.628	757.435	572.479	199.149	155.274	197.636	245.908
148	ENSECAG00000023141	1030.59	1.48354	0.177707	8.34823	6.92917e-17	4.47681e-15	1572.38	1678.19	1195.04	1628.02	597.447	547.247	417.354	609.024
149	ENSECAG00000023317	74.2124	2.03407	0.244268	8.32719	8.27858e-17	5.31273e-15	122.765	94.4186	131.541	129.27	34.5979	30.2974	22.0822	28.7276
150	ENSECAG00000023416	57.971	-3.26539	0.392284	-8.32405	8.50066e-17	5.41889e-15	16.1206	9.85238	5.15847	13.6073	148.518	124.977	66.2467	79.2881
151	ENSECAG00000037332	92.3483	2.6757	0.321975	8.31026	9.549e-17	6.04686e-15	101.684	255.341	131.541	149.681	23.6279	21.7763	28.7069	26.4294
152	ENSECAG00000013108	118.073	2.2632	0.272422	8.30769	9.75805e-17	6.13858e-15	125.245	185.553	214.076	256.595	48.0996	29.3506	40.8522	44.815
153	ENSECAG00000017912	54.5305	2.64393	0.318508	8.30098	1.03254e-16	6.45306e-15	58.2823	110.839	112.627	94.2793	15.1893	17.9891	13.2493	13.7892
154	ENSECAG00000023271	122.177	-1.70753	0.206046	-8.28714	1.16004e-16	7.2028e-15	76.883	59.1143	48.1457	46.6537	182.272	206.401	183.283	174.664
155	ENSECAG00000020963	317.641	-1.40163	0.169262	-8.28084	1.22307e-16	7.54516e-15	189.727	192.121	155.614	161.344	561.162	445.94	427.291	407.931
156	ENSECAG00000021658	1149.07	1.24024	0.150094	8.2631	1.41943e-16	8.70038e-15	1587.26	1888.37	1521.75	1460.84	626.982	783.945	601.741	721.636
157	ENSECAG00000010849	263.268	-1.2351	0.149734	-8.24864	1.60211e-16	9.75755e-15	159.966	153.533	162.492	151.624	337.541	348.42	430.604	361.967
158	ENSECAG00000010355	151.822	-1.41615	0.17246	-8.21148	2.18486e-16	1.32225e-14	80.6032	72.2508	84.255	94.2793	221.089	221.55	242.905	197.646
159	ENSECAG00000015920	623.475	1.11067	0.135351	8.20586	2.28953e-16	1.37689e-14	813.472	928.587	763.453	902.943	381.421	402.387	357.732	437.808
160	ENSECAG00000017376	229.691	-1.38038	0.168293	-8.20222	2.3598e-16	1.41028e-14	120.285	123.976	128.962	136.073	326.571	271.73	388.648	341.283
161	ENSECAG00000017064	131.967	2.042	0.24916	8.19552	2.49511e-16	1.48188e-14	249.25	191.3	214.076	194.39	54.0065	35.9782	39.748	76.9899
162	ENSECAG00000000036	408.188	1.46604	0.178918	8.19391	2.52867e-16	1.49254e-14	606.384	501.65	697.253	590.946	191.554	179.891	247.321	250.504
163	ENSECAG00000018248	1352.83	2.87861	0.352052	8.17665	2.91833e-16	1.71197e-14	4502.62	1353.88	2347.96	1322.83	249.78	383.452	332.338	329.792
164	ENSECAG00000013759	108.931	2.4611	0.301748	8.15613	3.4592e-16	2.01688e-14	279.011	120.692	182.266	155.512	33.7541	24.6166	34.2275	41.3677
165	ENSECAG00000020674	255.442	-1.6473	0.202224	-8.1459	3.76463e-16	2.18166e-14	155.006	109.197	126.382	104.971	300.411	403.334	375.398	468.834
166	ENSECAG00000012399	630.363	-1.19885	0.147438	-8.13123	4.24939e-16	2.44775e-14	383.175	332.518	427.293	386.837	810.098	779.211	982.66	941.115
167	ENSECAG00000017061	27.791	-3.50601	0.43122	-8.13044	4.2774e-16	2.44913e-14	3.72015	5.74722	4.29872	3.88781	40.5049	48.2865	60.7262	55.1569
168	ENSECAG00000023388	68.2202	2.31445	0.284795	8.1267	4.4113e-16	2.51077e-14	107.884	85.3873	146.157	115.662	31.2225	18.9359	20.9781	19.5347
169	ENSECAG00000014982	98.6064	-2.24647	0.276557	-8.123	4.54795e-16	2.57322e-14	17.3607	32.0202	44.7067	41.7939	140.923	201.667	138.014	172.365
170	ENSECAG00000006844	4948.79	2.25089	0.277466	8.11231	4.96683e-16	2.7937e-14	5905.11	9633.98	7717.07	9459.03	948.49	1933.35	1519.26	2474.02
171	ENSECAG00000006859	300.825	-1.20393	0.14846	-8.10941	5.08676e-16	2.84442e-14	181.047	178.164	189.144	180.783	487.747	426.057	378.711	384.949
172	ENSECAG00000007671	161.081	1.57147	0.194303	8.08776	6.07744e-16	3.37863e-14	193.448	284.898	232.131	252.707	80.166	74.7967	73.9755	96.5246
173	ENSECAG00000019974	123.174	-1.59597	0.197639	-8.07518	6.73751e-16	3.72394e-14	42.1617	69.7877	68.7796	62.2049	191.554	172.317	184.387	194.198
174	ENSECAG00000014459	231.021	-1.56214	0.193981	-8.05305	8.07537e-16	4.43774e-14	110.364	119.871	98.8706	138.989	420.238	362.622	317.984	279.232
175	ENSECAG00000006869	126.03	-2.1815	0.271228	-8.04305	8.76304e-16	4.78812e-14	26.041	37.7675	66.2003	50.5415	162.02	202.614	226.343	236.715
176	ENSECAG00000006481	161.466	2.00317	0.24913	8.04064	8.93702e-16	4.85544e-14	162.446	296.392	318.965	255.623	59.9135	77.6371	54.1015	66.6479
177	ENSECAG00000020917	44.1138	2.43336	0.303381	8.02082	1.05044e-15	5.67473e-14	79.3631	79.6401	62.7614	76.7842	19.4086	11.3615	13.2493	10.3419
178	ENSECAG00000011438	113.436	-2.04402	0.255372	-8.0041	1.20346e-15	6.46487e-14	40.9216	56.6512	42.1275	36.9342	167.927	256.581	152.367	153.98
179	ENSECAG00000004005	67.0193	2.18703	0.27337	8.00025	1.24169e-15	6.63297e-14	116.565	140.396	82.5355	100.111	27.0033	19.8827	22.0822	27.5785
180	ENSECAG00000017881	167.673	1.43678	0.179856	7.9885	1.36596e-15	7.25626e-14	218.249	302.14	232.131	226.465	91.136	89.9454	90.5372	90.7791
181	ENSECAG00000018757	86.7648	-1.6214	0.203776	-7.95679	1.76555e-15	9.32715e-14	44.6418	44.3357	41.2677	39.85	118.139	121.19	147.951	136.743
182	ENSECAG00000019795	340.035	1.40318	0.176406	7.95428	1.80173e-15	9.466e-14	496.019	461.42	507.249	508.331	187.335	149.593	166.721	243.61
183	ENSECAG00000008826	88.0434	2.13047	0.269942	7.89232	2.96614e-15	1.54985e-13	188.487	109.197	150.455	126.354	43.8803	28.4038	25.3946	32.1749
184	ENSECAG00000008125	67.5601	1.82319	0.231345	7.88082	3.25237e-15	1.69017e-13	109.124	103.45	91.9927	116.634	30.3787	24.6166	29.811	34.4731
185	ENSECAG00000009258	78.5641	-1.90007	0.241193	-7.87783	3.33113e-15	1.72174e-13	29.7612	46.7988	29.2313	26.2427	129.953	132.551	123.661	110.314
186	ENSECAG00000041112	137.084	-2.02572	0.257288	-7.87335	3.45276e-15	1.77502e-13	76.883	53.3671	46.4262	40.822	228.684	166.636	195.428	288.425
187	ENSECAG00000016440	107.635	-1.5596	0.198184	-7.86946	3.56178e-15	1.82127e-13	40.9216	53.3671	66.2003	56.3732	173.834	156.221	157.888	156.278
188	ENSECAG00000022375	273.995	-1.19635	0.152133	-7.86389	3.72391e-15	1.89404e-13	171.127	173.238	158.193	164.26	420.238	418.483	356.628	329.792
189	ENSECAG00000008101	160.545	1.65016	0.210025	7.85697	3.9355e-15	1.98185e-13	199.648	318.56	214.936	240.072	71.7274	81.4243	70.6632	87.3318
190	ENSECAG00000009054	48.9157	-8.39055	1.06792	-7.85689	3.93801e-15	1.98185e-13	0	0.821032	0	0	80.166	150.54	82.8084	76.9899
191	ENSECAG00000006765	29.7645	3.39543	0.432963	7.8423	4.42376e-15	2.21466e-13	47.1219	51.725	64.4808	54.4293	8.43852	1.89359	7.72879	2.29821
192	ENSECAG00000020699	1160.57	-1.12418	0.143399	-7.83951	4.52299e-15	2.25254e-13	884.155	683.098	671.461	683.282	1520.62	1459.96	1744.5	1637.47
193	ENSECAG00000024322	29.1265	3.47384	0.444268	7.81924	5.31436e-15	2.63295e-13	66.9626	59.9353	45.5665	40.822	2.53156	4.73397	4.41645	8.04372
194	ENSECAG00000024604	32.051	2.65916	0.340911	7.80017	6.18241e-15	3.04723e-13	59.5223	49.2619	54.1639	58.3171	8.43852	7.57435	9.93701	9.19282
195	ENSECAG00000024993	5781.26	-1.57998	0.202949	-7.78511	6.96537e-15	3.41553e-13	4035.12	2363.75	2546.56	2649.54	7805.63	7603.7	10447.1	8798.68
196	ENSECAG00000021493	168.96	1.47041	0.189006	7.77971	7.26931e-15	3.54639e-13	275.291	194.584	274.259	248.82	84.3852	80.4775	92.7454	101.121
197	ENSECAG00000019690	547.79	2.31122	0.297375	7.77209	7.7204e-15	3.74733e-13	606.384	729.076	1383.33	927.242	149.362	124.03	202.053	260.846
198	ENSECAG00000007825	44.9395	-6.14753	0.79177	-7.76429	8.21051e-15	3.9651e-13	4.96019	0	0	0.971951	39.6611	63.4352	85.0166	165.471
199	ENSECAG00000016060	184.279	1.5344	0.19774	7.75967	8.51487e-15	4.09141e-13	291.411	291.466	246.747	266.315	75.9467	124.03	79.4961	98.8228
200	ENSECAG00000012670	4253.78	-1.47637	0.191355	-7.71534	1.20663e-14	5.76891e-13	1878.67	3055.88	2046.19	2013.88	5742.41	5403.35	6751.65	7138.22
201	ENSECAG00000024869	156.517	1.48885	0.193127	7.70916	1.26645e-14	6.02477e-13	221.969	181.448	273.399	246.876	87.7606	85.2115	76.1837	79.2881
202	ENSECAG00000001324	32.0174	-2.9371	0.381859	-7.69156	1.45352e-14	6.88047e-13	9.92039	6.56825	6.87796	6.80366	70.0397	60.5948	57.4138	37.9204
203	ENSECAG00000023851	237.26	1.25229	0.1633	7.66863	1.73843e-14	8.18862e-13	288.931	389.169	334.441	323.66	150.206	129.711	130.285	151.682
204	ENSECAG00000020589	191.284	-1.68292	0.219849	-7.65487	1.93511e-14	9.07036e-13	58.2823	89.4924	112.627	101.083	286.066	245.22	344.483	293.021
205	ENSECAG00000039438	803.055	1.60746	0.2107	7.62915	2.36306e-14	1.10222e-12	1015.6	1367.84	1122.83	1329.63	270.877	501.801	366.565	449.299
206	ENSECAG00000020507	154.689	-1.53893	0.201914	-7.62167	2.50411e-14	1.16234e-12	69.4427	91.9555	78.2368	76.7842	284.378	231.018	224.135	181.558
207	ENSECAG00000019800	26.6706	-3.61809	0.475327	-7.61179	2.70326e-14	1.24872e-12	2.4801	5.74722	2.57923	4.85976	37.9733	37.8718	55.2056	66.6479
208	ENSECAG00000018253	329.111	1.23609	0.162451	7.60899	2.76242e-14	1.26992e-12	491.059	423.652	460.823	473.34	228.684	153.381	203.157	198.795
209	ENSECAG00000019829	273.979	-1.10419	0.145139	-7.60786	2.78669e-14	1.27495e-12	192.208	171.596	176.248	156.484	377.202	340.846	411.834	365.415
210	ENSECAG00000018958	218.268	-1.16155	0.152909	-7.59636	3.04587e-14	1.38688e-12	148.806	119.871	141.858	130.241	302.099	332.325	285.965	284.977
211	ENSECAG00000005244	216.234	-1.25847	0.165766	-7.5918	3.15498e-14	1.42976e-12	131.445	115.765	135.84	127.326	281.003	347.473	329.025	261.995
212	ENSECAG00000013610	99.3318	-1.60318	0.211384	-7.58418	3.346e-14	1.50917e-12	62.0024	53.3671	45.5665	36.9342	166.239	145.806	146.847	137.892
213	ENSECAG00000016497	59.6041	1.90171	0.251004	7.57644	3.55179e-14	1.59447e-12	96.7238	81.2821	112.627	85.5317	22.784	28.4038	26.4987	22.9821
214	ENSECAG00000011479	38.7976	2.83482	0.374732	7.56493	3.88065e-14	1.73396e-12	79.3631	47.6198	79.0965	67.0646	11.8139	14.2019	6.62467	4.59641
215	ENSECAG00000000565	40.6991	2.33447	0.309021	7.55441	4.20763e-14	1.87132e-12	81.8432	61.5774	64.4808	64.1488	10.9701	18.9359	12.1452	11.491
216	ENSECAG00000008484	183.148	2.20602	0.292077	7.55288	4.25739e-14	1.88468e-12	190.968	403.948	294.033	314.912	46.4119	97.5198	51.8933	65.4988
217	ENSECAG00000001129	683.161	-1.8829	0.250819	-7.50699	6.05002e-14	2.66591e-12	261.65	238.099	361.093	304.221	751.872	897.561	1612	1038.79
218	ENSECAG00000028640	145.021	1.61702	0.2156	7.50011	6.37662e-14	2.79694e-12	224.449	200.332	239.009	209.941	65.8205	51.1269	70.6632	98.8228
219	ENSECAG00000021941	46.5473	-2.13653	0.285109	-7.49374	6.69396e-14	2.92272e-12	9.92039	20.5258	19.7741	17.4951	72.5713	69.116	89.4331	73.5426
220	ENSECAG00000014981	100.679	1.46093	0.195024	7.49102	6.83408e-14	2.97034e-12	158.726	139.575	136.699	155.512	53.1627	44.4993	55.2056	62.0515
221	ENSECAG00000028274	123.747	-1.40537	0.187776	-7.48428	7.19385e-14	3.11256e-12	74.4029	68.9667	58.4626	69.9805	162.863	178.944	210.885	165.471
222	ENSECAG00000012677	451.4	1.02422	0.137205	7.46486	8.33859e-14	3.5916e-12	629.945	605.1	596.663	588.031	282.69	254.688	332.338	321.749
223	ENSECAG00000013295	157.182	-1.31977	0.176838	-7.46313	8.44924e-14	3.62294e-12	80.6032	105.913	81.6757	90.3915	201.681	239.539	246.217	211.435
224	ENSECAG00000009402	55.2643	3.14738	0.422011	7.45806	8.7807e-14	3.74826e-12	38.4415	105.913	111.767	140.933	8.43852	15.1487	8.8329	12.6401
225	ENSECAG00000023374	52.6412	2.08774	0.279966	7.45714	8.84239e-14	3.75782e-12	90.5236	105.913	67.0601	77.7561	23.6279	17.9891	19.874	18.3856
226	ENSECAG00000021408	93.4055	1.47382	0.197738	7.45338	9.0978e-14	3.84926e-12	136.405	151.891	133.26	127.326	49.7873	41.6589	55.2056	51.7096
227	ENSECAG00000040181	110.139	-1.42072	0.190667	-7.45129	9.24341e-14	3.89363e-12	70.6828	54.1881	61.0419	54.4293	141.767	161.902	158.992	178.111
229	ENSECAG00000024271	48.1897	-2.27722	0.306876	-7.42066	1.1654e-13	4.86616e-12	23.5609	12.3155	14.6157	16.5232	62.4451	100.36	70.6632	85.0336
230	ENSECAG00000014563	230.189	-1.14778	0.154961	-7.40691	1.29281e-13	5.37471e-12	152.526	144.502	135.84	139.961	315.601	277.411	310.256	365.415
231	ENSECAG00000018564	52.5487	2.38626	0.322316	7.40347	1.32672e-13	5.49183e-12	84.3233	119.05	70.4991	79.7	18.5647	24.6166	12.1452	11.491
232	ENSECAG00000023395	30.2698	3.83785	0.519906	7.38181	1.56152e-13	6.43588e-12	65.7226	80.4611	39.5482	40.822	2.53156	8.52115	1.10411	3.44731
233	ENSECAG00000007410	92.6337	-1.68565	0.228498	-7.37711	1.61763e-13	6.63852e-12	34.7214	50.0829	36.1093	54.4293	169.614	138.232	129.181	128.699
234	ENSECAG00000009501	154.147	1.98472	0.269215	7.37223	1.67797e-13	6.85671e-12	321.173	235.636	269.96	158.428	63.2889	79.5307	41.9563	63.2006
235	ENSECAG00000018793	27.289	2.85493	0.38739	7.36966	1.71061e-13	6.96038e-12	40.9216	48.4409	53.3042	49.5695	7.59467	9.46794	4.41645	4.59641
236	ENSECAG00000017659	82.3215	-1.52692	0.207359	-7.36365	1.78943e-13	7.25022e-12	45.8818	39.4095	42.1275	42.7659	120.671	124.03	139.118	104.568
237	ENSECAG00000016931	334.072	1.54169	0.209562	7.35675	1.88443e-13	7.60291e-12	509.66	383.422	601.821	493.751	174.677	129.711	161.2	218.329
238	ENSECAG00000005460	65.6912	1.62514	0.221061	7.35152	1.95966e-13	7.87324e-12	93.0037	92.7766	104.889	105.943	29.5348	34.0846	33.1234	32.1749
239	ENSECAG00000016619	93.6229	1.54371	0.210914	7.31917	2.49509e-13	9.98243e-12	110.364	148.607	136.699	161.344	46.4119	45.4461	52.9974	47.1132
240	ENSECAG00000021824	224.086	-1.16837	0.16019	-7.29367	3.01618e-13	1.2017e-11	156.246	140.396	123.803	133.157	336.697	334.218	269.403	298.767
241	ENSECAG00000016917	362.252	-1.41344	0.193865	-7.29086	3.07988e-13	1.22198e-11	152.526	210.184	220.095	206.054	461.587	429.844	571.93	645.796
242	ENSECAG00000009487	497.965	-1.09494	0.150733	-7.2641	3.75527e-13	1.4838e-11	336.053	327.592	344.758	261.455	661.58	598.374	697.799	756.109
243	ENSECAG00000012007	21.7921	-4.46037	0.615549	-7.24616	4.28744e-13	1.6871e-11	0	0.821032	2.57923	3.88781	27.8471	43.5525	49.6851	45.9641
244	ENSECAG00000021923	202.467	-1.12974	0.15594	-7.24469	4.33435e-13	1.69857e-11	133.925	130.544	123.803	120.522	297.036	297.293	237.384	279.232
245	ENSECAG00000012106	27.9639	-2.79941	0.386496	-7.24306	4.38672e-13	1.71208e-11	3.72015	7.38928	6.87796	9.71951	61.6012	46.3929	39.748	48.2623
246	ENSECAG00000024928	220.337	-1.92359	0.265945	-7.23303	4.7233e-13	1.83594e-11	86.8034	64.0405	121.224	95.2512	263.282	264.156	470.352	397.589
248	ENSECAG00000036849	43.5343	-2.2789	0.316259	-7.2058	5.77053e-13	2.22649e-11	14.8806	15.5996	19.7741	8.74756	55.6942	68.1692	86.1208	79.2881
249	ENSECAG00000036534	480.429	-2.48246	0.344576	-7.20439	5.8304e-13	2.23897e-11	209.568	85.3873	196.022	93.3073	789.846	503.694	1253.17	712.444
250	ENSECAG00000020223	22.6995	3.27611	0.455039	7.19961	6.03835e-13	2.30955e-11	44.6418	48.4409	33.53	37.9061	3.37541	4.73397	5.52056	3.44731
251	ENSECAG00000011846	140.174	-1.52719	0.212248	-7.19531	6.23195e-13	2.3741e-11	49.6019	94.4186	67.0601	75.8122	195.774	203.561	234.072	201.093
252	ENSECAG00000010862	61.5176	2.04956	0.285013	7.19112	6.42638e-13	2.43846e-11	102.924	67.3246	110.047	115.662	21.0963	20.8295	22.0822	32.1749
253	ENSECAG00000013979	63.8249	1.7876	0.249004	7.17902	7.02144e-13	2.65371e-11	109.124	94.4186	102.31	91.3634	36.2856	33.1378	20.9781	22.9821
254	ENSECAG00000023645	29.5643	-7.66219	1.07035	-7.15855	8.15356e-13	3.06946e-11	0	0.821032	0	0	77.6344	38.8186	62.9344	56.306
255	ENSECAG00000019392	94.3395	1.55508	0.218024	7.13259	9.84994e-13	3.69353e-11	125.245	128.902	137.559	171.063	46.4119	48.2865	38.6439	58.6042
256	ENSECAG00000006931	81.0306	1.89302	0.265612	7.127	1.02581e-12	3.83155e-11	135.165	151.891	98.8706	124.41	29.5348	36.925	23.1864	48.2623
257	ENSECAG00000013883	19.5699	-4.31179	0.605595	-7.11993	1.07985e-12	4.01772e-11	0	0.821032	4.29872	1.9439	35.4418	40.7121	33.1234	40.2186
258	ENSECAG00000017232	30.0041	-6.36225	0.894075	-7.11601	1.11096e-12	4.11743e-11	1.24005	0	0	1.9439	37.9733	64.382	55.2056	79.2881
259	ENSECAG00000021359	505.518	-1.05908	0.148951	-7.11031	1.15784e-12	4.27463e-11	290.171	325.95	383.446	310.052	634.577	649.501	782.816	667.629
262	ENSECAG00000000811	91.5326	-1.41402	0.199819	-7.07654	1.478e-12	5.39414e-11	43.4017	50.904	52.4444	52.4854	149.362	114.562	135.806	133.296
263	ENSECAG00000024623	268.319	1.03216	0.146067	7.06633	1.59084e-12	5.7839e-11	345.974	398.2	362.812	334.351	166.239	198.827	168.929	171.216
264	ENSECAG00000040270	185.767	-1.36725	0.193799	-7.05501	1.72587e-12	6.25106e-11	140.126	100.987	96.2914	79.7	286.91	252.794	263.883	265.443
265	ENSECAG00000019911	128.219	-1.2701	0.180054	-7.05401	1.7383e-12	6.2723e-11	81.8432	66.5036	80.816	71.9244	157.8	199.774	184.387	182.707
266	ENSECAG00000021134	22.9272	-4.37944	0.623747	-7.02119	2.19985e-12	7.9079e-11	1.24005	4.10516	0.859745	1.9439	41.3488	71.0095	35.3316	27.5785
267	ENSECAG00000014597	66.1041	1.60877	0.229892	6.99795	2.59738e-12	9.30194e-11	109.124	103.45	84.255	101.083	29.5348	30.2974	32.0193	39.0695
268	ENSECAG00000014864	131.024	1.95601	0.279763	6.99168	2.71605e-12	9.69062e-11	116.565	256.162	210.637	249.792	48.9434	69.116	45.2686	51.7096
269	ENSECAG00000010951	66.4364	-1.87381	0.268585	-6.97661	3.02397e-12	1.07491e-10	18.6007	22.1679	42.1275	30.1305	115.608	101.307	101.578	99.9719
270	ENSECAG00000026851	26.0087	-2.54751	0.365367	-6.97247	3.11415e-12	1.10287e-10	7.44029	6.56825	9.45719	6.80366	41.3488	40.7121	47.4768	48.2623
271	ENSECAG00000020719	108.334	1.55596	0.223635	6.95755	3.46237e-12	1.22167e-10	168.647	164.206	151.315	163.288	73.4151	37.8718	58.518	49.4114
272	ENSECAG00000020872	306.252	-1.02372	0.147354	-6.94735	3.72207e-12	1.30847e-10	193.448	178.985	230.412	205.082	453.149	407.121	384.231	397.589
273	ENSECAG00000017386	204.09	1.75166	0.252667	6.93268	4.12933e-12	1.44105e-10	375.735	329.234	297.472	257.567	86.9168	142.966	76.1837	66.6479
274	ENSECAG00000023631	48.6966	-1.84084	0.265528	-6.93274	4.12778e-12	1.44105e-10	14.8806	24.6309	24.9326	19.439	73.4151	77.6371	68.455	86.1827
275	ENSECAG00000013874	8165.43	1.906	0.27528	6.92385	4.39525e-12	1.52827e-10	13924.5	12865.6	12671.8	12102.7	2309.62	5624.9	2211.54	3612.78
276	ENSECAG00000020735	85.2829	1.62899	0.235628	6.91339	4.73201e-12	1.6394e-10	106.644	105.092	155.614	147.737	40.5049	39.7653	38.6439	48.2623
277	ENSECAG00000029003	81.0915	1.82289	0.263748	6.91146	4.79696e-12	1.6559e-10	95.4838	119.871	130.681	158.428	24.4717	34.0846	39.748	45.9641
278	ENSECAG00000021174	26.2531	7.41518	1.07439	6.90178	5.13549e-12	1.76639e-10	65.7226	33.6623	47.286	62.2049	0	0	0	1.1491
280	ENSECAG00000037214	24.9876	-7.41569	1.07542	-6.89564	5.36234e-12	1.83124e-10	0	0.821032	0	0	51.475	37.8718	70.6632	39.0695
281	ENSECAG00000002715	136.286	1.34956	0.195944	6.8875	5.67796e-12	1.93212e-10	162.446	243.025	191.723	185.643	85.2291	74.7967	76.1837	71.2444
282	ENSECAG00000014566	95.3878	3.52819	0.512668	6.88201	5.90138e-12	2.00103e-10	399.296	71.4297	153.894	77.7561	18.5647	9.46794	15.4576	17.2365
283	ENSECAG00000006133	42.5289	-2.42634	0.352814	-6.8771	6.10831e-12	2.06387e-10	8.68034	11.4944	18.9144	13.6073	82.6975	42.6057	79.4961	82.7354
284	ENSECAG00000021973	23.8566	-7.35172	1.07039	-6.86827	6.49854e-12	2.18799e-10	1.24005	0	0	0	52.3188	60.5948	35.3316	41.3677
285	ENSECAG00000018444	15.7971	-7.49112	1.0943	-6.84557	7.61739e-12	2.5557e-10	0	0	0	0	43.0365	35.9782	22.0822	25.2803
286	ENSECAG00000022215	166.266	-1.17939	0.173195	-6.80961	9.7865e-12	3.27198e-10	107.884	102.629	103.169	94.2793	256.531	213.029	257.258	195.347
287	ENSECAG00000015342	207.023	-5.21908	0.767895	-6.79661	1.07112e-11	3.56867e-10	13.6405	0.821032	6.87796	22.3549	250.624	318.123	357.732	686.014
288	ENSECAG00000023203	76.3395	2.80407	0.413045	6.78878	1.13088e-11	3.75469e-10	50.842	161.743	155.614	165.232	8.43852	22.7231	24.2905	21.8329
289	ENSECAG00000031204	100.164	-1.49223	0.219874	-6.78673	1.14701e-11	3.79507e-10	62.0024	36.9464	54.1639	58.3171	164.551	125.924	153.472	145.936
291	ENSECAG00000022423	143.932	5.86818	0.865367	6.78114	1.19231e-11	3.9215e-10	534.461	94.4186	333.581	170.091	12.6578	2.84038	1.10411	2.29821
292	ENSECAG00000007734	56.2195	2.52739	0.373112	6.77381	1.25431e-11	4.10744e-10	107.884	73.0718	113.486	89.4195	28.691	6.62756	11.0411	19.5347
293	ENSECAG00000040215	1016.41	-1.35864	0.200641	-6.77149	1.27462e-11	4.15969e-10	488.579	508.219	605.26	678.422	1582.22	1004.55	1677.15	1586.91
295	ENSECAG00000022690	30.1631	-2.95591	0.436888	-6.76584	1.32541e-11	4.29612e-10	6.20024	9.03135	3.43898	8.74756	36.2856	51.1269	82.8084	43.6659
296	ENSECAG00000025104	1433.5	1.09474	0.1622	6.74935	1.48513e-11	4.79757e-10	1519.06	2148.64	2146.78	1994.44	892.796	819.924	879.977	1066.37
297	ENSECAG00000014281	90.7313	1.30436	0.193458	6.74236	1.5583e-11	5.01699e-10	116.565	144.502	123.803	131.213	49.7873	53.0205	54.1015	52.8587
298	ENSECAG00000035897	36.6821	2.53626	0.377206	6.7238	1.77049e-11	5.68101e-10	38.4415	84.5663	57.6029	69.0085	10.1262	6.62756	12.1452	14.9383
299	ENSECAG00000006110	16.245	-7.51444	1.11926	-6.71374	1.897e-11	6.06659e-10	0	0	0	0	15.1893	32.191	32.0193	50.5605
300	ENSECAG00000010277	301.312	1.11776	0.166516	6.71265	1.91124e-11	6.09175e-10	393.095	408.874	412.677	433.49	151.05	173.263	219.718	218.329
301	ENSECAG00000023524	100.943	1.33459	0.19903	6.70544	2.00805e-11	6.37905e-10	117.805	156.817	141.858	161.344	59.9135	55.8608	51.8933	62.0515
302	ENSECAG00000001130	44.1666	-1.92984	0.288072	-6.69914	2.09646e-11	6.63785e-10	14.8806	13.9575	24.9326	19.439	75.9467	73.8499	72.8714	57.4551
303	ENSECAG00000000685	426.081	-1.89268	0.282555	-6.69843	2.10674e-11	6.64839e-10	282.731	131.365	188.284	122.466	516.438	596.48	900.956	669.927
304	ENSECAG00000002810	32.6525	-2.96024	0.442181	-6.69464	2.16197e-11	6.80026e-10	2.4801	10.6734	6.01821	9.71951	47.2557	36.925	58.518	89.63
305	ENSECAG00000019675	519.732	-1.11802	0.167065	-6.69209	2.20007e-11	6.89739e-10	306.292	304.603	404.94	294.501	729.088	589.853	782.816	745.768
306	ENSECAG00000008941	299.967	1.03502	0.154759	6.68798	2.2628e-11	7.07087e-10	446.418	421.189	326.703	418.911	199.149	186.518	202.053	198.795
307	ENSECAG00000005014	152.813	1.23062	0.184043	6.68658	2.28451e-11	7.11547e-10	224.449	206.9	229.552	195.362	81.0098	85.2115	82.8084	117.208
308	ENSECAG00000020055	353.568	1.26107	0.188754	6.68103	2.37265e-11	7.36599e-10	378.215	552.554	568.291	494.723	183.116	183.678	218.614	249.355
309	ENSECAG00000011267	183.058	1.28796	0.192955	6.67489	2.47415e-11	7.63155e-10	272.811	269.298	226.113	272.146	122.359	122.136	76.1837	103.419
310	ENSECAG00000012692	36.5435	-3.12843	0.46868	-6.67499	2.47249e-11	7.63155e-10	1.24005	14.7786	4.29872	8.74756	78.4783	88.0518	50.7892	45.9641
311	ENSECAG00000013968	310.611	-1.10791	0.166012	-6.67367	2.49483e-11	7.67059e-10	190.968	235.636	204.619	155.512	464.119	409.015	423.979	401.037
312	ENSECAG00000014723	49.2558	2.13971	0.321589	6.65357	2.86068e-11	8.76725e-10	68.2027	53.3671	110.907	88.4476	18.5647	15.1487	19.874	19.5347
313	ENSECAG00000018018	87.5681	-1.3168	0.198289	-6.64078	3.12019e-11	9.53203e-10	47.1219	55.0091	51.5847	46.6537	135.86	129.711	108.203	126.401
314	ENSECAG00000023261	396.607	1.12301	0.169287	6.63378	3.27189e-11	9.96363e-10	586.543	611.669	472.86	504.443	250.624	300.134	207.573	239.013
315	ENSECAG00000024373	85.6377	-1.37565	0.207454	-6.63111	3.33182e-11	1.01139e-09	50.842	43.5147	47.286	49.5695	144.299	105.094	119.244	125.252
317	ENSECAG00000006213	32.5734	2.17101	0.327579	6.62742	3.41604e-11	1.02717e-09	57.0422	50.904	44.7067	60.261	8.43852	13.2551	11.0411	14.9383
318	ENSECAG00000042533	154.345	1.32231	0.199507	6.62787	3.40562e-11	1.02717e-09	207.088	253.699	210.637	209.941	84.3852	88.9986	66.2467	113.761
319	ENSECAG00000016948	178.382	-1.20942	0.182758	-6.6176	3.65066e-11	1.09428e-09	127.725	111.66	88.5537	103.999	230.372	253.741	290.382	220.628
320	ENSECAG00000016874	311.331	-1.44239	0.218205	-6.61025	3.83669e-11	1.14645e-09	126.485	172.417	194.302	174.951	417.707	324.75	538.807	541.227
321	ENSECAG00000012645	13.1675	-7.22386	1.09303	-6.60905	3.86793e-11	1.15219e-09	0	0	0	0	27.0033	31.2442	28.7069	18.3856
322	ENSECAG00000014803	72.5375	1.44651	0.219074	6.60282	4.03413e-11	1.19796e-09	110.364	116.586	95.4316	103.027	45.568	40.7121	36.4357	32.1749
323	ENSECAG00000020956	14.6903	-7.37542	1.11758	-6.59948	4.12598e-11	1.22144e-09	0	0	0	0	34.5979	13.2551	38.6439	31.0258
324	ENSECAG00000016464	800.232	1.35355	0.205213	6.59582	4.22905e-11	1.24809e-09	1006.92	918.734	1462.43	1212.02	438.803	336.112	518.933	507.903
325	ENSECAG00000020614	53.4995	-1.67116	0.253794	-6.58469	4.55822e-11	1.3411e-09	26.041	24.6309	30.9508	20.411	84.3852	70.0628	77.2879	94.2264
326	ENSECAG00000011764	83.1715	-1.28182	0.195149	-6.5684	5.08604e-11	1.4918e-09	43.4017	53.3671	51.5847	44.7098	118.139	115.509	121.452	117.208
327	ENSECAG00000021193	159.422	-1.26404	0.192506	-6.56623	5.16038e-11	1.50898e-09	126.485	84.5663	81.6757	84.5598	232.059	238.592	226.343	201.093
328	ENSECAG00000010380	25.596	-6.73004	1.02666	-6.55526	5.55444e-11	1.61925e-09	0	0.821032	0.859745	0	47.2557	46.3929	49.6851	59.7533
329	ENSECAG00000021773	31.0996	-2.25134	0.343711	-6.55009	5.7502e-11	1.66962e-09	7.44029	10.6734	12.8962	11.6634	52.3188	47.3397	66.2467	40.2186
330	ENSECAG00000023472	61.2777	1.90561	0.290942	6.54978	5.76212e-11	1.66962e-09	68.2027	125.618	106.608	86.5037	27.0033	32.191	17.6658	26.4294
331	ENSECAG00000011237	142.045	-1.16101	0.177495	-6.54107	6.10807e-11	1.76451e-09	106.644	74.7139	85.1147	86.5037	214.338	182.731	192.116	194.198
332	ENSECAG00000007522	46.4998	2.0272	0.310414	6.53062	6.54975e-11	1.88641e-09	54.5621	96.0607	62.7614	84.5598	13.5016	18.9359	22.0822	19.5347
333	ENSECAG00000021297	63.7225	-1.75163	0.268476	-6.52434	6.82995e-11	1.9612e-09	29.7612	22.1679	39.5482	25.2707	105.482	83.3179	120.348	83.8845
335	ENSECAG00000020280	525.264	1.15274	0.176891	6.51669	7.18747e-11	2.05154e-09	608.864	805.432	815.898	666.759	326.571	279.304	294.798	404.484
336	ENSECAG00000024644	113.087	-1.21375	0.186365	-6.51275	7.37871e-11	2.09986e-09	64.4825	78.819	55.8834	72.8964	153.581	151.487	167.825	159.725
337	ENSECAG00000011362	59.515	-1.73969	0.267158	-6.51182	7.42432e-11	2.10657e-09	26.041	21.3468	30.0911	32.0744	78.4783	82.3711	83.9125	121.805
338	ENSECAG00000022164	307.592	2.6939	0.413725	6.51134	7.44827e-11	2.10711e-09	252.97	908.882	410.958	558.872	68.352	153.381	45.2686	62.0515
339	ENSECAG00000005086	57.3481	-2.026	0.311212	-6.51001	7.5144e-11	2.11955e-09	23.5609	29.5571	23.2131	13.6073	59.0697	106.988	99.3701	103.419
340	ENSECAG00000023949	925.14	-1.06804	0.164133	-6.50714	7.65934e-11	2.15408e-09	651.026	484.409	689.515	565.676	1056.5	1337.82	1390.08	1226.09
341	ENSECAG00000038401	16.3653	-4.43697	0.682465	-6.50138	7.95854e-11	2.23166e-09	2.4801	0	0.859745	2.91585	32.0664	33.1378	35.3316	24.1312
342	ENSECAG00000020695	28.8786	2.37721	0.366092	6.49348	8.38771e-11	2.34513e-09	48.3619	34.4833	54.1639	56.3732	6.75082	9.46794	9.93701	11.491
343	ENSECAG00000002280	98.8713	1.33496	0.205614	6.49257	8.43862e-11	2.35248e-09	114.084	149.428	142.718	159.4	49.7873	58.7012	65.1426	51.7096
344	ENSECAG00000004556	58.1234	1.8834	0.290167	6.49074	8.54165e-11	2.37428e-09	91.7636	79.6401	90.2732	103.027	13.5016	22.7231	35.3316	28.7276
345	ENSECAG00000023646	115.466	-1.36541	0.2107	-6.48035	9.15073e-11	2.53621e-09	63.2425	67.3246	57.6029	69.9805	183.96	121.19	178.866	181.558
347	ENSECAG00000003260	98.5619	-2.22113	0.34309	-6.4739	9.55071e-11	2.63181e-09	12.4005	59.1143	39.5482	26.2427	141.767	177.05	162.305	170.067
348	ENSECAG00000000371	154.69	1.25595	0.194128	6.4697	9.81995e-11	2.69823e-09	217.009	169.954	223.534	261.455	81.0098	91.839	92.7454	99.9719
349	ENSECAG00000017793	20.1254	-5.79303	0.898381	-6.4483	1.1311e-10	3.09903e-09	0	0.821032	0	1.9439	27.8471	42.6057	45.2686	42.5168
350	ENSECAG00000000184	91.9616	-1.30708	0.203156	-6.43387	1.24396e-10	3.39535e-09	63.2425	47.6198	56.7431	44.7098	120.671	121.19	141.326	140.191
351	ENSECAG00000022703	17.2717	-4.53026	0.704158	-6.43358	1.24636e-10	3.39535e-09	1.24005	0.821032	1.71949	1.9439	17.7209	36.925	36.4357	41.3677
352	ENSECAG00000037060	56.3447	2.07216	0.322594	6.42344	1.33229e-10	3.61915e-09	91.7636	124.797	91.9927	55.4012	24.4717	15.1487	26.4987	20.6838
353	ENSECAG00000012368	35.4956	2.94352	0.458615	6.41827	1.3783e-10	3.73351e-09	26.041	65.6825	81.6757	77.7561	9.28237	7.57435	3.31234	12.6401
354	ENSECAG00000020015	160.349	1.53381	0.239136	6.41399	1.41763e-10	3.82921e-09	338.533	188.016	233.851	194.39	86.0729	94.6794	80.6002	66.6479
355	ENSECAG00000005083	36.7639	-2.36195	0.369034	-6.40036	1.55016e-10	4.17538e-09	11.1604	15.5996	9.45719	11.6634	95.3553	48.2865	48.5809	54.0078
356	ENSECAG00000016940	44.6447	2.75842	0.431752	6.3889	1.67085e-10	4.48784e-09	39.6816	82.9242	98.8706	89.4195	5.06311	20.8295	7.72879	12.6401
357	ENSECAG00000009157	291.312	-1.22465	0.191927	-6.38081	1.76152e-10	4.70494e-09	173.607	174.059	193.443	156.484	364.544	324.75	531.078	412.528
358	ENSECAG00000019737	24.2248	4.06334	0.63677	6.38118	1.75732e-10	4.70494e-09	79.3631	18.0627	43.847	41.7939	4.21926	0.946794	4.41645	1.1491
359	ENSECAG00000021393	113.093	-1.32625	0.208019	-6.37561	1.82239e-10	4.85118e-09	64.4825	83.7452	49.0054	60.261	157.8	152.434	161.2	175.813
360	ENSECAG00000034095	32.7217	-2.5281	0.396548	-6.37527	1.82642e-10	4.85118e-09	12.4005	4.92619	12.0364	9.71951	51.475	34.0846	75.0796	62.0515
361	ENSECAG00000015387	106.171	1.73034	0.271578	6.37144	1.87259e-10	4.96004e-09	100.444	153.533	212.357	186.615	58.2258	54.9141	43.0604	40.2186
362	ENSECAG00000033049	502.621	1.11322	0.174873	6.36589	1.94163e-10	5.12869e-09	766.35	520.534	717.027	746.459	290.285	339.899	357.732	282.679
363	ENSECAG00000011995	119.56	-1.51307	0.237741	-6.36438	1.96081e-10	5.16508e-09	63.2425	81.2821	45.5665	58.3171	210.963	199.774	147.951	149.383
364	ENSECAG00000000547	62.0182	1.68582	0.265081	6.35963	2.02238e-10	5.31264e-09	94.2437	81.2821	113.486	88.4476	20.2525	28.4038	29.811	40.2186
366	ENSECAG00000020716	337.863	1.30428	0.205523	6.34615	2.20775e-10	5.76789e-09	353.414	535.313	463.402	571.507	215.182	177.05	230.759	156.278
367	ENSECAG00000012473	24.4655	-2.58425	0.407397	-6.34331	2.24881e-10	5.85915e-09	4.96019	8.21032	10.3169	3.88781	36.2856	53.0205	34.2275	44.815
368	ENSECAG00000020129	51.5864	2.03396	0.320752	6.34121	2.27963e-10	5.92332e-09	114.084	94.4186	55.8834	67.0646	15.1893	19.8827	23.1864	22.9821
369	ENSECAG00000020320	39.6486	1.97638	0.312023	6.3341	2.38728e-10	6.18621e-09	53.3221	48.4409	76.5173	74.8403	16.877	17.9891	16.5617	12.6401
370	ENSECAG00000009436	91.9303	-1.55923	0.246419	-6.32755	2.49085e-10	6.43716e-09	42.1617	45.1567	61.0419	36.9342	109.701	121.19	145.743	173.514
371	ENSECAG00000014295	24.6799	-5.29158	0.837847	-6.31569	2.68953e-10	6.93188e-09	3.72015	0.821032	0	0.971951	95.3553	45.4461	14.3535	36.7713
372	ENSECAG00000018894	111.112	1.13282	0.179644	6.30589	2.8655e-10	7.36557e-09	167.407	145.323	151.315	146.765	65.8205	75.7435	61.8303	74.6917
373	ENSECAG00000014155	762.569	1.65529	0.262682	6.30148	2.94809e-10	7.55755e-09	1398.77	895.745	1471.88	864.065	245.561	510.322	379.815	334.389
374	ENSECAG00000021205	324.928	2.35231	0.373515	6.29776	3.0198e-10	7.72067e-09	1016.84	319.381	433.311	405.304	136.704	131.604	56.3097	99.9719
375	ENSECAG00000010516	111.123	1.34437	0.213534	6.29585	3.05725e-10	7.79559e-09	142.606	186.374	162.492	144.821	49.7873	60.5948	60.7262	81.5863
376	ENSECAG00000010689	140.037	1.29999	0.206856	6.28455	3.28812e-10	8.33979e-09	225.689	174.88	218.375	177.867	90.2922	61.5416	73.9755	97.6737
377	ENSECAG00000016697	44.4945	1.79896	0.286243	6.28473	3.28427e-10	8.33979e-09	68.2027	79.6401	58.4626	70.9525	22.784	25.5634	16.5617	13.7892
379	ENSECAG00000021002	940.742	1.02802	0.163888	6.27273	3.54782e-10	8.951e-09	1046.6	1438.45	1229.43	1333.52	526.564	671.277	564.201	715.891
380	ENSECAG00000012496	290.969	1.05692	0.16857	6.2699	3.61274e-10	9.0908e-09	432.777	426.936	351.636	362.538	216.87	208.295	167.825	160.874
381	ENSECAG00000000939	88.3894	1.4382	0.229567	6.26483	3.73241e-10	9.36728e-09	91.7636	127.26	147.876	148.709	45.568	44.4993	48.5809	52.8587
382	ENSECAG00000019565	69.4659	2.53179	0.4042	6.2637	3.75943e-10	9.41038e-09	55.8022	183.911	98.0109	135.101	10.9701	19.8827	19.874	32.1749
383	ENSECAG00000020575	553.564	1.00582	0.161042	6.24569	4.21923e-10	1.05338e-08	894.075	726.613	691.235	646.348	407.581	392.92	314.672	355.073
384	ENSECAG00000023180	408.075	1.28112	0.205161	6.24445	4.25284e-10	1.059e-08	691.947	613.311	478.018	528.742	167.083	250.9	247.321	287.276
385	ENSECAG00000019195	119.443	1.69662	0.272193	6.23313	4.57207e-10	1.13554e-08	131.445	157.638	210.637	229.381	34.5979	64.382	58.518	68.9462
386	ENSECAG00000010240	108.352	1.29974	0.208791	6.22506	4.81384e-10	1.19249e-08	132.685	166.669	167.65	147.737	48.9434	56.8076	75.0796	71.2444
387	ENSECAG00000000099	34.5116	-2.45443	0.394376	-6.22359	4.85909e-10	1.20058e-08	3.72015	14.7786	8.59745	14.5793	41.3488	76.6903	48.5809	67.797
388	ENSECAG00000032167	44.5991	2.18063	0.350803	6.2161	5.09659e-10	1.25602e-08	60.7624	93.5976	52.4444	85.5317	13.5016	20.8295	22.0822	8.04372
389	ENSECAG00000012252	52.5882	1.90399	0.306405	6.21396	5.16668e-10	1.27002e-08	68.2027	101.808	75.6575	85.5317	12.6578	29.3506	18.7699	28.7276
390	ENSECAG00000023457	10.2001	6.78844	1.09837	6.18044	6.39226e-10	1.56725e-08	19.8408	18.8837	21.4936	21.3829	0	0	0	0
391	ENSECAG00000014903	124.054	-1.38176	0.223884	-6.17177	6.75281e-10	1.65142e-08	62.0024	68.1456	72.2185	71.9244	140.923	165.689	165.617	245.908
392	ENSECAG00000023479	150.969	-1.19441	0.193574	-6.17029	6.81667e-10	1.66278e-08	81.8432	117.408	73.0783	94.2793	215.182	227.231	197.636	201.093
393	ENSECAG00000010808	42.0156	1.7722	0.287377	6.16679	6.96897e-10	1.69561e-08	55.8022	68.1456	58.4626	77.7561	21.9402	18.9359	13.2493	21.8329
394	ENSECAG00000037977	31.2805	2.28474	0.370803	6.16161	7.20077e-10	1.74756e-08	38.4415	66.5036	64.4808	37.9061	11.8139	8.52115	9.93701	12.6401
395	ENSECAG00000010542	30.7903	2.11831	0.343849	6.1606	7.24717e-10	1.75436e-08	49.6019	40.2305	56.7431	53.4573	7.59467	15.1487	14.3535	9.19282
396	ENSECAG00000018726	44.568	-1.65508	0.26894	-6.15408	7.55143e-10	1.8234e-08	26.041	22.1679	22.3534	15.5512	59.0697	68.1692	67.3508	75.8408
397	ENSECAG00000016926	28.7828	2.00952	0.327165	6.14222	8.13737e-10	1.95994e-08	40.9216	45.1567	52.4444	45.6817	10.9701	11.3615	9.93701	13.7892
398	ENSECAG00000023459	295.327	1.40185	0.228279	6.14097	8.20169e-10	1.97047e-08	383.175	348.938	557.114	423.771	163.707	116.456	154.576	214.882
399	ENSECAG00000015487	66.5658	1.42233	0.23165	6.14	8.25237e-10	1.97767e-08	83.0833	99.3448	110.907	93.3073	29.5348	34.0846	39.748	42.5168
400	ENSECAG00000010969	146.823	-1.12277	0.182947	-6.13713	8.40252e-10	2.00862e-08	95.4838	100.166	88.5537	85.5317	193.242	231.018	163.409	217.18
401	ENSECAG00000017188	173.127	1.09509	0.178527	6.13403	8.56792e-10	2.04305e-08	252.97	252.878	239.869	198.278	123.202	108.881	89.4331	119.507
403	ENSECAG00000012663	98.0578	-2.88394	0.470915	-6.12412	9.11867e-10	2.16359e-08	58.2823	7.38928	16.3351	13.6073	224.465	138.232	145.743	180.409
404	ENSECAG00000042372	89.4421	1.98009	0.323484	6.12112	9.29182e-10	2.19922e-08	85.5634	234.815	120.364	129.27	29.5348	35.9782	38.6439	41.3677
405	ENSECAG00000010867	179.144	1.18535	0.193789	6.11672	9.55218e-10	2.25526e-08	197.168	294.75	230.412	273.118	128.266	101.307	109.307	98.8228
406	ENSECAG00000008724	109.15	1.55002	0.253816	6.10688	1.016e-09	2.39285e-08	107.884	192.942	175.388	173.979	44.7242	71.0095	46.3727	60.9024
407	ENSECAG00000025178	243.943	1.39566	0.228638	6.10426	1.03276e-09	2.42636e-08	241.81	463.883	361.952	346.015	124.046	169.476	122.556	121.805
408	ENSECAG00000009313	50.8761	1.62333	0.266155	6.0992	1.06604e-09	2.4984e-08	65.7226	76.3559	85.9745	78.7281	27.8471	16.0955	28.7069	27.5785
409	ENSECAG00000004216	7752.49	-1.39854	0.229662	-6.08954	1.13233e-09	2.64728e-08	5999.36	3195.45	4390.72	3471.81	11029.1	8368.71	12985.5	12579.2
410	ENSECAG00000010710	77.6789	-1.35974	0.223375	-6.08725	1.14866e-09	2.67891e-08	50.842	43.5147	35.2495	45.6817	133.329	97.5198	102.682	112.612
411	ENSECAG00000013597	698.247	1.75597	0.288962	6.0768	1.22607e-09	2.85248e-08	1718.71	836.631	1010.2	745.487	426.989	262.262	234.072	351.625
412	ENSECAG00000009003	264.887	-1.16887	0.192476	-6.07281	1.25688e-09	2.91706e-08	130.205	181.448	183.985	154.54	307.162	332.325	372.086	457.343
413	ENSECAG00000020102	143.196	1.11825	0.184202	6.07079	1.27279e-09	2.93972e-08	213.288	189.658	193.443	187.587	78.4783	88.9986	114.828	79.2881
414	ENSECAG00000020805	184.602	-1.1038	0.181814	-6.07105	1.27078e-09	2.93972e-08	125.245	117.408	115.206	110.802	191.554	262.262	270.508	283.828
415	ENSECAG00000035205	20.6863	-3.58587	0.590775	-6.06977	1.2809e-09	2.95132e-08	7.44029	0.821032	4.29872	0.971951	62.4451	33.1378	26.4987	29.8767
416	ENSECAG00000022068	362.328	1.13152	0.186907	6.05391	1.41371e-09	3.2417e-08	601.424	486.872	460.823	443.21	291.129	219.656	192.116	203.391
418	ENSECAG00000010042	35.8183	1.9539	0.323288	6.04384	1.50492e-09	3.4426e-08	75.643	42.6936	58.4626	51.5134	15.1893	16.0955	15.4576	11.491
419	ENSECAG00000020619	29.1196	1.98274	0.328155	6.04207	1.52146e-09	3.47211e-08	52.082	48.4409	46.4262	38.8781	10.1262	12.3083	14.3535	10.3419
420	ENSECAG00000021652	390.5	-1.01024	0.167261	-6.0399	1.54207e-09	3.51078e-08	213.288	233.994	263.082	325.604	555.255	547.247	489.122	496.412
421	ENSECAG00000014244	37.9623	-2.05065	0.339639	-6.03774	1.5629e-09	3.54975e-08	19.8408	9.85238	14.6157	15.5512	70.8836	41.6589	77.2879	54.0078
422	ENSECAG00000024834	50.1153	1.69962	0.28223	6.02213	1.72138e-09	3.90044e-08	101.684	64.0405	61.0419	80.672	27.0033	23.6698	20.9781	21.8329
424	ENSECAG00000015069	55.3286	1.977	0.32909	6.00748	1.88427e-09	4.24939e-08	62.0024	116.586	63.6211	110.802	27.8471	19.8827	15.4576	26.4294
425	ENSECAG00000023740	143.259	-1.1368	0.189455	-6.00038	1.96857e-09	4.42905e-08	107.884	68.1456	97.1511	86.5037	194.086	193.146	215.302	183.856
426	ENSECAG00000008693	120.222	1.05999	0.177032	5.98758	2.12993e-09	4.78083e-08	168.647	170.775	143.577	167.176	83.5414	68.1692	80.6002	79.2881
427	ENSECAG00000011528	39.3436	-2.0615	0.344426	-5.98531	2.15973e-09	4.83638e-08	12.4005	23.8099	11.1767	12.6354	52.3188	51.1269	66.2467	85.0336
428	ENSECAG00000016044	27.5414	2.09485	0.35011	5.98341	2.18514e-09	4.88185e-08	34.7214	51.725	49.8652	41.7939	10.9701	7.57435	11.0411	12.6401
429	ENSECAG00000016814	112.227	1.08076	0.180814	5.97719	2.27026e-09	5.06019e-08	153.766	139.575	159.053	156.484	65.8205	64.382	80.6002	78.139
430	ENSECAG00000002225	18.6362	5.59843	0.938282	5.96668	2.42132e-09	5.36098e-08	57.0422	18.0627	36.969	34.0183	0	1.89359	1.10411	0
431	ENSECAG00000009074	20.3845	2.62755	0.440349	5.96698	2.41686e-09	5.36098e-08	42.1617	28.7361	37.8288	32.0744	8.43852	4.73397	2.20822	6.89462
433	ENSECAG00000017082	78.16	1.22865	0.205947	5.96588	2.43315e-09	5.37315e-08	116.565	97.7028	120.364	103.999	48.0996	46.3929	50.7892	41.3677
434	ENSECAG00000010791	135.051	-2.41593	0.405093	-5.9639	2.46289e-09	5.4263e-08	53.3221	59.1143	28.3716	30.1305	312.225	356.941	109.307	130.998
435	ENSECAG00000021299	114.197	1.14208	0.191614	5.96034	2.5171e-09	5.53299e-08	128.965	155.175	159.912	184.671	75.9467	73.8499	69.5591	65.4988
436	ENSECAG00000018063	23.5879	2.14726	0.361271	5.94362	2.78799e-09	6.11439e-08	40.9216	36.9464	41.2677	34.9902	10.1262	7.57435	8.8329	8.04372
437	ENSECAG00000012743	66.7508	1.88363	0.317048	5.94116	2.83004e-09	6.19241e-08	50.842	132.186	115.206	121.494	30.3787	26.5102	29.811	27.5785
438	ENSECAG00000023308	492.43	2.40444	0.405538	5.92901	3.04776e-09	6.65357e-08	1692.67	306.245	788.386	526.798	186.491	134.445	143.535	160.874
439	ENSECAG00000020388	96.9456	1.77838	0.300016	5.92763	3.07331e-09	6.69407e-08	226.929	132.186	141.858	100.111	52.3188	31.2442	52.9974	37.9204
441	ENSECAG00000020284	34.2577	1.84122	0.311426	5.91221	3.37542e-09	7.31876e-08	62.0024	59.1143	52.4444	40.822	13.5016	17.9891	13.2493	14.9383
442	ENSECAG00000038860	29.6001	-2.403	0.406697	-5.90857	3.45097e-09	7.46565e-08	13.6405	5.74722	12.8962	5.83171	38.8172	50.1801	71.7673	37.9204
443	ENSECAG00000017606	40.4203	-2.05281	0.347472	-5.90786	3.46585e-09	7.48092e-08	6.20024	23.8099	20.6339	10.6915	68.352	71.9563	58.518	63.2006
444	ENSECAG00000006636	12.8391	-6.44817	1.09262	-5.90155	3.60112e-09	7.75539e-08	0	0	0	0.971951	21.9402	29.3506	30.9151	19.5347
445	ENSECAG00000007426	74.905	-1.24137	0.210475	-5.89794	3.68072e-09	7.90899e-08	49.6019	41.8726	43.847	43.7378	117.295	113.615	92.7454	96.5246
446	ENSECAG00000000485	111.47	1.30459	0.221441	5.89137	3.83011e-09	8.21155e-08	187.247	188.837	126.382	133.157	73.4151	63.4352	61.8303	57.4551
447	ENSECAG00000011309	80.2853	1.26118	0.214121	5.89004	3.8611e-09	8.25947e-08	112.844	103.45	116.066	120.522	50.6311	35.0314	48.5809	55.1569
448	ENSECAG00000000711	78.7664	1.3572	0.23062	5.88498	3.98103e-09	8.49702e-08	112.844	124.797	91.9927	123.438	35.4418	53.9673	48.5809	39.0695
449	ENSECAG00000008426	262.549	2.23016	0.379298	5.8797	4.1101e-09	8.74024e-08	246.77	378.496	502.091	602.61	52.3188	48.2865	118.14	151.682
450	ENSECAG00000008427	21.3909	2.67271	0.454576	5.87957	4.11327e-09	8.74024e-08	49.6019	45.1567	25.7923	27.2146	5.06311	4.73397	5.52056	8.04372
451	ENSECAG00000000037	80.7194	1.35667	0.230871	5.87632	4.19483e-09	8.89378e-08	121.525	94.4186	138.419	109.831	37.1295	53.0205	40.8522	50.5605
452	ENSECAG00000006136	22.4405	-2.79948	0.476654	-5.87319	4.2749e-09	9.0435e-08	12.4005	3.28413	6.87796	0.971951	41.3488	41.6589	41.9563	31.0258
453	ENSECAG00000020694	85.1022	-1.31939	0.224673	-5.87251	4.29234e-09	9.06035e-08	44.6418	43.5147	44.7067	62.2049	131.641	131.604	94.9537	127.55
454	ENSECAG00000014036	35.4157	-2.06688	0.352449	-5.86433	4.50949e-09	9.49773e-08	16.1206	9.85238	13.7559	15.5512	80.166	49.2333	60.7262	37.9204
455	ENSECAG00000017574	54.8224	-1.42497	0.243207	-5.8591	4.65385e-09	9.78024e-08	28.5211	29.5571	25.7923	34.9902	76.7905	67.2224	87.2249	88.4809
456	ENSECAG00000008892	194.359	-1.11918	0.191089	-5.85685	4.71725e-09	9.89174e-08	104.164	117.408	137.559	130.241	312.225	204.508	266.091	282.679
457	ENSECAG00000002072	42.3101	1.98649	0.339206	5.85629	4.73309e-09	9.90323e-08	60.7624	68.9667	49.8652	90.3915	16.0332	16.0955	9.93701	26.4294
458	ENSECAG00000000072	19.1878	-3.43979	0.587845	-5.85153	4.87073e-09	1.0169e-07	0	6.56825	0	5.83171	38.8172	24.6166	39.748	37.9204
459	ENSECAG00000028689	253.219	-1.09409	0.187023	-5.85003	4.91476e-09	1.02386e-07	128.965	175.701	183.126	156.484	347.667	269.836	370.982	392.993
460	ENSECAG00000018119	51.7475	-1.50061	0.256839	-5.84261	5.13881e-09	1.0682e-07	18.6007	30.3782	32.6703	25.2707	70.8836	83.3179	83.9125	68.9462
462	ENSECAG00000010836	49.8003	1.51238	0.259387	5.83058	5.52355e-09	1.14321e-07	70.6828	69.7877	82.5355	71.9244	29.5348	18.9359	32.0193	22.9821
463	ENSECAG00000014260	19.3455	-2.81539	0.484155	-5.81507	6.061e-09	1.25173e-07	7.44029	1.64206	7.7377	2.91585	41.3488	27.457	38.6439	27.5785
464	ENSECAG00000018336	122.803	1.37879	0.237784	5.79851	6.6905e-09	1.37876e-07	204.608	142.038	176.248	185.643	47.2557	58.7012	80.6002	87.3318
465	ENSECAG00000007612	13.2926	-3.90723	0.674264	-5.7948	6.84011e-09	1.40656e-07	2.4801	1.64206	1.71949	0.971951	27.0033	34.0846	15.4576	22.9821
467	ENSECAG00000009606	111.624	1.18683	0.205298	5.78099	7.42643e-09	1.52059e-07	141.366	153.533	166.79	158.428	79.3221	50.1801	62.9344	80.4372
468	ENSECAG00000010085	766.81	1.16341	0.201506	5.77356	7.76144e-09	1.58579e-07	1395.05	899.03	1079.84	868.925	586.477	446.887	397.48	460.79
469	ENSECAG00000011790	208.671	1.39989	0.242626	5.76974	7.93934e-09	1.61868e-07	215.768	308.708	385.166	299.361	76.7905	119.296	141.326	122.954
470	ENSECAG00000015835	77.8666	1.5786	0.273685	5.76793	8.02513e-09	1.63269e-07	81.8432	165.027	103.169	116.634	43.0365	43.5525	38.6439	31.0258
471	ENSECAG00000010227	170.935	-1.09491	0.190384	-5.75103	8.86993e-09	1.80073e-07	105.404	96.0607	111.767	122.466	176.365	256.581	250.633	248.206
472	ENSECAG00000007599	34.3374	1.93933	0.337286	5.7498	8.9348e-09	1.81005e-07	50.842	56.6512	55.8834	54.4293	8.43852	23.6698	12.1452	12.6401
473	ENSECAG00000011023	65.5982	2.27863	0.396832	5.74205	9.35377e-09	1.89093e-07	49.6019	96.8817	133.26	154.54	15.1893	20.8295	16.5617	37.9204
474	ENSECAG00000012220	153.899	-1.26532	0.220381	-5.7415	9.3841e-09	1.89305e-07	131.445	70.6087	85.1147	76.7842	227.84	199.774	237.384	202.242
475	ENSECAG00000013303	27.961	2.55575	0.44651	5.72384	1.04141e-08	2.09642e-07	35.9614	52.546	55.8834	47.6256	11.8139	14.2019	2.20822	3.44731
478	ENSECAG00000000319	1930.9	-1.5746	0.275432	-5.71683	1.08528e-08	2.16712e-07	765.11	834.168	1281.02	1001.11	2037.9	1886.96	3878.75	3762.16
479	ENSECAG00000015692	18.9718	3.50176	0.612578	5.71643	1.08786e-08	2.16712e-07	16.1206	31.1992	36.1093	55.4012	0.843852	1.89359	3.31234	6.89462
480	ENSECAG00000035110	69.9229	1.3717	0.239949	5.71662	1.08666e-08	2.16712e-07	131.445	89.4924	93.7122	89.4195	39.6611	38.8186	32.0193	44.815
481	ENSECAG00000015720	45.41	-1.5323	0.268079	-5.71587	1.09143e-08	2.1697e-07	23.5609	16.4206	29.2313	24.2988	71.7274	60.5948	67.3508	70.0953
482	ENSECAG00000018603	20.4699	-2.76286	0.483496	-5.71433	1.10134e-08	2.18486e-07	3.72015	3.28413	5.15847	8.74756	28.691	21.7763	45.2686	47.1132
483	ENSECAG00000015510	65.563	8.74731	1.53119	5.71274	1.11169e-08	2.19627e-07	348.454	16.4206	102.31	56.3732	0	0.946794	0	0
484	ENSECAG00000021001	44.1486	1.62104	0.283756	5.71279	1.11139e-08	2.19627e-07	76.883	65.6825	61.0419	63.1768	27.0033	14.2019	18.7699	26.4294
485	ENSECAG00000009134	188.256	1.37309	0.240407	5.71151	1.11975e-08	2.20765e-07	218.249	304.603	326.703	235.212	78.4783	91.839	101.578	149.383
486	ENSECAG00000029844	124.734	1.0527	0.184434	5.70771	1.14505e-08	2.25287e-07	173.607	184.732	163.351	150.652	72.5713	75.7435	78.392	98.8228
487	ENSECAG00000019676	132.407	1.24334	0.218108	5.70057	1.19405e-08	2.34445e-07	234.369	158.459	182.266	171.063	89.4483	88.0518	56.3097	79.2881
488	ENSECAG00000023455	121.353	1.51118	0.265143	5.69949	1.20166e-08	2.35456e-07	143.846	142.038	251.045	180.783	60.7574	43.5525	70.6632	78.139
489	ENSECAG00000003045	26.2548	2.73521	0.479976	5.69864	1.20767e-08	2.36151e-07	68.2027	54.1881	33.53	27.2146	10.9701	5.68076	2.20822	8.04372
490	ENSECAG00000011179	58.0717	-1.35433	0.237907	-5.69269	1.25053e-08	2.44032e-07	42.1617	31.1992	30.9508	27.2146	76.7905	92.7858	77.2879	86.1827
491	ENSECAG00000005359	18.5207	2.70206	0.474743	5.69162	1.25841e-08	2.45071e-07	35.9614	44.3357	24.0728	24.2988	5.90697	5.68076	3.31234	4.59641
492	ENSECAG00000012844	92.4824	1.21382	0.213628	5.68191	1.33201e-08	2.58876e-07	138.885	149.428	127.242	101.083	55.6942	48.2865	62.9344	56.306
493	ENSECAG00000014058	165.339	-1.10186	0.194409	-5.66774	1.44696e-08	2.80646e-07	91.7636	123.976	107.468	96.2232	259.063	184.625	255.05	204.54
494	ENSECAG00000023496	41.2794	3.45739	0.610323	5.66485	1.47153e-08	2.84833e-07	8.68034	77.177	88.5537	128.298	8.43852	6.62756	4.41645	8.04372
495	ENSECAG00000010880	19.3046	2.68843	0.475246	5.65691	1.54119e-08	2.97714e-07	22.3209	28.7361	44.7067	37.9061	6.75082	2.84038	7.72879	3.44731
496	ENSECAG00000037175	72.5452	1.28618	0.227381	5.65651	1.54482e-08	2.97814e-07	86.8034	116.586	109.188	98.1671	37.1295	45.4461	35.3316	51.7096
498	ENSECAG00000030455	17.8023	2.60136	0.460155	5.65322	1.57468e-08	3.0291e-07	33.4813	27.094	27.5118	34.0183	2.53156	7.57435	3.31234	6.89462
499	ENSECAG00000014752	81.504	1.1973	0.211989	5.64793	1.62392e-08	3.11181e-07	99.2039	107.555	134.12	112.746	45.568	53.9673	55.2056	43.6659
500	ENSECAG00000013654	71.1972	1.51971	0.269421	5.64065	1.69414e-08	3.23987e-07	115.325	67.3246	124.663	114.69	29.5348	36.925	39.748	41.3677
501	ENSECAG00000014291	179.53	1.0564	0.187427	5.63634	1.73702e-08	3.31525e-07	233.129	303.782	213.217	218.689	105.482	112.668	114.828	134.445
502	ENSECAG00000013331	155.314	1.07073	0.189994	5.6356	1.74452e-08	3.32292e-07	194.688	207.721	226.973	210.913	74.259	107.935	99.3701	120.656
503	ENSECAG00000022984	57.1954	2.05154	0.364349	5.6307	1.79475e-08	3.41182e-07	121.525	47.6198	118.645	80.672	22.784	13.2551	23.1864	29.8767
504	ENSECAG00000031913	208.479	-1.27801	0.22725	-5.6238	1.86801e-08	3.54403e-07	73.1629	160.101	128.962	122.466	278.471	302.027	269.403	333.24
505	ENSECAG00000005844	13.1888	-5.18429	0.922685	-5.61869	1.92408e-08	3.64318e-07	0	0.821032	1.71949	0	25.3156	18.9359	25.3946	33.324
506	ENSECAG00000020103	619.705	1.35315	0.24095	5.61589	1.95549e-08	3.69534e-07	518.34	1050.1	874.36	1119.69	326.571	409.962	362.149	296.468
507	ENSECAG00000009616	154.921	1.82101	0.324368	5.61402	1.97681e-08	3.72825e-07	193.448	316.097	208.918	248.82	119.827	64.382	43.0604	44.815
509	ENSECAG00000004558	98.7629	1.07667	0.192108	5.6045	2.08857e-08	3.92356e-07	133.925	133.007	124.663	144.821	62.4451	73.8499	51.8933	65.4988
510	ENSECAG00000015983	67.3995	1.30159	0.232516	5.59785	2.17032e-08	4.06915e-07	109.124	104.271	75.6575	95.2512	43.8803	38.8186	33.1234	39.0695
511	ENSECAG00000012230	36.9713	1.73228	0.30989	5.58997	2.27113e-08	4.23327e-07	55.8022	45.1567	54.1639	71.9244	14.3455	17.0423	14.3535	22.9821
512	ENSECAG00000020678	61.9017	1.52935	0.273563	5.59051	2.26409e-08	4.23327e-07	62.0024	110.839	107.468	87.4756	38.8172	32.191	25.3946	31.0258
513	ENSECAG00000024766	65.7836	1.54811	0.276945	5.58997	2.27114e-08	4.23327e-07	100.444	77.177	130.681	83.5878	36.2856	22.7231	39.748	35.6222
514	ENSECAG00000002520	19.932	-2.20351	0.394393	-5.58711	2.30885e-08	4.29519e-07	7.44029	5.74722	9.45719	5.83171	36.2856	29.3506	32.0193	33.324
515	ENSECAG00000018267	65.269	1.44826	0.259697	5.57676	2.45044e-08	4.54973e-07	71.9228	88.6714	98.8706	122.466	30.3787	44.4993	32.0193	33.324
516	ENSECAG00000010678	18.8633	-2.35752	0.422937	-5.57417	2.48718e-08	4.60725e-07	4.96019	4.10516	7.7377	7.77561	29.5348	36.925	25.3946	34.4731
517	ENSECAG00000013952	27.2818	-3.04037	0.545467	-5.57389	2.49106e-08	4.60725e-07	4.96019	3.28413	10.3169	4.85976	22.784	32.191	92.7454	47.1132
518	ENSECAG00000015177	72.2886	-1.44221	0.258945	-5.56955	2.55396e-08	4.71448e-07	47.1219	49.2619	24.9326	34.9902	124.89	103.201	91.6413	102.27
519	ENSECAG00000008221	2069.6	-1.2351	0.221912	-5.56572	2.61075e-08	4.81001e-07	1006.92	1570.63	1190.75	1166.34	2104.57	2972.93	2582.52	3962.11
521	ENSECAG00000018055	14.5334	-3.71014	0.667846	-5.55538	2.77009e-08	5.084e-07	0	5.74722	0.859745	0.971951	16.877	33.1378	26.4987	32.1749
522	ENSECAG00000010655	59.3349	1.33249	0.239942	5.55338	2.80206e-08	5.13281e-07	105.404	78.819	85.9745	69.9805	32.9102	34.0846	35.3316	32.1749
523	ENSECAG00000020051	17.7049	-2.64762	0.477293	-5.54716	2.90343e-08	5.30833e-07	3.72015	6.56825	7.7377	0.971951	36.2856	25.5634	30.9151	29.8767
524	ENSECAG00000008932	19.8042	2.40885	0.434296	5.54656	2.91345e-08	5.31649e-07	28.5211	30.3782	43.847	30.1305	5.90697	3.78718	5.52056	10.3419
525	ENSECAG00000019069	322.287	1.29344	0.233239	5.54553	2.93064e-08	5.33768e-07	672.106	433.505	399.781	326.576	167.083	213.029	177.762	188.453
526	ENSECAG00000020098	101.561	-1.13717	0.205197	-5.54185	2.99291e-08	5.44073e-07	68.2027	55.8301	71.3588	59.289	171.302	124.03	129.181	133.296
527	ENSECAG00000014972	21.8786	2.21641	0.400093	5.53975	3.02909e-08	5.49605e-07	44.6418	36.1254	27.5118	35.9622	5.90697	11.3615	6.62467	6.89462
528	ENSECAG00000014565	16.5161	2.96457	0.535212	5.53905	3.04123e-08	5.50763e-07	18.6007	26.273	36.969	34.9902	3.37541	1.89359	7.72879	2.29821
529	ENSECAG00000011198	201.729	-1.19825	0.216604	-5.53196	3.16681e-08	5.7242e-07	86.8034	154.354	113.486	133.157	237.966	246.166	321.297	320.6
530	ENSECAG00000017195	31.8465	1.75119	0.31666	5.5302	3.19868e-08	5.7709e-07	54.5621	45.1567	52.4444	44.7098	19.4086	11.3615	11.0411	16.0874
531	ENSECAG00000021720	99.0144	-1.06028	0.191867	-5.52614	3.27358e-08	5.89492e-07	73.1629	68.9667	61.9016	53.4573	146.83	133.498	132.493	121.805
532	ENSECAG00000023979	7.32826	-6.36933	1.15408	-5.51899	3.40961e-08	6.12832e-07	0	0	0	0	14.3455	11.3615	9.93701	22.9821
534	ENSECAG00000038536	1072.53	1.8783	0.341214	5.50475	3.69683e-08	6.61967e-07	593.983	2366.21	1689.4	2095.53	507.155	451.621	348.899	527.438
536	ENSECAG00000006500	15.0003	3.6122	0.657465	5.49413	3.92646e-08	7.00462e-07	22.3209	14.7786	39.5482	34.0183	2.53156	0	2.20822	4.59641
537	ENSECAG00000030299	6.7565	-6.255	1.13872	-5.49299	3.95195e-08	7.03698e-07	0	0	0	0	14.3455	10.4147	14.3535	14.9383
538	ENSECAG00000017830	80.1902	1.11507	0.203075	5.4909	3.99884e-08	7.09405e-07	112.844	96.0607	109.188	120.522	47.2557	46.3929	54.1015	55.1569
539	ENSECAG00000017891	77.5197	1.94572	0.354333	5.49122	3.99168e-08	7.09405e-07	99.2039	138.754	110.907	144.821	56.5381	35.0314	17.6658	17.2365
540	ENSECAG00000017556	88.5111	-1.28103	0.233524	-5.48567	4.11902e-08	7.29372e-07	35.9614	59.1143	47.286	63.1768	120.671	153.381	117.036	111.463
541	ENSECAG00000007470	143.738	2.49487	0.454834	5.48523	4.12934e-08	7.29847e-07	85.5634	385.885	215.796	289.642	35.4418	83.3179	22.0822	32.1749
542	ENSECAG00000035192	28.0321	2.1324	0.388866	5.48363	4.16677e-08	7.35105e-07	37.2015	36.1254	56.7431	52.4854	14.3455	4.73397	8.8329	13.7892
543	ENSECAG00000010225	147.193	1.50656	0.274954	5.47932	4.26956e-08	7.51851e-07	145.086	188.837	226.973	309.081	63.2889	70.0628	67.3508	106.867
544	ENSECAG00000009170	129.354	1.38843	0.253459	5.47793	4.30335e-08	7.56409e-07	202.128	143.681	195.162	207.026	48.0996	75.7435	60.7262	102.27
547	ENSECAG00000027668	46.9479	-2.38692	0.436703	-5.46577	4.60908e-08	8.05705e-07	11.1604	17.2417	12.0364	19.439	48.9434	50.1801	155.68	60.9024
548	ENSECAG00000012900	168.275	1.30476	0.23902	5.4588	4.79364e-08	8.36428e-07	178.567	315.276	185.705	278.95	111.388	104.147	89.4331	82.7354
549	ENSECAG00000023985	27.9496	-1.83276	0.335763	-5.45848	4.80233e-08	8.36428e-07	9.92039	9.85238	17.1949	11.6634	39.6611	45.4461	50.7892	39.0695
551	ENSECAG00000019508	1460.97	1.75999	0.323367	5.44269	5.24807e-08	9.10745e-07	1877.43	3353.91	2100.36	1692.17	549.348	1149.41	397.48	567.657
552	ENSECAG00000001926	44.0659	-1.73921	0.319718	-5.43982	5.33332e-08	9.23862e-07	12.4005	19.7048	32.6703	15.5512	82.6975	64.382	59.6221	65.4988
553	ENSECAG00000008041	18.6765	2.27903	0.41924	5.43611	5.44567e-08	9.39865e-07	24.801	31.1992	36.969	31.1024	8.43852	5.68076	6.62467	4.59641
554	ENSECAG00000012968	44.5605	1.5118	0.27813	5.4356	5.46129e-08	9.39865e-07	69.4427	71.4297	66.2003	56.3732	16.0332	26.5102	29.811	20.6838
555	ENSECAG00000014262	28.8161	1.79077	0.32946	5.43548	5.46501e-08	9.39865e-07	35.9614	41.0516	55.8834	45.6817	11.8139	14.2019	12.1452	13.7892
556	ENSECAG00000017120	325.379	-1.10085	0.20253	-5.43548	5.46498e-08	9.39865e-07	283.971	191.3	204.619	149.681	438.803	442.153	488.018	404.484
557	ENSECAG00000017103	20.5008	3.46024	0.636713	5.43454	5.49367e-08	9.43096e-07	12.4005	61.5774	31.8105	44.7098	2.53156	7.57435	1.10411	2.29821
558	ENSECAG00000010715	89.9177	1.45411	0.267634	5.43318	5.53572e-08	9.48612e-07	96.7238	159.28	119.504	150.652	52.3188	29.3506	55.2056	56.306
561	ENSECAG00000000879	51.7035	1.42664	0.263293	5.41844	6.01211e-08	1.02474e-06	74.4029	63.2194	95.4316	68.0366	26.1594	26.5102	25.3946	34.4731
562	ENSECAG00000019321	28.0266	1.80173	0.333075	5.40937	6.32462e-08	1.07609e-06	44.6418	46.7988	37.8288	45.6817	16.877	13.2551	9.93701	9.19282
564	ENSECAG00000013193	69.3976	2.31725	0.428924	5.40247	6.573e-08	1.11438e-06	38.4415	188.016	125.523	109.831	13.5016	30.2974	24.2905	25.2803
566	ENSECAG00000019772	155.956	-1.02929	0.190854	-5.39309	6.9257e-08	1.17003e-06	95.4838	116.586	99.7304	97.1951	184.804	173.263	247.321	233.268
569	ENSECAG00000008923	31914.1	1.14833	0.213521	5.37807	7.52876e-08	1.26298e-06	63290.8	36150	36177.2	40321.4	16983.4	21584.1	22926.9	17878.9
570	ENSECAG00000021113	12.754	-5.70385	1.06051	-5.37839	7.51566e-08	1.26298e-06	0	0	0.859745	0.971951	23.6279	17.9891	28.7069	29.8767
572	ENSECAG00000038761	128.051	-1.27277	0.237272	-5.36417	8.13202e-08	1.35941e-06	60.7624	64.0405	99.7304	74.8403	235.435	144.859	168.929	175.813
573	ENSECAG00000015900	60.8288	-1.71495	0.319759	-5.36325	8.17361e-08	1.36398e-06	18.6007	35.3044	26.6521	32.0744	97.8869	57.7544	83.9125	134.445
574	ENSECAG00000018485	206.507	1.16639	0.217717	5.3574	8.44291e-08	1.40646e-06	282.731	215.11	367.971	276.034	99.5746	122.136	139.118	149.383
575	ENSECAG00000000591	13.0655	3.20979	0.599265	5.35621	8.49878e-08	1.41331e-06	22.3209	17.2417	23.2131	31.1024	0.843852	1.89359	3.31234	4.59641
576	ENSECAG00000007794	64.1642	-1.41975	0.265304	-5.35141	8.72722e-08	1.44627e-06	44.6418	31.1992	43.847	20.411	89.4483	88.0518	103.787	91.9282
577	ENSECAG00000022504	78.9326	1.31249	0.245254	5.35157	8.71928e-08	1.44627e-06	91.7636	135.47	103.169	119.55	49.7873	44.4993	30.9151	56.306
578	ENSECAG00000016401	88.0297	-1.11908	0.209163	-5.35026	8.78262e-08	1.45042e-06	62.0024	50.0829	55.0237	55.4012	100.418	136.338	135.806	109.165
579	ENSECAG00000035649	61.1084	-1.36125	0.254424	-5.35031	8.78024e-08	1.45042e-06	29.7612	31.1992	30.9508	44.7098	83.5414	68.1692	98.266	102.27
580	ENSECAG00000013348	69.4588	-1.64096	0.307155	-5.34245	9.17011e-08	1.5118e-06	21.0808	21.3468	47.286	44.7098	129.953	92.7858	91.6413	106.867
581	ENSECAG00000009114	120.944	-1.12825	0.211249	-5.34084	9.25165e-08	1.52262e-06	74.4029	93.5976	71.3588	64.1488	194.086	153.381	183.283	133.296
583	ENSECAG00000021473	130.472	1.34742	0.252639	5.33339	9.63971e-08	1.58104e-06	226.929	240.562	147.016	135.101	66.6643	87.105	79.4961	60.9024
584	ENSECAG00000000497	137.771	1.20218	0.225469	5.33191	9.71835e-08	1.59121e-06	152.526	244.667	172.809	197.306	81.8537	77.6371	67.3508	108.016
585	ENSECAG00000019125	51.7808	1.84287	0.345928	5.32732	9.9674e-08	1.629e-06	57.0422	113.302	80.816	72.8964	18.5647	37.8718	17.6658	16.0874
586	ENSECAG00000033728	40.4929	-1.58326	0.297212	-5.32703	9.9832e-08	1.629e-06	26.041	14.7786	21.4936	19.439	64.9766	44.4993	70.6632	62.0515
588	ENSECAG00000028686	116.013	-1.14762	0.215581	-5.32339	1.01853e-07	1.65633e-06	52.082	69.7877	86.8342	78.7281	183.116	130.658	155.68	171.216
589	ENSECAG00000003445	27.205	-2.64858	0.497985	-5.3186	1.04569e-07	1.69761e-06	9.92039	5.74722	5.15847	9.71951	91.136	35.0314	27.6028	33.324
590	ENSECAG00000018218	15.0913	3.09436	0.582115	5.31573	1.06231e-07	1.72166e-06	18.6007	22.1679	32.6703	34.9902	3.37541	6.62756	0	2.29821
592	ENSECAG00000031152	42.0806	1.59231	0.299808	5.3111	1.08965e-07	1.76e-06	52.082	73.8928	55.8834	69.9805	17.7209	14.2019	27.6028	25.2803
593	ENSECAG00000022217	40.9091	-1.60289	0.301902	-5.3093	1.10044e-07	1.77444e-06	24.801	20.5258	19.7741	16.5232	76.7905	51.1269	71.7673	45.9641
594	ENSECAG00000009419	9.62034	-6.03818	1.14001	-5.29659	1.17988e-07	1.89933e-06	0	0	0.859745	0	30.3787	13.2551	20.9781	11.491
596	ENSECAG00000018114	46.133	1.45394	0.274857	5.28979	1.22454e-07	1.9646e-06	53.3221	82.9242	60.1821	73.8683	27.8471	24.6166	19.874	26.4294
597	ENSECAG00000024622	103.679	1.46156	0.276362	5.28856	1.23284e-07	1.9746e-06	163.686	137.112	166.79	140.933	70.0397	34.0846	38.6439	78.139
598	ENSECAG00000007419	30.5023	-1.91058	0.361325	-5.28771	1.23859e-07	1.98051e-06	8.68034	12.3155	18.0546	11.6634	40.5049	65.3288	52.9974	34.4731
601	ENSECAG00000023223	53.7434	-1.45661	0.275829	-5.28083	1.28597e-07	2.046e-06	18.6007	27.094	38.6885	29.1585	69.1959	67.2224	94.9537	85.0336
605	ENSECAG00000023805	47.6911	-1.54874	0.293834	-5.2708	1.35831e-07	2.14681e-06	35.9614	17.2417	27.5118	17.4951	60.7574	71.9563	82.8084	67.797
606	ENSECAG00000001667	27.4385	-1.78062	0.338144	-5.26587	1.39527e-07	2.20157e-06	13.6405	13.9575	9.45719	12.6354	40.5049	50.1801	32.0193	47.1132
607	ENSECAG00000005573	154.777	-1.27554	0.242266	-5.26503	1.40169e-07	2.20806e-06	95.4838	92.7766	102.31	71.9244	286.91	249.007	149.055	190.751
608	ENSECAG00000019491	36.2951	-1.66566	0.316497	-5.26281	1.41871e-07	2.23121e-06	19.8408	13.1365	14.6157	22.3549	47.2557	44.4993	57.4138	71.2444
609	ENSECAG00000007210	10.793	-3.83297	0.728796	-5.25932	1.44589e-07	2.27021e-06	1.24005	1.64206	0.859745	1.9439	28.691	16.0955	22.0822	13.7892
610	ENSECAG00000012064	271.135	1.28388	0.244195	5.2576	1.45946e-07	2.28776e-06	336.053	293.929	513.268	393.64	152.737	118.349	218.614	142.489
613	ENSECAG00000022448	493.579	1.27885	0.243682	5.24803	1.53731e-07	2.398e-06	425.337	830.884	723.045	815.467	272.564	215.869	306.943	358.52
614	ENSECAG00000020945	141.69	-1.91716	0.365539	-5.24475	1.56491e-07	2.43708e-06	19.8408	76.3559	61.9016	77.7561	135.86	273.623	202.053	286.127
615	ENSECAG00000020885	137.155	1.09361	0.208603	5.24253	1.58386e-07	2.46259e-06	182.287	228.247	154.754	182.727	108.857	85.2115	83.9125	71.2444
616	ENSECAG00000016276	75.0692	1.35056	0.257676	5.24132	1.59432e-07	2.47482e-06	83.0833	139.575	104.029	104.971	54.0065	42.6057	30.9151	41.3677
618	ENSECAG00000020867	40.9793	1.73478	0.331316	5.23602	1.6408e-07	2.53873e-06	57.0422	87.8504	52.4444	55.4012	27.0033	18.9359	17.6658	11.491
619	ENSECAG00000042356	2599.62	1.28687	0.245942	5.23244	1.67288e-07	2.58419e-06	3024.48	4171.66	4034.78	3519.44	1082.66	1921.99	1036.76	2005.18
620	ENSECAG00000019382	369.045	-1.45454	0.278279	-5.22691	1.72369e-07	2.65838e-06	183.527	326.771	140.998	137.045	571.288	429.844	564.201	598.682
621	ENSECAG00000017689	65.0688	1.82491	0.349251	5.22523	1.73943e-07	2.67834e-06	50.842	87.0293	127.242	139.961	19.4086	27.457	36.4357	32.1749
622	ENSECAG00000010292	37.9315	-1.61128	0.308558	-5.22197	1.7703e-07	2.72149e-06	21.0808	23.8099	13.7559	16.5232	61.6012	70.0628	54.1015	42.5168
623	ENSECAG00000020814	52.435	-1.25195	0.239838	-5.22	1.78919e-07	2.74611e-06	28.5211	28.7361	31.8105	34.9902	71.7274	86.1583	65.1426	72.3935
624	ENSECAG00000014984	1253.45	1.09753	0.210353	5.21753	1.81322e-07	2.77853e-06	1349.17	1752.9	2029.86	1699.94	614.324	654.235	1040.07	887.107
625	ENSECAG00000024124	37.4031	1.60208	0.307166	5.2157	1.83129e-07	2.80173e-06	57.0422	50.904	61.9016	54.4293	10.9701	19.8827	17.6658	26.4294
627	ENSECAG00000011767	28.9087	-1.75611	0.337001	-5.21101	1.87819e-07	2.86431e-06	14.8806	9.03135	14.6157	14.5793	39.6611	39.7653	58.518	40.2186
628	ENSECAG00000003312	96.4477	-1.2563	0.241129	-5.21006	1.88775e-07	2.87431e-06	62.0024	45.9778	61.9016	58.3171	164.551	91.839	147.951	139.041
630	ENSECAG00000021403	20.1507	2.21219	0.425565	5.19823	2.01191e-07	3.05103e-06	29.7612	32.8413	36.1093	33.0463	3.37541	4.73397	12.1452	9.19282
633	ENSECAG00000020163	8.23107	-5.80581	1.11859	-5.19032	2.09935e-07	3.17125e-06	0	0	0.859745	0	18.5647	17.0423	12.1452	17.2365
634	ENSECAG00000035431	67.2983	1.15369	0.222429	5.1868	2.13942e-07	3.22668e-06	110.364	91.1345	79.9562	90.3915	43.8803	35.9782	44.1645	42.5168
635	ENSECAG00000010611	35.8534	1.5936	0.307457	5.18317	2.18145e-07	3.28489e-06	60.7624	50.904	52.4444	50.5415	10.9701	16.0955	20.9781	24.1312
636	ENSECAG00000000030	123.843	-1.02303	0.197512	-5.17961	2.22351e-07	3.34296e-06	95.4838	81.2821	65.3406	85.5317	139.236	190.306	161.2	172.365
638	ENSECAG00000013229	23.9899	1.85817	0.359814	5.16424	2.41418e-07	3.61824e-06	38.4415	36.9464	40.408	34.0183	8.43852	6.62756	13.2493	13.7892
639	ENSECAG00000038285	75.2997	1.39759	0.270881	5.15941	2.47723e-07	3.70693e-06	138.885	84.5663	111.767	101.083	25.3156	47.3397	47.4768	45.9641
642	ENSECAG00000010546	24.8862	-1.97676	0.384061	-5.14698	2.64711e-07	3.94263e-06	9.92039	6.56825	7.7377	16.5232	37.9733	49.2333	30.9151	40.2186
643	ENSECAG00000023220	50.8639	1.23917	0.240802	5.146	2.66093e-07	3.95705e-06	59.5223	70.6087	74.7978	80.672	30.3787	31.2442	29.811	29.8767
645	ENSECAG00000024208	68.6486	1.06553	0.207295	5.14016	2.74506e-07	4.0695e-06	102.924	88.6714	92.8524	87.4756	45.568	41.6589	46.3727	43.6659
646	ENSECAG00000010601	404.861	1.01284	0.197171	5.13686	2.79373e-07	4.13524e-06	566.702	445.82	624.175	527.77	235.435	204.508	305.839	328.643
647	ENSECAG00000007948	56.1281	-1.20817	0.235224	-5.13626	2.80253e-07	4.14186e-06	37.2015	31.1992	33.53	34.0183	70.8836	85.2115	67.3508	89.63
648	ENSECAG00000010521	16.5432	2.18301	0.425186	5.13425	2.83264e-07	4.1799e-06	28.5211	28.7361	24.0728	27.2146	5.90697	6.62756	5.52056	5.74551
649	ENSECAG00000019916	326.198	1.007	0.196229	5.13175	2.87057e-07	4.22934e-06	473.699	344.012	526.164	398.5	222.777	184.625	193.22	266.592
650	ENSECAG00000020387	93.6935	-1.06853	0.208285	-5.13012	2.89563e-07	4.25969e-06	65.7226	59.9353	55.8834	61.2329	151.05	117.402	101.578	136.743
651	ENSECAG00000035156	14.6104	2.36989	0.462326	5.12601	2.95948e-07	4.34693e-06	24.801	24.6309	23.2131	25.2707	5.06311	3.78718	5.52056	4.59641
652	ENSECAG00000014486	5.76367	5.97511	1.16612	5.12394	2.99219e-07	4.38824e-06	8.68034	16.4206	10.3169	10.6915	0	0	0	0
653	ENSECAG00000014853	111.232	-1.07754	0.210494	-5.11911	3.06984e-07	4.49522e-06	99.2039	59.9353	61.0419	68.0366	159.488	146.753	139.118	156.278
654	ENSECAG00000013889	36.0866	1.49377	0.292141	5.11318	3.16779e-07	4.63157e-06	65.7226	49.2619	49.0054	49.5695	22.784	15.1487	17.6658	19.5347
655	ENSECAG00000022320	139.528	-1.20232	0.235584	-5.10356	3.33317e-07	4.86591e-06	125.245	63.2194	80.816	70.9525	178.897	226.284	177.762	193.049
656	ENSECAG00000012328	18.0202	2.24258	0.440079	5.09585	3.47171e-07	5.03741e-06	23.5609	27.094	38.6885	29.1585	5.06311	4.73397	5.52056	10.3419
657	ENSECAG00000022120	107.228	1.16124	0.227856	5.09639	3.462e-07	5.03741e-06	168.647	131.365	122.084	171.063	54.8504	83.3179	54.1015	72.3935
658	ENSECAG00000022931	58.7846	1.38969	0.272679	5.09643	3.46126e-07	5.03741e-06	99.2039	87.0293	86.8342	68.0366	45.568	22.7231	28.7069	32.1749
661	ENSECAG00000036646	5.31345	-5.91333	1.16227	-5.08774	3.62354e-07	5.2418e-06	0	0	0	0	11.8139	10.4147	9.93701	10.3419
662	ENSECAG00000019855	56.1968	-1.68924	0.332087	-5.08674	3.64278e-07	5.26166e-06	23.5609	33.6623	25.7923	23.3268	115.608	102.254	81.7043	43.6659
663	ENSECAG00000009061	42.9858	1.49782	0.294531	5.08545	3.66764e-07	5.28959e-06	55.8022	64.0405	66.2003	67.0646	17.7209	17.0423	35.3316	20.6838
665	ENSECAG00000009721	77.486	1.25355	0.247208	5.07085	3.96053e-07	5.69482e-06	104.164	109.197	115.206	108.859	65.8205	33.1378	37.5398	45.9641
666	ENSECAG00000021009	23.3514	-2.66661	0.525993	-5.06967	3.98514e-07	5.72161e-06	1.24005	13.9575	2.57923	6.80366	39.6611	39.7653	26.4987	56.306
667	ENSECAG00000012583	35.2049	-2.07437	0.409319	-5.06784	4.02349e-07	5.76801e-06	27.2811	7.38928	12.8962	7.77561	41.3488	55.8608	75.0796	54.0078
669	ENSECAG00000013860	37.1455	-1.65031	0.325875	-5.06423	4.10054e-07	5.8609e-06	12.4005	22.1679	20.6339	15.5512	51.475	38.8186	71.7673	64.3497
670	ENSECAG00000020997	88.1554	-1.05595	0.208734	-5.05886	4.21775e-07	6.01942e-06	44.6418	54.1881	67.9198	61.2329	109.701	130.658	108.203	128.699
671	ENSECAG00000020599	63.2173	1.88079	0.372625	5.04741	4.47849e-07	6.38202e-06	159.966	104.271	90.2732	43.7378	27.8471	30.2974	29.811	19.5347
672	ENSECAG00000000074	19.5598	-2.50108	0.49651	-5.03732	4.72103e-07	6.71763e-06	3.72015	8.21032	4.29872	6.80366	14.3455	36.925	41.9563	40.2186
673	ENSECAG00000015850	80.028	-1.10525	0.21958	-5.03348	4.81644e-07	6.84321e-06	40.9216	62.3984	56.7431	41.7939	106.325	111.722	120.348	99.9719
674	ENSECAG00000020428	104.65	1.3286	0.263983	5.03292	4.83072e-07	6.85331e-06	179.807	147.786	122.943	149.681	91.136	44.4993	50.7892	50.5605
676	ENSECAG00000016499	52.4002	-1.39394	0.277053	-5.03129	4.87184e-07	6.8912e-06	38.4415	27.9151	17.1949	33.0463	65.8205	80.4775	83.9125	72.3935
677	ENSECAG00000020652	71.8454	1.1558	0.229827	5.029	4.93054e-07	6.96393e-06	97.9638	102.629	99.7304	95.2512	37.1295	34.0846	57.4138	50.5605
679	ENSECAG00000017247	43.442	1.88745	0.375754	5.02311	5.08427e-07	7.15991e-06	48.3619	103.45	49.8652	71.9244	14.3455	30.2974	14.3535	14.9383
681	ENSECAG00000018274	141.492	1.0579	0.211	5.01375	5.33794e-07	7.48408e-06	178.567	178.164	235.57	171.063	84.3852	71.0095	98.266	114.91
682	ENSECAG00000025150	736.934	1.25374	0.250044	5.01407	5.32892e-07	7.48408e-06	1652.98	888.356	888.976	724.104	446.398	382.505	457.102	455.045
685	ENSECAG00000017704	12.7156	2.77915	0.555575	5.0023	5.6649e-07	7.9077e-06	23.5609	22.9889	18.0546	24.2988	1.6877	6.62756	2.20822	2.29821
686	ENSECAG00000026945	295.448	-1.52124	0.304299	-4.99918	5.75745e-07	8.02518e-06	93.0037	195.406	164.211	156.484	336.697	297.293	702.215	418.273
689	ENSECAG00000014533	53.7148	-1.28234	0.256842	-4.99273	5.95305e-07	8.2617e-06	35.9614	29.5571	29.2313	31.1024	70.8836	97.5198	59.6221	75.8408
690	ENSECAG00000023765	33.571	-1.98065	0.397337	-4.98481	6.20216e-07	8.59493e-06	6.20024	11.4944	16.3351	19.439	34.5979	40.7121	66.2467	73.5426
691	ENSECAG00000016884	15.3493	-2.40536	0.482621	-4.98395	6.22985e-07	8.62082e-06	2.4801	7.38928	4.29872	4.85976	29.5348	22.7231	33.1234	18.3856
692	ENSECAG00000007894	104.873	1.02763	0.206256	4.98231	6.28295e-07	8.68173e-06	131.445	141.217	140.998	149.681	88.6045	53.9673	61.8303	71.2444
693	ENSECAG00000030611	10.964	-3.05617	0.613528	-4.9813	6.31577e-07	8.71449e-06	1.24005	3.28413	1.71949	2.91585	18.5647	15.1487	27.6028	17.2365
695	ENSECAG00000023874	5.37325	-5.93344	1.19183	-4.97843	6.41029e-07	8.81945e-06	0	0	0	0	10.1262	17.0423	6.62467	9.19282
698	ENSECAG00000009349	74.3105	-1.08039	0.217688	-4.96305	6.93956e-07	9.5066e-06	34.7214	51.725	52.4444	50.5415	98.7307	88.9986	109.307	108.016
699	ENSECAG00000019888	174.427	-1.00802	0.203181	-4.9612	7.00604e-07	9.58395e-06	88.0435	142.859	117.785	112.746	226.996	187.465	250.633	268.89
700	ENSECAG00000021654	7.26455	-5.62919	1.13501	-4.95958	7.06454e-07	9.65016e-06	0	0.821032	0	0	17.7209	17.0423	11.0411	11.491
701	ENSECAG00000008361	9.50147	-3.63196	0.732961	-4.95519	7.22593e-07	9.85653e-06	1.24005	0.821032	1.71949	1.9439	18.5647	23.6698	16.5617	11.491
702	ENSECAG00000010909	22.3174	2.49857	0.504983	4.94783	7.50435e-07	1.02217e-05	38.4415	14.7786	56.7431	41.7939	8.43852	4.73397	4.41645	9.19282
705	ENSECAG00000003112	17.1773	2.18581	0.442205	4.94298	7.69389e-07	1.04353e-05	28.5211	22.9889	28.3716	33.0463	5.06311	10.4147	4.41645	4.59641
706	ENSECAG00000018560	76.2527	1.60736	0.325381	4.93993	7.8151e-07	1.05697e-05	145.086	146.965	89.4134	78.7281	54.0065	36.925	20.9781	37.9204
709	ENSECAG00000007818	63.4681	1.69773	0.343848	4.93745	7.91506e-07	1.06447e-05	49.6019	153.533	82.5355	102.055	33.7541	25.5634	33.1234	27.5785
710	ENSECAG00000021517	47.5198	-1.25156	0.253481	-4.93752	7.91236e-07	1.06447e-05	33.4813	23.8099	26.6521	29.1585	57.3819	76.6903	64.0385	68.9462
713	ENSECAG00000011753	97.0623	1.1878	0.240783	4.93309	8.09374e-07	1.08545e-05	166.167	104.271	134.98	135.101	75.1028	42.6057	58.518	59.7533
714	ENSECAG00000021411	11.7334	-3.01513	0.611245	-4.93276	8.10743e-07	1.08576e-05	2.4801	3.28413	3.43898	0.971951	14.3455	32.191	18.7699	18.3856
715	ENSECAG00000017141	86.8231	-1.32147	0.26803	-4.93031	8.20992e-07	1.09795e-05	75.643	45.1567	32.6703	46.6537	126.578	98.4666	128.077	141.34
716	ENSECAG00000007123	74.402	1.15496	0.234364	4.92805	8.30548e-07	1.10918e-05	89.2835	125.618	92.8524	103.027	57.3819	36.925	44.1645	45.9641
717	ENSECAG00000013570	57.3216	-1.4072	0.285611	-4.92697	8.35127e-07	1.11374e-05	33.4813	32.0202	25.7923	34.9902	101.262	104.147	72.8714	54.0078
718	ENSECAG00000014983	28.6248	2.32274	0.47147	4.92658	8.36795e-07	1.11441e-05	26.041	80.4611	42.1275	41.7939	5.06311	12.3083	15.4576	5.74551
720	ENSECAG00000000612	23.0415	-1.86883	0.379436	-4.92528	8.42387e-07	1.11874e-05	11.1604	11.4944	12.8962	3.88781	37.1295	31.2442	39.748	36.7713
721	ENSECAG00000016998	27.7719	-1.81148	0.36797	-4.92292	8.52645e-07	1.13079e-05	6.20024	12.3155	18.0546	11.6634	35.4418	35.0314	55.2056	48.2623
722	ENSECAG00000013574	9.13223	-3.82727	0.777662	-4.92151	8.58777e-07	1.13734e-05	2.4801	0.821032	0.859745	0.971951	21.0963	15.1487	12.1452	19.5347
723	ENSECAG00000033017	75.9383	-1.2451	0.253639	-4.90896	9.15614e-07	1.21094e-05	40.9216	37.7675	54.1639	46.6537	76.7905	97.5198	119.244	134.445
724	ENSECAG00000032798	94.7885	-1.02082	0.207971	-4.90848	9.17856e-07	1.21223e-05	74.4029	55.0091	52.4444	69.9805	126.578	144.859	125.869	109.165
725	ENSECAG00000020131	5.93862	5.98447	1.22001	4.90527	9.32967e-07	1.23049e-05	23.5609	8.21032	6.01821	9.71951	0	0	0	0
726	ENSECAG00000003600	43.3413	-1.43175	0.291926	-4.90448	9.36773e-07	1.2338e-05	35.9614	16.4206	23.2131	19.439	56.5381	62.4884	71.7673	60.9024
727	ENSECAG00000010304	67.6863	1.14828	0.23418	4.90341	9.41867e-07	1.23881e-05	88.0435	96.0607	95.4316	93.3073	48.9434	29.3506	38.6439	51.7096
728	ENSECAG00000015959	31.6768	1.62541	0.331546	4.90251	9.46185e-07	1.24278e-05	42.1617	63.2194	48.1457	37.9061	17.7209	15.1487	18.7699	10.3419
729	ENSECAG00000019725	11.7948	-3.59406	0.734005	-4.89651	9.75537e-07	1.27957e-05	0	5.74722	0.859745	0	26.1594	24.6166	23.1864	13.7892
730	ENSECAG00000009877	59.1332	-1.55349	0.317608	-4.89121	1.00217e-06	1.3127e-05	13.6405	45.9778	32.6703	26.2427	80.166	82.3711	110.411	81.5863
731	ENSECAG00000006306	64.0829	1.79865	0.367799	4.89033	1.00669e-06	1.3157e-05	60.7624	147.786	81.6757	107.887	24.4717	43.5525	14.3535	32.1749
732	ENSECAG00000014429	95.4882	1.15405	0.235992	4.89023	1.0072e-06	1.3157e-05	104.164	164.206	109.188	149.681	71.7274	55.8608	58.518	50.5605
733	ENSECAG00000019161	112.958	2.4407	0.499227	4.88896	1.0137e-06	1.32237e-05	48.3619	367.822	166.79	179.811	16.877	58.7012	33.1234	32.1749
735	ENSECAG00000015011	107.614	-1.00273	0.205172	-4.88724	1.02258e-06	1.33033e-05	58.2823	68.1456	71.3588	88.4476	136.704	172.317	135.806	129.849
736	ENSECAG00000013135	27.9758	1.63618	0.335142	4.88204	1.04996e-06	1.36409e-05	37.2015	45.9778	42.1275	44.7098	18.5647	16.0955	9.93701	9.19282
737	ENSECAG00000014368	30.5721	2.23156	0.45719	4.88103	1.05534e-06	1.36922e-05	17.3607	56.6512	67.9198	59.289	9.28237	11.3615	6.62467	16.0874
738	ENSECAG00000001597	6.77647	-5.52115	1.13185	-4.87798	1.07176e-06	1.38865e-05	0	0.821032	0	0	13.5016	15.1487	13.2493	11.491
739	ENSECAG00000010848	64.4649	-1.28454	0.263488	-4.87515	1.08728e-06	1.40684e-05	44.6418	37.7675	44.7067	23.3268	86.0729	111.722	91.6413	75.8408
740	ENSECAG00000011277	26.3257	-1.65155	0.338861	-4.87384	1.09447e-06	1.41423e-05	14.8806	13.9575	8.59745	13.6073	31.2225	41.6589	44.1645	42.5168
741	ENSECAG00000000166	35.3238	2.84819	0.58523	4.8668	1.13423e-06	1.46363e-05	121.525	19.7048	72.2185	34.9902	14.3455	2.84038	6.62467	10.3419
742	ENSECAG00000023963	32.3177	1.72519	0.354566	4.86564	1.14089e-06	1.47025e-05	48.3619	42.6936	45.5665	61.2329	13.5016	6.62756	19.874	20.6838
743	ENSECAG00000039849	7.33167	-5.62182	1.15604	-4.86299	1.15625e-06	1.48803e-05	0	0	0.859745	0	6.75082	16.0955	16.5617	18.3856
745	ENSECAG00000022890	12.5644	-4.38785	0.903105	-4.85863	1.18204e-06	1.51713e-05	0	3.28413	0	0.971951	21.0963	39.7653	5.52056	29.8767
746	ENSECAG00000024341	23.2844	1.73518	0.357199	4.85776	1.18722e-06	1.52174e-05	28.5211	34.4833	36.1093	43.7378	9.28237	10.4147	9.93701	13.7892
748	ENSECAG00000007607	30.8118	1.63794	0.337602	4.85169	1.22411e-06	1.56484e-05	37.2015	36.9464	65.3406	46.6537	13.5016	14.2019	16.5617	16.0874
750	ENSECAG00000036729	9.22689	-4.21908	0.870169	-4.84858	1.24351e-06	1.58539e-05	0	0.821032	1.71949	0.971951	12.6578	15.1487	28.7069	13.7892
751	ENSECAG00000025119	53.6631	-1.29354	0.266941	-4.84581	1.26098e-06	1.60552e-05	27.2811	27.9151	28.3716	40.822	90.2922	56.8076	75.0796	82.7354
752	ENSECAG00000011236	41.9234	1.5433	0.318574	4.84442	1.26985e-06	1.61378e-05	47.1219	81.2821	61.0419	60.261	18.5647	31.2442	22.0822	13.7892
754	ENSECAG00000003869	39.1477	1.53175	0.31628	4.84301	1.27887e-06	1.62183e-05	57.0422	63.2194	62.7614	50.5415	32.0664	16.0955	17.6658	13.7892
755	ENSECAG00000022057	54.0209	-2.11659	0.437285	-4.84031	1.29636e-06	1.64183e-05	33.4813	3.28413	25.7923	19.439	81.0098	79.5307	83.9125	105.717
757	ENSECAG00000010930	14.1158	2.39351	0.495524	4.83026	1.36352e-06	1.72233e-05	29.7612	21.3468	21.4936	22.3549	2.53156	7.57435	4.41645	3.44731
759	ENSECAG00000011084	24.8635	1.61111	0.333906	4.82504	1.39972e-06	1.76107e-05	39.6816	32.8413	41.2677	35.9622	11.8139	11.3615	11.0411	14.9383
760	ENSECAG00000024578	161.881	1.50717	0.31235	4.82526	1.39822e-06	1.76107e-05	291.411	132.186	318.965	214.801	58.2258	74.7967	81.7043	122.954
761	ENSECAG00000021146	143.523	-1.09185	0.226303	-4.82474	1.40188e-06	1.76147e-05	104.164	67.3246	109.188	86.5037	191.554	161.902	251.738	175.813
762	ENSECAG00000018176	29.4728	2.78992	0.578695	4.82106	1.42799e-06	1.79192e-05	112.844	21.3468	50.7249	21.3829	10.1262	4.73397	7.72879	6.89462
764	ENSECAG00000021238	15.8764	2.1831	0.453283	4.81621	1.46312e-06	1.8312e-05	19.8408	27.9151	32.6703	23.3268	5.90697	3.78718	5.52056	8.04372
765	ENSECAG00000020292	69.7042	1.48519	0.308432	4.81528	1.46991e-06	1.83729e-05	83.0833	73.8928	130.681	122.466	32.0664	24.6166	55.2056	35.6222
766	ENSECAG00000006525	28.1139	1.54813	0.321652	4.81305	1.48645e-06	1.8507e-05	38.4415	41.8726	42.9872	43.7378	13.5016	9.46794	17.6658	17.2365
767	ENSECAG00000021560	19.4503	-2.09721	0.435732	-4.81306	1.48633e-06	1.8507e-05	4.96019	5.74722	7.7377	10.6915	22.784	23.6698	38.6439	41.3677
768	ENSECAG00000036440	10.1535	-3.04765	0.633191	-4.81316	1.48559e-06	1.8507e-05	3.72015	1.64206	0.859745	2.91585	15.1893	15.1487	18.7699	22.9821
769	ENSECAG00000011043	27.1791	1.60994	0.334635	4.81103	1.50154e-06	1.86706e-05	42.1617	38.5885	46.4262	35.9622	10.1262	10.4147	17.6658	16.0874
770	ENSECAG00000010726	21.8306	2.38032	0.494883	4.80986	1.51034e-06	1.87557e-05	65.7226	22.9889	31.8105	26.2427	5.90697	9.46794	3.31234	9.19282
773	ENSECAG00000007562	38.2701	-1.49329	0.310979	-4.8019	1.5717e-06	1.94419e-05	18.6007	20.5258	12.0364	29.1585	48.0996	61.5416	52.9974	63.2006
774	ENSECAG00000009087	42.0405	-1.487	0.30971	-4.80128	1.57657e-06	1.94769e-05	14.8806	32.8413	22.3534	17.4951	70.0397	72.9031	54.1015	51.7096
775	ENSECAG00000010628	16.8718	2.66919	0.556698	4.79468	1.62936e-06	2.01032e-05	53.3221	15.5996	21.4936	26.2427	3.37541	4.73397	3.31234	6.89462
776	ENSECAG00000032938	6.49132	-5.45193	1.13723	-4.79406	1.63441e-06	2.01395e-05	0	0	0.859745	0	11.8139	12.3083	15.4576	11.491
777	ENSECAG00000010869	5.88106	-6.07308	1.26761	-4.79095	1.65989e-06	2.04272e-05	0	0	0	0	21.9402	16.0955	4.41645	4.59641
778	ENSECAG00000016898	9.48268	-3.15933	0.660727	-4.7816	1.73904e-06	2.13737e-05	1.24005	0.821032	1.71949	3.88781	15.1893	17.0423	19.874	16.0874
782	ENSECAG00000023311	95.0253	-1.03783	0.217666	-4.76799	1.86069e-06	2.27518e-05	63.2425	63.2194	61.0419	62.2049	163.707	132.551	100.474	113.761
783	ENSECAG00000018193	75.05	1.17569	0.246737	4.76495	1.88903e-06	2.30688e-05	97.9638	84.5663	131.541	101.083	34.5979	43.5525	50.7892	56.306
784	ENSECAG00000010268	70.9243	1.20568	0.253297	4.75997	1.93626e-06	2.36155e-05	101.684	90.3135	97.1511	107.887	61.6012	36.925	41.9563	29.8767
785	ENSECAG00000008818	16.0197	-3.0439	0.639693	-4.75838	1.95155e-06	2.37112e-05	0	5.74722	0.859745	6.80366	20.2525	38.8186	15.4576	40.2186
786	ENSECAG00000014943	26.2504	1.62041	0.340537	4.7584	1.95133e-06	2.37112e-05	35.9614	45.9778	39.5482	36.9342	10.9701	17.9891	8.8329	13.7892
787	ENSECAG00000024522	34.1613	1.58661	0.333419	4.75859	1.94949e-06	2.37112e-05	33.4813	56.6512	60.1821	54.4293	14.3455	23.6698	12.1452	18.3856
788	ENSECAG00000011190	123.074	-1.31144	0.275677	-4.75717	1.96323e-06	2.38229e-05	66.9626	58.2932	93.7122	63.1768	143.455	121.19	253.946	183.856
790	ENSECAG00000036783	9.05628	-5.21219	1.09743	-4.74943	2.03989e-06	2.46905e-05	0	0	1.71949	0	20.2525	14.2019	12.1452	24.1312
791	ENSECAG00000025018	19.2603	1.86743	0.393804	4.74203	2.1159e-06	2.5578e-05	28.5211	36.1254	25.7923	30.1305	5.90697	8.52115	11.0411	8.04372
792	ENSECAG00000015807	4.42808	-5.65241	1.19219	-4.74122	2.12438e-06	2.56482e-05	0	0	0	0	9.28237	10.4147	8.8329	6.89462
793	ENSECAG00000005186	57.9859	1.59828	0.337349	4.73778	2.1607e-06	2.60537e-05	45.8818	119.05	69.6393	113.718	29.5348	28.4038	23.1864	34.4731
794	ENSECAG00000034282	28.358	3.43777	0.726388	4.73268	2.21572e-06	2.66836e-05	9.92039	14.7786	118.645	64.1488	5.06311	1.89359	5.52056	6.89462
795	ENSECAG00000004817	139.761	1.3641	0.288361	4.73055	2.23914e-06	2.69316e-05	101.684	252.878	227.832	221.605	65.8205	67.2224	97.1619	83.8845
796	ENSECAG00000009296	44.4853	2.16662	0.458328	4.72723	2.27604e-06	2.73067e-05	38.4415	36.9464	123.803	91.3634	15.1893	8.52115	22.0822	19.5347
799	ENSECAG00000010547	44.0318	-1.29074	0.273306	-4.72269	2.3275e-06	2.78543e-05	14.8806	29.5571	29.2313	27.2146	61.6012	55.8608	69.5591	64.3497
800	ENSECAG00000012983	9.90654	-3.08722	0.653932	-4.72102	2.34668e-06	2.79788e-05	0	2.46309	3.43898	1.9439	14.3455	20.8295	13.2493	22.9821
801	ENSECAG00000016469	622.054	1.25636	0.266093	4.7215	2.34114e-06	2.79788e-05	786.191	553.375	1259.53	908.775	420.238	299.187	283.757	465.387
802	ENSECAG00000021704	14.3995	2.18729	0.463285	4.72125	2.34396e-06	2.79788e-05	22.3209	25.452	20.6339	26.2427	5.06311	7.57435	3.31234	4.59641
804	ENSECAG00000002944	42.176	1.41457	0.299913	4.71661	2.39806e-06	2.85202e-05	47.1219	68.1456	69.6393	59.289	17.7209	18.9359	22.0822	34.4731
805	ENSECAG00000015395	4.5525	-5.69228	1.20731	-4.71483	2.41912e-06	2.87349e-05	0	0	0	0	7.59467	14.2019	7.72879	6.89462
807	ENSECAG00000019717	10.8877	3.75212	0.797115	4.70712	2.51236e-06	2.97685e-05	33.4813	7.38928	18.9144	21.3829	2.53156	0	1.10411	2.29821
808	ENSECAG00000003563	8.20447	-4.06584	0.864066	-4.70548	2.53272e-06	2.99726e-05	0	2.46309	0.859745	0	15.1893	18.9359	13.2493	14.9383
810	ENSECAG00000011151	241.757	1.07341	0.228196	4.70389	2.55245e-06	3.01315e-05	230.649	382.601	332.721	365.454	211.807	138.232	134.702	137.892
811	ENSECAG00000018553	77.9473	-1.09476	0.232857	-4.70142	2.58361e-06	3.04617e-05	57.0422	62.3984	45.5665	34.0183	108.013	113.615	96.0578	106.867
812	ENSECAG00000013051	65.8468	-1.22536	0.260824	-4.69803	2.62678e-06	3.09326e-05	44.6418	41.0516	45.5665	26.2427	76.7905	77.6371	113.724	101.121
813	ENSECAG00000021731	47.7885	-1.19958	0.25538	-4.69723	2.63715e-06	3.10165e-05	24.801	25.452	37.8288	27.2146	61.6012	62.4884	73.9755	68.9462
814	ENSECAG00000007779	43.5946	-1.56905	0.334167	-4.69542	2.66059e-06	3.12509e-05	22.3209	11.4944	30.0911	24.2988	61.6012	75.7435	78.392	44.815
815	ENSECAG00000012481	31.1245	-1.4537	0.309614	-4.69519	2.66361e-06	3.12509e-05	13.6405	18.0627	17.1949	17.4951	56.5381	40.7121	48.5809	36.7713
816	ENSECAG00000010050	91.4844	1.08003	0.230137	4.69298	2.69254e-06	3.15515e-05	128.965	114.944	134.12	118.578	66.6643	39.7653	52.9974	75.8408
817	ENSECAG00000000540	84.5722	1.04606	0.222919	4.69257	2.698e-06	3.15769e-05	107.884	136.291	97.1511	113.718	48.0996	55.8608	47.4768	70.0953
818	ENSECAG00000020565	36.9414	-1.37232	0.292723	-4.6881	2.7575e-06	3.22338e-05	22.3209	15.5996	24.0728	20.411	46.4119	49.2333	49.6851	67.797
820	ENSECAG00000024998	43.9725	-1.23254	0.263074	-4.68515	2.79754e-06	3.26221e-05	19.8408	27.094	29.2313	28.1866	69.1959	51.1269	67.3508	59.7533
821	ENSECAG00000015145	4643.35	3.36397	0.718156	4.68417	2.81099e-06	3.27389e-05	4438.13	11473.9	7559.73	10386.3	121.515	1663.52	660.259	843.441
822	ENSECAG00000022979	138.285	-1.07001	0.228479	-4.6832	2.82434e-06	3.28545e-05	63.2425	91.9555	121.224	78.7281	186.491	154.327	195.428	214.882
823	ENSECAG00000014412	106.767	-1.06988	0.228647	-4.67917	2.88037e-06	3.34655e-05	52.082	81.2821	68.7796	72.8964	189.023	141.072	121.452	127.55
824	ENSECAG00000000300	61.1571	-1.75337	0.374974	-4.67599	2.92543e-06	3.39258e-05	52.082	13.9575	22.3534	25.2707	79.3221	134.445	89.4331	72.3935
826	ENSECAG00000016778	8.4329	4.02373	0.860622	4.67538	2.93414e-06	3.39663e-05	12.4005	22.9889	13.7559	14.5793	1.6877	0.946794	1.10411	0
827	ENSECAG00000006474	324.423	-2.98657	0.638858	-4.67486	2.94152e-06	3.40106e-05	148.806	64.0405	36.969	41.7939	1131.61	280.251	558.681	333.24
828	ENSECAG00000006273	12.825	2.82123	0.60383	4.67222	2.97961e-06	3.44094e-05	13.6405	32.0202	25.7923	18.4671	5.06311	0.946794	5.52056	1.1491
830	ENSECAG00000019865	39.9561	-1.44969	0.310425	-4.67002	3.01178e-06	3.46971e-05	24.801	18.0627	14.6157	29.1585	70.8836	65.3288	49.6851	47.1132
831	ENSECAG00000010964	9.04214	-5.21034	1.1167	-4.66583	3.07374e-06	3.53684e-05	0	0	0.859745	0.971951	17.7209	30.2974	12.1452	10.3419
834	ENSECAG00000018572	117.295	-1.05269	0.225742	-4.66326	3.11239e-06	3.56842e-05	53.3221	90.3135	78.2368	81.6439	129.953	159.061	198.74	147.085
835	ENSECAG00000007108	11.3534	2.9971	0.642966	4.66136	3.1413e-06	3.59435e-05	33.4813	13.1365	21.4936	12.6354	2.53156	1.89359	2.20822	3.44731
836	ENSECAG00000016601	44.4813	1.22371	0.262527	4.66128	3.14252e-06	3.59435e-05	50.842	57.4722	67.0601	73.8683	29.5348	27.457	23.1864	26.4294
838	ENSECAG00000000749	76.9429	-1.06604	0.228744	-4.66041	3.15587e-06	3.601e-05	64.4825	45.9778	53.3042	35.9622	97.8869	97.5198	118.14	102.27
843	ENSECAG00000020187	68.4727	1.02298	0.219877	4.65253	3.27879e-06	3.71467e-05	81.8432	107.555	90.2732	87.4756	48.0996	50.1801	37.5398	44.815
844	ENSECAG00000021070	6.50507	-5.45253	1.17194	-4.65255	3.27856e-06	3.71467e-05	1.24005	0	0	0	13.5016	17.9891	5.52056	13.7892
846	ENSECAG00000015181	10.9092	-3.0519	0.656929	-4.64572	3.38897e-06	3.83042e-05	0	0.821032	4.29872	3.88781	13.5016	15.1487	23.1864	26.4294
847	ENSECAG00000009125	8.17364	-5.04623	1.08702	-4.64224	3.44646e-06	3.8908e-05	1.24005	0.821032	0	0	13.5016	17.0423	13.2493	19.5347
848	ENSECAG00000012818	371.545	-1.96373	0.423723	-4.63446	3.57864e-06	4.03526e-05	34.7214	168.311	202.9	199.25	400.83	438.366	882.186	645.796
849	ENSECAG00000002652	26.1173	-1.67143	0.361099	-4.62874	3.67898e-06	4.13864e-05	16.1206	7.38928	18.0546	8.74756	39.6611	38.8186	35.3316	44.815
850	ENSECAG00000011671	10.7575	-2.59293	0.560156	-4.62894	3.6754e-06	4.13864e-05	2.4801	4.92619	1.71949	2.91585	16.0332	20.8295	18.7699	18.3856
851	ENSECAG00000016629	30.4764	-1.49854	0.323834	-4.6275	3.70106e-06	4.15859e-05	16.1206	18.8837	18.9144	9.71951	54.8504	45.4461	41.9563	37.9204
852	ENSECAG00000019625	14.761	2.20158	0.475933	4.62583	3.73104e-06	4.18734e-05	23.5609	28.7361	16.3351	28.1866	3.37541	6.62756	5.52056	5.74551
853	ENSECAG00000000727	528.584	1.38838	0.300355	4.62246	3.79221e-06	4.24603e-05	487.339	977.028	904.451	690.085	160.332	424.164	272.716	312.556
854	ENSECAG00000039416	11.6398	-2.79405	0.604438	-4.62255	3.79057e-06	4.24603e-05	6.20024	3.28413	0.859745	1.9439	24.4717	12.3083	18.7699	25.2803
855	ENSECAG00000022232	9.52427	3.11938	0.675462	4.61814	3.87188e-06	4.33016e-05	11.1604	14.7786	24.9326	17.4951	2.53156	1.89359	1.10411	2.29821
856	ENSECAG00000007147	85.9047	1.32579	0.287586	4.61005	4.02564e-06	4.49439e-05	107.884	154.354	109.188	120.522	77.6344	33.1378	40.8522	43.6659
857	ENSECAG00000022705	10.5141	3.42892	0.743813	4.60993	4.02812e-06	4.49439e-05	31.0012	9.85238	22.3534	13.6073	1.6877	0	3.31234	2.29821
859	ENSECAG00000005198	32.3849	-1.44221	0.313391	-4.60196	4.18542e-06	4.65902e-05	19.8408	18.0627	12.0364	20.411	59.9135	45.4461	40.8522	42.5168
860	ENSECAG00000020277	4.29743	-5.59911	1.21691	-4.6011	4.20258e-06	4.67268e-05	0	0	0	0	6.75082	9.46794	5.52056	12.6401
861	ENSECAG00000024945	63.5804	1.18746	0.25815	4.5999	4.22688e-06	4.69424e-05	80.6032	70.6087	104.029	97.1951	27.8471	35.9782	45.2686	47.1132
862	ENSECAG00000017487	210.077	1.81474	0.394692	4.59785	4.26876e-06	4.73525e-05	416.656	448.283	209.778	235.212	151.05	124.03	50.7892	44.815
863	ENSECAG00000030791	14.5361	2.4576	0.534858	4.59486	4.33049e-06	4.79816e-05	12.4005	19.7048	37.8288	28.1866	4.21926	3.78718	4.41645	5.74551
864	ENSECAG00000016180	210.534	1.20974	0.263375	4.59321	4.3649e-06	4.83069e-05	275.291	383.422	221.814	296.445	181.428	131.604	82.8084	111.463
865	ENSECAG00000017930	24.691	1.82748	0.398115	4.59033	4.42553e-06	4.89213e-05	45.8818	22.9889	48.1457	36.9342	10.9701	6.62756	11.0411	14.9383
866	ENSECAG00000019219	18.1528	1.90745	0.41573	4.5882	4.47078e-06	4.93254e-05	35.9614	26.273	25.7923	27.2146	10.1262	7.57435	8.8329	3.44731
868	ENSECAG00000008971	186.651	-1.19527	0.261157	-4.57682	4.72092e-06	5.20063e-05	74.4029	154.354	98.0109	125.382	222.777	208.295	258.362	351.625
869	ENSECAG00000014766	8.10716	-3.67405	0.803637	-4.57178	4.83597e-06	5.32124e-05	0	1.64206	0.859745	1.9439	10.9701	13.2551	14.3535	21.8329
870	ENSECAG00000014287	8.5674	4.44842	0.973195	4.57094	4.8554e-06	5.33648e-05	24.801	13.1365	18.9144	8.74756	0.843852	0.946794	0	1.1491
871	ENSECAG00000008285	73.3326	-1.18658	0.25967	-4.56957	4.88725e-06	5.36531e-05	42.1617	31.1992	45.5665	60.261	81.8537	108.881	123.661	93.0773
872	ENSECAG00000024860	13.3928	2.52983	0.55378	4.56829	4.91716e-06	5.39196e-05	18.6007	12.3155	27.5118	33.0463	4.21926	4.73397	4.41645	2.29821
873	ENSECAG00000019173	34.8848	1.51021	0.330622	4.56777	4.92934e-06	5.39913e-05	47.1219	53.3671	51.5847	55.4012	27.0033	20.8295	8.8329	14.9383
875	ENSECAG00000016503	8.29642	-4.49054	0.984115	-4.56302	5.04229e-06	5.51022e-05	0	0	0.859745	1.9439	26.1594	10.4147	14.3535	12.6401
877	ENSECAG00000011882	28.7761	-1.48848	0.32643	-4.55989	5.11814e-06	5.57399e-05	13.6405	15.5996	13.7559	17.4951	51.475	34.0846	49.6851	34.4731
879	ENSECAG00000018735	36.9815	-1.48036	0.32478	-4.55805	5.16307e-06	5.61015e-05	14.8806	19.7048	19.7741	23.3268	44.7242	73.8499	37.5398	62.0515
880	ENSECAG00000019018	49.5477	1.46248	0.320853	4.5581	5.16183e-06	5.61015e-05	54.5621	96.0607	70.4991	69.9805	25.3156	41.6589	18.7699	19.5347
882	ENSECAG00000015601	9.5788	-2.97217	0.6528	-4.55295	5.28983e-06	5.73485e-05	2.4801	0.821032	2.57923	2.91585	13.5016	15.1487	25.3946	13.7892
883	ENSECAG00000015029	21.6204	3.01106	0.661675	4.55066	5.34786e-06	5.79019e-05	33.4813	84.5663	17.1949	18.4671	2.53156	7.57435	1.10411	8.04372
884	ENSECAG00000015149	101.836	1.69828	0.373211	4.55046	5.35299e-06	5.79019e-05	84.3233	235.636	155.614	146.765	26.1594	80.4775	39.748	45.9641
886	ENSECAG00000008506	50.9919	2.7905	0.613616	4.54764	5.42515e-06	5.855e-05	23.5609	159.28	68.7796	104.971	7.59467	31.2442	3.31234	9.19282
887	ENSECAG00000007047	18.7393	3.74323	0.823971	4.54292	5.5481e-06	5.98094e-05	85.5634	11.4944	28.3716	14.5793	6.75082	0.946794	2.20822	0
890	ENSECAG00000018525	7.49241	-3.9223	0.86487	-4.53513	5.75669e-06	6.18489e-05	0	1.64206	1.71949	0	14.3455	15.1487	12.1452	14.9383
891	ENSECAG00000004031	5.44558	5.8969	1.30047	4.53442	5.77617e-06	6.19884e-05	2.4801	21.3468	5.15847	14.5793	0	0	0	0
893	ENSECAG00000025008	116.335	-1.05277	0.232265	-4.53261	5.82607e-06	6.23839e-05	89.2835	70.6087	73.0783	69.9805	103.794	174.21	187.699	162.023
894	ENSECAG00000014110	20.4307	1.6427	0.362865	4.52703	5.98172e-06	6.3979e-05	32.2413	27.094	32.6703	32.0744	10.9701	10.4147	9.93701	8.04372
895	ENSECAG00000021651	11.1122	-2.89651	0.640073	-4.52529	6.03141e-06	6.44383e-05	2.4801	2.46309	1.71949	3.88781	8.43852	29.3506	19.874	20.6838
896	ENSECAG00000030463	17.2222	-1.96211	0.433727	-4.52383	6.07298e-06	6.48101e-05	6.20024	9.03135	7.7377	4.85976	20.2525	37.8718	25.3946	26.4294
898	ENSECAG00000018853	379.478	3.23992	0.716668	4.52081	6.16036e-06	6.55962e-05	208.328	531.207	772.051	1233.41	15.1893	114.562	79.4961	81.5863
899	ENSECAG00000009638	36.2167	1.40072	0.30991	4.51978	6.19053e-06	6.58199e-05	53.3221	68.9667	46.4262	41.7939	23.6279	20.8295	20.9781	13.7892
902	ENSECAG00000029185	83.0143	1.36904	0.303549	4.51012	6.47915e-06	6.86847e-05	117.805	86.2083	162.492	111.774	50.6311	24.6166	49.6851	60.9024
903	ENSECAG00000011459	24.5541	1.71469	0.380234	4.50955	6.49639e-06	6.87912e-05	24.801	45.9778	42.9872	36.9342	11.8139	17.0423	8.8329	8.04372
905	ENSECAG00000017053	19.7674	1.95113	0.433311	4.50283	6.7053e-06	7.08465e-05	33.4813	18.0627	37.8288	35.9622	5.06311	8.52115	7.72879	11.491
907	ENSECAG00000016819	25.753	1.54391	0.343236	4.4981	6.85622e-06	7.22814e-05	39.6816	42.6936	36.1093	34.9902	16.877	7.57435	15.4576	12.6401
908	ENSECAG00000009739	7.98565	-4.01186	0.894105	-4.48702	7.22272e-06	7.60613e-05	0	0	3.43898	0	11.8139	17.0423	14.3535	17.2365
909	ENSECAG00000014941	22.951	-1.73195	0.386234	-4.48421	7.31847e-06	7.69848e-05	13.6405	9.85238	6.01821	13.6073	32.0664	44.4993	38.6439	25.2803
911	ENSECAG00000009088	4.34946	5.55433	1.23974	4.48023	7.45642e-06	7.82638e-05	7.44029	4.92619	6.87796	15.5512	0	0	0	0
912	ENSECAG00000006357	32.5993	-1.83355	0.409602	-4.47641	7.59071e-06	7.9586e-05	27.2811	12.3155	13.7559	4.85976	43.8803	64.382	54.1015	40.2186
913	ENSECAG00000010524	52.9594	1.13619	0.253833	4.47614	7.60053e-06	7.96016e-05	89.2835	67.3246	61.0419	73.8683	27.0033	39.7653	30.9151	34.4731
916	ENSECAG00000038552	11.9246	2.41677	0.5405	4.47135	7.77272e-06	8.11384e-05	12.4005	24.6309	21.4936	21.3829	2.53156	2.84038	5.52056	4.59641
918	ENSECAG00000024965	18.0866	1.89262	0.423456	4.46946	7.84161e-06	8.16792e-05	32.2413	33.6623	24.9326	23.3268	10.9701	3.78718	7.72879	8.04372
919	ENSECAG00000000697	63.7089	-1.10381	0.247155	-4.46604	7.96798e-06	8.29051e-05	28.5211	36.1254	53.3042	42.7659	76.7905	92.7858	81.7043	97.6737
920	ENSECAG00000021525	445.671	1.31076	0.293679	4.46324	8.07306e-06	8.39071e-05	435.257	463.062	918.207	723.132	189.023	186.518	315.776	334.389
921	ENSECAG00000021799	9.57076	-4.70073	1.05411	-4.45944	8.21753e-06	8.53e-05	0	0	1.71949	0.971951	4.21926	17.0423	34.2275	18.3856
922	ENSECAG00000022568	27.2457	1.55431	0.34856	4.45924	8.22491e-06	8.53e-05	38.4415	41.8726	43.847	37.9061	14.3455	7.57435	12.1452	21.8329
924	ENSECAG00000016624	17.7276	-1.80087	0.40406	-4.45695	8.31354e-06	8.60325e-05	11.1604	8.21032	6.87796	5.83171	29.5348	29.3506	20.9781	29.8767
925	ENSECAG00000003473	104.304	1.20848	0.271179	4.45642	8.33408e-06	8.61519e-05	177.327	133.007	153.035	118.578	35.4418	80.4775	60.7262	75.8408
926	ENSECAG00000011178	9.55627	2.92478	0.656366	4.45601	8.34975e-06	8.62207e-05	18.6007	22.1679	9.45719	17.4951	2.53156	2.84038	2.20822	1.1491
929	ENSECAG00000008681	4.09642	-5.53674	1.24425	-4.44987	8.59229e-06	8.84386e-05	0	0	0	0	5.90697	13.2551	4.41645	9.19282
930	ENSECAG00000014680	81.2365	-1.17467	0.264013	-4.44928	8.61572e-06	8.85844e-05	68.2027	37.7675	55.0237	39.85	140.923	88.9986	121.452	97.6737
933	ENSECAG00000011250	17.8134	-1.81034	0.407388	-4.44376	8.83985e-06	9.05966e-05	3.72015	8.21032	10.3169	8.74756	27.0033	28.4038	33.1234	22.9821
934	ENSECAG00000013822	7.27463	-4.89324	1.10153	-4.44221	8.90379e-06	9.11542e-05	0	0.821032	0.859745	0	16.877	11.3615	11.0411	17.2365
935	ENSECAG00000031458	3.78458	-5.42863	1.22221	-4.44163	8.92782e-06	9.13025e-05	0	0	0	0	8.43852	9.46794	6.62467	5.74551
937	ENSECAG00000013484	10.6994	2.60796	0.587329	4.44037	8.98031e-06	9.16433e-05	17.3607	13.1365	21.4936	21.3829	2.53156	2.84038	1.10411	5.74551
938	ENSECAG00000029043	54.0488	1.23156	0.277373	4.44009	8.99201e-06	9.16648e-05	91.7636	80.4611	65.3406	65.1207	21.9402	33.1378	29.811	44.815
939	ENSECAG00000000225	15.7274	-2.04542	0.460855	-4.43832	9.06627e-06	9.23234e-05	3.72015	3.28413	8.59745	8.74756	27.8471	22.7231	19.874	31.0258
940	ENSECAG00000017758	21.6552	-1.7582	0.396317	-4.43635	9.14968e-06	9.30484e-05	8.68034	13.9575	6.87796	9.71951	37.1295	25.5634	26.4987	44.815
941	ENSECAG00000024121	71.9655	1.24059	0.279654	4.43618	9.15693e-06	9.30484e-05	110.364	76.3559	130.681	87.4756	55.6942	29.3506	37.5398	48.2623
942	ENSECAG00000020392	30.35	1.42246	0.320762	4.43465	9.22236e-06	9.36138e-05	50.842	47.6198	34.3898	44.7098	18.5647	20.8295	14.3535	11.491
944	ENSECAG00000011844	31.0505	1.56633	0.353858	4.42644	9.58031e-06	9.70413e-05	59.5223	51.725	42.1275	33.0463	23.6279	11.3615	14.3535	12.6401
945	ENSECAG00000006470	11.9072	2.34566	0.530009	4.4257	9.61304e-06	9.71669e-05	22.3209	18.0627	24.0728	15.5512	5.06311	5.68076	2.20822	2.29821
946	ENSECAG00000007880	7.42253	-4.92451	1.11269	-4.42576	9.61049e-06	9.71669e-05	0	0	1.71949	0	20.2525	10.4147	14.3535	12.6401
948	ENSECAG00000027749	16.0034	2.20791	0.499081	4.42396	9.6908e-06	9.77462e-05	19.8408	45.1567	20.6339	19.439	5.06311	6.62756	5.52056	5.74551
949	ENSECAG00000002186	13.7849	-2.25444	0.509856	-4.42171	9.79211e-06	9.8664e-05	3.72015	3.28413	5.15847	6.80366	15.1893	21.7763	19.874	34.4731
955	ENSECAG00000024530	19.9669	2.07474	0.470706	4.40772	1.04463e-05	0.000104595	24.801	41.8726	23.2131	39.85	13.5016	7.57435	6.62467	2.29821
956	ENSECAG00000000327	64.5768	1.11944	0.25399	4.40741	1.04614e-05	0.000104636	85.5634	94.4186	90.2732	82.6159	24.4717	49.2333	46.3727	43.6659
957	ENSECAG00000013054	45.1706	-1.19936	0.272184	-4.40644	1.05084e-05	0.000104996	34.7214	23.8099	29.2313	22.3549	54.8504	60.5948	79.4961	56.306
958	ENSECAG00000007800	46.2557	1.18856	0.269973	4.40254	1.06992e-05	0.00010679	62.0024	67.3246	61.0419	67.0646	30.3787	27.457	37.5398	17.2365
959	ENSECAG00000024663	95.7504	1.36778	0.310713	4.40207	1.07225e-05	0.000106912	115.325	169.133	145.297	123.438	79.3221	67.2224	37.5398	28.7276
962	ENSECAG00000013088	5.2196	-5.13434	1.16728	-4.39856	1.0897e-05	0.000108298	0	0.821032	0	0	8.43852	12.3083	12.1452	8.04372
965	ENSECAG00000024043	118.755	-4.00181	0.910114	-4.39704	1.09737e-05	0.000108736	40.9216	3.28413	9.45719	2.91585	403.361	98.4666	230.759	160.874
966	ENSECAG00000035439	34.0625	-1.9409	0.441578	-4.39536	1.10587e-05	0.000109465	3.72015	7.38928	23.2131	21.3829	68.352	50.1801	41.9563	56.306
967	ENSECAG00000015376	72.7593	-1.07713	0.245084	-4.39493	1.10807e-05	0.00010957	39.6816	59.9353	35.2495	51.5134	94.5114	89.9454	89.4331	121.805
968	ENSECAG00000005829	21.0058	1.6617	0.378132	4.3945	1.11027e-05	0.000109674	34.7214	26.273	36.1093	31.1024	10.9701	14.2019	6.62467	8.04372
969	ENSECAG00000015083	107.124	-1.01067	0.230016	-4.39392	1.11326e-05	0.000109845	52.082	91.9555	73.0783	66.0927	154.425	171.37	118.14	129.849
971	ENSECAG00000034818	19.3363	-1.93978	0.441696	-4.39167	1.12481e-05	0.000110767	13.6405	9.85238	3.43898	5.83171	40.5049	28.4038	24.2905	28.7276
972	ENSECAG00000016219	27.0842	1.56039	0.355505	4.38923	1.13753e-05	0.000111904	24.801	51.725	39.5482	45.6817	16.877	13.2551	12.1452	12.6401
973	ENSECAG00000025065	603.845	1.05098	0.239477	4.38865	1.14059e-05	0.000112089	714.268	1022.18	756.575	765.898	423.614	551.981	257.258	338.985
974	ENSECAG00000022611	33.5758	1.37509	0.313516	4.38602	1.15444e-05	0.000113334	43.4017	48.4409	62.7614	38.8781	20.2525	13.2551	22.0822	19.5347
975	ENSECAG00000018731	67.6244	1.12232	0.25602	4.38371	1.16675e-05	0.000114426	65.7226	96.0607	91.1329	116.634	33.7541	40.7121	45.2686	51.7096
976	ENSECAG00000018333	125.645	-1.56393	0.357183	-4.3785	1.195e-05	0.000117076	62.0024	105.913	32.6703	53.4573	267.501	206.401	162.305	114.91
977	ENSECAG00000010723	31.7573	1.38018	0.31526	4.3779	1.19827e-05	0.000117156	49.6019	45.9778	42.9872	44.7098	10.9701	23.6698	15.4576	20.6838
978	ENSECAG00000020261	30.8441	1.43021	0.326682	4.37798	1.19786e-05	0.000117156	39.6816	41.0516	40.408	59.289	22.784	14.2019	13.2493	16.0874
979	ENSECAG00000017701	18.6075	-2.75918	0.630287	-4.37765	1.19965e-05	0.000117171	0	3.28413	10.3169	4.85976	18.5647	16.0955	47.4768	48.2623
980	ENSECAG00000017527	135.943	-1.59128	0.363597	-4.37649	1.20606e-05	0.000117677	50.842	131.365	41.2677	46.6537	178.897	286.879	168.929	182.707
981	ENSECAG00000014015	22.1105	1.56244	0.357084	4.37555	1.21127e-05	0.000118065	35.9614	32.8413	35.2495	28.1866	13.5016	8.52115	8.8329	13.7892
982	ENSECAG00000019283	34.468	2.18569	0.500007	4.37132	1.23495e-05	0.000120251	32.2413	33.6623	81.6757	77.7561	7.59467	4.73397	24.2905	13.7892
983	ENSECAG00000026902	15.9535	1.91235	0.43786	4.36749	1.25681e-05	0.000122255	34.7214	23.8099	22.3534	20.411	8.43852	6.62756	5.52056	5.74551
984	ENSECAG00000023301	57.0977	1.15689	0.264909	4.36712	1.25893e-05	0.000122337	105.404	78.819	56.7431	74.8403	35.4418	32.191	33.1234	40.2186
986	ENSECAG00000013048	33.5513	1.5712	0.360395	4.35966	1.30264e-05	0.000126327	31.0012	54.1881	55.0237	60.261	14.3455	21.7763	8.8329	22.9821
987	ENSECAG00000004152	27.9659	2.00036	0.458928	4.35877	1.30793e-05	0.000126652	17.3607	77.177	41.2677	42.7659	10.9701	10.4147	8.8329	14.9383
989	ENSECAG00000014145	5.31227	-5.14896	1.18253	-4.3542	1.33553e-05	0.000129124	0	0	0	0.971951	10.9701	5.68076	9.93701	14.9383
990	ENSECAG00000002320	64.9856	-1.11458	0.256077	-4.3525	1.34591e-05	0.000129996	52.082	29.5571	36.969	46.6537	75.9467	95.6262	76.1837	106.867
991	ENSECAG00000000346	11.6646	-2.41913	0.556024	-4.35077	1.35659e-05	0.000130857	7.44029	2.46309	1.71949	3.88781	23.6279	22.7231	17.6658	13.7892
993	ENSECAG00000013745	22.2981	-1.6966	0.390185	-4.3482	1.3726e-05	0.000132173	4.96019	9.03135	11.1767	16.5232	43.0365	28.4038	34.2275	31.0258
994	ENSECAG00000016127	39.76	1.15401	0.265687	4.3435	1.40231e-05	0.000134898	50.842	59.1143	61.0419	48.5976	28.691	23.6698	24.2905	21.8329
996	ENSECAG00000020196	12.7892	2.29799	0.529329	4.34133	1.41622e-05	0.000135963	18.6007	26.273	16.3351	23.3268	1.6877	4.73397	3.31234	8.04372
997	ENSECAG00000011462	60.5682	1.55983	0.359479	4.33915	1.43035e-05	0.000137182	59.5223	75.5349	126.382	99.139	19.4086	20.8295	32.0193	51.7096
998	ENSECAG00000037793	174.734	1.12351	0.259102	4.33616	1.44993e-05	0.00013892	235.609	307.066	206.339	209.941	114.764	159.061	93.8495	71.2444
999	ENSECAG00000018794	15.9153	2.193	0.505933	4.33456	1.46049e-05	0.000139792	28.5211	24.6309	22.3534	29.1585	2.53156	12.3083	5.52056	2.29821
1000	ENSECAG00000027094	9.5501	-3.58414	0.827163	-4.33305	1.47054e-05	0.000140613	3.72015	0.821032	0.859745	0.971951	27.0033	23.6698	4.41645	14.9383
1003	ENSECAG00000007414	20.4687	-1.94658	0.449837	-4.32731	1.50943e-05	0.000143757	1.24005	9.85238	12.8962	8.74756	29.5348	36.925	23.1864	41.3677
1004	ENSECAG00000022603	26.8366	1.39352	0.322025	4.32738	1.50894e-05	0.000143757	45.8818	35.3044	32.6703	41.7939	15.1893	12.3083	15.4576	16.0874
1005	ENSECAG00000011290	13.2131	-2.36448	0.546854	-4.32379	1.53373e-05	0.000145926	2.4801	2.46309	4.29872	7.77561	14.3455	17.0423	32.0193	25.2803
1006	ENSECAG00000018314	34.2411	-1.50292	0.34769	-4.32259	1.54209e-05	0.000146521	17.3607	21.3468	15.4754	17.4951	64.9766	64.382	44.1645	28.7276
1007	ENSECAG00000024769	3160.23	1.73387	0.401132	4.32245	1.54305e-05	0.000146521	9792.66	2340.76	4397.59	2908.08	2321.44	1150.35	1148.28	1222.65
1009	ENSECAG00000000759	31.1068	-1.71281	0.396503	-4.31979	1.56178e-05	0.000148005	14.8806	22.1679	12.0364	8.74756	50.6311	35.9782	32.0193	72.3935
1011	ENSECAG00000026826	17.668	1.93013	0.447032	4.31766	1.57692e-05	0.000149144	27.2811	18.8837	26.6521	38.8781	5.06311	7.57435	5.52056	11.491
1013	ENSECAG00000018527	106.6	1.00643	0.233475	4.31064	1.6278e-05	0.000153653	152.526	108.376	177.107	131.213	73.4151	58.7012	61.8303	89.63
1014	ENSECAG00000008013	4.02961	-5.52569	1.28278	-4.30758	1.65053e-05	0.000155644	0	0	0	0	10.1262	14.2019	3.31234	4.59641
1016	ENSECAG00000013019	270.029	-1.00154	0.232778	-4.30254	1.68848e-05	0.00015891	130.205	235.636	165.071	187.587	359.481	465.823	269.403	347.029
1018	ENSECAG00000032956	5.26881	-5.14847	1.19686	-4.30164	1.69537e-05	0.000159244	1.24005	0	0	0	17.7209	8.52115	6.62467	8.04372
1020	ENSECAG00000012659	16.6092	-2.05475	0.478004	-4.29861	1.71871e-05	0.000161121	1.24005	8.21032	6.87796	8.74756	19.4086	38.8186	24.2905	25.2803
1021	ENSECAG00000034514	32.4331	1.39261	0.324396	4.29293	1.7633e-05	0.000165139	40.9216	40.2305	61.9016	44.7098	14.3455	24.6166	14.3535	18.3856
1023	ENSECAG00000018687	19.1795	2.08233	0.485618	4.28801	1.80284e-05	0.000168512	53.3221	21.3468	21.4936	28.1866	5.06311	10.4147	4.41645	9.19282
1024	ENSECAG00000017741	57.2048	1.39454	0.325288	4.2871	1.81019e-05	0.000169034	85.5634	128.902	49.0054	68.0366	32.0664	33.1378	27.6028	33.324
1025	ENSECAG00000000678	18.186	1.66342	0.388087	4.2862	1.81759e-05	0.000169559	26.041	24.6309	33.53	26.2427	7.59467	9.46794	9.93701	8.04372
1026	ENSECAG00000023244	39.4269	-1.2547	0.292759	-4.28578	1.821e-05	0.00016959	19.8408	20.5258	26.6521	26.2427	67.5082	64.382	40.8522	49.4114
1027	ENSECAG00000023878	57.586	-1.00637	0.234818	-4.28572	1.82147e-05	0.00016959	27.2811	36.9464	40.408	47.6256	74.259	77.6371	78.392	78.139
1028	ENSECAG00000008435	80.4611	1.10296	0.257442	4.28431	1.83306e-05	0.000170504	101.684	110.018	128.102	98.1671	29.5348	56.8076	59.6221	59.7533
1030	ENSECAG00000031387	18.4102	-1.97917	0.462541	-4.27892	1.87803e-05	0.000174346	14.8806	3.28413	7.7377	4.85976	29.5348	23.6698	25.3946	37.9204
1031	ENSECAG00000022257	4.90193	-5.03606	1.17773	-4.27607	1.90223e-05	0.000176422	0	0	0.859745	0	7.59467	9.46794	13.2493	8.04372
1033	ENSECAG00000022581	33.7701	-1.229	0.287776	-4.27069	1.94872e-05	0.000180384	17.3607	22.9889	22.3534	17.4951	46.4119	46.3929	40.8522	56.306
1040	ENSECAG00000007228	10.7077	2.48416	0.583045	4.26065	2.03829e-05	0.000187225	22.3209	20.5258	17.1949	12.6354	4.21926	0.946794	5.52056	2.29821
1041	ENSECAG00000023776	12.8513	3.09131	0.725527	4.26077	2.0372e-05	0.000187225	3.72015	41.0516	18.0546	29.1585	2.53156	3.78718	2.20822	2.29821
1042	ENSECAG00000024997	9.36473	2.53701	0.595676	4.25904	2.05307e-05	0.000188402	17.3607	16.4206	15.4754	14.5793	3.37541	0.946794	3.31234	3.44731
1043	ENSECAG00000017114	16.9412	1.96339	0.461226	4.25691	2.07273e-05	0.000190024	37.2015	27.9151	26.6521	16.5232	6.75082	10.4147	6.62467	3.44731
1044	ENSECAG00000000511	296.627	1.20005	0.282013	4.25531	2.08758e-05	0.000191201	220.729	504.934	360.233	566.648	157.8	178.944	227.447	156.278
1045	ENSECAG00000009675	7.76549	3.24498	0.763426	4.25054	2.13251e-05	0.000194944	17.3607	9.03135	15.4754	14.5793	1.6877	2.84038	0	1.1491
1050	ENSECAG00000016210	24.0519	1.82803	0.430768	4.24364	2.19921e-05	0.000200275	39.6816	16.4206	47.286	46.6537	10.1262	8.52115	9.93701	13.7892
1051	ENSECAG00000010054	13.6579	2.25118	0.531298	4.23714	2.26389e-05	0.000205969	38.4415	14.7786	18.0546	19.439	5.90697	4.73397	3.31234	4.59641
1053	ENSECAG00000021655	45.2445	1.61209	0.380705	4.23449	2.29075e-05	0.000208017	37.2015	64.8615	89.4134	80.672	25.3156	12.3083	16.5617	35.6222
1054	ENSECAG00000023319	7.77997	3.842	0.907451	4.23384	2.29732e-05	0.000208217	11.1604	8.21032	17.1949	21.3829	0.843852	0	0	3.44731
1055	ENSECAG00000039454	68.1585	-1.10173	0.260217	-4.23388	2.29695e-05	0.000208217	37.2015	36.9464	47.286	51.5134	84.3852	85.2115	129.181	73.5426
1057	ENSECAG00000010545	12.0385	-2.2643	0.535461	-4.2287	2.35048e-05	0.000212633	0	4.92619	5.15847	5.83171	17.7209	18.9359	26.4987	17.2365
1058	ENSECAG00000016911	23.8862	-2.06624	0.489294	-4.2229	2.41182e-05	0.000217976	16.1206	4.10516	8.59745	8.74756	19.4086	43.5525	61.8303	28.7276
1060	ENSECAG00000016278	32.1951	1.78355	0.422491	4.22152	2.42665e-05	0.000218796	32.2413	41.8726	59.3224	65.1207	8.43852	7.57435	16.5617	26.4294
1061	ENSECAG00000021987	14.7423	2.08065	0.492879	4.22141	2.42776e-05	0.000218796	31.0012	22.9889	20.6339	20.411	2.53156	4.73397	11.0411	4.59641
1062	ENSECAG00000018104	31.1685	2.23538	0.530047	4.21733	2.47216e-05	0.000222587	26.041	100.166	37.8288	41.7939	9.28237	21.7763	4.41645	8.04372
1066	ENSECAG00000023732	857.374	1.30072	0.308718	4.21329	2.51677e-05	0.000225873	535.701	1854.71	1113.37	1374.34	464.963	603.108	469.248	443.554
1067	ENSECAG00000012279	53.9169	-1.22625	0.291127	-4.21209	2.5302e-05	0.000226746	39.6816	27.094	40.408	22.3549	87.7606	55.8608	66.2467	91.9282
1069	ENSECAG00000018788	39.3177	1.2703	0.301698	4.2105	2.54811e-05	0.000227923	66.9626	44.3357	64.4808	46.6537	25.3156	17.0423	19.874	29.8767
1070	ENSECAG00000014289	45.3621	-1.02307	0.242996	-4.21023	2.55116e-05	0.000227983	29.7612	30.3782	29.2313	30.1305	59.9135	54.9141	59.6221	68.9462
1071	ENSECAG00000019399	137.579	-1.05145	0.249782	-4.20946	2.55984e-05	0.000228545	119.045	67.3246	86.8342	86.5037	237.966	127.817	184.387	190.751
1073	ENSECAG00000009502	53.4235	-1.10279	0.26204	-4.2085	2.57075e-05	0.000228878	45.8818	24.6309	35.2495	31.1024	77.6344	60.5948	69.5591	82.7354
1074	ENSECAG00000016154	5.24955	-5.12638	1.21808	-4.20858	2.56977e-05	0.000228878	0	0.821032	0	0	4.21926	7.57435	12.1452	17.2365
1075	ENSECAG00000022273	5.14923	5.05106	1.20061	4.20708	2.58697e-05	0.000230108	9.92039	16.4206	5.15847	8.74756	0	0.946794	0	0
1076	ENSECAG00000023281	14.7646	-2.01382	0.47926	-4.20193	2.64649e-05	0.000235183	4.96019	9.03135	3.43898	5.83171	28.691	20.8295	15.4576	29.8767
1077	ENSECAG00000014536	17.5842	3.20614	0.764003	4.19651	2.71062e-05	0.000240435	1.24005	55.8301	30.9508	38.8781	4.21926	2.84038	4.41645	2.29821
1079	ENSECAG00000001418	3.43398	-5.28595	1.25972	-4.19614	2.71502e-05	0.000240603	0	0	0	0	7.59467	8.52115	3.31234	8.04372
1081	ENSECAG00000032767	51.5399	1.05616	0.252064	4.19005	2.78895e-05	0.000246697	79.3631	61.5774	64.4808	72.8964	32.9102	26.5102	30.9151	43.6659
1082	ENSECAG00000019351	40.5514	1.89409	0.45215	4.18908	2.80092e-05	0.000247527	26.041	91.9555	62.7614	74.8403	11.8139	31.2442	16.5617	9.19282
1084	ENSECAG00000000577	85.8761	-1.2201	0.291417	-4.18677	2.82946e-05	0.000249588	71.9228	32.0202	58.4626	44.7098	81.8537	115.509	144.639	137.892
1085	ENSECAG00000036105	122.016	3.26928	0.781127	4.18534	2.8474e-05	0.000250939	34.7214	345.654	240.728	263.399	13.5016	51.1269	14.3535	12.6401
1086	ENSECAG00000000224	22.4896	-1.60397	0.383355	-4.18403	2.86384e-05	0.000252155	13.6405	12.3155	13.7559	4.85976	33.7541	35.9782	25.3946	40.2186
1087	ENSECAG00000016106	49.3477	-1.13771	0.271974	-4.18314	2.87509e-05	0.00025268	19.8408	29.5571	34.3898	38.8781	77.6344	63.4352	55.2056	75.8408
1088	ENSECAG00000023292	48.0575	-1.05697	0.252673	-4.18315	2.87502e-05	0.00025268	37.2015	31.1992	31.8105	25.2707	77.6344	58.7012	64.0385	58.6042
1089	ENSECAG00000005306	24.202	1.57283	0.376075	4.18221	2.88687e-05	0.000253483	34.7214	37.7675	36.969	35.9622	20.2525	7.57435	7.72879	12.6401
1092	ENSECAG00000009173	5.46985	5.14273	1.23023	4.1803	2.91119e-05	0.000254916	4.96019	18.8837	5.15847	13.6073	0	0	0	1.1491
1093	ENSECAG00000000666	10.7321	-2.43362	0.58229	-4.17939	2.92288e-05	0.000255706	4.96019	1.64206	4.29872	2.91585	27.8471	16.0955	15.4576	12.6401
1094	ENSECAG00000020411	21.2348	3.26502	0.781561	4.17757	2.94643e-05	0.00025753	86.8034	9.03135	35.2495	23.3268	10.1262	1.89359	0	3.44731
1095	ENSECAG00000010437	23.2896	1.62938	0.390062	4.17724	2.95064e-05	0.000257662	21.0808	32.8413	51.5847	34.9902	11.8139	10.4147	13.2493	10.3419
1096	ENSECAG00000023050	3.30168	-5.2164	1.24896	-4.17661	2.95889e-05	0.000258147	0	0	0	0	5.90697	4.73397	7.72879	8.04372
1097	ENSECAG00000024510	26.0305	-1.39234	0.333406	-4.1761	2.9655e-05	0.000258488	18.6007	13.1365	13.7559	12.6354	43.8803	40.7121	27.6028	37.9204
1102	ENSECAG00000011828	44.1354	1.08842	0.261043	4.16953	3.05232e-05	0.000264968	49.6019	59.1143	67.0601	64.1488	32.9102	22.7231	26.4987	31.0258
1103	ENSECAG00000034144	17.8628	-1.81835	0.436126	-4.16933	3.05496e-05	0.000264968	7.44029	4.92619	7.7377	11.6634	25.3156	35.9782	17.6658	32.1749
1105	ENSECAG00000019071	29.3986	-1.43096	0.343331	-4.16787	3.07464e-05	0.000265914	22.3209	9.03135	14.6157	18.4671	36.2856	40.7121	39.748	54.0078
1107	ENSECAG00000008465	44.1948	-1.19789	0.287711	-4.16352	3.13379e-05	0.000270445	18.6007	34.4833	29.2313	24.2988	67.5082	73.8499	59.6221	45.9641
1108	ENSECAG00000009039	70.2375	-1.04933	0.252021	-4.16367	3.13171e-05	0.000270445	37.2015	64.0405	41.2677	39.85	107.169	99.4134	98.266	74.6917
1109	ENSECAG00000015606	37.1622	-2.09316	0.50278	-4.16316	3.1387e-05	0.000270625	18.6007	27.094	6.01821	4.85976	72.5713	88.0518	36.4357	43.6659
1112	ENSECAG00000020463	4659.01	-1.08266	0.260348	-4.15852	3.20318e-05	0.000275439	1894.79	3585.44	3511.2	2960.56	4842.87	4657.28	8651.82	7168.1
1114	ENSECAG00000020307	34.3706	1.3209	0.317787	4.15655	3.23089e-05	0.000277323	47.1219	34.4833	54.1639	60.261	18.5647	14.2019	23.1864	22.9821
1115	ENSECAG00000033926	83.0652	-3.46917	0.834824	-4.15558	3.24466e-05	0.000278255	33.4813	4.10516	10.3169	7.77561	84.3852	72.9031	367.669	83.8845
1116	ENSECAG00000008499	105.912	1.34835	0.324635	4.15343	3.27532e-05	0.000280633	159.966	175.701	99.7304	173.007	37.9733	95.6262	38.6439	66.6479
1117	ENSECAG00000015906	29.1628	-1.63138	0.392859	-4.15258	3.28755e-05	0.000281428	18.6007	14.7786	12.8962	10.6915	28.691	28.4038	62.9344	56.306
1118	ENSECAG00000025090	13.8963	2.11855	0.510671	4.14857	3.34562e-05	0.000285995	33.4813	21.3468	14.6157	21.3829	5.06311	8.52115	3.31234	3.44731
1120	ENSECAG00000021746	35.1579	2.24113	0.540294	4.14798	3.35426e-05	0.00028637	8.68034	82.1032	56.7431	84.5598	13.5016	14.2019	8.8329	12.6401
1121	ENSECAG00000019631	83.2701	1.16829	0.28174	4.1467	3.37307e-05	0.000287719	69.4427	151.07	134.12	105.943	48.0996	65.3288	50.7892	41.3677
1122	ENSECAG00000039947	17.3986	1.77096	0.427099	4.14649	3.37618e-05	0.000287728	31.0012	20.5258	28.3716	28.1866	11.8139	5.68076	4.41645	9.19282
1123	ENSECAG00000009256	61.8482	-1.16857	0.281842	-4.14619	3.38058e-05	0.000287846	21.0808	45.9778	50.7249	33.0463	76.7905	97.5198	94.9537	74.6917
1124	ENSECAG00000013154	12.8086	-2.69636	0.650593	-4.14447	3.40597e-05	0.00028975	1.24005	7.38928	0.859745	3.88781	40.5049	17.0423	15.4576	16.0874
1126	ENSECAG00000007302	9.57814	2.42987	0.587042	4.13917	3.48566e-05	0.000296002	19.8408	16.4206	12.8962	15.5512	3.37541	2.84038	1.10411	4.59641
1127	ENSECAG00000013770	18.1713	1.69798	0.410248	4.13891	3.48958e-05	0.000296072	21.0808	34.4833	25.7923	29.1585	5.06311	9.46794	8.8329	11.491
1128	ENSECAG00000014328	4.7783	-5.00488	1.20946	-4.13811	3.50181e-05	0.000296846	0	0	0	0.971951	7.59467	16.0955	5.52056	8.04372
1131	ENSECAG00000000487	52.7195	1.12516	0.272122	4.13478	3.55292e-05	0.000300381	58.2823	73.0718	85.1147	72.8964	37.1295	35.9782	39.748	19.5347
1133	ENSECAG00000019504	3.29326	-5.21392	1.26414	-4.1245	3.71545e-05	0.000313567	0	0	0	0	5.90697	5.68076	4.41645	10.3419
1134	ENSECAG00000009472	47.3261	2.3541	0.570919	4.12335	3.73403e-05	0.000314857	26.041	130.544	82.5355	77.7561	9.28237	37.8718	8.8329	5.74551
1135	ENSECAG00000015324	45.2627	1.24234	0.301337	4.12275	3.74379e-05	0.000315402	91.7636	58.2932	55.8834	48.5976	21.0963	24.6166	33.1234	28.7276
1136	ENSECAG00000022776	4.71449	-4.98046	1.20974	-4.11695	3.83918e-05	0.000323154	1.24005	0	0	0	14.3455	8.52115	4.41645	9.19282
1137	ENSECAG00000013817	8.93912	-4.14854	1.00873	-4.11263	3.91174e-05	0.000328403	1.24005	0.821032	0.859745	0.971951	5.90697	43.5525	5.52056	12.6401
1138	ENSECAG00000018961	26.2094	2.92081	0.710147	4.11296	3.90617e-05	0.000328403	31.0012	3.28413	73.938	76.7842	5.06311	3.78718	6.62467	9.19282
1139	ENSECAG00000023738	64.5041	-1.14228	0.277749	-4.11263	3.91184e-05	0.000328403	63.2425	27.9151	33.53	37.9061	82.6975	84.2647	104.891	81.5863
1140	ENSECAG00000004904	14.992	1.8044	0.439058	4.10972	3.96141e-05	0.000332272	19.8408	23.8099	21.4936	28.1866	6.75082	7.57435	8.8329	3.44731
1143	ENSECAG00000000607	20.8714	1.89587	0.461521	4.10787	3.99324e-05	0.000334063	49.6019	22.1679	40.408	19.439	9.28237	4.73397	12.1452	9.19282
1144	ENSECAG00000021845	17.3641	1.63957	0.399624	4.10279	4.08191e-05	0.000341182	23.5609	27.094	30.0911	24.2988	9.28237	7.57435	5.52056	11.491
1148	ENSECAG00000012255	9.65724	-2.77526	0.677669	-4.0953	4.21616e-05	0.000351175	4.96019	0	3.43898	1.9439	17.7209	12.3083	25.3946	11.491
1149	ENSECAG00000015330	48.4177	-1.09258	0.266818	-4.09483	4.2247e-05	0.00035158	22.3209	41.0516	30.0911	29.1585	71.7274	55.8608	75.0796	62.0515
1150	ENSECAG00000007508	19.0716	1.70096	0.415415	4.0946	4.22891e-05	0.000351625	33.4813	22.9889	36.969	23.3268	9.28237	9.46794	4.41645	12.6401
1151	ENSECAG00000005097	53.8912	-1.0505	0.256632	-4.09343	4.25047e-05	0.000353111	35.9614	30.3782	38.6885	34.9902	59.0697	59.648	83.9125	88.4809
1152	ENSECAG00000008203	9.41284	-2.82462	0.690374	-4.09143	4.28719e-05	0.000355658	2.4801	5.74722	0.859745	0	17.7209	12.3083	14.3535	21.8329
1154	ENSECAG00000013233	16.6678	1.74249	0.426197	4.08847	4.34225e-05	0.000359797	24.801	18.8837	30.9508	28.1866	10.1262	5.68076	5.52056	9.19282
1155	ENSECAG00000000887	50.7056	-1.3245	0.324398	-4.08295	4.44673e-05	0.000368136	47.1219	30.3782	16.3351	23.3268	83.5414	73.8499	54.1015	76.9899
1156	ENSECAG00000003783	35.2902	-1.389	0.340411	-4.08036	4.49654e-05	0.000371616	32.2413	13.1365	15.4754	18.4671	41.3488	63.4352	43.0604	55.1569
1157	ENSECAG00000017081	14.6361	-1.95273	0.478547	-4.08055	4.49301e-05	0.000371616	7.44029	7.38928	1.71949	7.77561	19.4086	29.3506	19.874	24.1312
1158	ENSECAG00000015655	43.8545	1.18695	0.291002	4.07884	4.52602e-05	0.000373729	69.4427	45.1567	74.7978	54.4293	29.5348	18.9359	29.811	28.7276
1159	ENSECAG00000007941	62.7997	-1.12727	0.276493	-4.07702	4.56165e-05	0.000376346	26.041	59.1143	32.6703	38.8781	90.2922	94.6794	88.329	72.3935
1160	ENSECAG00000000384	12.1988	2.1266	0.521764	4.0758	4.58569e-05	0.000378003	22.3209	24.6309	13.7559	18.4671	4.21926	2.84038	3.31234	8.04372
1162	ENSECAG00000013724	17.192	1.65343	0.405954	4.07294	4.64238e-05	0.000381361	24.801	28.7361	22.3534	28.1866	5.06311	10.4147	9.93701	8.04372
1163	ENSECAG00000019364	6.87068	-4.20463	1.03226	-4.07323	4.63656e-05	0.000381361	0	0.821032	0	1.9439	11.8139	19.8827	4.41645	16.0874
1165	ENSECAG00000010800	53.7854	-1.13495	0.278679	-4.07261	4.64892e-05	0.000381571	31.0012	47.6198	26.6521	29.1585	81.0098	89.9454	65.1426	59.7533
1167	ENSECAG00000023651	4.55902	-4.92736	1.21211	-4.06511	4.80088e-05	0.000393368	0	0	0.859745	0	4.21926	12.3083	11.0411	8.04372
1168	ENSECAG00000012932	28.0399	1.50159	0.369513	4.0637	4.83011e-05	0.000394904	24.801	55.0091	49.0054	36.9342	16.877	17.0423	15.4576	9.19282
1170	ENSECAG00000023445	28.7894	-1.51272	0.372261	-4.06361	4.83202e-05	0.000394904	12.4005	21.3468	12.8962	12.6354	43.0365	34.0846	64.0385	29.8767
1172	ENSECAG00000020422	3.42572	-5.29216	1.30274	-4.06235	4.85819e-05	0.000396365	0	0	0	0	13.5016	3.78718	5.52056	4.59641
1173	ENSECAG00000020792	26.527	-1.35697	0.334153	-4.06091	4.88814e-05	0.000398469	21.0808	14.7786	14.6157	9.71951	35.4418	43.5525	40.8522	32.1749
1175	ENSECAG00000019837	207.845	1.20659	0.297247	4.0592	4.92403e-05	0.000401033	360.854	168.311	364.532	267.287	174.677	88.0518	140.222	98.8228
1177	ENSECAG00000000066	759.44	1.00622	0.24807	4.05619	4.98807e-05	0.000404546	794.871	1151.91	1005.9	1102.19	312.225	625.831	419.563	663.032
1178	ENSECAG00000012179	9.30166	-2.66499	0.657008	-4.05625	4.98672e-05	0.000404546	1.24005	3.28413	4.29872	0.971951	23.6279	10.4147	11.0411	19.5347
1181	ENSECAG00000009333	54.8217	-1.45042	0.358235	-4.04879	5.14833e-05	0.000416836	43.4017	23.8099	27.5118	23.3268	37.9733	87.105	110.411	85.0336
1182	ENSECAG00000000943	425.303	1.57913	0.390175	4.04723	5.18263e-05	0.000419258	802.312	1107.57	377.428	262.427	307.162	181.784	182.179	181.558
1183	ENSECAG00000012742	52.6777	-1.47179	0.363856	-4.04499	5.23258e-05	0.00042268	34.7214	25.452	34.3898	17.4951	113.92	49.2333	49.6851	96.5246
1185	ENSECAG00000007113	33.0641	1.2991	0.321456	4.0413	5.31556e-05	0.000428923	54.5621	39.4095	46.4262	48.5976	24.4717	22.7231	9.93701	18.3856
1186	ENSECAG00000001603	6.56195	-3.67511	0.909873	-4.03915	5.3646e-05	0.000432515	1.24005	0.821032	0	1.9439	20.2525	11.3615	8.8329	8.04372
1187	ENSECAG00000011942	279.013	1.07192	0.265469	4.03782	5.39499e-05	0.000434599	593.983	276.688	367.111	276.034	173.834	218.709	155.68	170.067
1188	ENSECAG00000007148	78.6133	1.30009	0.322119	4.03607	5.43537e-05	0.000437483	75.643	103.45	131.541	136.073	33.7541	58.7012	25.3946	64.3497
1190	ENSECAG00000014126	4.95108	-5.07615	1.25835	-4.03398	5.48395e-05	0.000440652	0	0.821032	0	0	21.0963	7.57435	5.52056	4.59641
1191	ENSECAG00000016904	19.1871	-1.86302	0.461914	-4.03327	5.50072e-05	0.000441628	6.20024	4.10516	12.8962	9.71951	19.4086	43.5525	24.2905	33.324
1192	ENSECAG00000034300	20.0323	-1.58663	0.393695	-4.03009	5.5756e-05	0.000447264	4.96019	12.3155	11.1767	10.6915	23.6279	27.457	29.811	40.2186
1194	ENSECAG00000015275	186.458	-1.85026	0.459443	-4.02718	5.64509e-05	0.00045208	37.2015	29.5571	150.455	105.943	182.272	199.774	383.127	403.335
1195	ENSECAG00000015182	51.6459	1.27889	0.317899	4.02295	5.74742e-05	0.00045989	58.2823	102.629	60.1821	71.9244	34.5979	40.7121	27.6028	17.2365
1197	ENSECAG00000000518	6.86556	3.32023	0.825857	4.02034	5.81131e-05	0.000464225	13.6405	17.2417	11.1767	7.77561	1.6877	0	1.10411	2.29821
1198	ENSECAG00000017346	7.87032	-2.86735	0.713703	-4.01757	5.88013e-05	0.000469331	2.4801	2.46309	1.71949	0.971951	19.4086	6.62756	14.3535	14.9383
1199	ENSECAG00000021265	15.6371	-2.14624	0.5345	-4.01542	5.93405e-05	0.000473239	11.1604	3.28413	2.57923	6.80366	12.6578	32.191	25.3946	31.0258
1200	ENSECAG00000024240	64.3423	-1.0803	0.269289	-4.01169	6.02861e-05	0.00048038	28.5211	60.7563	36.969	37.9061	88.6045	94.6794	96.0578	71.2444
1201	ENSECAG00000012173	60.6308	1.21451	0.302882	4.00986	6.07558e-05	0.000483719	124.005	89.4924	64.4808	62.2049	45.568	40.7121	28.7069	29.8767
1202	ENSECAG00000019677	21.5973	-2.01499	0.502613	-4.00903	6.09675e-05	0.000485001	16.1206	7.38928	8.59745	2.91585	54.8504	18.9359	37.5398	26.4294
1203	ENSECAG00000021296	6.88644	3.03828	0.758345	4.00646	6.1636e-05	0.000489911	8.68034	15.5996	12.0364	12.6354	0.843852	1.89359	1.10411	2.29821
1204	ENSECAG00000006289	288.799	1.01497	0.25354	4.00321	6.24884e-05	0.000496046	450.138	278.33	456.524	359.622	136.704	148.647	223.031	257.399
1206	ENSECAG00000016692	57.3436	-1.98645	0.496337	-4.00221	6.27541e-05	0.000497558	52.082	9.03135	18.0546	14.5793	44.7242	103.201	143.535	73.5426
1208	ENSECAG00000015424	48.6505	1.51946	0.379738	4.00134	6.29858e-05	0.000498568	28.5211	110.839	73.938	74.8403	27.8471	24.6166	19.874	28.7276
1210	ENSECAG00000016384	9.2191	2.66174	0.665415	4.00013	6.33088e-05	0.000500297	11.1604	19.7048	11.1767	21.3829	2.53156	0.946794	1.10411	5.74551
1211	ENSECAG00000033460	6.37086	-3.57897	0.894875	-3.9994	6.35028e-05	0.000501415	2.4801	0	0.859745	0.971951	10.1262	8.52115	17.6658	10.3419
1212	ENSECAG00000007018	18.1662	-1.65022	0.412885	-3.9968	6.42037e-05	0.000506531	11.1604	11.4944	6.01821	6.80366	37.1295	26.5102	22.0822	24.1312
1213	ENSECAG00000010367	72.9126	1.41554	0.354258	3.99578	6.44807e-05	0.000508297	64.4825	142.859	79.0965	138.017	42.1926	57.7544	20.9781	37.9204
1215	ENSECAG00000016058	33.398	-1.13795	0.285063	-3.99192	6.55409e-05	0.000515804	14.8806	19.7048	24.9326	23.3268	47.2557	43.5525	45.2686	48.2623
1218	ENSECAG00000029381	22.8027	1.55143	0.38906	3.98765	6.67319e-05	0.000523883	31.0012	32.0202	38.6885	34.9902	18.5647	10.4147	12.1452	4.59641
1222	ENSECAG00000025086	8.91565	2.45471	0.617189	3.97724	6.97192e-05	0.000545544	13.6405	19.7048	10.3169	16.5232	2.53156	1.89359	4.41645	2.29821
1223	ENSECAG00000021331	6.09522	-3.98566	1.00221	-3.97688	6.98256e-05	0.00054593	1.24005	0.821032	0	0.971951	5.90697	16.0955	9.93701	13.7892
1227	ENSECAG00000025149	15.4571	2.17428	0.547567	3.97079	7.16336e-05	0.00055824	7.44029	36.1254	27.5118	30.1305	5.90697	7.57435	5.52056	3.44731
1228	ENSECAG00000000122	6.98961	-3.07961	0.775877	-3.96919	7.21165e-05	0.000561546	3.72015	0.821032	0.859745	0.971951	8.43852	14.2019	16.5617	10.3419
1230	ENSECAG00000015212	6.13126	-4.01797	1.01341	-3.96482	7.34514e-05	0.00057101	1.24005	1.64206	0	0	6.75082	17.9891	9.93701	11.491
1231	ENSECAG00000034383	18.7641	1.89887	0.479148	3.96302	7.40075e-05	0.000574866	21.0808	18.8837	48.1457	30.1305	10.1262	4.73397	5.52056	11.491
1232	ENSECAG00000001853	40.4684	-1.21697	0.30723	-3.96111	7.46029e-05	0.000578589	34.7214	17.2417	22.3534	24.2988	56.5381	64.382	65.1426	39.0695
1233	ENSECAG00000017720	84.7985	1.05879	0.267297	3.96109	7.46079e-05	0.000578589	106.644	81.2821	155.614	114.69	61.6012	45.4461	44.1645	68.9462
1234	ENSECAG00000012858	15.5782	-2.01641	0.509785	-3.95542	7.64003e-05	0.00059201	3.72015	4.92619	5.15847	10.6915	13.5016	28.4038	37.5398	20.6838
1235	ENSECAG00000037284	53.017	-1.03268	0.261217	-3.95333	7.70697e-05	0.000596713	33.4813	38.5885	34.3898	33.0463	81.0098	89.9454	58.518	55.1569
1236	ENSECAG00000010434	27.9481	1.2324	0.312093	3.94884	7.85293e-05	0.000607522	39.6816	46.7988	35.2495	34.9902	15.1893	18.9359	14.3535	18.3856
1238	ENSECAG00000009516	5.54055	-4.45525	1.12899	-3.94622	7.93954e-05	0.000612268	1.24005	0	0	0.971951	12.6578	10.4147	12.1452	6.89462
1239	ENSECAG00000011662	23.0266	-1.45041	0.367546	-3.94621	7.93989e-05	0.000612268	13.6405	13.1365	9.45719	13.6073	46.4119	35.0314	26.4987	26.4294
1240	ENSECAG00000023638	8.526	2.88717	0.731594	3.94641	7.93303e-05	0.000612268	11.1604	24.6309	10.3169	13.6073	1.6877	0	2.20822	4.59641
1241	ENSECAG00000021592	3.35818	5.15781	1.30761	3.94445	7.99831e-05	0.000616276	13.6405	4.92619	3.43898	4.85976	0	0	0	0
1242	ENSECAG00000017730	11.8185	2.08695	0.529257	3.94317	8.04125e-05	0.000619086	18.6007	22.1679	17.1949	18.4671	1.6877	8.52115	3.31234	4.59641
1246	ENSECAG00000010558	17.8381	2.23994	0.568843	3.93772	8.22601e-05	0.000631277	62.0024	13.9575	26.6521	15.5512	7.59467	5.68076	5.52056	5.74551
1247	ENSECAG00000017802	516.75	2.86869	0.72889	3.9357	8.29559e-05	0.000636106	1392.57	239.741	1228.57	775.617	249.78	35.9782	133.598	78.139
1249	ENSECAG00000016552	19.9258	-1.42695	0.362686	-3.93438	8.34104e-05	0.000638567	12.4005	9.85238	9.45719	11.6634	24.4717	27.457	34.2275	29.8767
1250	ENSECAG00000036610	5.62608	-4.48873	1.14097	-3.93413	8.3497e-05	0.000638719	1.24005	0.821032	0	0	10.9701	8.52115	16.5617	6.89462
1253	ENSECAG00000008296	20.9674	1.55958	0.397003	3.92837	8.55237e-05	0.000652656	23.5609	37.7675	37.8288	25.2707	7.59467	7.57435	14.3535	13.7892
1254	ENSECAG00000017630	15.8898	-1.8467	0.47022	-3.92731	8.59023e-05	0.000655022	4.96019	6.56825	2.57923	13.6073	24.4717	26.5102	24.2905	24.1312
1255	ENSECAG00000008755	39.5311	-1.0638	0.271238	-3.92201	8.78129e-05	0.000669057	24.801	22.1679	29.2313	26.2427	55.6942	54.9141	61.8303	41.3677
1256	ENSECAG00000000847	63.0074	1.73818	0.443501	3.91923	8.88329e-05	0.00067629	137.645	118.229	67.9198	65.1207	45.568	43.5525	9.93701	16.0874
1257	ENSECAG00000006542	51.9896	1.23018	0.313928	3.91867	8.90404e-05	0.000676391	86.8034	63.2194	82.5355	59.289	37.1295	25.5634	16.5617	44.815
1258	ENSECAG00000007548	2.88808	-5.02818	1.28315	-3.91862	8.90584e-05	0.000676391	0	0	0	0	4.21926	7.57435	4.41645	6.89462
1259	ENSECAG00000023173	7.24118	-3.47506	0.8868	-3.91865	8.90451e-05	0.000676391	2.4801	1.64206	0.859745	0	11.8139	26.5102	7.72879	6.89462
1260	ENSECAG00000010809	8.48401	3.67368	0.938629	3.91388	9.08264e-05	0.000689271	26.041	23.8099	10.3169	2.91585	0.843852	2.84038	1.10411	0
1261	ENSECAG00000033788	81.7266	-1.63736	0.418553	-3.91195	9.15525e-05	0.000694231	14.8806	25.452	66.2003	51.5134	81.8537	88.0518	181.074	144.787
1263	ENSECAG00000031569	92.9038	1.29554	0.331261	3.91094	9.19385e-05	0.000696054	116.565	171.596	132.401	107.887	45.568	90.8922	51.8933	26.4294
1264	ENSECAG00000019952	41.5373	1.16179	0.297101	3.91042	9.21376e-05	0.000697009	53.3221	51.725	68.7796	56.3732	37.1295	18.9359	26.4987	19.5347
1265	ENSECAG00000000721	6.17194	-3.58942	0.918196	-3.90921	9.25999e-05	0.000699953	0	0	1.71949	1.9439	8.43852	12.3083	7.72879	17.2365
1266	ENSECAG00000010553	25.0797	1.34073	0.342987	3.90897	9.26898e-05	0.000700079	26.041	42.6936	39.5482	34.9902	14.3455	10.4147	17.6658	14.9383
1267	ENSECAG00000017581	123.69	-1.18995	0.304704	-3.90528	9.41163e-05	0.000710292	37.2015	76.3559	82.5355	103.999	134.172	133.498	196.532	225.224
1268	ENSECAG00000024979	30.8974	1.77259	0.454334	3.90153	9.55881e-05	0.000720831	28.5211	61.5774	49.0054	51.5134	3.37541	21.7763	18.7699	12.6401
1270	ENSECAG00000010965	42.0978	1.09104	0.279938	3.89745	9.72114e-05	0.000731918	66.9626	40.2305	67.0601	55.4012	27.8471	27.457	25.3946	26.4294
1271	ENSECAG00000018133	11.3816	2.04063	0.523925	3.8949	9.82408e-05	0.000739087	23.5609	14.7786	20.6339	14.5793	6.75082	2.84038	3.31234	4.59641
1274	ENSECAG00000014162	6.24641	-3.64715	0.936939	-3.89262	9.9167e-05	0.000744283	0	2.46309	0	0.971951	9.28237	17.9891	6.62467	12.6401
1275	ENSECAG00000022028	39.9863	1.00022	0.256965	3.89244	9.92429e-05	0.000744283	53.3221	46.7988	55.8834	57.3451	27.8471	24.6166	26.4987	27.5785
1277	ENSECAG00000021622	11.9644	1.93999	0.499011	3.88767	0.000101211	0.000757855	22.3209	20.5258	20.6339	12.6354	5.06311	6.62756	3.31234	4.59641
1278	ENSECAG00000024957	14.9113	-2.49672	0.642301	-3.88715	0.000101427	0.000758877	7.44029	0.821032	2.57923	7.77561	46.4119	11.3615	18.7699	24.1312
1279	ENSECAG00000021472	19.8343	1.53872	0.395935	3.88629	0.00010179	0.000760996	37.2015	35.3044	20.6339	25.2707	12.6578	8.52115	11.0411	8.04372
1280	ENSECAG00000014843	25.7318	1.33134	0.342616	3.88581	0.000101988	0.000761848	28.5211	29.5571	47.286	41.7939	14.3455	15.1487	16.5617	12.6401
1282	ENSECAG00000015381	53.8247	1.22985	0.316725	3.88303	0.000103162	0.000769451	101.684	45.1567	81.6757	73.8683	38.8172	22.7231	27.6028	39.0695
1283	ENSECAG00000022062	3.62435	-5.36473	1.38183	-3.88234	0.000103455	0.000771037	0	0	0	0	12.6578	1.89359	12.1452	2.29821
1286	ENSECAG00000010033	28.2672	-1.42584	0.367498	-3.87987	0.000104514	0.000776632	21.0808	15.5996	14.6157	10.6915	43.0365	53.9673	44.1645	22.9821
1287	ENSECAG00000018736	109.829	1.16525	0.300336	3.87983	0.000104531	0.000776632	147.566	239.741	91.9927	128.298	61.6012	84.2647	58.518	66.6479
1288	ENSECAG00000019894	229.12	1.09304	0.281871	3.8778	0.000105406	0.000782522	482.379	193.763	300.911	271.174	128.266	114.562	182.179	159.725
1290	ENSECAG00000016187	33.8974	-1.19842	0.309302	-3.87461	0.000106795	0.000791604	23.5609	26.273	17.1949	15.5512	50.6311	54.9141	48.5809	34.4731
1291	ENSECAG00000018830	8.19167	-3.39912	0.877333	-3.87438	0.000106897	0.000791751	0	0.821032	1.71949	2.91585	5.90697	6.62756	17.6658	29.8767
1292	ENSECAG00000007050	21.6047	-1.53603	0.396689	-3.87213	0.000107889	0.000797864	21.0808	9.03135	8.59745	6.80366	33.7541	35.0314	29.811	28.7276
1299	ENSECAG00000016432	72.7905	1.14364	0.296389	3.85857	0.000114054	0.000839557	63.2425	96.0607	138.419	102.055	43.0365	30.2974	55.2056	54.0078
1300	ENSECAG00000009168	29.3327	-2.12728	0.551602	-3.85655	0.000114998	0.000845836	3.72015	27.094	3.43898	8.74756	61.6012	54.9141	45.2686	29.8767
1301	ENSECAG00000011529	2.82873	-4.98928	1.29378	-3.85637	0.000115084	0.000845836	0	0	0	0	4.21926	3.78718	7.72879	6.89462
1302	ENSECAG00000038588	6.80226	3.68761	0.956323	3.85603	0.000115242	0.00084635	24.801	11.4944	7.7377	6.80366	1.6877	1.89359	0	0
1304	ENSECAG00000022100	9.56518	-2.55227	0.66221	-3.85417	0.000116123	0.00085151	0	3.28413	3.43898	3.88781	9.28237	10.4147	22.0822	24.1312
1306	ENSECAG00000021570	16.6563	1.59348	0.413963	3.84932	0.000118445	0.000867209	24.801	27.094	21.4936	27.2146	12.6578	7.57435	5.52056	6.89462
1307	ENSECAG00000013084	9.79185	-2.33794	0.607563	-3.84806	0.000119056	0.000871012	2.4801	5.74722	2.57923	1.9439	21.0963	19.8827	16.5617	8.04372
1308	ENSECAG00000038089	3.92231	-4.69995	1.22147	-3.84778	0.000119194	0.000871353	0	0	0	0.971951	4.21926	10.4147	7.72879	8.04372
1311	ENSECAG00000029436	2.77317	-4.98368	1.29649	-3.84398	0.000121056	0.000882942	0	0	0	0	8.43852	4.73397	4.41645	4.59641
1312	ENSECAG00000007324	4.25096	-4.842	1.26002	-3.8428	0.000121638	0.000886513	0	0	0	0.971951	10.9701	14.2019	4.41645	3.44731
1313	ENSECAG00000022576	173.694	-1.09432	0.284794	-3.84248	0.000121795	0.00088698	172.367	68.1456	104.029	100.111	178.053	210.188	298.11	258.548
1314	ENSECAG00000002513	8.82631	2.83079	0.73711	3.84039	0.00012284	0.000893907	4.96019	24.6309	12.0364	20.411	2.53156	3.78718	1.10411	1.1491
1315	ENSECAG00000022919	119.735	1.71668	0.447267	3.83816	0.000123958	0.00090136	386.895	76.3559	159.053	112.746	75.9467	32.191	61.8303	52.8587
1316	ENSECAG00000012002	17.8014	-1.74969	0.455895	-3.83792	0.000124081	0.000901568	7.44029	13.1365	8.59745	2.91585	21.9402	20.8295	34.2275	33.324
1317	ENSECAG00000020488	21.4433	-1.48377	0.386871	-3.83531	0.000125406	0.0009105	9.92039	9.85238	12.0364	13.6073	43.0365	36.925	23.1864	22.9821
1321	ENSECAG00000016434	28.8085	-1.45543	0.379895	-3.83114	0.000127551	0.000923274	16.1206	11.4944	12.8962	21.3829	46.4119	29.3506	62.9344	29.8767
1322	ENSECAG00000012495	14.7055	-1.95255	0.509741	-3.83049	0.000127891	0.000925031	9.92039	8.21032	2.57923	3.88781	20.2525	30.2974	28.7069	13.7892
1323	ENSECAG00000017695	32.7949	-1.20077	0.313943	-3.82479	0.000130883	0.000945962	13.6405	29.5571	18.0546	17.4951	52.3188	43.5525	46.3727	41.3677
1324	ENSECAG00000024728	70.147	-1.16094	0.303586	-3.82407	0.000131265	0.000948006	57.0422	54.1881	30.0911	33.0463	120.671	118.349	67.3508	80.4372
1326	ENSECAG00000000106	94.9744	1.10748	0.289715	3.82265	0.000132024	0.000952047	200.888	130.544	81.6757	106.915	61.6012	70.0628	54.1015	54.0078
1327	ENSECAG00000010123	5.50343	-3.9028	1.02105	-3.82234	0.000132193	0.000952548	0	2.46309	0	0	10.1262	12.3083	9.93701	9.19282
1329	ENSECAG00000012118	15.3142	-1.65312	0.432566	-3.82165	0.000132561	0.000953045	9.92039	9.03135	6.87796	3.88781	20.2525	26.5102	26.4987	19.5347
1330	ENSECAG00000019355	21.5979	1.5998	0.418587	3.82192	0.000132417	0.000953045	29.7612	27.094	40.408	33.0463	18.5647	4.73397	8.8329	10.3419
1331	ENSECAG00000011497	37.0806	-1.22145	0.319938	-3.81776	0.000134668	0.000967462	17.3607	20.5258	17.1949	34.0183	65.8205	43.5525	44.1645	54.0078
1332	ENSECAG00000015355	42.5163	1.34007	0.351277	3.81485	0.000136264	0.000978197	85.5634	48.4409	36.1093	73.8683	16.0332	29.3506	23.1864	27.5785
1333	ENSECAG00000022789	8.13595	-2.38028	0.624123	-3.8138	0.000136843	0.000981619	2.4801	1.64206	2.57923	3.88781	11.8139	17.9891	14.3535	10.3419
1334	ENSECAG00000013547	8.0814	2.63973	0.692198	3.81355	0.000136984	0.00098189	8.68034	21.3468	12.8962	12.6354	0.843852	3.78718	3.31234	1.1491
1338	ENSECAG00000013779	27.8198	-1.46399	0.385167	-3.80093	0.000144156	0.00103021	4.96019	15.5996	13.7559	24.2988	48.9434	39.7653	43.0604	32.1749
1340	ENSECAG00000011461	187.288	-1.08445	0.285553	-3.79771	0.000146037	0.00104132	195.928	73.8928	110.047	102.055	232.903	213.975	321.297	248.206
1342	ENSECAG00000015508	20.9987	-1.5274	0.402473	-3.79503	0.000147624	0.00105185	9.92039	9.85238	16.3351	6.80366	21.0963	38.8186	36.4357	28.7276
1343	ENSECAG00000035078	16.0503	-1.75062	0.461452	-3.79372	0.000148404	0.00105662	6.20024	2.46309	12.8962	7.77561	22.784	25.5634	24.2905	26.4294
1345	ENSECAG00000017295	10.6065	2.15499	0.568895	3.78802	0.000151852	0.00107956	11.1604	13.9575	24.9326	19.439	5.06311	4.73397	4.41645	1.1491
1347	ENSECAG00000009182	19.9547	1.73952	0.459319	3.78717	0.000152375	0.00108167	12.4005	37.7675	26.6521	45.6817	9.28237	7.57435	9.93701	10.3419
1348	ENSECAG00000018191	2.88656	4.96272	1.31106	3.78526	0.00015355	0.0010892	6.20024	2.46309	8.59745	5.83171	0	0	0	0
1349	ENSECAG00000012307	14.4989	-1.9223	0.508782	-3.77824	0.000157941	0.00111952	7.44029	6.56825	3.43898	6.80366	13.5016	15.1487	30.9151	32.1749
1350	ENSECAG00000023888	24.2526	1.65123	0.437573	3.7736	0.000160909	0.00113887	19.8408	49.2619	26.6521	51.5134	14.3455	12.3083	14.3535	5.74551
1351	ENSECAG00000043058	18.8413	-1.66812	0.442041	-3.77368	0.000160856	0.00113887	7.44029	7.38928	10.3169	10.6915	29.5348	13.2551	35.3316	36.7713
1356	ENSECAG00000035229	25.8944	1.46821	0.389514	3.76934	0.000163682	0.00115422	38.4415	56.6512	22.3534	34.9902	15.1893	17.0423	12.1452	10.3419
1357	ENSECAG00000037942	45.5168	1.58756	0.421301	3.76824	0.000164406	0.00115847	27.2811	78.819	83.3952	82.6159	12.6578	16.0955	26.4987	36.7713
1358	ENSECAG00000010280	6.0473	3.93735	1.04493	3.76805	0.000164531	0.0011585	3.72015	16.4206	15.4754	9.71951	0	1.89359	0	1.1491
1359	ENSECAG00000010257	37.8262	-1.11026	0.294782	-3.76638	0.000165631	0.00116539	21.0808	17.2417	30.0911	27.2146	50.6311	46.3929	65.1426	44.815
1360	ENSECAG00000013439	6.34947	2.90932	0.773313	3.76216	0.000168454	0.00118438	12.4005	11.4944	10.3169	10.6915	0.843852	2.84038	2.20822	0
1361	ENSECAG00000019602	5.54568	-3.39606	0.902774	-3.76181	0.000168688	0.00118515	1.24005	0	0.859745	1.9439	11.8139	9.46794	12.1452	6.89462
1363	ENSECAG00000035691	9.07319	-2.45705	0.653862	-3.75776	0.000171444	0.00120275	0	3.28413	2.57923	4.85976	11.8139	10.4147	14.3535	25.2803
1364	ENSECAG00000000135	39.9617	1.28521	0.342118	3.75663	0.000172213	0.00120726	31.0012	58.2932	74.7978	62.2049	19.4086	32.191	17.6658	24.1312
1366	ENSECAG00000016019	3.07303	-5.12496	1.36628	-3.75102	0.000176116	0.00123281	0	0	0	0	3.37541	13.2551	2.20822	5.74551
1367	ENSECAG00000023961	56.0093	1.89477	0.50554	3.74801	0.000178244	0.0012468	23.5609	166.669	70.4991	92.3354	20.2525	37.8718	25.3946	11.491
1368	ENSECAG00000019162	16.3825	1.88789	0.50376	3.7476	0.000178538	0.00124794	21.0808	37.7675	11.1767	33.0463	7.59467	5.68076	5.52056	9.19282
1369	ENSECAG00000010185	5.73961	3.37131	0.900794	3.7426	0.000182129	0.00127211	8.68034	10.6734	7.7377	14.5793	0.843852	0	1.10411	2.29821
1370	ENSECAG00000014953	20.9775	2.27321	0.607461	3.74215	0.00018245	0.00127342	7.44029	65.6825	24.9326	40.822	4.21926	12.3083	5.52056	6.89462
1371	ENSECAG00000020479	54.3783	-1.03382	0.276282	-3.74191	0.000182626	0.00127372	38.4415	43.5147	32.6703	28.1866	75.1028	73.8499	93.8495	49.4114
1372	ENSECAG00000034339	219.75	-1.05551	0.282128	-3.74126	0.0001831	0.00127609	110.364	235.636	133.26	90.3915	247.249	333.271	311.36	296.468
1373	ENSECAG00000012082	46.2222	-1.15877	0.310008	-3.73787	0.000185589	0.0012925	28.5211	23.8099	30.9508	31.1024	44.7242	78.5839	86.1208	45.9641
1374	ENSECAG00000012395	2.62165	-4.89054	1.30876	-3.73677	0.000186398	0.00129719	0	0	0	0	5.06311	4.73397	7.72879	3.44731
1375	ENSECAG00000024988	38.4777	1.433	0.383514	3.7365	0.000186602	0.00129766	81.8432	40.2305	64.4808	38.8781	26.1594	25.5634	8.8329	21.8329
1376	ENSECAG00000008228	2.72835	4.86926	1.30324	3.73627	0.000186773	0.00129791	7.44029	3.28413	4.29872	6.80366	0	0	0	0
1379	ENSECAG00000022623	43.6246	1.06674	0.285633	3.73467	0.000187962	0.00130333	70.6828	50.904	54.1639	61.2329	37.1295	19.8827	32.0193	22.9821
1380	ENSECAG00000017445	3.6441	-4.60993	1.23471	-3.73361	0.000188755	0.00130788	0	0	0.859745	0	8.43852	7.57435	8.8329	3.44731
1383	ENSECAG00000008149	2.69949	-4.93928	1.32542	-3.72657	0.000194104	0.00134203	0	0	0	0	4.21926	9.46794	3.31234	4.59641
1384	ENSECAG00000013772	8.05428	2.6421	0.710113	3.72067	0.000198693	0.00137201	9.92039	19.7048	10.3169	15.5512	3.37541	0	4.41645	1.1491
1385	ENSECAG00000018769	10.9599	2.09387	0.562774	3.72063	0.000198727	0.00137201	9.92039	19.7048	17.1949	24.2988	3.37541	7.57435	3.31234	2.29821
1386	ENSECAG00000005925	7.91814	2.85864	0.768405	3.72022	0.000199049	0.00137324	4.96019	20.5258	12.8962	17.4951	2.53156	3.78718	0	1.1491
1388	ENSECAG00000011661	49.4367	1.70308	0.458609	3.71358	0.00020435	0.00140676	40.9216	137.112	55.8834	69.0085	27.0033	39.7653	15.4576	10.3419
1389	ENSECAG00000011664	39.2817	-1.73958	0.468427	-3.71367	0.000204275	0.00140676	2.4801	19.7048	15.4754	34.0183	43.0365	82.3711	57.4138	59.7533
1390	ENSECAG00000014813	14.4469	3.15218	0.849256	3.7117	0.000205875	0.00141624	3.72015	57.4722	22.3534	20.411	0.843852	8.52115	1.10411	1.1491
1391	ENSECAG00000018918	12.725	2.24612	0.605446	3.70986	0.000207377	0.00142555	12.4005	24.6309	18.9144	28.1866	1.6877	10.4147	4.41645	1.1491
1392	ENSECAG00000021428	66.0498	1.00965	0.27223	3.70881	0.000208239	0.00143045	73.1629	82.1032	103.169	93.3073	28.691	37.8718	61.8303	48.2623
1393	ENSECAG00000000683	10.6336	2.61289	0.704919	3.70665	0.000210017	0.00144162	13.6405	22.1679	19.7741	17.4951	0	7.57435	4.41645	0
1394	ENSECAG00000033029	7.98102	2.56754	0.692938	3.7053	0.000211142	0.00144831	23.5609	8.21032	11.1767	11.6634	1.6877	1.89359	2.20822	3.44731
1396	ENSECAG00000021897	12.9175	1.86447	0.503578	3.70245	0.000213525	0.00146255	16.1206	24.6309	24.0728	16.5232	9.28237	3.78718	6.62467	2.29821
1397	ENSECAG00000000728	31.2406	-1.35755	0.366709	-3.70199	0.000213913	0.00146417	12.4005	21.3468	22.3534	13.6073	46.4119	67.2224	29.811	36.7713
1399	ENSECAG00000023488	48.7906	1.01607	0.274521	3.70124	0.000214545	0.00146639	66.9626	45.1567	71.3588	77.7561	32.9102	26.5102	38.6439	31.0258
1401	ENSECAG00000013490	27.6796	1.16594	0.315255	3.6984	0.000216965	0.00148081	35.9614	34.4833	38.6885	43.7378	14.3455	16.0955	23.1864	14.9383
1402	ENSECAG00000024660	3.59189	-4.58957	1.24175	-3.69605	0.000218983	0.00149352	0	0	0	0.971951	9.28237	9.46794	4.41645	4.59641
1403	ENSECAG00000024279	12.1308	-1.95042	0.527793	-3.69544	0.00021951	0.00149605	6.20024	4.92619	6.01821	2.91585	21.0963	21.7763	8.8329	25.2803
1405	ENSECAG00000018551	36.2132	-1.31999	0.357432	-3.693	0.000221625	0.00150831	12.4005	34.4833	21.4936	13.6073	64.9766	54.9141	44.1645	43.6659
1406	ENSECAG00000020281	36.1344	1.13362	0.307016	3.69239	0.000222152	0.00151083	57.0422	58.2932	34.3898	49.5695	26.1594	26.5102	19.874	17.2365
1408	ENSECAG00000007242	6.75616	-3.1149	0.844479	-3.68855	0.000225536	0.00153166	1.24005	0.821032	3.43898	0	17.7209	8.52115	16.5617	5.74551
1409	ENSECAG00000022956	11.1683	-2.32042	0.629267	-3.6875	0.000226472	0.00153692	0	1.64206	6.01821	6.80366	15.1893	11.3615	26.4987	21.8329
1411	ENSECAG00000024716	20.5801	1.75262	0.475846	3.68318	0.000230344	0.00156099	13.6405	53.3671	27.5118	32.0744	10.1262	6.62756	13.2493	8.04372
1412	ENSECAG00000017538	33.6051	1.18527	0.321839	3.68281	0.000230681	0.00156216	40.9216	31.1992	54.1639	60.261	18.5647	20.8295	18.7699	24.1312
1413	ENSECAG00000019509	8.79329	-2.58461	0.701951	-3.68204	0.000231375	0.00156575	0	0.821032	6.87796	1.9439	20.2525	12.3083	14.3535	13.7892
1414	ENSECAG00000000638	56.2545	-1.66069	0.451208	-3.68055	0.000232735	0.00157384	33.4813	8.21032	47.286	19.439	103.794	44.4993	105.995	87.3318
1415	ENSECAG00000013735	52.5211	-1.32715	0.360919	-3.67714	0.000235866	0.00159389	43.4017	36.9464	18.9144	21.3829	86.0729	100.36	72.8714	40.2186
1416	ENSECAG00000017783	55.5227	1.63512	0.444842	3.67573	0.000237174	0.0016007	23.5609	144.502	73.938	93.3073	19.4086	26.5102	34.2275	28.7276
1417	ENSECAG00000025179	5.10105	-3.74775	1.01961	-3.67569	0.000237209	0.0016007	0	0	0.859745	1.9439	10.1262	13.2551	7.72879	6.89462
1418	ENSECAG00000017407	17.5103	-2.06634	0.562196	-3.67547	0.000237408	0.00160091	0	12.3155	5.15847	8.74756	19.4086	43.5525	19.874	31.0258
1419	ENSECAG00000009643	6.39082	-2.99398	0.814997	-3.67361	0.000239146	0.00161149	0	0	1.71949	3.88781	9.28237	11.3615	9.93701	14.9383
1420	ENSECAG00000019242	196.444	1.09357	0.298103	3.66844	0.000244031	0.0016421	250.49	197.048	339.599	281.866	83.5414	87.105	202.053	129.849
1421	ENSECAG00000024519	22.7593	1.91818	0.522877	3.66852	0.00024396	0.0016421	16.1206	63.2194	33.53	31.1024	6.75082	18.9359	5.52056	6.89462
1423	ENSECAG00000019571	24.3187	-1.59983	0.436423	-3.66579	0.000246575	0.00165572	14.8806	7.38928	16.3351	9.71951	30.3787	17.9891	51.8933	45.9641
1427	ENSECAG00000020522	35.0206	1.1416	0.311484	3.66504	0.0002473	0.00165931	58.2823	45.1567	32.6703	57.3451	21.9402	26.5102	19.874	18.3856
1428	ENSECAG00000022645	44.6366	1.02003	0.278435	3.66344	0.000248847	0.0016663	65.7226	66.5036	65.3406	41.7939	28.691	35.9782	23.1864	29.8767
1430	ENSECAG00000009026	4.96451	-3.69448	1.00948	-3.65977	0.000252444	0.00168807	1.24005	1.64206	0	0	8.43852	10.4147	9.93701	8.04372
1435	ENSECAG00000024404	53.0255	-1.24076	0.339416	-3.65557	0.000256615	0.00170864	29.7612	21.3468	46.4262	28.1866	61.6012	48.2865	109.307	79.2881
1436	ENSECAG00000027686	36.2267	-1.47734	0.404136	-3.65557	0.000256614	0.00170864	19.8408	27.9151	12.0364	16.5232	37.9733	42.6057	93.8495	39.0695
1437	ENSECAG00000029287	2.53866	-4.83772	1.32344	-3.6554	0.000256778	0.00170864	0	0	0	0	4.21926	4.73397	3.31234	8.04372
1438	ENSECAG00000012388	14.7707	1.96281	0.537138	3.65419	0.000257994	0.00171497	27.2811	29.5571	21.4936	15.5512	6.75082	3.78718	1.10411	12.6401
1439	ENSECAG00000015005	3.57812	4.51728	1.23622	3.6541	0.000258089	0.00171497	6.20024	9.85238	7.7377	3.88781	0	0.946794	0	0
1441	ENSECAG00000020053	12.5665	3.14851	0.862024	3.65246	0.000259735	0.00172352	59.5223	5.74722	16.3351	8.74756	3.37541	0	2.20822	4.59641
1443	ENSECAG00000016016	26.8555	1.20233	0.329312	3.65105	0.000261165	0.0017306	40.9216	46.7988	32.6703	29.1585	16.0332	13.2551	18.7699	17.2365
1444	ENSECAG00000007993	45.4409	-1.01968	0.279544	-3.64764	0.000264657	0.00175253	44.6418	22.1679	26.6521	28.1866	62.4451	69.116	56.3097	54.0078
1445	ENSECAG00000000279	25.4214	1.31642	0.360915	3.64745	0.000264853	0.00175261	33.4813	30.3782	38.6885	41.7939	8.43852	13.2551	14.3535	22.9821
1450	ENSECAG00000011663	11.5571	-1.81284	0.497644	-3.64284	0.000269643	0.00177815	7.44029	4.10516	2.57923	6.80366	15.1893	17.9891	17.6658	20.6838
1452	ENSECAG00000024473	10.5486	2.65841	0.729884	3.64224	0.000270281	0.00177991	4.96019	28.7361	18.9144	20.411	2.53156	6.62756	2.20822	0
1454	ENSECAG00000029214	2.50937	-4.82616	1.32617	-3.63917	0.000273521	0.00179877	0	0	0	0	3.37541	6.62756	6.62467	3.44731
1455	ENSECAG00000015566	17.6955	2.02578	0.556845	3.63796	0.000274801	0.00180594	49.6019	22.9889	22.3534	19.439	13.5016	5.68076	1.10411	6.89462
1456	ENSECAG00000007888	21.1132	2.08292	0.572717	3.63691	0.000275925	0.00181208	28.5211	55.0091	28.3716	25.2707	9.28237	17.9891	3.31234	1.1491
1459	ENSECAG00000005419	3.71873	-4.64499	1.2783	-3.63373	0.000279348	0.00183079	0	0.821032	0	0	6.75082	13.2551	6.62467	2.29821
1462	ENSECAG00000043812	2.77945	-4.95765	1.36758	-3.62514	0.000288803	0.00188888	0	0	0	0	3.37541	1.89359	6.62467	10.3419
1464	ENSECAG00000042715	3.30716	-4.4638	1.23459	-3.61561	0.000299637	0.00195705	0	0.821032	0	0	6.75082	7.57435	4.41645	6.89462
1466	ENSECAG00000013481	38.339	1.07655	0.298213	3.60999	0.000306204	0.00199722	34.7214	59.1143	55.0237	59.289	29.5348	27.457	23.1864	18.3856
1467	ENSECAG00000021345	58.4186	-1.25555	0.347973	-3.60818	0.000308349	0.00200984	53.3221	32.0202	22.3534	31.1024	45.568	95.6262	111.515	75.8408
1468	ENSECAG00000019260	41.8251	1.12396	0.31152	3.60798	0.00030859	0.00201004	68.2027	63.2194	56.7431	41.7939	32.9102	23.6698	33.1234	14.9383
1470	ENSECAG00000018323	6.28635	4.07265	1.12974	3.60494	0.000312226	0.00203096	3.72015	20.5258	6.01821	17.4951	2.53156	0	0	0
1471	ENSECAG00000024389	7.17134	-3.6572	1.01498	-3.60323	0.000314292	0.002043	4.96019	0	0	0	18.5647	4.73397	18.7699	10.3419
1472	ENSECAG00000012533	2.41469	-4.76464	1.3225	-3.60275	0.000314867	0.00204535	0	0	0	0	4.21926	3.78718	4.41645	6.89462
1473	ENSECAG00000007305	2.6038	-4.89671	1.35925	-3.60252	0.00031515	0.0020458	0	0	0	0	10.1262	2.84038	4.41645	3.44731
1475	ENSECAG00000030329	67.8897	1.64266	0.456229	3.60051	0.00031759	0.00205885	62.0024	36.9464	149.596	162.316	28.691	19.8827	33.1234	50.5605
1479	ENSECAG00000033034	6.27678	-2.89952	0.805747	-3.59854	0.000320004	0.00206888	3.72015	0.821032	0	1.9439	16.0332	8.52115	8.8329	10.3419
1480	ENSECAG00000015662	15.489	-1.72881	0.480491	-3.59801	0.000320656	0.0020717	13.6405	4.10516	5.15847	6.80366	22.784	32.191	24.2905	14.9383
1482	ENSECAG00000033556	15.0275	1.53901	0.428104	3.59495	0.000324454	0.00209341	28.5211	24.6309	17.1949	19.439	8.43852	8.52115	7.72879	5.74551
1483	ENSECAG00000012603	38.0578	-1.64236	0.457047	-3.59341	0.000326376	0.00210439	28.5211	5.74722	18.9144	21.3829	25.3156	71.9563	72.8714	59.7533
1485	ENSECAG00000024006	37.2017	-1.02866	0.286449	-3.59106	0.00032933	0.00212058	19.8408	29.5571	25.7923	22.3549	58.2258	52.0737	52.9974	36.7713
1487	ENSECAG00000008879	21.908	1.41973	0.395504	3.58968	0.000331089	0.00212945	39.6816	36.1254	21.4936	31.1024	17.7209	12.3083	9.93701	6.89462
1490	ENSECAG00000015809	130.039	2.64533	0.73721	3.5883	0.000332846	0.00213602	105.404	113.302	452.226	225.493	14.3455	13.2551	50.7892	65.4988
1491	ENSECAG00000023600	3.07266	-5.14047	1.43265	-3.58809	0.000333106	0.00213626	0	0	0	0	12.6578	8.52115	1.10411	2.29821
1492	ENSECAG00000021301	35.4752	-1.08939	0.303786	-3.58606	0.000335715	0.00215155	22.3209	15.5996	27.5118	25.2707	48.9434	36.925	47.4768	59.7533
1493	ENSECAG00000014847	6.45416	4.59339	1.28129	3.58498	0.000337104	0.00215756	32.2413	2.46309	5.15847	9.71951	0	0.946794	1.10411	0
1494	ENSECAG00000020788	15.3065	1.74278	0.48613	3.585	0.000337081	0.00215756	13.6405	22.9889	25.7923	32.0744	8.43852	10.4147	2.20822	6.89462
1497	ENSECAG00000014384	7.50511	3.19782	0.892697	3.5822	0.000340706	0.00217624	4.96019	20.5258	11.1767	17.4951	0	4.73397	0	1.1491
1498	ENSECAG00000016754	28.6848	-1.1963	0.334069	-3.58099	0.000342289	0.00218489	19.8408	16.4206	20.6339	12.6354	33.7541	29.3506	48.5809	48.2623
1499	ENSECAG00000011729	10.788	3.2675	0.912706	3.58001	0.000343583	0.00219169	2.4801	33.6623	6.87796	34.9902	0	3.78718	2.20822	2.29821
1500	ENSECAG00000018383	27.8091	-1.12311	0.31377	-3.57941	0.000344374	0.00219527	13.6405	19.7048	18.9144	17.4951	44.7242	42.6057	30.9151	34.4731
1501	ENSECAG00000000194	35.2734	1.09531	0.306195	3.57718	0.000347326	0.00221261	64.4825	33.6623	49.0054	45.6817	22.784	23.6698	18.7699	24.1312
1503	ENSECAG00000032438	72.9503	-1.13231	0.316651	-3.5759	0.000349026	0.00222049	54.5621	23.8099	59.3224	45.6817	118.139	63.4352	104.891	113.761
1504	ENSECAG00000006660	16.2276	1.56747	0.43837	3.57568	0.000349315	0.00222085	24.801	17.2417	29.2313	25.2707	5.06311	5.68076	11.0411	11.491
1506	ENSECAG00000020627	33.4703	-1.02513	0.286835	-3.57395	0.00035164	0.00223265	18.6007	24.6309	22.3534	22.3549	48.0996	49.2333	34.2275	48.2623
1507	ENSECAG00000009550	36.2526	1.41383	0.395723	3.57279	0.000353195	0.00224104	55.8022	52.546	42.9872	59.289	7.59467	29.3506	29.811	12.6401
1510	ENSECAG00000006756	2.66155	-4.89357	1.37106	-3.5692	0.000358073	0.00226748	0	0	0	0	1.6877	3.78718	6.62467	9.19282
1512	ENSECAG00000004262	37.1485	1.048	0.293709	3.56817	0.000359477	0.00227336	53.3221	34.4833	60.1821	52.4854	21.9402	27.457	23.1864	24.1312
1513	ENSECAG00000017456	4.7544	-4.25034	1.19126	-3.56795	0.000359787	0.00227382	0	0.821032	0	0.971951	11.8139	6.62756	14.3535	3.44731
1515	ENSECAG00000007177	35.6213	-1.06418	0.299016	-3.55893	0.000372362	0.00235018	21.0808	29.5571	18.0546	23.3268	53.1627	44.4993	58.518	36.7713
1520	ENSECAG00000032465	19.5457	2.25878	0.635777	3.5528	0.000381159	0.00239779	79.3631	10.6734	24.0728	15.5512	7.59467	5.68076	8.8329	4.59641
1521	ENSECAG00000004819	38.3427	1.66636	0.469381	3.55013	0.000385048	0.00242008	14.8806	91.9555	61.9016	64.1488	13.5016	26.5102	15.4576	18.3856
1524	ENSECAG00000011535	39.524	1.13702	0.320488	3.54778	0.000388499	0.00243755	59.5223	58.2932	49.0054	51.5134	40.5049	17.9891	20.9781	18.3856
1525	ENSECAG00000014815	14.8918	1.51276	0.426454	3.5473	0.000389208	0.0024404	27.2811	25.452	17.1949	18.4671	7.59467	8.52115	7.72879	6.89462
1526	ENSECAG00000012171	46.8448	1.12199	0.316344	3.54675	0.000390014	0.00244385	81.8432	48.4409	49.0054	77.7561	19.4086	39.7653	29.811	28.7276
1527	ENSECAG00000007991	3.36936	-4.47706	1.26271	-3.54559	0.00039174	0.00245306	0	0	0	0.971951	7.59467	4.73397	3.31234	10.3419
1528	ENSECAG00000009716	22.1859	2.24252	0.632849	3.54353	0.000394802	0.00247061	16.1206	49.2619	39.5482	41.7939	3.37541	21.7763	3.31234	2.29821
1529	ENSECAG00000014559	11.9924	1.93658	0.546589	3.54302	0.00039557	0.0024738	13.6405	13.9575	31.8105	16.5232	3.37541	7.57435	3.31234	5.74551
1530	ENSECAG00000024049	25.7719	1.28395	0.362523	3.54171	0.000397542	0.00248451	48.3619	25.452	42.9872	30.1305	18.5647	17.0423	12.1452	11.491
1531	ENSECAG00000032753	2.5177	-4.84583	1.36843	-3.54117	0.000398352	0.00248794	0	0	0	0	5.06311	9.46794	3.31234	2.29821
1534	ENSECAG00000007244	10.7083	1.8414	0.520416	3.53832	0.000402683	0.00251007	11.1604	23.8099	16.3351	15.5512	5.06311	4.73397	4.41645	4.59641
1536	ENSECAG00000009357	27.8924	-1.41389	0.399699	-3.53738	0.000404119	0.00251575	21.0808	13.1365	16.3351	10.6915	48.0996	18.9359	40.8522	54.0078
1538	ENSECAG00000016445	25.019	1.27644	0.360981	3.53603	0.000406183	0.00252366	33.4813	43.5147	37.8288	27.2146	20.2525	13.2551	16.5617	8.04372
1539	ENSECAG00000022900	3.36968	-4.4918	1.27028	-3.53606	0.000406142	0.00252366	0	0	0	0.971951	7.59467	9.46794	6.62467	2.29821
1540	ENSECAG00000018966	5.05368	-3.76395	1.06459	-3.5356	0.000406848	0.00252616	0	1.64206	0	0.971951	9.28237	15.1487	9.93701	3.44731
1542	ENSECAG00000019423	13.2096	1.88782	0.5343	3.53326	0.000410472	0.00254535	35.9614	12.3155	14.6157	20.411	3.37541	6.62756	6.62467	5.74551
1543	ENSECAG00000007211	11.4552	2.49366	0.707052	3.52684	0.000420551	0.00260616	4.96019	38.5885	13.7559	20.411	1.6877	6.62756	3.31234	2.29821
1544	ENSECAG00000022511	41.2728	1.21521	0.3447	3.5254	0.000422836	0.00261863	65.7226	37.7675	61.0419	66.0927	12.6578	35.0314	24.2905	27.5785
1545	ENSECAG00000020913	17.4352	-1.40918	0.399815	-3.52457	0.000424171	0.00262519	4.96019	10.6734	12.0364	9.71951	19.4086	27.457	26.4987	28.7276
1546	ENSECAG00000015498	43.577	1.02502	0.290872	3.52396	0.000425155	0.00262788	49.6019	61.5774	48.1457	74.8403	31.2225	36.925	19.874	26.4294
1547	ENSECAG00000033421	3.36193	-4.46675	1.26748	-3.52413	0.000424883	0.00262788	0	0	0.859745	0	2.53156	6.62756	8.8329	8.04372
1549	ENSECAG00000023644	47.0425	-1.06199	0.30175	-3.51943	0.000432468	0.00266963	16.1206	38.5885	37.8288	28.1866	63.2889	79.5307	51.8933	60.9024
1550	ENSECAG00000007238	11.5316	-1.70526	0.484807	-3.51739	0.000435809	0.00268852	3.72015	4.10516	6.01821	7.77561	19.4086	20.8295	15.4576	14.9383
1552	ENSECAG00000019777	39.119	-1.14983	0.327203	-3.51411	0.000441229	0.00271845	32.2413	15.5996	16.3351	34.0183	44.7242	60.5948	49.6851	59.7533
1554	ENSECAG00000024614	32.5479	1.06131	0.302269	3.51113	0.000446199	0.00274553	33.4813	43.5147	52.4444	46.6537	27.0033	18.9359	17.6658	20.6838
1555	ENSECAG00000024878	38.4614	-1.19412	0.340133	-3.51075	0.000446842	0.00274772	32.2413	13.9575	24.0728	24.2988	50.6311	71.9563	34.2275	56.306
1558	ENSECAG00000000303	17.6122	1.97275	0.562901	3.50462	0.000457263	0.00280638	54.5621	22.9889	16.3351	18.4671	5.06311	5.68076	14.3535	3.44731
1559	ENSECAG00000002390	8.21824	-2.44927	0.699148	-3.50322	0.000459662	0.0028193	1.24005	4.10516	0.859745	3.88781	23.6279	15.1487	8.8329	8.04372
1561	ENSECAG00000021039	76.6365	1.20373	0.344318	3.49597	0.000472343	0.00289337	90.5236	165.027	70.4991	102.055	75.1028	37.8718	37.5398	34.4731
1564	ENSECAG00000026875	21.2917	-1.79965	0.51558	-3.49054	0.000482042	0.00294712	18.6007	4.92619	7.7377	7.77561	59.0697	17.0423	27.6028	27.5785
1565	ENSECAG00000013128	2.446	4.73367	1.35634	3.49003	0.000482965	0.00294898	4.96019	4.92619	7.7377	1.9439	0	0	0	0
1566	ENSECAG00000015671	3.74715	-4.6247	1.32509	-3.49011	0.000482818	0.00294898	0	0.821032	0	0	1.6877	3.78718	11.0411	12.6401
1569	ENSECAG00000016326	16.8827	-1.45886	0.418796	-3.48347	0.000494965	0.00301648	9.92039	7.38928	10.3169	8.74756	36.2856	20.8295	23.1864	18.3856
1570	ENSECAG00000011788	9.27819	2.5717	0.738348	3.48304	0.000495754	0.00301937	6.20024	26.273	14.6157	16.5232	1.6877	6.62756	0	2.29821
1572	ENSECAG00000015336	19.9338	-1.26047	0.362258	-3.47948	0.000502383	0.00305584	9.92039	11.4944	12.8962	12.6354	36.2856	25.5634	25.3946	25.2803
1574	ENSECAG00000029514	22.8005	-1.35727	0.390165	-3.47871	0.000503835	0.00306078	11.1604	11.4944	12.8962	15.5512	21.0963	49.2333	26.4987	34.4731
1578	ENSECAG00000023930	26.058	1.06467	0.306479	3.47386	0.000513033	0.00310876	34.7214	34.4833	36.969	34.9902	17.7209	17.9891	14.3535	17.2365
1579	ENSECAG00000003882	12.148	1.60264	0.461395	3.47347	0.000513776	0.00311129	17.3607	15.5996	21.4936	18.4671	5.06311	5.68076	6.62467	6.89462
1582	ENSECAG00000013426	5.90509	3.42626	0.987583	3.46934	0.00052174	0.00315352	8.68034	4.10516	20.6339	9.71951	0	1.89359	2.20822	0
1585	ENSECAG00000008882	10.315	2.02419	0.58388	3.4668	0.000526703	0.00317349	14.8806	17.2417	17.1949	16.5232	4.21926	0	4.41645	8.04372
1586	ENSECAG00000020447	27.0115	1.2065	0.34801	3.46684	0.000526613	0.00317349	38.4415	41.8726	31.8105	38.8781	13.5016	25.5634	9.93701	16.0874
1587	ENSECAG00000024201	40.2341	-1.08531	0.31304	-3.46702	0.000526269	0.00317349	24.801	18.0627	26.6521	34.0183	51.475	76.6903	43.0604	47.1132
1594	ENSECAG00000009101	2.24447	4.60656	1.33217	3.45794	0.000544327	0.00326528	3.72015	4.10516	4.29872	5.83171	0	0	0	0
1595	ENSECAG00000010479	59.8539	1.31555	0.380561	3.45686	0.000546503	0.00327627	63.2425	149.428	52.4444	76.7842	45.568	41.6589	20.9781	28.7276
1597	ENSECAG00000014059	27.5202	1.69602	0.490772	3.45583	0.000548596	0.00328471	14.8806	80.4611	30.9508	41.7939	12.6578	17.9891	9.93701	11.491
1599	ENSECAG00000017895	88.721	1.02243	0.296007	3.45408	0.000552173	0.00330226	172.367	102.629	117.785	83.5878	74.259	37.8718	69.5591	51.7096
1601	ENSECAG00000000455	32.8041	-1.11001	0.321479	-3.45283	0.000554746	0.00331323	21.0808	11.4944	28.3716	22.3549	43.0365	47.3397	49.6851	39.0695
1602	ENSECAG00000002145	2.43027	4.69208	1.35921	3.45206	0.000556328	0.0033206	8.68034	2.46309	3.43898	4.85976	0	0	0	0
1604	ENSECAG00000010402	5.78495	3.36455	0.975402	3.4494	0.000561826	0.00334924	7.44029	3.28413	13.7559	17.4951	0	0.946794	2.20822	1.1491
1606	ENSECAG00000016660	15.0571	1.44234	0.418304	3.44806	0.000564627	0.00336321	18.6007	22.9889	22.3534	24.2988	8.43852	11.3615	5.52056	6.89462
1609	ENSECAG00000021047	21.2644	2.06785	0.600748	3.44213	0.000577146	0.00342987	60.7624	25.452	33.53	18.4671	20.2525	3.78718	4.41645	3.44731
1610	ENSECAG00000015678	21.4697	-1.55545	0.451942	-3.44171	0.000578049	0.00343311	6.20024	9.03135	9.45719	18.4671	18.5647	27.457	32.0193	50.5605
1611	ENSECAG00000015380	39.3957	-1.04377	0.303456	-3.43959	0.000582593	0.0034558	27.2811	19.7048	34.3898	21.3829	50.6311	38.8186	56.3097	66.6479
1616	ENSECAG00000015583	3.1408	-4.37062	1.27207	-3.43583	0.000590741	0.00349369	0	0	0	0.971951	3.37541	9.46794	4.41645	6.89462
1618	ENSECAG00000021500	59.7713	-1.17294	0.341452	-3.43515	0.000592232	0.00349995	29.7612	41.0516	50.7249	24.2988	46.4119	71.9563	107.099	106.867
1621	ENSECAG00000013791	24.4647	-1.1211	0.326644	-3.43216	0.000598791	0.00352999	14.8806	14.7786	13.7559	18.4671	35.4418	39.7653	27.6028	31.0258
1622	ENSECAG00000020200	102.098	2.69489	0.785156	3.43231	0.000598474	0.00352999	138.885	399.021	54.1639	115.662	23.6279	60.5948	11.0411	13.7892
1626	ENSECAG00000023886	13.3738	-1.62637	0.474624	-3.42665	0.000611072	0.00359353	3.72015	6.56825	7.7377	7.77561	14.3455	26.5102	25.3946	14.9383
1629	ENSECAG00000013115	23.1572	1.15106	0.336201	3.42374	0.000617648	0.00362505	33.4813	33.6623	24.9326	35.9622	15.1893	16.0955	12.1452	13.7892
1630	ENSECAG00000023824	16.5967	-1.48477	0.433686	-3.42361	0.00061795	0.00362505	7.44029	10.6734	4.29872	12.6354	31.2225	22.7231	25.3946	18.3856
1631	ENSECAG00000016277	2.38767	4.70802	1.3756	3.42252	0.000620438	0.00363742	2.4801	8.21032	2.57923	5.83171	0	0	0	0
1632	ENSECAG00000007847	11.7318	1.71662	0.501738	3.42135	0.000623108	0.00365083	12.4005	21.3468	22.3534	15.5512	4.21926	6.62756	3.31234	8.04372
1633	ENSECAG00000006801	17.7183	1.81542	0.531024	3.41872	0.000629169	0.00368409	48.3619	9.85238	30.9508	21.3829	8.43852	4.73397	8.8329	9.19282
1635	ENSECAG00000008993	41.9361	1.16636	0.341283	3.41756	0.000631853	0.00369438	44.6418	58.2932	62.7614	66.0927	33.7541	13.2551	18.7699	37.9204
1637	ENSECAG00000001074	5.77297	3.07931	0.901389	3.41618	0.000635055	0.0037072	12.4005	18.0627	5.15847	5.83171	1.6877	1.89359	0	1.1491
1638	ENSECAG00000007120	33.5074	1.11197	0.325495	3.41626	0.000634874	0.0037072	59.5223	37.7675	31.8105	54.4293	16.877	22.7231	25.3946	19.5347
1640	ENSECAG00000018134	3.15083	-4.37613	1.28186	-3.41388	0.00064045	0.00373496	1.24005	0	0	0	8.43852	7.57435	2.20822	5.74551
1641	ENSECAG00000027680	28.5088	-1.17369	0.343972	-3.41217	0.00064447	0.00375528	18.6007	15.5996	17.1949	18.4671	23.6279	37.8718	51.8933	44.815
1642	ENSECAG00000014994	4.78976	-3.59384	1.05465	-3.40762	0.000655311	0.00381613	1.24005	0	0.859745	0.971951	5.90697	4.73397	16.5617	8.04372
1645	ENSECAG00000031921	17.4447	2.05507	0.604236	3.4011	0.000671151	0.00390125	11.1604	36.1254	40.408	25.2707	15.1893	4.73397	5.52056	1.1491
1649	ENSECAG00000015087	48.6805	-1.01644	0.299407	-3.39486	0.000686638	0.00398158	28.5211	26.273	41.2677	32.0744	44.7242	55.8608	88.329	72.3935
1652	ENSECAG00000014570	27.5122	-1.1926	0.351787	-3.39011	0.000698657	0.00404392	18.6007	15.5996	17.1949	15.5512	30.3787	38.8186	26.4987	57.4551
1654	ENSECAG00000011192	24.9548	1.39716	0.412313	3.38858	0.000702543	0.0040615	21.0808	55.0091	30.9508	37.9061	18.5647	17.0423	11.0411	8.04372
1660	ENSECAG00000014829	38.2722	1.13193	0.334749	3.38144	0.000721074	0.00415356	42.1617	41.8726	68.7796	57.3451	32.0664	14.2019	19.874	29.8767
1661	ENSECAG00000012612	44.157	1.34856	0.399201	3.37815	0.000729748	0.00420099	33.4813	73.8928	82.5355	64.1488	31.2225	38.8186	17.6658	11.491
1662	ENSECAG00000013253	33.8068	1.07523	0.318454	3.37642	0.000734358	0.00422499	38.4415	36.9464	49.8652	58.3171	19.4086	29.3506	23.1864	14.9383
1665	ENSECAG00000023263	22.1137	-1.45509	0.431523	-3.37197	0.000746319	0.00428607	19.8408	10.6734	8.59745	8.74756	16.0332	39.7653	35.3316	37.9204
1666	ENSECAG00000032593	2.52676	-4.85943	1.44142	-3.37128	0.000748188	0.00429422	0	0	0	0	9.28237	7.57435	2.20822	1.1491
1667	ENSECAG00000009617	37.3367	1.19244	0.353764	3.37071	0.000749735	0.00430052	27.2811	55.0091	58.4626	66.0927	18.5647	18.9359	19.874	34.4731
1669	ENSECAG00000015461	3.98116	-3.97325	1.17951	-3.36857	0.000755596	0.00432894	0	0.821032	0	0.971951	5.06311	10.4147	8.8329	5.74551
1671	ENSECAG00000015871	15.6197	2.50244	0.743143	3.36737	0.000758884	0.00434258	6.20024	45.9778	18.0546	35.9622	0.843852	12.3083	3.31234	2.29821
1673	ENSECAG00000020900	21.9882	-1.3893	0.412693	-3.36643	0.000761467	0.00435215	16.1206	13.1365	11.1767	8.74756	39.6611	45.4461	22.0822	19.5347
1675	ENSECAG00000018901	14.566	-1.69601	0.50401	-3.36504	0.000765314	0.00436891	8.68034	7.38928	6.87796	4.85976	39.6611	14.2019	18.7699	16.0874
1677	ENSECAG00000020289	9.2438	1.96361	0.583656	3.36432	0.000767327	0.00437518	13.6405	10.6734	19.7741	14.5793	4.21926	0.946794	5.52056	4.59641
1678	ENSECAG00000020645	81.0814	2.95361	0.878016	3.36396	0.000768323	0.00437825	21.0808	289.824	102.31	161.344	10.1262	43.5525	6.62467	13.7892
1681	ENSECAG00000022527	6.62939	-2.61386	0.777658	-3.3612	0.000776047	0.00441437	1.24005	0.821032	4.29872	0.971951	15.1893	12.3083	4.41645	13.7892
1682	ENSECAG00000016815	29.1012	-1.09215	0.324973	-3.36073	0.000777364	0.00441924	16.1206	18.0627	21.4936	18.4671	32.9102	55.8608	33.1234	36.7713
1683	ENSECAG00000029421	10.0399	-2.31157	0.688488	-3.35746	0.00078662	0.0044692	1.24005	7.38928	3.43898	0.971951	19.4086	25.5634	16.5617	5.74551
1684	ENSECAG00000013722	99.5332	-1.08125	0.322186	-3.35599	0.000790808	0.00448766	89.2835	33.6623	73.0783	60.261	119.827	86.1583	178.866	155.129
1685	ENSECAG00000035885	19.3675	-1.33145	0.396731	-3.35605	0.000790652	0.00448766	14.8806	9.03135	13.7559	6.80366	32.0664	27.457	18.7699	32.1749
1687	ENSECAG00000008196	41.282	1.12741	0.336001	3.35538	0.000792568	0.00449231	64.4825	82.1032	38.6885	41.7939	33.7541	25.5634	23.1864	20.6838
1688	ENSECAG00000020071	21.274	1.18767	0.35413	3.35377	0.000797179	0.00451577	26.041	27.9151	30.0911	34.0183	13.5016	9.46794	17.6658	11.491
1689	ENSECAG00000026909	36.7048	1.14032	0.340044	3.35345	0.000798115	0.0045184	31.0012	58.2932	61.9016	50.5415	18.5647	35.0314	18.7699	19.5347
1694	ENSECAG00000008096	49.7605	1.37848	0.411689	3.34835	0.000812939	0.00458874	43.4017	105.092	57.6029	81.6439	24.4717	52.0737	16.5617	17.2365
1695	ENSECAG00000020621	23.7379	1.12868	0.337203	3.34718	0.000816392	0.00460551	35.9614	28.7361	39.5482	26.2427	16.0332	15.1487	12.1452	16.0874
1698	ENSECAG00000010287	27.7494	-1.13709	0.339949	-3.34488	0.00082319	0.00463566	12.4005	14.7786	22.3534	19.439	46.4119	26.5102	36.4357	43.6659
1700	ENSECAG00000017906	37.0509	3.46303	1.03672	3.34037	0.00083668	0.00470608	13.6405	136.291	48.1457	73.8683	4.21926	17.9891	1.10411	1.1491
1702	ENSECAG00000012744	4.79463	3.57786	1.07191	3.33784	0.000844333	0.00474355	3.72015	13.9575	6.01821	11.6634	0	1.89359	1.10411	0
1703	ENSECAG00000022426	27.1305	-1.2381	0.370951	-3.33764	0.000844922	0.00474406	16.1206	20.5258	14.6157	13.6073	55.6942	43.5525	26.4987	26.4294
1706	ENSECAG00000005243	8.88473	-2.00308	0.600432	-3.33606	0.000849743	0.00476274	4.96019	4.92619	2.57923	1.9439	21.9402	13.2551	8.8329	12.6401
1707	ENSECAG00000039353	6.09989	-2.73692	0.820566	-3.33541	0.000851745	0.00477117	0	3.28413	1.71949	0.971951	5.90697	18.9359	9.93701	8.04372
1709	ENSECAG00000032615	2.15153	-4.60037	1.38037	-3.33272	0.000860022	0.0048119	0	0	0	0	3.37541	4.73397	2.20822	6.89462
1710	ENSECAG00000020871	29.5937	-2.29098	0.687468	-3.3325	0.000860705	0.0048129	24.801	1.64206	7.7377	6.80366	17.7209	32.191	114.828	31.0258
1711	ENSECAG00000007234	35.8901	-1.10199	0.330762	-3.33168	0.000863239	0.00482425	11.1604	24.6309	30.9508	23.3268	49.7873	35.9782	60.7262	50.5605
1712	ENSECAG00000010461	10.4042	-2.07803	0.623836	-3.33105	0.000865197	0.00482673	8.68034	4.92619	0	2.91585	11.8139	18.9359	19.874	16.0874
1713	ENSECAG00000011498	37.15	3.44382	1.03378	3.3313	0.000864415	0.00482673	182.287	8.21032	51.5847	30.1305	9.28237	0.946794	4.41645	10.3419
1717	ENSECAG00000020689	41.9492	-1.27511	0.383181	-3.3277	0.000875657	0.00487655	9.92039	30.3782	18.0546	38.8781	54.0065	41.6589	79.4961	63.2006
1718	ENSECAG00000015842	2.92565	-4.28209	1.28774	-3.32528	0.000883298	0.00491624	0	0.821032	0	0	5.90697	7.57435	2.20822	6.89462
1719	ENSECAG00000012304	12.1167	-1.77479	0.533871	-3.32438	0.000886163	0.00492932	11.1604	4.10516	3.43898	3.88781	10.9701	22.7231	17.6658	22.9821
1723	ENSECAG00000024438	11.303	1.72319	0.519202	3.31892	0.000903665	0.005015	24.801	17.2417	12.0364	15.5512	5.06311	6.62756	2.20822	6.89462
1726	ENSECAG00000017288	26.5559	1.14389	0.344858	3.31699	0.000909943	0.00504107	42.1617	45.9778	32.6703	25.2707	15.1893	16.0955	13.2493	21.8329
1728	ENSECAG00000028673	2.02193	-4.51081	1.3613	-3.31361	0.000921004	0.00509644	0	0	0	0	3.37541	3.78718	4.41645	4.59641
1730	ENSECAG00000020143	13.6566	1.6385	0.494832	3.31123	0.00092887	0.00513402	14.8806	27.9151	22.3534	17.4951	5.06311	10.4147	8.8329	2.29821
1731	ENSECAG00000038338	51.3704	-1.19417	0.360818	-3.3096	0.000934277	0.00516092	9.92039	43.5147	36.969	33.0463	61.6012	57.7544	75.0796	93.0773
1732	ENSECAG00000016759	2.18006	-4.61641	1.39674	-3.30512	0.000949355	0.00524119	0	0	0	0	1.6877	5.68076	6.62467	3.44731
1733	ENSECAG00000015951	11.8324	-1.57532	0.476687	-3.30472	0.000950719	0.00524569	4.96019	4.92619	5.15847	8.74756	14.3455	22.7231	16.5617	17.2365
1734	ENSECAG00000014404	4.83025	3.55384	1.07571	3.30372	0.000954124	0.00526144	2.4801	9.85238	9.45719	13.6073	0	0.946794	0	2.29821
1735	ENSECAG00000038642	6.4301	-2.35878	0.714097	-3.30316	0.000956009	0.0052688	1.24005	4.10516	0.859745	1.9439	7.59467	13.2551	13.2493	9.19282
1736	ENSECAG00000019359	9.17627	1.76882	0.535725	3.30173	0.000960899	0.00529152	11.1604	14.7786	16.3351	14.5793	5.06311	4.73397	3.31234	3.44731
1737	ENSECAG00000032922	5.75117	2.81376	0.852234	3.30163	0.00096124	0.00529152	4.96019	18.0627	7.7377	9.71951	2.53156	1.89359	1.10411	0
1738	ENSECAG00000014375	4.30724	-3.41245	1.03383	-3.3008	0.000964108	0.00530426	2.4801	0.821032	0	0	6.75082	7.57435	9.93701	6.89462
1740	ENSECAG00000016382	51.9946	3.35063	1.01559	3.29921	0.000969568	0.00532817	12.4005	216.752	58.4626	91.3634	6.75082	24.6166	3.31234	2.29821
1743	ENSECAG00000023175	8.45881	-1.96128	0.594668	-3.2981	0.000973399	0.00534001	1.24005	3.28413	6.01821	2.91585	14.3455	16.0955	8.8329	14.9383
1744	ENSECAG00000018632	2.79999	-4.99924	1.51604	-3.29757	0.000975246	0.00534708	0	0	0	0	9.28237	8.52115	0	4.59641
1745	ENSECAG00000022614	12.0005	1.58991	0.482347	3.2962	0.000980039	0.00537028	24.801	13.9575	18.0546	15.5512	7.59467	4.73397	4.41645	6.89462
1746	ENSECAG00000019253	8.06548	-2.19031	0.664759	-3.2949	0.000984573	0.00539172	4.96019	1.64206	5.15847	0	10.1262	13.2551	12.1452	17.2365
1747	ENSECAG00000035811	2.58077	4.8104	1.46002	3.29475	0.00098508	0.00539172	2.4801	0.821032	8.59745	8.74756	0	0	0	0
1749	ENSECAG00000009657	27.1114	1.92087	0.583167	3.29385	0.00098824	0.00540154	86.8034	36.9464	29.2313	19.439	25.3156	5.68076	7.72879	5.74551
1750	ENSECAG00000022230	2.25409	-4.68829	1.42339	-3.29376	0.000988568	0.00540154	0	0	0	0	5.90697	7.57435	1.10411	3.44731
1752	ENSECAG00000009700	8.33653	-1.87247	0.568719	-3.29243	0.000993245	0.00542089	3.72015	4.10516	2.57923	3.88781	11.8139	12.3083	11.0411	17.2365
1756	ENSECAG00000021619	20.5541	1.39557	0.424364	3.28862	0.00100681	0.00548243	18.6007	25.452	43.847	31.1024	15.1893	7.57435	7.72879	14.9383
1757	ENSECAG00000021642	14.0242	-1.47456	0.448452	-3.28812	0.0010086	0.00548903	11.1604	8.21032	7.7377	2.91585	21.0963	22.7231	17.6658	20.6838
1758	ENSECAG00000020083	53.1014	-1.23257	0.375087	-3.28609	0.00101588	0.00552552	47.1219	11.4944	28.3716	40.822	51.475	82.3711	85.0166	78.139
1759	ENSECAG00000014489	4.4003	4.82167	1.4683	3.28386	0.00102396	0.00556632	0	18.8837	2.57923	12.6354	0	0	1.10411	0
1761	ENSECAG00000023676	8.37689	2.01322	0.613803	3.27991	0.0010384	0.00563836	16.1206	9.03135	13.7559	14.5793	2.53156	1.89359	2.20822	6.89462
1764	ENSECAG00000018290	50.6587	1.0876	0.331811	3.27776	0.00104634	0.00567183	64.4825	45.1567	95.4316	69.9805	29.5348	19.8827	47.4768	33.324
1765	ENSECAG00000012133	4.20505	3.94426	1.20364	3.27694	0.00104937	0.00568502	14.8806	4.92619	6.87796	4.85976	0	0.946794	0	1.1491
1766	ENSECAG00000010982	9.79407	1.81274	0.553697	3.27389	0.00106078	0.00574359	19.8408	9.03135	15.4754	16.5232	3.37541	2.84038	5.52056	5.74551
1768	ENSECAG00000006337	2.07413	-4.53925	1.38798	-3.27039	0.00107398	0.00580848	0	0	0	0	2.53156	2.84038	6.62467	4.59641
1769	ENSECAG00000015950	2.22391	-4.67225	1.42922	-3.2691	0.00107891	0.00583185	0	0	0	0	8.43852	3.78718	4.41645	1.1491
1771	ENSECAG00000008638	77.9683	-1.13471	0.347531	-3.26507	0.00109436	0.00590867	35.9614	29.5571	83.3952	45.6817	117.295	68.1692	139.118	104.568
1773	ENSECAG00000010384	16.9857	1.46166	0.447915	3.26327	0.00110136	0.00593979	29.7612	13.9575	32.6703	23.3268	7.59467	10.4147	5.52056	12.6401
1774	ENSECAG00000008109	3.32478	4.3799	1.34312	3.261	0.0011102	0.00597812	7.44029	0.821032	9.45719	7.77561	0	0	1.10411	0
1775	ENSECAG00000009543	11.0782	3.05785	0.937714	3.26096	0.00111035	0.00597812	23.5609	1.64206	24.0728	30.1305	5.90697	0	3.31234	0
1777	ENSECAG00000014498	8.65359	-1.83874	0.563985	-3.26026	0.00111309	0.00598951	2.4801	2.46309	5.15847	4.85976	13.5016	10.4147	16.5617	13.7892
1778	ENSECAG00000001495	31.999	1.04909	0.321957	3.25848	0.0011201	0.00602016	29.7612	48.4409	43.847	50.5415	20.2525	29.3506	16.5617	17.2365
1779	ENSECAG00000016281	24.9972	1.31796	0.404487	3.25834	0.00112067	0.00602016	44.6418	45.9778	30.0911	22.3549	11.8139	23.6698	9.93701	11.491
1782	ENSECAG00000005110	8.47919	1.97848	0.607419	3.25719	0.00112519	0.00603766	12.4005	8.21032	17.1949	16.5232	4.21926	4.73397	1.10411	3.44731
1783	ENSECAG00000022976	15.1355	1.52823	0.469281	3.25653	0.00112783	0.00604839	21.0808	25.452	27.5118	15.5512	4.21926	11.3615	4.41645	11.491
1784	ENSECAG00000041279	2.21171	4.58733	1.40889	3.25599	0.00112999	0.00605661	4.96019	8.21032	2.57923	1.9439	0	0	0	0
1785	ENSECAG00000021614	17.9222	1.52082	0.467211	3.25509	0.00113356	0.00607234	9.92039	32.0202	28.3716	35.9622	10.1262	12.3083	6.62467	8.04372
1786	ENSECAG00000000799	1.97698	-4.48758	1.37897	-3.2543	0.00113672	0.00608587	0	0	0	0	3.37541	5.68076	3.31234	3.44731
1787	ENSECAG00000024299	7.55887	-1.99496	0.613058	-3.2541	0.0011375	0.00608663	1.24005	3.28413	4.29872	2.91585	8.43852	13.2551	13.2493	13.7892
1789	ENSECAG00000014267	37.8843	1.02338	0.314894	3.24992	0.00115437	0.00616997	29.7612	46.7988	63.6211	62.2049	22.784	22.7231	27.6028	27.5785
1790	ENSECAG00000013816	26.7495	1.11086	0.341983	3.2483	0.00116097	0.00620178	23.5609	42.6936	43.847	35.9622	17.7209	20.8295	12.1452	17.2365
1791	ENSECAG00000018566	22.003	1.35357	0.416785	3.24765	0.00116363	0.0062125	45.8818	25.452	31.8105	24.2988	20.2525	11.3615	6.62467	10.3419
1792	ENSECAG00000005828	24.2701	-1.33565	0.411384	-3.24672	0.00116743	0.00622587	24.801	9.85238	13.7559	7.77561	34.5979	48.2865	29.811	25.2803
1793	ENSECAG00000016482	2.97363	4.97675	1.53284	3.24676	0.00116727	0.00622587	17.3607	0.821032	1.71949	3.88781	0	0	0	0
1796	ENSECAG00000009523	6.20659	-2.73122	0.842125	-3.24325	0.00118175	0.00629168	0	0	4.29872	1.9439	10.1262	7.57435	17.6658	8.04372
1797	ENSECAG00000024558	99.1801	2.60951	0.804877	3.24213	0.0011864	0.00631293	47.1219	311.992	140.138	182.727	27.0033	65.3288	9.93701	9.19282
1798	ENSECAG00000008500	2.77413	-4.18972	1.29235	-3.24193	0.00118723	0.00631386	0	0.821032	0	0	2.53156	7.57435	5.52056	5.74551
1801	ENSECAG00000022648	128.472	1.17017	0.361119	3.24041	0.00119357	0.006337	319.933	148.607	131.541	112.746	107.169	75.7435	87.2249	44.815
1803	ENSECAG00000019722	10.6384	1.64585	0.508109	3.23916	0.00119881	0.00635777	13.6405	17.2417	17.1949	16.5232	7.59467	2.84038	6.62467	3.44731
1806	ENSECAG00000028969	2.74247	-4.94669	1.53004	-3.23305	0.00122476	0.00648457	0	0	0	0	5.06311	0	8.8329	8.04372
1808	ENSECAG00000011496	16.8725	-1.32092	0.408778	-3.23139	0.00123188	0.00651507	13.6405	6.56825	10.3169	8.74756	32.0664	20.8295	20.9781	21.8329
1809	ENSECAG00000038949	4.42131	-3.04135	0.941276	-3.23109	0.0012332	0.00651843	1.24005	1.64206	0	0.971951	6.75082	5.68076	11.0411	8.04372
1810	ENSECAG00000009016	23.058	1.12565	0.348571	3.22931	0.00124087	0.00655538	29.7612	32.8413	37.8288	26.2427	17.7209	15.1487	8.8329	16.0874
1811	ENSECAG00000012842	6.88304	2.33097	0.72244	3.22652	0.00125305	0.0066124	7.44029	9.03135	14.6157	14.5793	0	3.78718	3.31234	2.29821
1816	ENSECAG00000021122	1646.54	1.09608	0.340222	3.22165	0.00127456	0.00671108	2635.1	3058.34	1629.22	1652.32	1016	1785.65	520.037	875.616
1823	ENSECAG00000007453	45.3198	1.08046	0.336152	3.2142	0.0013081	0.0068575	90.5236	33.6623	68.7796	53.4573	23.6279	28.4038	34.2275	29.8767
1824	ENSECAG00000012228	26.9259	1.13756	0.353914	3.21422	0.001308	0.0068575	43.4017	24.6309	44.7067	34.9902	11.8139	14.2019	20.9781	20.6838
1825	ENSECAG00000031036	5.52585	-2.9463	0.917622	-3.21079	0.00132369	0.00693539	3.72015	0.821032	0	0.971951	5.90697	4.73397	16.5617	11.491
1826	ENSECAG00000021165	8.51654	2.52104	0.785221	3.21061	0.00132452	0.00693597	2.4801	8.21032	18.9144	28.1866	1.6877	1.89359	3.31234	3.44731
1827	ENSECAG00000009141	23.762	1.08598	0.338276	3.21035	0.00132575	0.00693859	32.2413	27.094	34.3898	34.9902	10.9701	13.2551	18.7699	18.3856
1832	ENSECAG00000022532	12.9545	1.49055	0.464998	3.2055	0.00134829	0.0070373	26.041	14.7786	16.3351	19.439	7.59467	4.73397	5.52056	9.19282
1834	ENSECAG00000012690	2.67646	-4.14123	1.2928	-3.20331	0.00135857	0.00708326	0	0	0	0.971951	7.59467	3.78718	3.31234	5.74551
1836	ENSECAG00000013278	2.05847	-4.53101	1.41631	-3.19918	0.00137821	0.00717778	0	0	0	0	3.37541	2.84038	2.20822	8.04372
1838	ENSECAG00000036915	7.48344	-2.29981	0.719069	-3.19831	0.00138235	0.00719152	1.24005	5.74722	1.71949	0.971951	11.8139	5.68076	15.4576	17.2365
1839	ENSECAG00000015657	14.4106	-1.47605	0.461612	-3.19759	0.0013858	0.00720556	2.4801	6.56825	11.1767	9.71951	18.5647	27.457	22.0822	17.2365
1840	ENSECAG00000023807	19.1493	1.54814	0.484288	3.19672	0.00138998	0.00722334	21.0808	43.5147	13.7559	35.9622	11.8139	12.3083	4.41645	10.3419
1841	ENSECAG00000023113	20.2723	1.297	0.406406	3.19139	0.00141592	0.00735418	19.8408	45.1567	24.9326	25.2707	14.3455	12.3083	8.8329	11.491
1846	ENSECAG00000023069	2.84716	-4.22041	1.32479	-3.18571	0.00144398	0.00747962	0	0.821032	0	0	2.53156	3.78718	11.0411	4.59641
1847	ENSECAG00000004698	2.59671	-4.08954	1.28398	-3.18505	0.00144729	0.00748873	0	0	0	0.971951	5.06311	5.68076	3.31234	5.74551
1850	ENSECAG00000014393	18.0729	1.29565	0.406997	3.18344	0.00145537	0.00752228	16.1206	32.8413	23.2131	30.1305	7.59467	13.2551	9.93701	11.491
1851	ENSECAG00000011630	6.25692	3.22687	1.01377	3.18303	0.00145741	0.00752877	1.24005	15.5996	5.15847	23.3268	1.6877	1.89359	0	1.1491
1854	ENSECAG00000006686	44.4562	1.55908	0.490357	3.17949	0.00147537	0.00760921	17.3607	115.765	56.7431	75.8122	30.3787	30.2974	14.3535	14.9383
1856	ENSECAG00000009121	5.39135	2.61384	0.822288	3.17874	0.00147917	0.00761651	7.44029	15.5996	6.01821	7.77561	0.843852	0.946794	2.20822	2.29821
1857	ENSECAG00000029061	3.7016	-3.8741	1.21874	-3.17877	0.001479	0.00761651	0	1.64206	0	0	4.21926	5.68076	7.72879	10.3419
1858	ENSECAG00000022682	11.5694	1.56421	0.492141	3.17837	0.00148105	0.00762206	17.3607	19.7048	18.0546	13.6073	2.53156	6.62756	6.62467	8.04372
1860	ENSECAG00000015025	7.5106	-2.8191	0.888136	-3.17417	0.00150264	0.00772486	7.44029	0.821032	0	0	6.75082	17.9891	12.1452	14.9383
1862	ENSECAG00000021613	9.55079	2.21831	0.699109	3.17306	0.00150843	0.00774628	14.8806	25.452	9.45719	12.6354	0.843852	2.84038	1.10411	9.19282
1863	ENSECAG00000014711	5.07372	2.54139	0.801177	3.17207	0.00151356	0.00776507	6.20024	7.38928	10.3169	10.6915	1.6877	0.946794	2.20822	1.1491
1865	ENSECAG00000006694	12.0328	-1.54936	0.488484	-3.17176	0.00151518	0.00776845	7.44029	9.03135	6.01821	1.9439	17.7209	17.0423	20.9781	16.0874
1866	ENSECAG00000003872	28.3524	1.00474	0.316842	3.1711	0.00151862	0.00778193	34.7214	37.7675	44.7067	34.0183	22.784	12.3083	20.9781	19.5347
1867	ENSECAG00000036728	40.7626	-1.18598	0.374248	-3.16897	0.00152981	0.00783506	47.1219	18.8837	22.3534	12.6354	70.0397	48.2865	58.518	48.2623
1868	ENSECAG00000038834	29.0813	1.89324	0.597595	3.1681	0.0015344	0.00785433	14.8806	84.5663	34.3898	49.5695	9.28237	27.457	3.31234	9.19282
1870	ENSECAG00000011997	1.86542	-4.40055	1.3899	-3.16609	0.00154501	0.00790023	0	0	0	0	4.21926	2.84038	4.41645	3.44731
1873	ENSECAG00000021699	6.20731	-2.10878	0.667341	-3.15997	0.00157785	0.00805522	1.24005	2.46309	2.57923	2.91585	10.1262	12.3083	8.8329	9.19282
1874	ENSECAG00000027670	6.18385	-2.44804	0.775045	-3.15858	0.00158538	0.00808933	2.4801	3.28413	0.859745	0.971951	4.21926	9.46794	13.2493	14.9383
1875	ENSECAG00000018370	26.5599	1.46201	0.463284	3.15575	0.00160088	0.00816407	32.2413	50.904	34.3898	38.8781	14.3455	29.3506	6.62467	5.74551
1880	ENSECAG00000008394	2.7329	4.12437	1.30832	3.15241	0.00161928	0.00823591	3.72015	4.92619	9.45719	2.91585	0.843852	0	0	0
1881	ENSECAG00000009352	9.72504	1.83226	0.581395	3.15149	0.00162442	0.00825767	17.3607	9.03135	19.7741	14.5793	3.37541	5.68076	1.10411	6.89462
1883	ENSECAG00000015984	12.414	1.50529	0.478042	3.14886	0.00163907	0.00832331	16.1206	21.3468	24.0728	11.6634	6.75082	4.73397	7.72879	6.89462
1885	ENSECAG00000014530	40.2595	1.1842	0.376159	3.14815	0.00164308	0.00833482	52.082	73.8928	42.1275	56.3732	41.3488	22.7231	23.1864	10.3419
1886	ENSECAG00000019943	4.27408	-2.96912	0.943984	-3.14531	0.00165912	0.0084117	1.24005	0.821032	0	1.9439	6.75082	7.57435	5.52056	10.3419
1887	ENSECAG00000017343	21.7681	-1.97554	0.628221	-3.14465	0.00166285	0.00842425	11.1604	5.74722	6.87796	11.6634	5.06311	33.1378	71.7673	28.7276
1890	ENSECAG00000011276	5.30677	2.62413	0.835123	3.14221	0.00167676	0.00848318	7.44029	13.9575	11.1767	3.88781	1.6877	0.946794	2.20822	1.1491
1891	ENSECAG00000011574	9.67682	1.73152	0.551098	3.14194	0.00167831	0.00848653	13.6405	16.4206	12.8962	16.5232	3.37541	5.68076	7.72879	1.1491
1893	ENSECAG00000005228	52.523	1.08646	0.345986	3.14018	0.00168843	0.00852869	42.1617	77.177	87.6939	78.7281	31.2225	54.9141	27.6028	20.6838
1894	ENSECAG00000012801	12.5829	-1.52976	0.487194	-3.13993	0.00168986	0.00853141	6.20024	4.92619	6.87796	7.77561	15.1893	13.2551	16.5617	29.8767
1896	ENSECAG00000022641	26.7723	-1.25796	0.400678	-3.13959	0.00169184	0.00853238	21.0808	18.8837	14.6157	8.74756	21.9402	56.8076	35.3316	36.7713
1897	ENSECAG00000013897	6.61298	2.16851	0.690803	3.13911	0.00169461	0.00854184	7.44029	10.6734	13.7559	11.6634	3.37541	3.78718	2.20822	0
1899	ENSECAG00000011325	12.5147	-1.86077	0.593132	-3.13719	0.00170576	0.00859318	9.92039	2.46309	6.01821	3.88781	37.1295	11.3615	13.2493	16.0874
1900	ENSECAG00000007796	49.0959	-1.0138	0.323324	-3.13556	0.00171526	0.00863227	17.3607	38.5885	31.8105	41.7939	88.6045	62.4884	68.455	43.6659
1902	ENSECAG00000009020	4.03119	-3.31725	1.05885	-3.13287	0.00173103	0.00870249	1.24005	0	0.859745	0.971951	3.37541	6.62756	8.8329	10.3419
1903	ENSECAG00000010656	2.87288	-4.27213	1.36375	-3.13263	0.00173245	0.00870319	0	0.821032	0	0	10.1262	7.57435	3.31234	1.1491
1905	ENSECAG00000000624	21.6172	1.18489	0.378321	3.13197	0.00173635	0.00871546	28.5211	28.7361	24.9326	37.9061	16.877	6.62756	13.2493	16.0874
1907	ENSECAG00000036443	18.7286	1.16673	0.372906	3.12874	0.00175557	0.0088027	22.3209	25.452	29.2313	26.2427	7.59467	14.2019	12.1452	12.6401
1908	ENSECAG00000015456	14.2241	1.86299	0.595479	3.12855	0.0017567	0.00880376	7.44029	41.0516	16.3351	24.2988	6.75082	5.68076	9.93701	2.29821
1910	ENSECAG00000029315	28.1747	1.10754	0.354107	3.1277	0.0017618	0.00882005	54.5621	28.7361	31.8105	38.8781	10.9701	19.8827	19.874	20.6838
1911	ENSECAG00000014475	9.66825	2.19561	0.702048	3.12743	0.00176342	0.00882355	6.20024	24.6309	18.9144	13.6073	1.6877	5.68076	6.62467	0
1912	ENSECAG00000007013	11.4959	-1.67052	0.534338	-3.12635	0.00176993	0.00885149	2.4801	5.74722	10.3169	2.91585	14.3455	24.6166	15.4576	16.0874
1914	ENSECAG00000010859	21.5166	1.56474	0.500956	3.1235	0.00178711	0.00892809	9.92039	51.725	32.6703	34.0183	8.43852	16.0955	6.62467	12.6401
1917	ENSECAG00000027692	2740.64	-1.00899	0.324329	-3.111	0.00186453	0.0093003	1118.52	2183.94	1818.36	2155.79	1620.2	3440.65	4946.42	4641.23
1919	ENSECAG00000022901	11.0056	2.2601	0.726816	3.1096	0.00187343	0.00933493	3.72015	32.0202	19.7741	17.4951	5.90697	5.68076	0	3.44731
1920	ENSECAG00000008974	16.9955	1.31159	0.422089	3.10738	0.00188751	0.0093953	34.7214	27.094	19.7741	15.5512	10.9701	7.57435	9.93701	10.3419
1921	ENSECAG00000020506	12.6696	1.97065	0.634172	3.10743	0.00188722	0.0093953	8.68034	30.3782	19.7741	22.3549	9.28237	7.57435	3.31234	0
1922	ENSECAG00000021648	33.1568	1.00863	0.324655	3.10677	0.00189142	0.00940987	48.3619	46.7988	50.7249	31.1024	24.4717	13.2551	28.7069	21.8329
1923	ENSECAG00000019350	16.8666	-1.5594	0.502044	-3.1061	0.00189575	0.00942365	13.6405	4.10516	9.45719	7.77561	36.2856	33.1378	12.1452	18.3856
1926	ENSECAG00000010289	8.57155	-2.1622	0.696859	-3.10278	0.0019171	0.00951779	4.96019	0.821032	5.15847	1.9439	22.784	17.0423	5.52056	10.3419
1931	ENSECAG00000023894	3.41806	-3.7768	1.21853	-3.09947	0.00193869	0.00960009	0	0.821032	0.859745	0	10.9701	5.68076	4.41645	4.59641
1933	ENSECAG00000010012	11.9411	-1.52672	0.492752	-3.09836	0.00194595	0.00962606	7.44029	8.21032	6.01821	2.91585	15.1893	21.7763	12.1452	21.8329
1934	ENSECAG00000014116	11.5391	-1.48617	0.479696	-3.09816	0.00194728	0.00962767	2.4801	6.56825	6.01821	8.74756	14.3455	17.0423	19.874	17.2365
1936	ENSECAG00000013441	5.44134	-3.24126	1.04653	-3.09716	0.00195385	0.0096452	3.72015	0	0	0.971951	2.53156	17.0423	6.62467	12.6401
1937	ENSECAG00000020400	52.7477	1.41238	0.456007	3.09727	0.00195315	0.0096452	140.126	69.7877	46.4262	51.5134	55.6942	18.9359	17.6658	21.8329
1938	ENSECAG00000021078	4.05299	-2.92269	0.943799	-3.09673	0.0019567	0.00965427	1.24005	0.821032	1.71949	0	7.59467	7.57435	7.72879	5.74551
1939	ENSECAG00000024501	28.2512	1.03223	0.333354	3.09649	0.00195829	0.00965712	48.3619	27.9151	36.969	38.8781	20.2525	13.2551	24.2905	16.0874
1944	ENSECAG00000011246	3.38662	-3.71951	1.20203	-3.09437	0.00197234	0.00970141	0	0.821032	0	0.971951	5.06311	6.62756	4.41645	9.19282
1946	ENSECAG00000009471	25.5805	-1.10138	0.356404	-3.09027	0.00199972	0.00982596	18.6007	21.3468	17.1949	7.77561	34.5979	32.191	43.0604	29.8767
1948	ENSECAG00000024212	23.4132	1.06325	0.344474	3.0866	0.0020246	0.00993802	23.5609	32.8413	29.2313	40.822	13.5016	17.0423	17.6658	12.6401
1949	ENSECAG00000003236	17.3318	-1.20445	0.390282	-3.08612	0.0020279	0.0099491	7.44029	9.85238	13.7559	10.6915	31.2225	21.7763	22.0822	21.8329
1950	ENSECAG00000014836	32.9227	-1.05428	0.341791	-3.08458	0.00203843	0.0099956	31.0012	13.9575	16.3351	25.2707	32.0664	55.8608	46.3727	42.5168
1952	ENSECAG00000022300	8.87535	-2.04479	0.663093	-3.08372	0.0020443	0.0100142	0	4.10516	3.43898	5.83171	5.90697	18.9359	13.2493	19.5347
1953	ENSECAG00000018067	38.5228	1.40322	0.45545	3.08096	0.00206337	0.0101024	90.5236	26.273	66.2003	40.822	26.1594	7.57435	26.4987	24.1312
1954	ENSECAG00000010596	29.3976	1.04098	0.337907	3.08066	0.00206541	0.0101072	47.1219	48.4409	32.6703	30.1305	14.3455	26.5102	19.874	16.0874
1956	ENSECAG00000004286	8.07438	-1.8851	0.612272	-3.07886	0.00207792	0.010158	1.24005	4.92619	4.29872	2.91585	14.3455	12.3083	17.6658	6.89462
1957	ENSECAG00000020781	15.9709	-1.48907	0.483844	-3.07759	0.00208682	0.0101963	13.6405	5.74722	6.01821	8.74756	27.0033	10.4147	30.9151	25.2803
1958	ENSECAG00000022420	3.38279	-3.68335	1.19712	-3.07683	0.00209211	0.0102169	1.24005	0	0	0.971951	5.06311	8.52115	5.52056	5.74551
1960	ENSECAG00000009903	2.65768	-4.13352	1.34435	-3.07473	0.0021069	0.0102786	0	0	0	0.971951	4.21926	10.4147	2.20822	3.44731
1961	ENSECAG00000039494	19.065	-1.22864	0.39995	-3.072	0.00212633	0.0103682	8.68034	13.9575	15.4754	6.80366	18.5647	29.3506	29.811	29.8767
1962	ENSECAG00000022304	19.9014	-1.12498	0.366257	-3.07157	0.00212937	0.0103777	14.8806	11.4944	9.45719	14.5793	30.3787	19.8827	29.811	28.7276
1963	ENSECAG00000002611	42.1271	-1.1866	0.386391	-3.07097	0.00213363	0.0103932	47.1219	13.1365	21.4936	22.3549	48.0996	49.2333	85.0166	50.5605
1965	ENSECAG00000010244	7.67292	-2.1958	0.715255	-3.06995	0.00214094	0.0104182	6.20024	0.821032	2.57923	1.9439	8.43852	17.9891	17.6658	5.74551
1966	ENSECAG00000021700	1.97924	-4.50617	1.46912	-3.06725	0.0021604	0.0105075	0	0	0	0	6.75082	5.68076	1.10411	2.29821
1967	ENSECAG00000014306	11.2577	-1.78195	0.581136	-3.06632	0.00216711	0.0105348	11.1604	2.46309	1.71949	5.83171	12.6578	23.6698	18.7699	13.7892
1968	ENSECAG00000032667	3.9005	-3.96491	1.29312	-3.06616	0.00216827	0.010535	0	0.821032	0	0.971951	15.1893	8.52115	1.10411	4.59641
1969	ENSECAG00000021488	9.84415	1.81202	0.591024	3.06589	0.00217021	0.0105391	12.4005	8.21032	18.9144	21.3829	1.6877	3.78718	6.62467	5.74551
1970	ENSECAG00000015060	3.06733	5.07097	1.6545	3.06495	0.00217705	0.010567	1.24005	16.4206	6.87796	0	0	0	0	0
1973	ENSECAG00000015634	11.1315	1.84717	0.602864	3.06399	0.0021841	0.0105851	13.6405	19.7048	25.7923	10.6915	7.59467	4.73397	0	6.89462
1974	ENSECAG00000021518	6.3949	-2.27088	0.741309	-3.06333	0.00218886	0.0106028	4.96019	1.64206	2.57923	0	12.6578	12.3083	5.52056	11.491
1975	ENSECAG00000000599	30.2347	1.44399	0.471843	3.06031	0.00221105	0.0107048	37.2015	18.0627	74.7978	46.6537	20.2525	7.57435	14.3535	22.9821
1976	ENSECAG00000010243	5.30221	3.22785	1.05588	3.05702	0.00223548	0.0108176	1.24005	18.0627	5.15847	13.6073	0	0.946794	1.10411	2.29821
1977	ENSECAG00000017502	3.63566	-3.8001	1.24323	-3.05664	0.0022383	0.0108258	0	0	0	1.9439	8.43852	2.84038	5.52056	10.3419
1978	ENSECAG00000018567	9.16887	1.74999	0.572666	3.05586	0.00224414	0.0108485	18.6007	13.9575	15.4754	8.74756	4.21926	5.68076	5.52056	1.1491
1980	ENSECAG00000018209	19.0985	-1.28731	0.421376	-3.05502	0.00225046	0.0108681	4.96019	13.1365	10.3169	15.5512	37.9733	18.9359	23.1864	28.7276
1981	ENSECAG00000015806	57.6162	2.99557	0.981618	3.05166	0.00227579	0.0109849	18.6007	214.289	67.9198	108.859	4.21926	36.925	5.52056	4.59641
1985	ENSECAG00000021279	30.1392	1.05097	0.344582	3.04999	0.00228848	0.0110239	39.6816	45.1567	30.9508	47.6256	27.8471	22.7231	11.0411	16.0874
1986	ENSECAG00000006827	2.78009	-4.18434	1.37202	-3.04977	0.00229016	0.0110265	1.24005	0	0	0	9.28237	2.84038	7.72879	1.1491
1988	ENSECAG00000009111	8.18272	2.02089	0.662763	3.04918	0.00229465	0.0110369	11.1604	22.1679	10.3169	8.74756	1.6877	5.68076	1.10411	4.59641
1989	ENSECAG00000018725	30.5882	1.21596	0.398815	3.04894	0.00229648	0.0110402	63.2425	19.7048	50.7249	37.9061	22.784	14.2019	15.4576	20.6838
1990	ENSECAG00000016677	12.2473	1.44884	0.475567	3.04655	0.00231486	0.0111229	17.3607	13.9575	19.7741	20.411	3.37541	8.52115	8.8329	5.74551
1991	ENSECAG00000010840	2.36726	-3.94587	1.29601	-3.04463	0.00232965	0.0111876	0	0	0	0.971951	4.21926	4.73397	4.41645	4.59641
1992	ENSECAG00000017952	13.996	1.60504	0.527193	3.0445	0.00233066	0.0111876	16.1206	13.1365	29.2313	25.2707	3.37541	6.62756	4.41645	13.7892
1994	ENSECAG00000015276	52.1362	1.282	0.421283	3.0431	0.00234157	0.0112287	152.526	45.9778	47.286	50.5415	31.2225	34.0846	20.9781	34.4731
1995	ENSECAG00000021865	14.6451	1.44761	0.47583	3.04229	0.00234788	0.0112533	17.3607	33.6623	17.1949	17.4951	8.43852	8.52115	11.0411	3.44731
1996	ENSECAG00000025005	27.9743	-1.3763	0.452514	-3.04145	0.00235439	0.0112789	33.4813	6.56825	14.6157	8.74756	32.0664	35.9782	46.3727	45.9641
1997	ENSECAG00000021545	2.64818	-4.11306	1.35242	-3.04126	0.00235591	0.0112805	0	0	0	0.971951	1.6877	9.46794	3.31234	5.74551
1999	ENSECAG00000012342	14.6841	-1.42197	0.467931	-3.03884	0.00237493	0.0113602	4.96019	6.56825	9.45719	10.6915	21.0963	18.9359	33.1234	12.6401
2000	ENSECAG00000026829	41.9706	1.09447	0.360416	3.03667	0.00239204	0.0114363	93.0037	44.3357	33.53	58.3171	19.4086	33.1378	27.6028	26.4294
2004	ENSECAG00000006338	14.1984	1.4161	0.466775	3.0338	0.00241492	0.0115227	19.8408	12.3155	30.9508	19.439	8.43852	5.68076	7.72879	9.19282
2005	ENSECAG00000043225	1.81776	-4.34812	1.43409	-3.03197	0.00242966	0.0115872	0	0	0	0	2.53156	1.89359	5.52056	4.59641
2006	ENSECAG00000006659	12.1801	-1.40394	0.463155	-3.03125	0.0024354	0.0116088	8.68034	8.21032	5.15847	4.85976	18.5647	16.0955	22.0822	13.7892
2007	ENSECAG00000000755	37.7224	1.11099	0.366595	3.03058	0.00244088	0.0116291	23.5609	60.7563	68.7796	52.4854	26.1594	17.9891	19.874	32.1749
2008	ENSECAG00000014452	2.58047	4.0394	1.33312	3.03003	0.0024453	0.0116444	1.24005	5.74722	6.87796	5.83171	0	0.946794	0	0
2010	ENSECAG00000009602	9.75623	-1.67856	0.554157	-3.02903	0.00245337	0.0116703	3.72015	8.21032	3.43898	2.91585	15.1893	13.2551	20.9781	10.3419
2011	ENSECAG00000024568	3.80062	-3.23041	1.06653	-3.02891	0.0024544	0.0116703	1.24005	0	0	1.9439	9.28237	6.62756	4.41645	6.89462
2012	ENSECAG00000014774	10.9167	1.87591	0.619976	3.02577	0.00247998	0.0117861	16.1206	33.6623	12.0364	6.80366	4.21926	6.62756	4.41645	3.44731
2013	ENSECAG00000009515	5.29159	-2.20944	0.730352	-3.02517	0.00248494	0.0118038	1.24005	1.64206	2.57923	1.9439	9.28237	7.57435	7.72879	10.3419
2016	ENSECAG00000012166	332.09	1.19084	0.393973	3.02264	0.00250584	0.0118794	446.418	226.605	801.282	372.257	124.046	118.349	279.34	288.425
2017	ENSECAG00000018814	6.20259	-2.9707	0.982801	-3.02269	0.00250536	0.0118794	0	0	3.43898	1.9439	4.21926	3.78718	13.2493	22.9821
2020	ENSECAG00000013814	17.6958	1.34214	0.444366	3.02034	0.00252494	0.0119522	28.5211	20.5258	25.7923	27.2146	11.8139	15.1487	2.20822	10.3419
2021	ENSECAG00000000176	18.4355	-1.12179	0.371536	-3.01932	0.00253339	0.0119863	9.92039	12.3155	9.45719	14.5793	21.0963	29.3506	23.1864	27.5785
2022	ENSECAG00000039185	33.9768	-1.47228	0.487809	-3.01815	0.0025432	0.0120268	42.1617	4.92619	13.7559	12.6354	48.9434	53.9673	55.2056	40.2186
2023	ENSECAG00000009576	4.72211	3.10089	1.02852	3.01491	0.00257052	0.01215	2.4801	6.56825	11.1767	13.6073	0	2.84038	1.10411	0
2025	ENSECAG00000019780	67.1966	1.71749	0.569847	3.01394	0.00257877	0.0121769	16.1206	207.721	69.6393	118.578	21.0963	55.8608	20.9781	27.5785
2026	ENSECAG00000038154	11.2715	1.4502	0.481448	3.01215	0.00259401	0.0122428	14.8806	15.5996	20.6339	14.5793	4.21926	5.68076	8.8329	5.74551
2027	ENSECAG00000016610	19.8967	-1.14662	0.380734	-3.0116	0.00259873	0.012259	9.92039	13.1365	14.6157	11.6634	37.9733	18.9359	26.4987	26.4294
2028	ENSECAG00000010053	11.5236	2.41558	0.802273	3.01092	0.00260461	0.0122807	4.96019	29.5571	18.9144	24.2988	0.843852	11.3615	1.10411	1.1491
2029	ENSECAG00000021983	1.73303	-4.29575	1.42684	-3.01068	0.00260666	0.0122843	0	0	0	0	4.21926	2.84038	2.20822	4.59641
2030	ENSECAG00000028731	2.39749	3.90587	1.2978	3.00962	0.00261577	0.0123212	4.96019	4.10516	3.43898	5.83171	0.843852	0	0	0
2031	ENSECAG00000006880	1.81885	-4.37234	1.45301	-3.00916	0.00261967	0.012329	0	0	0	0	5.06311	3.78718	1.10411	4.59641
2032	ENSECAG00000016713	2.04049	-4.55426	1.51348	-3.00913	0.00262	0.012329	0	0	0	0	10.1262	2.84038	2.20822	1.1491
2035	ENSECAG00000016522	8.74341	-2.05822	0.684858	-3.00532	0.00265302	0.0124659	4.96019	4.10516	0	4.85976	24.4717	11.3615	12.1452	8.04372
2036	ENSECAG00000014312	2.61483	-4.10591	1.36722	-3.00311	0.00267234	0.0125505	0	0.821032	0	0	3.37541	7.57435	1.10411	8.04372
2037	ENSECAG00000005195	24.0522	1.06571	0.355013	3.00189	0.00268308	0.0125886	22.3209	35.3044	29.2313	42.7659	14.3455	12.3083	15.4576	20.6838
2038	ENSECAG00000012871	4.76631	-2.50934	0.83589	-3.00199	0.00268217	0.0125886	2.4801	2.46309	0.859745	0	8.43852	10.4147	7.72879	5.74551
2039	ENSECAG00000009545	3.25439	3.60683	1.2018	3.00119	0.00268926	0.0126104	4.96019	7.38928	6.87796	4.85976	0.843852	0	1.10411	0
2042	ENSECAG00000010777	11.7974	-1.65611	0.552036	-3	0.00269976	0.0126421	6.20024	4.92619	5.15847	6.80366	32.9102	17.0423	12.1452	9.19282
2043	ENSECAG00000016076	33.0464	-1.13364	0.377945	-2.99947	0.00270448	0.012658	32.2413	24.6309	12.0364	14.5793	56.5381	27.457	47.4768	49.4114
2045	ENSECAG00000018813	5.17164	-2.37427	0.792125	-2.99735	0.00272341	0.0127341	2.4801	1.64206	0.859745	1.9439	14.3455	6.62756	7.72879	5.74551
2046	ENSECAG00000008873	9.32163	-1.77373	0.592082	-2.99576	0.00273764	0.0127944	2.4801	2.46309	7.7377	3.88781	9.28237	15.1487	22.0822	11.491
2049	ENSECAG00000011967	18.1453	-1.11684	0.373426	-2.99078	0.00278263	0.0129856	12.4005	11.4944	12.0364	9.71951	18.5647	24.6166	27.6028	28.7276
2050	ENSECAG00000004249	2.34295	-3.91954	1.311	-2.98973	0.00279229	0.0130243	1.24005	0	0	0	5.06311	5.68076	3.31234	3.44731
2051	ENSECAG00000014500	1.80643	-4.36538	1.46075	-2.98845	0.00280398	0.0130725	0	0	0	0	4.21926	5.68076	1.10411	3.44731
2054	ENSECAG00000011958	7.60769	-1.8496	0.61933	-2.98645	0.00282234	0.0131389	3.72015	4.10516	3.43898	1.9439	8.43852	18.9359	9.93701	10.3419
2055	ENSECAG00000016985	1.79693	-4.33645	1.45434	-2.98172	0.0028663	0.013337	0	0	0	0	1.6877	4.73397	2.20822	5.74551
2056	ENSECAG00000031994	8.62828	-1.97626	0.663072	-2.98045	0.00287823	0.013386	7.44029	2.46309	2.57923	1.9439	9.28237	12.3083	7.72879	25.2803
2057	ENSECAG00000028239	7.84447	-2.41493	0.810393	-2.97994	0.00288303	0.0134018	0	4.10516	3.43898	1.9439	6.75082	23.6698	3.31234	19.5347
2058	ENSECAG00000022473	2.36448	-3.95084	1.32592	-2.97969	0.00288536	0.0134061	0	0	0.859745	0	4.21926	4.73397	2.20822	6.89462
2061	ENSECAG00000019246	10.1904	-1.87655	0.630074	-2.9783	0.00289855	0.0134357	2.4801	3.28413	9.45719	1.9439	24.4717	8.52115	19.874	11.491
2062	ENSECAG00000023813	14.6353	1.32469	0.444784	2.97828	0.00289871	0.0134357	19.8408	30.3782	18.9144	14.5793	10.9701	6.62756	7.72879	8.04372
2063	ENSECAG00000031303	3.08557	-4.32973	1.45377	-2.97828	0.00289875	0.0134357	0	0	0	0.971951	2.53156	2.84038	1.10411	17.2365
2064	ENSECAG00000016153	13.9992	-1.31918	0.443046	-2.97753	0.00290579	0.0134618	6.20024	7.38928	6.87796	11.6634	26.1594	18.9359	20.9781	13.7892
2065	ENSECAG00000008186	3.77041	3.16206	1.06264	2.97565	0.00292364	0.0135248	3.72015	4.92619	8.59745	9.71951	0	0.946794	1.10411	1.1491
2066	ENSECAG00000011466	27.2107	1.04086	0.349787	2.9757	0.00292324	0.0135248	53.3221	27.9151	31.8105	34.0183	14.3455	23.6698	17.6658	14.9383
2069	ENSECAG00000012454	26.593	1.06714	0.358863	2.97369	0.00294246	0.0135987	18.6007	45.9778	42.1275	36.9342	17.7209	19.8827	16.5617	14.9383
2070	ENSECAG00000022765	22.6394	-1.13745	0.383119	-2.96892	0.00298845	0.0138046	18.6007	9.03135	10.3169	19.439	28.691	37.8718	35.3316	21.8329
2073	ENSECAG00000020568	33.1271	1.07191	0.361586	2.96448	0.00303197	0.0139854	42.1617	38.5885	54.1639	44.7098	15.1893	35.0314	11.0411	24.1312
2076	ENSECAG00000001399	8.08242	1.85908	0.627316	2.96355	0.00304112	0.0140073	4.96019	13.1365	12.8962	19.439	2.53156	3.78718	3.31234	4.59641
2077	ENSECAG00000013188	24.6376	1.70368	0.575184	2.96197	0.00305675	0.0140725	11.1604	69.7877	30.0911	39.85	10.1262	23.6698	5.52056	6.89462
2078	ENSECAG00000017620	6.63301	-2.14596	0.725003	-2.95994	0.00307699	0.0141589	2.4801	0	2.57923	4.85976	6.75082	10.4147	11.0411	14.9383
2080	ENSECAG00000004534	13.8011	1.78327	0.603389	2.95543	0.00312235	0.0143469	8.68034	21.3468	14.6157	40.822	3.37541	11.3615	3.31234	6.89462
2081	ENSECAG00000022301	11.9308	1.42432	0.481925	2.95548	0.00312187	0.0143469	18.6007	23.8099	16.3351	10.6915	5.90697	6.62756	7.72879	5.74551
2082	ENSECAG00000023564	7.54074	-1.7913	0.606157	-2.95518	0.00312489	0.0143517	3.72015	2.46309	2.57923	4.85976	8.43852	11.3615	16.5617	10.3419
2085	ENSECAG00000022606	1.68391	4.1839	1.41776	2.95107	0.00316672	0.01452	3.72015	3.28413	2.57923	3.88781	0	0	0	0
2087	ENSECAG00000015596	6.264	-2.05278	0.695668	-2.9508	0.00316952	0.0145218	4.96019	1.64206	2.57923	0.971951	13.5016	8.52115	11.0411	6.89462
2089	ENSECAG00000000393	18.3631	1.3282	0.450406	2.9489	0.00318909	0.0145974	23.5609	23.8099	30.9508	26.2427	3.37541	15.1487	7.72879	16.0874
2092	ENSECAG00000021292	8.10673	3.332	1.1304	2.94762	0.00320234	0.0146371	45.8818	5.74722	1.71949	5.83171	3.37541	0	0	2.29821
2093	ENSECAG00000014590	13.936	1.46537	0.497287	2.94674	0.00321143	0.0146716	11.1604	23.8099	26.6521	19.439	4.21926	4.73397	8.8329	12.6401
2095	ENSECAG00000018727	17.2981	-1.45192	0.493053	-2.94476	0.00323209	0.0147519	19.8408	9.03135	3.43898	5.83171	30.3787	29.3506	20.9781	19.5347
2096	ENSECAG00000002570	1.65446	-4.21893	1.43312	-2.94388	0.00324122	0.0147865	0	0	0	0	2.53156	2.84038	4.41645	3.44731
2097	ENSECAG00000012497	7.24862	-1.84879	0.628053	-2.94369	0.00324321	0.0147885	3.72015	1.64206	2.57923	4.85976	11.8139	7.57435	15.4576	10.3419
2100	ENSECAG00000010095	12.0286	-1.35808	0.46196	-2.93982	0.00328401	0.0149443	3.72015	9.03135	6.87796	6.80366	13.5016	17.9891	18.7699	19.5347
2103	ENSECAG00000012553	8.1391	-1.80117	0.612775	-2.93937	0.00328878	0.0149535	1.24005	6.56825	3.43898	2.91585	18.5647	13.2551	9.93701	9.19282
2108	ENSECAG00000016134	12.9464	-1.38332	0.471318	-2.935	0.00333553	0.0151168	6.20024	10.6734	7.7377	3.88781	21.0963	23.6698	17.6658	12.6401
2109	ENSECAG00000016570	1.66959	-4.256	1.4501	-2.93497	0.00333576	0.0151168	0	0	0	0	5.06311	3.78718	2.20822	2.29821
2110	ENSECAG00000036217	2.73573	4.11475	1.4019	2.93513	0.00333407	0.0151168	4.96019	12.3155	1.71949	1.9439	0	0.946794	0	0
2111	ENSECAG00000008187	7.79573	2.26778	0.77296	2.93389	0.00334746	0.0151627	3.72015	24.6309	7.7377	15.5512	1.6877	5.68076	2.20822	1.1491
2113	ENSECAG00000017765	27.1922	-1.28433	0.437884	-2.93305	0.00335652	0.0151893	19.8408	22.9889	11.1767	9.71951	66.6643	34.0846	23.1864	29.8767
2114	ENSECAG00000017978	10.3106	-1.53637	0.523944	-2.93231	0.00336451	0.0152183	6.20024	6.56825	1.71949	6.80366	16.0332	11.3615	16.5617	17.2365
2115	ENSECAG00000005958	9.39578	-1.56393	0.533698	-2.93036	0.00338571	0.0153069	4.96019	3.28413	6.01821	4.85976	16.877	12.3083	17.6658	9.19282
2116	ENSECAG00000019705	34.8491	4.05892	1.38522	2.93017	0.00338779	0.0153091	11.1604	135.47	46.4262	69.9805	0	12.3083	0	3.44731
2117	ENSECAG00000022412	17.4285	1.18427	0.404317	2.92907	0.00339974	0.0153558	26.041	22.1679	19.7741	29.1585	10.1262	15.1487	5.52056	11.491
2118	ENSECAG00000008087	2.38621	-3.96301	1.35421	-2.92643	0.00342879	0.0154797	0	0	0.859745	0	1.6877	7.57435	5.52056	3.44731
2120	ENSECAG00000020248	3.22416	-3.66033	1.25196	-2.92368	0.00345917	0.0156022	0	0	1.71949	0	4.21926	7.57435	8.8329	3.44731
2121	ENSECAG00000018207	7.36788	-1.75845	0.601739	-2.92229	0.00347471	0.0156649	4.96019	3.28413	2.57923	2.91585	10.9701	15.1487	11.0411	8.04372
2123	ENSECAG00000017305	2.20235	-3.85045	1.31839	-2.92058	0.00349385	0.0157363	0	0	0.859745	0	5.06311	3.78718	3.31234	4.59641
2124	ENSECAG00000008823	4.00007	2.83344	0.970322	2.92011	0.00349911	0.0157526	3.72015	9.85238	8.59745	5.83171	0.843852	0.946794	2.20822	0
2126	ENSECAG00000022089	9.57785	-1.70732	0.584877	-2.91911	0.00351038	0.0157884	6.20024	5.74722	4.29872	1.9439	24.4717	10.4147	14.3535	9.19282
2127	ENSECAG00000009174	17.1517	1.18924	0.407517	2.91826	0.00351996	0.0158241	27.2811	24.6309	18.9144	25.2707	16.0332	10.4147	6.62467	8.04372
2128	ENSECAG00000022659	2.34804	-3.93794	1.35105	-2.91472	0.00356013	0.0159972	0	0	0	0.971951	2.53156	8.52115	3.31234	3.44731
2130	ENSECAG00000010052	1.7419	-4.30265	1.47728	-2.91254	0.00358497	0.0160936	0	0	0	0	2.53156	4.73397	5.52056	1.1491
2131	ENSECAG00000020201	15.2402	-1.35627	0.465892	-2.91113	0.00360128	0.0161593	2.4801	8.21032	11.1767	11.6634	17.7209	20.8295	17.6658	32.1749
2133	ENSECAG00000010436	2.28371	-3.91223	1.34489	-2.90895	0.00362642	0.0162569	0	0	0.859745	0	6.75082	2.84038	5.52056	2.29821
2135	ENSECAG00000000121	3.24923	3.56981	1.22784	2.90739	0.00364464	0.0163232	2.4801	5.74722	7.7377	7.77561	0	0	1.10411	1.1491
2136	ENSECAG00000015944	19.7365	-1.31288	0.451726	-2.90637	0.00365646	0.0163685	12.4005	4.92619	16.3351	11.6634	25.3156	15.1487	35.3316	36.7713
2138	ENSECAG00000032431	17.5854	1.19812	0.412874	2.9019	0.00370905	0.0165884	17.3607	27.9151	26.6521	26.2427	16.0332	9.46794	5.52056	11.491
2140	ENSECAG00000014613	35.3927	1.23019	0.424087	2.90079	0.00372217	0.0166315	22.3209	82.9242	39.5482	53.4573	18.5647	31.2442	13.2493	21.8329
2141	ENSECAG00000011227	1.67639	-4.25912	1.4686	-2.90013	0.00373013	0.0166593	0	0	0	0	5.90697	1.89359	3.31234	2.29821
2142	ENSECAG00000012384	22.5686	1.0587	0.365089	2.89984	0.00373356	0.0166668	19.8408	32.0202	35.2495	34.0183	10.9701	12.3083	15.4576	20.6838
2143	ENSECAG00000012722	1.59664	-4.18145	1.44251	-2.89872	0.00374684	0.0167105	0	0	0	0	3.37541	3.78718	3.31234	2.29821
2145	ENSECAG00000021048	2.38523	3.86277	1.33303	2.89774	0.00375863	0.0167553	7.44029	2.46309	5.15847	2.91585	0	0	1.10411	0
2148	ENSECAG00000018633	290.05	1.03145	0.356728	2.89142	0.00383508	0.0170722	708.068	169.133	396.342	285.754	235.435	185.572	170.033	170.067
2149	ENSECAG00000002887	9.43782	-1.99958	0.692294	-2.88833	0.00387291	0.0172165	0	6.56825	6.01821	1.9439	10.1262	28.4038	13.2493	9.19282
2150	ENSECAG00000023573	16.9002	1.19569	0.413957	2.88843	0.00387174	0.0172165	26.041	14.7786	30.9508	22.3549	10.9701	7.57435	11.0411	11.491
2154	ENSECAG00000019549	21.1249	-1.05874	0.366653	-2.88759	0.00388203	0.0172331	8.68034	18.8837	12.0364	14.5793	24.4717	35.0314	24.2905	31.0258
2155	ENSECAG00000000550	5.8589	2.03714	0.70562	2.88702	0.00388915	0.0172366	7.44029	9.85238	10.3169	9.71951	0.843852	1.89359	2.20822	4.59641
2156	ENSECAG00000017989	21.8179	1.05978	0.367037	2.88738	0.00388464	0.0172366	32.2413	28.7361	27.5118	30.1305	21.9402	11.3615	8.8329	13.7892
2158	ENSECAG00000032603	1.61513	-4.19379	1.45259	-2.88712	0.00388784	0.0172366	0	0	0	0	2.53156	4.73397	2.20822	3.44731
2159	ENSECAG00000014504	3.45735	-3.1176	1.08009	-2.88643	0.00389639	0.0172567	1.24005	0.821032	0.859745	0	5.06311	9.46794	3.31234	6.89462
2160	ENSECAG00000014505	19.7986	1.38164	0.478778	2.88577	0.00390455	0.0172849	53.3221	16.4206	28.3716	16.5232	8.43852	9.46794	14.3535	11.491
2162	ENSECAG00000017388	4.41667	3.04717	1.05684	2.88329	0.00393541	0.0174054	2.4801	15.5996	7.7377	5.83171	0.843852	2.84038	0	0
2165	ENSECAG00000007797	14.4896	1.37026	0.475932	2.87911	0.003988	0.0176135	23.5609	23.8099	18.0546	18.4671	13.5016	2.84038	9.93701	5.74551
2172	ENSECAG00000023361	4.4488	-2.74155	0.953822	-2.87428	0.00404951	0.0178193	0	0	3.43898	0.971951	6.75082	8.52115	4.41645	11.491
2173	ENSECAG00000043337	7.82758	1.73204	0.602569	2.87442	0.00404767	0.0178193	11.1604	11.4944	10.3169	15.5512	6.75082	2.84038	2.20822	2.29821
2174	ENSECAG00000023650	1.66171	-4.22513	1.4701	-2.87404	0.00405258	0.0178246	0	0	0	0	1.6877	3.78718	5.52056	2.29821
2177	ENSECAG00000010704	36.9761	-1.07713	0.375065	-2.87184	0.0040809	0.0179162	11.1604	17.2417	29.2313	36.9342	59.0697	33.1378	59.6221	49.4114
2178	ENSECAG00000013206	11.9912	-1.43516	0.499708	-2.872	0.00407881	0.0179162	7.44029	7.38928	4.29872	6.80366	13.5016	15.1487	28.7069	12.6401
2179	ENSECAG00000014430	7.92362	-1.7	0.591985	-2.87169	0.00408284	0.0179165	3.72015	5.74722	4.29872	0.971951	10.9701	15.1487	11.0411	11.491
2180	ENSECAG00000005838	3.06715	-3.54616	1.23608	-2.86888	0.00411931	0.018063	1.24005	0.821032	0	0	2.53156	7.57435	6.62467	5.74551
2181	ENSECAG00000023901	24.3768	1.10566	0.385406	2.86883	0.00411999	0.018063	35.9614	41.8726	24.9326	31.1024	21.0963	20.8295	7.72879	11.491
2182	ENSECAG00000013642	10.9201	-1.46883	0.512169	-2.86787	0.0041325	0.0181095	3.72015	6.56825	6.87796	5.83171	16.877	21.7763	17.6658	8.04372
2183	ENSECAG00000005161	13.5064	1.35321	0.4722	2.86576	0.00416016	0.0182158	16.1206	13.9575	25.7923	21.3829	5.06311	7.57435	5.52056	12.6401
2185	ENSECAG00000009496	28.3871	1.10342	0.385166	2.86479	0.00417285	0.0182612	26.041	50.904	31.8105	46.6537	24.4717	23.6698	14.3535	9.19282
2187	ENSECAG00000016365	11.6493	2.02968	0.709762	2.85966	0.00424102	0.0185426	45.8818	11.4944	6.01821	11.6634	3.37541	4.73397	7.72879	2.29821
2188	ENSECAG00000022715	7.91739	1.81008	0.633054	2.85928	0.00424603	0.018556	6.20024	16.4206	14.6157	11.6634	3.37541	0.946794	5.52056	4.59641
2195	ENSECAG00000011704	35.4474	1.05253	0.368527	2.85604	0.00428955	0.0186864	62.0024	34.4833	69.6393	25.2707	21.9402	21.7763	23.1864	25.2803
2197	ENSECAG00000022472	8.64754	-1.62827	0.57022	-2.85551	0.00429676	0.0187037	4.96019	6.56825	2.57923	2.91585	17.7209	14.2019	11.0411	9.19282
2198	ENSECAG00000027974	3.83956	3.87692	1.3578	2.8553	0.00429963	0.0187048	12.4005	4.10516	0.859745	11.6634	1.6877	0	0	0
2203	ENSECAG00000023731	20.1836	-1.11576	0.391397	-2.85072	0.0043621	0.0189335	11.1604	15.5996	6.87796	17.4951	32.0664	32.191	25.3946	20.6838
2205	ENSECAG00000032912	23.8063	-1.14156	0.400592	-2.84968	0.00437638	0.0189782	18.6007	13.9575	12.8962	14.5793	35.4418	52.0737	18.7699	24.1312
2206	ENSECAG00000021889	4.74605	2.40004	0.842419	2.84899	0.00438588	0.0190108	3.72015	10.6734	9.45719	7.77561	0.843852	0.946794	1.10411	3.44731
2210	ENSECAG00000023295	6.14781	2.14605	0.753848	2.84679	0.00441625	0.0191078	6.20024	8.21032	12.8962	12.6354	0	4.73397	2.20822	2.29821
2212	ENSECAG00000008827	9.4978	2.08123	0.731831	2.84387	0.00445697	0.0192665	6.20024	36.9464	8.59745	9.71951	4.21926	4.73397	4.41645	1.1491
2214	ENSECAG00000032875	4.74669	-2.83583	0.997641	-2.84253	0.00447569	0.01933	1.24005	1.64206	0.859745	0.971951	12.6578	16.0955	2.20822	2.29821
2216	ENSECAG00000022673	23.6068	1.20199	0.423126	2.84073	0.00450109	0.0194221	31.0012	17.2417	49.8652	33.0463	8.43852	13.2551	18.7699	17.2365
2218	ENSECAG00000019838	114.868	1.35531	0.477615	2.83766	0.00454455	0.0195949	105.404	333.339	78.2368	143.849	54.0065	124.977	32.0193	47.1132
2220	ENSECAG00000041863	5.06427	-2.18641	0.770907	-2.83616	0.00456602	0.0196668	0	3.28413	1.71949	1.9439	8.43852	10.4147	5.52056	9.19282
2224	ENSECAG00000026818	1.69942	-4.24996	1.49991	-2.83347	0.00460449	0.0197968	0	0	0	0	2.53156	0.946794	5.52056	4.59641
2225	ENSECAG00000009748	1.86886	-4.41891	1.55993	-2.83277	0.00461472	0.019823	0	0	0	0	8.43852	0.946794	4.41645	1.1491
2228	ENSECAG00000008715	5.77251	-2.27261	0.802495	-2.83194	0.00462672	0.0198478	3.72015	0.821032	2.57923	0.971951	4.21926	5.68076	13.2493	14.9383
2229	ENSECAG00000020721	4.87052	-2.29701	0.811104	-2.83196	0.00462636	0.0198478	1.24005	1.64206	2.57923	0.971951	6.75082	7.57435	4.41645	13.7892
2230	ENSECAG00000004439	5.61364	-2.23224	0.78851	-2.83096	0.00464084	0.0198994	2.4801	0	1.71949	3.88781	7.59467	5.68076	14.3535	9.19282
2231	ENSECAG00000016735	11.7367	2.82696	0.999832	2.82743	0.00469228	0.020111	4.96019	0.821032	38.6885	37.9061	5.90697	0	3.31234	2.29821
2232	ENSECAG00000008822	15.3541	1.24994	0.44219	2.8267	0.00470304	0.0201481	34.7214	15.5996	18.0546	18.4671	7.59467	10.4147	9.93701	8.04372
2237	ENSECAG00000008886	15.4225	1.23246	0.436579	2.82301	0.00475757	0.0203361	16.1206	17.2417	25.7923	27.2146	10.1262	7.57435	5.52056	13.7892
2239	ENSECAG00000027690	8.51427	-1.61436	0.571992	-2.82236	0.00476723	0.0203592	3.72015	4.92619	5.15847	2.91585	16.0332	16.0955	6.62467	12.6401
2242	ENSECAG00000011618	72.3671	1.27275	0.451502	2.81893	0.0048184	0.0205502	52.082	161.743	61.9016	134.129	63.2889	55.8608	15.4576	34.4731
2243	ENSECAG00000035074	7.51954	-1.73436	0.615347	-2.8185	0.00482485	0.0205685	7.44029	2.46309	1.71949	2.91585	11.8139	11.3615	13.2493	9.19282
2244	ENSECAG00000017371	10.9179	1.5803	0.561053	2.81667	0.00485243	0.0206769	26.041	18.0627	12.8962	8.74756	4.21926	9.46794	3.31234	4.59641
2245	ENSECAG00000002113	20.312	1.29922	0.461331	2.81624	0.00485895	0.0206954	11.1604	48.4409	27.5118	28.1866	11.8139	15.1487	11.0411	9.19282
2247	ENSECAG00000033876	5.05345	-2.0879	0.741836	-2.81451	0.00488519	0.0207887	2.4801	1.64206	0.859745	2.91585	8.43852	9.46794	7.72879	6.89462
2248	ENSECAG00000023211	1.51645	-4.09576	1.45664	-2.81178	0.00492676	0.0209563	0	0	0	0	2.53156	2.84038	3.31234	3.44731
2249	ENSECAG00000007620	11.2735	1.86146	0.662933	2.80792	0.00498619	0.0211996	3.72015	27.094	14.6157	25.2707	5.06311	7.57435	1.10411	5.74551
2250	ENSECAG00000009668	7.08788	2.3105	0.823152	2.8069	0.00500215	0.021258	23.5609	8.21032	12.0364	3.88781	5.06311	2.84038	1.10411	0
2253	ENSECAG00000026617	1.70775	4.19908	1.49665	2.80566	0.00502137	0.0213113	4.96019	4.92619	0.859745	2.91585	0	0	0	0
2255	ENSECAG00000019485	2.20117	-3.84954	1.37357	-2.80257	0.00506968	0.0214972	0	0	0.859745	0	4.21926	5.68076	1.10411	5.74551
2256	ENSECAG00000018292	4.62179	-2.40703	0.858945	-2.80231	0.00507386	0.0215054	2.4801	0.821032	0	2.91585	10.9701	8.52115	5.52056	5.74551
2258	ENSECAG00000006312	13.4462	1.31814	0.470793	2.79982	0.00511304	0.0216523	22.3209	21.3468	21.4936	11.6634	10.1262	3.78718	9.93701	6.89462
2260	ENSECAG00000010409	12.83	1.32574	0.473787	2.79817	0.00513936	0.0217445	17.3607	18.0627	24.9326	12.6354	5.06311	7.57435	5.52056	11.491
2263	ENSECAG00000024770	15.5654	1.23822	0.442748	2.79667	0.00516326	0.0218166	32.2413	13.1365	24.9326	17.4951	10.1262	8.52115	7.72879	10.3419
2265	ENSECAG00000023133	4.00461	-2.49414	0.892399	-2.79487	0.0051921	0.0219191	2.4801	1.64206	0.859745	0	6.75082	5.68076	7.72879	6.89462
2268	ENSECAG00000009000	7.53924	-1.67286	0.598968	-2.7929	0.00522375	0.0220139	4.96019	3.28413	3.43898	2.91585	8.43852	17.0423	11.0411	9.19282
2269	ENSECAG00000041507	4.31053	-2.39962	0.859157	-2.793	0.00522219	0.0220139	0	2.46309	0.859745	1.9439	8.43852	9.46794	4.41645	6.89462
2270	ENSECAG00000000043	2.03074	4.48434	1.60646	2.79144	0.00524747	0.0220944	0	9.03135	4.29872	2.91585	0	0	0	0
2271	ENSECAG00000022033	1.53611	-4.10964	1.4722	-2.7915	0.00524643	0.0220944	0	0	0	0	2.53156	1.89359	4.41645	3.44731
2272	ENSECAG00000023163	8.43914	-1.75391	0.628395	-2.7911	0.00525295	0.0221077	1.24005	5.74722	4.29872	3.88781	17.7209	18.9359	9.93701	5.74551
2274	ENSECAG00000010369	5.09634	-2.14446	0.768467	-2.79057	0.00526146	0.0221252	1.24005	2.46309	1.71949	1.9439	4.21926	12.3083	8.8329	8.04372
2275	ENSECAG00000018421	11.894	-1.28514	0.460656	-2.78981	0.0052739	0.0221666	8.68034	7.38928	6.01821	5.83171	17.7209	17.0423	20.9781	11.491
2276	ENSECAG00000015399	1.52932	-4.10556	1.47194	-2.78921	0.00528372	0.0221981	0	0	0	0	1.6877	3.78718	3.31234	3.44731
2278	ENSECAG00000010858	13.8132	1.43492	0.514534	2.78877	0.00529085	0.0222086	7.44029	30.3782	21.4936	21.3829	10.9701	7.57435	5.52056	5.74551
2279	ENSECAG00000011072	27.2642	-1.02688	0.368374	-2.78761	0.00530991	0.0222788	13.6405	13.9575	29.2313	14.5793	39.6611	33.1378	47.4768	26.4294
2281	ENSECAG00000036261	17.9376	1.19855	0.430393	2.78477	0.00535655	0.0224548	11.1604	35.3044	25.7923	27.2146	10.9701	9.46794	13.2493	10.3419
2282	ENSECAG00000008379	13.9539	-1.33631	0.48021	-2.78276	0.00538989	0.0225846	4.96019	10.6734	5.15847	10.6915	29.5348	12.3083	18.7699	19.5347
2289	ENSECAG00000033271	2.87042	-3.45036	1.24142	-2.77936	0.00544653	0.0227522	1.24005	0.821032	0	0	6.75082	2.84038	4.41645	6.89462
2291	ENSECAG00000012511	15.2311	-1.2036	0.433354	-2.77741	0.00547941	0.0228695	9.92039	8.21032	11.1767	7.77561	31.2225	15.1487	16.5617	21.8329
2293	ENSECAG00000008651	19.4401	-1.24964	0.450147	-2.77608	0.00550189	0.0229333	9.92039	8.21032	20.6339	6.80366	19.4086	20.8295	37.5398	32.1749
2294	ENSECAG00000016804	3.76099	2.7905	1.00516	2.77619	0.00550007	0.0229333	3.72015	9.85238	5.15847	7.77561	1.6877	1.89359	0	0
2295	ENSECAG00000011708	6.0219	-1.84143	0.663387	-2.7758	0.00550668	0.0229372	3.72015	3.28413	1.71949	1.9439	10.1262	10.4147	6.62467	10.3419
2296	ENSECAG00000020343	5.81782	-2.23094	0.803729	-2.77574	0.00550762	0.0229372	0	1.64206	4.29872	1.9439	16.0332	4.73397	12.1452	5.74551
2297	ENSECAG00000024092	39.1981	-1.08686	0.391619	-2.77531	0.00551486	0.0229574	8.68034	44.3357	27.5118	18.4671	48.0996	49.2333	55.2056	62.0515
2299	ENSECAG00000041447	3.27996	2.97864	1.07339	2.77497	0.00552061	0.0229697	3.72015	4.92619	6.87796	7.77561	0.843852	0.946794	0	1.1491
2301	ENSECAG00000012518	6.3653	-1.82344	0.657344	-2.77396	0.00553792	0.0230133	2.4801	4.10516	1.71949	2.91585	12.6578	11.3615	9.93701	5.74551
2302	ENSECAG00000015026	4.93877	2.42032	0.872617	2.77364	0.00554332	0.0230257	8.68034	7.38928	12.0364	4.85976	0.843852	0	1.10411	4.59641
2305	ENSECAG00000021917	20.8354	-1.07465	0.387987	-2.76982	0.00560881	0.023268	13.6405	12.3155	8.59745	19.439	25.3156	38.8186	20.9781	27.5785
2312	ENSECAG00000023837	4.14472	-2.29045	0.828088	-2.76595	0.00567576	0.0234739	1.24005	1.64206	1.71949	0.971951	7.59467	7.57435	5.52056	6.89462
2313	ENSECAG00000023905	4.61311	-2.15258	0.778364	-2.76551	0.00568333	0.023495	2.4801	0.821032	1.71949	1.9439	6.75082	8.52115	6.62467	8.04372
2315	ENSECAG00000003091	7.9818	-1.67188	0.604966	-2.76359	0.00571694	0.0236034	4.96019	3.28413	6.01821	0.971951	8.43852	14.2019	11.0411	14.9383
2317	ENSECAG00000040154	4.81712	2.52178	0.912565	2.76339	0.00572038	0.0236074	7.44029	13.1365	8.59745	3.88781	1.6877	3.78718	0	0
2320	ENSECAG00000014728	9.41716	2.04645	0.740772	2.76259	0.00573445	0.0236373	6.20024	15.5996	22.3534	16.5232	0.843852	10.4147	1.10411	2.29821
2321	ENSECAG00000016883	14.1622	1.32459	0.479572	2.76203	0.00574436	0.0236655	8.68034	27.9151	18.9144	25.2707	9.28237	8.52115	5.52056	9.19282
2323	ENSECAG00000033703	17.0094	-1.35371	0.490192	-2.7616	0.00575188	0.0236761	21.0808	8.21032	4.29872	5.83171	32.0664	21.7763	20.9781	21.8329
2324	ENSECAG00000004364	11.3659	-1.37542	0.498182	-2.76087	0.00576471	0.0237186	9.92039	4.10516	5.15847	6.80366	21.9402	16.0955	16.5617	10.3419
2325	ENSECAG00000021440	9.43042	1.55905	0.56493	2.75973	0.00578494	0.0237916	14.8806	22.1679	10.3169	8.74756	3.37541	4.73397	6.62467	4.59641
2327	ENSECAG00000011640	16.9214	-1.19996	0.435084	-2.75801	0.0058155	0.0238968	9.92039	6.56825	12.8962	11.6634	27.8471	12.3083	24.2905	29.8767
2330	ENSECAG00000019169	4.16483	-2.29658	0.833947	-2.75387	0.00588947	0.0241696	1.24005	1.64206	1.71949	0.971951	5.90697	9.46794	6.62467	5.74551
2331	ENSECAG00000016809	3.88552	-2.76715	1.00546	-2.75212	0.00592112	0.0242891	2.4801	0	0.859745	0.971951	7.59467	6.62756	2.20822	10.3419
2333	ENSECAG00000019794	10.9054	-1.52154	0.553071	-2.75107	0.00594007	0.0243459	9.92039	4.10516	5.15847	3.88781	16.0332	20.8295	6.62467	20.6838
2339	ENSECAG00000017657	32.4402	1.03605	0.377246	2.74636	0.00602605	0.0246349	60.7624	36.9464	47.286	29.1585	17.7209	13.2551	18.7699	35.6222
2340	ENSECAG00000011530	18.4378	1.48776	0.541912	2.74539	0.00604388	0.0246972	17.3607	21.3468	42.9872	26.2427	3.37541	6.62756	7.72879	21.8329
2341	ENSECAG00000025115	21.7652	1.10056	0.400899	2.74522	0.00604698	0.0246994	21.0808	21.3468	41.2677	34.9902	10.9701	20.8295	12.1452	11.491
2342	ENSECAG00000010731	15.7919	1.22148	0.44523	2.74348	0.00607914	0.0248201	24.801	19.7048	28.3716	15.5512	7.59467	13.2551	4.41645	12.6401
2349	ENSECAG00000012973	23.5169	-1.07844	0.39342	-2.74119	0.00612178	0.0249197	16.1206	18.0627	8.59745	17.4951	18.5647	30.2974	35.3316	43.6659
2352	ENSECAG00000024342	2.0659	3.67328	1.34067	2.73987	0.00614632	0.0249877	4.96019	3.28413	2.57923	4.85976	0.843852	0	0	0
2353	ENSECAG00000018202	22.2662	-1.01996	0.372332	-2.73939	0.00615542	0.0250141	11.1604	13.9575	19.7741	13.6073	37.1295	20.8295	37.5398	24.1312
2354	ENSECAG00000020786	17.3621	-1.18368	0.432141	-2.73912	0.00616047	0.025024	9.92039	10.6734	12.8962	8.74756	15.1893	35.0314	16.5617	29.8767
2356	ENSECAG00000031419	2.97085	3.41363	1.24679	2.73794	0.00618261	0.0250926	6.20024	3.28413	3.43898	8.74756	0	0.946794	0	1.1491
2357	ENSECAG00000037120	3.47045	-3.75402	1.37125	-2.73767	0.00618756	0.025102	0	0.821032	0	0.971951	6.75082	0	7.72879	11.491
2358	ENSECAG00000021413	13.8684	-1.21688	0.444636	-2.73679	0.00620412	0.0251585	4.96019	9.85238	9.45719	8.74756	16.877	28.4038	16.5617	16.0874
2359	ENSECAG00000010535	2.18918	-3.82428	1.39768	-2.73616	0.00621617	0.0251967	0	0.821032	0	0	3.37541	0.946794	6.62467	5.74551
2360	ENSECAG00000015810	17.3778	1.02967	0.376705	2.73337	0.006269	0.0254001	26.041	22.9889	24.0728	20.411	10.1262	15.1487	11.0411	9.19282
2362	ENSECAG00000022112	16.7658	1.14829	0.420224	2.73257	0.00628431	0.0254405	18.6007	22.9889	24.9326	25.2707	6.75082	9.46794	7.72879	18.3856
2363	ENSECAG00000024058	13.6836	-1.2659	0.463709	-2.72995	0.00633447	0.0256327	2.4801	11.4944	8.59745	8.74756	16.877	15.1487	24.2905	21.8329
2364	ENSECAG00000009165	1.9661	-3.6762	1.34698	-2.72921	0.00634856	0.0256572	0	0	0.859745	0	3.37541	4.73397	3.31234	3.44731
2366	ENSECAG00000032131	10.7757	-1.37879	0.505186	-2.72926	0.00634759	0.0256572	4.96019	3.28413	6.01821	9.71951	13.5016	17.0423	12.1452	19.5347
2370	ENSECAG00000030952	4.17331	-3.38215	1.2404	-2.72667	0.00639778	0.0258125	1.24005	0	1.71949	0	2.53156	0.946794	15.4576	11.491
2371	ENSECAG00000004464	5.36595	-2.05081	0.752201	-2.72641	0.00640279	0.0258218	1.24005	1.64206	3.43898	1.9439	13.5016	6.62756	9.93701	4.59641
2372	ENSECAG00000005510	4.1929	-2.62793	0.96422	-2.72544	0.00642149	0.0258863	0	1.64206	0.859745	1.9439	4.21926	6.62756	3.31234	14.9383
2374	ENSECAG00000017003	21.5416	-1.12848	0.414342	-2.72354	0.00645865	0.0260067	19.8408	9.03135	19.7741	5.83171	27.8471	31.2442	24.2905	34.4731
2375	ENSECAG00000024698	20.6907	1.01797	0.373773	2.7235	0.00645951	0.0260067	22.3209	25.452	28.3716	34.9902	16.0332	17.9891	7.72879	12.6401
2376	ENSECAG00000023135	8.05523	-1.87584	0.688882	-2.72301	0.00646891	0.0260336	2.4801	6.56825	1.71949	2.91585	13.5016	22.7231	9.93701	4.59641
2377	ENSECAG00000019008	4.8256	-2.26594	0.832544	-2.72171	0.00649453	0.0261257	1.24005	0	3.43898	1.9439	5.90697	11.3615	5.52056	9.19282
2378	ENSECAG00000036667	1.52595	-4.13074	1.51786	-2.72143	0.00650001	0.0261367	0	0	0	0	5.06311	3.78718	2.20822	1.1491
2379	ENSECAG00000011994	3.92457	-2.85858	1.05046	-2.72126	0.00650329	0.0261389	0	0.821032	0	2.91585	2.53156	10.4147	5.52056	9.19282
2380	ENSECAG00000016860	8.56906	2.09648	0.770468	2.72105	0.00650752	0.0261449	2.4801	29.5571	7.7377	15.5512	1.6877	4.73397	2.20822	4.59641
2383	ENSECAG00000022117	3.30707	2.98631	1.09795	2.71991	0.00653	0.0262022	7.44029	4.10516	4.29872	7.77561	1.6877	0	0	1.1491
2386	ENSECAG00000043065	2.80196	3.36934	1.23979	2.71766	0.0065745	0.0263476	3.72015	4.10516	7.7377	4.85976	0.843852	0	0	1.1491
2388	ENSECAG00000021036	21.1444	-1.59735	0.588247	-2.71544	0.00661888	0.0265032	24.801	3.28413	5.15847	9.71951	12.6578	35.0314	47.4768	31.0258
2389	ENSECAG00000000614	8.75114	-1.484	0.546592	-2.715	0.00662761	0.026516	6.20024	2.46309	5.15847	4.85976	12.6578	9.46794	16.5617	12.6401
2390	ENSECAG00000008332	10.8809	-1.30323	0.47999	-2.71511	0.00662531	0.026516	7.44029	4.10516	6.87796	6.80366	11.8139	15.1487	18.7699	16.0874
2391	ENSECAG00000018363	6.50057	2.17297	0.800497	2.71453	0.00663694	0.0265422	11.1604	18.0627	5.15847	7.77561	0	1.89359	2.20822	5.74551
2394	ENSECAG00000014773	4.15083	2.50796	0.924958	2.71143	0.00669934	0.0267582	9.92039	8.21032	3.43898	6.80366	0.843852	2.84038	0	1.1491
2395	ENSECAG00000012945	1.73357	-4.2771	1.57798	-2.71049	0.00671846	0.0268121	0	0	0	0	0.843852	1.89359	8.8329	2.29821
2396	ENSECAG00000022195	62.549	-1.05235	0.388242	-2.71055	0.0067171	0.0268121	9.92039	45.1567	55.8834	50.5415	78.4783	64.382	96.0578	99.9719
2397	ENSECAG00000014365	11.0283	1.29797	0.47902	2.70963	0.00673578	0.0268701	14.8806	13.1365	14.6157	20.411	8.43852	6.62756	5.52056	4.59641
2398	ENSECAG00000016968	11.6255	1.43832	0.531138	2.70799	0.00676921	0.0269921	16.1206	11.4944	27.5118	12.6354	5.90697	5.68076	3.31234	10.3419
2399	ENSECAG00000013890	24.9072	-1.10619	0.408696	-2.70664	0.00679684	0.027091	22.3209	13.1365	20.6339	7.77561	50.6311	34.0846	25.3946	25.2803
2401	ENSECAG00000024662	1.57018	-4.16249	1.53834	-2.70584	0.00681318	0.0271398	0	0	0	0	2.53156	6.62756	1.10411	2.29821
2402	ENSECAG00000011345	4.38481	-2.45295	0.907175	-2.70394	0.00685226	0.0272778	0	2.46309	2.57923	0	9.28237	3.78718	6.62467	10.3419
2403	ENSECAG00000001041	2.22241	3.80063	1.40584	2.70346	0.00686219	0.027306	1.24005	6.56825	6.87796	1.9439	0	0	0	1.1491
2406	ENSECAG00000026958	7.07919	2.31285	0.856872	2.69918	0.00695113	0.0276254	17.3607	1.64206	17.1949	10.6915	0.843852	0.946794	2.20822	5.74551
2409	ENSECAG00000015746	5.86013	2.26382	0.839346	2.69713	0.00699409	0.0277615	1.24005	8.21032	15.4754	13.6073	0.843852	1.89359	3.31234	2.29821
2411	ENSECAG00000026997	1.544	-4.14182	1.53613	-2.69628	0.00701189	0.0278179	0	0	0	0	5.90697	1.89359	1.10411	3.44731
2412	ENSECAG00000018112	11.8426	1.5556	0.576996	2.69603	0.00701703	0.0278179	6.20024	11.4944	28.3716	24.2988	5.06311	4.73397	8.8329	5.74551
2413	ENSECAG00000013962	1.48554	-4.07459	1.5122	-2.69447	0.00705001	0.0279255	0	0	0	0	2.53156	3.78718	4.41645	1.1491
2414	ENSECAG00000015188	5.97992	-1.84133	0.683346	-2.69459	0.00704763	0.0279255	2.4801	3.28413	0.859745	3.88781	10.1262	10.4147	11.0411	5.74551
2416	ENSECAG00000006878	6.45639	1.7391	0.645671	2.69349	0.00707093	0.0279736	13.6405	7.38928	11.1767	7.77561	3.37541	3.78718	2.20822	2.29821
2417	ENSECAG00000035469	9.0175	-1.52306	0.565412	-2.69372	0.00706585	0.0279736	8.68034	3.28413	5.15847	1.9439	13.5016	10.4147	17.6658	11.491
2418	ENSECAG00000007072	5.6358	-1.91915	0.712681	-2.69287	0.00708407	0.028014	1.24005	2.46309	2.57923	2.91585	6.75082	7.57435	6.62467	14.9383
2420	ENSECAG00000016596	6.44124	2.06124	0.766214	2.69017	0.00714163	0.0282183	21.0808	6.56825	10.3169	3.88781	2.53156	3.78718	2.20822	1.1491
2421	ENSECAG00000010401	13.4439	-1.1665	0.433751	-2.68932	0.00715972	0.0282781	6.20024	9.03135	6.01821	11.6634	15.1893	18.9359	20.9781	19.5347
2423	ENSECAG00000016431	11.6534	-1.59949	0.595052	-2.68799	0.0071884	0.0283679	13.6405	3.28413	5.15847	1.9439	27.8471	13.2551	15.4576	12.6401
2425	ENSECAG00000009351	1.46425	-4.05818	1.51081	-2.68609	0.00722937	0.0285061	0	0	0	0	3.37541	3.78718	1.10411	3.44731
2427	ENSECAG00000011680	25.9529	-1.12928	0.420747	-2.68399	0.00727484	0.0286617	26.041	13.1365	20.6339	5.83171	34.5979	35.9782	24.2905	47.1132
2431	ENSECAG00000032605	4.27094	-2.35779	0.879365	-2.68124	0.00733489	0.0288508	0	1.64206	0.859745	2.91585	5.06311	11.3615	7.72879	4.59641
2433	ENSECAG00000034242	5.31592	-2.21062	0.825094	-2.67924	0.00737906	0.0290006	2.4801	3.28413	0	1.9439	15.1893	9.46794	4.41645	5.74551
2435	ENSECAG00000020442	7.53298	-1.65587	0.618331	-2.67797	0.0074069	0.0290862	1.24005	5.74722	4.29872	2.91585	16.877	12.3083	8.8329	8.04372
2436	ENSECAG00000033164	3.89578	-3.35803	1.25409	-2.67767	0.00741365	0.0291007	0	0	2.57923	0	5.06311	0.946794	9.93701	12.6401
2437	ENSECAG00000023981	6.94623	1.75113	0.654155	2.67693	0.00743001	0.029153	13.6405	13.9575	7.7377	7.77561	3.37541	5.68076	1.10411	2.29821
2438	ENSECAG00000015633	7.12056	-1.59506	0.596018	-2.67619	0.0074465	0.0292057	3.72015	3.28413	5.15847	1.9439	10.9701	10.4147	8.8329	12.6401
2439	ENSECAG00000011144	15.8841	-1.37173	0.512718	-2.67541	0.00746379	0.0292615	18.6007	5.74722	5.15847	6.80366	16.0332	25.5634	34.2275	14.9383
2440	ENSECAG00000006626	11.0633	1.36824	0.511452	2.6752	0.00746847	0.0292678	24.801	15.5996	10.3169	13.6073	7.59467	7.57435	4.41645	4.59641
2441	ENSECAG00000020052	2.26752	3.85695	1.44341	2.67212	0.00753748	0.0295262	1.24005	10.6734	3.43898	1.9439	0.843852	0	0	0
2442	ENSECAG00000008016	3.54014	2.61635	0.979304	2.67164	0.00754814	0.0295558	7.44029	4.10516	5.15847	7.77561	0.843852	1.89359	1.10411	0
2443	ENSECAG00000010533	1.46587	-4.06024	1.51987	-2.67143	0.00755282	0.029562	0	0	0	0	2.53156	4.73397	3.31234	1.1491
2445	ENSECAG00000013433	53.2719	1.00065	0.374663	2.6708	0.00756711	0.0295937	114.084	51.725	67.9198	51.5134	56.5381	22.7231	37.5398	24.1312
2446	ENSECAG00000021161	27.9119	-1.51351	0.566967	-2.66949	0.00759672	0.0296974	37.2015	9.03135	6.87796	5.83171	19.4086	36.925	56.3097	51.7096
2448	ENSECAG00000006607	52.2225	2.33941	0.877482	2.66604	0.00767495	0.0299664	21.0808	152.712	73.0783	102.055	9.28237	40.7121	16.5617	2.29821
2450	ENSECAG00000006090	4.76237	2.15096	0.807422	2.66399	0.00772203	0.0301257	4.96019	7.38928	6.01821	12.6354	1.6877	0.946794	3.31234	1.1491
2452	ENSECAG00000010971	3.00731	-2.94789	1.10686	-2.66329	0.00773802	0.0301758	0	1.64206	0	0.971951	6.75082	5.68076	4.41645	4.59641
2455	ENSECAG00000017202	20.4116	1.28623	0.483574	2.65983	0.0078179	0.03045	29.7612	41.0516	17.1949	28.1866	16.877	11.3615	16.5617	2.29821
2458	ENSECAG00000016632	25.5011	-1.0406	0.391386	-2.65876	0.00784294	0.0305103	14.8806	27.094	12.8962	11.6634	37.9733	46.3929	22.0822	31.0258
2459	ENSECAG00000005701	1.49634	-4.08064	1.53533	-2.65782	0.0078649	0.0305832	0	0	0	0	4.21926	0.946794	2.20822	4.59641
2460	ENSECAG00000014320	24.0446	-1.09048	0.410371	-2.65731	0.0078767	0.0306167	27.2811	7.38928	17.1949	10.6915	41.3488	26.5102	30.9151	31.0258
2462	ENSECAG00000012863	10.641	1.86985	0.704126	2.65557	0.00791754	0.0307504	33.4813	16.4206	7.7377	9.71951	8.43852	4.73397	0	4.59641
2463	ENSECAG00000012646	8.25446	1.57608	0.593623	2.65501	0.00793058	0.0307885	7.44029	17.2417	11.1767	13.6073	4.21926	5.68076	5.52056	1.1491
2464	ENSECAG00000020847	5.51079	1.96894	0.741798	2.65428	0.0079478	0.0308429	9.92039	9.03135	10.3169	5.83171	3.37541	0	3.31234	2.29821
2465	ENSECAG00000005459	16.0586	1.03453	0.389792	2.65406	0.00795307	0.0308508	24.801	21.3468	19.7741	20.411	10.9701	7.57435	13.2493	10.3419
2467	ENSECAG00000024196	65.5399	1.28001	0.482588	2.65238	0.00799272	0.0309795	17.3607	176.522	80.816	96.2232	39.6611	35.9782	37.5398	40.2186
2468	ENSECAG00000024750	1.57742	-4.16765	1.57211	-2.65099	0.00802562	0.0310944	0	0	0	0	1.6877	7.57435	2.20822	1.1491
2470	ENSECAG00000020505	3.65556	-2.42973	0.917125	-2.64929	0.008066	0.0312377	0	2.46309	0.859745	0.971951	5.90697	6.62756	5.52056	6.89462
2471	ENSECAG00000024506	3.26661	-3.00745	1.13532	-2.649	0.0080731	0.0312404	0	0	0	2.91585	4.21926	6.62756	6.62467	5.74551
2473	ENSECAG00000011804	1.43625	-4.00587	1.51358	-2.64662	0.00813011	0.0314355	0	0	0	0	1.6877	1.89359	3.31234	4.59641
2475	ENSECAG00000019718	7.43254	-1.59352	0.602249	-2.64594	0.00814632	0.0314728	1.24005	5.74722	2.57923	4.85976	10.1262	11.3615	14.3535	9.19282
2476	ENSECAG00000005666	11.1358	1.39285	0.526466	2.64566	0.00815327	0.0314869	9.92039	10.6734	20.6339	23.3268	6.75082	7.57435	3.31234	6.89462
2480	ENSECAG00000011243	20.2564	1.10408	0.418367	2.63903	0.00831436	0.0320443	37.2015	25.452	30.0911	17.4951	5.90697	13.2551	16.5617	16.0874
2481	ENSECAG00000012609	4.53151	-2.14887	0.814216	-2.63919	0.00831048	0.0320443	1.24005	0.821032	2.57923	1.9439	6.75082	3.78718	9.93701	9.19282
2482	ENSECAG00000029848	6.48903	-1.75682	0.665747	-2.63886	0.00831846	0.0320472	6.20024	2.46309	2.57923	0.971951	6.75082	10.4147	11.0411	11.491
2484	ENSECAG00000012896	5.12689	-2.16554	0.821417	-2.63635	0.0083803	0.0322594	0	0	3.43898	3.88781	9.28237	7.57435	9.93701	6.89462
2485	ENSECAG00000013207	1.4506	3.9667	1.50544	2.63491	0.00841599	0.0323838	3.72015	1.64206	4.29872	1.9439	0	0	0	0
2486	ENSECAG00000007611	24.3545	1.00444	0.381411	2.63349	0.00845128	0.0325065	42.1617	26.273	37.8288	23.3268	10.1262	12.3083	20.9781	21.8329
2488	ENSECAG00000000203	2.63086	3.29706	1.25334	2.63061	0.00852314	0.0327565	2.4801	4.92619	6.01821	5.83171	0.843852	0.946794	0	0
2489	ENSECAG00000008840	15.2662	1.22744	0.466625	2.63046	0.00852704	0.0327584	13.6405	33.6623	13.7559	24.2988	10.9701	6.62756	8.8329	10.3419
2492	ENSECAG00000014314	12.7043	1.51549	0.57642	2.62914	0.00856002	0.0328455	4.96019	32.0202	20.6339	17.4951	7.59467	7.57435	3.31234	8.04372
2493	ENSECAG00000026943	15.1397	-1.24171	0.472469	-2.62813	0.00858549	0.03293	17.3607	4.10516	8.59745	6.80366	16.0332	26.5102	19.874	21.8329
2494	ENSECAG00000017001	10.1403	-1.43887	0.547934	-2.62599	0.00863978	0.0331249	6.20024	6.56825	6.01821	2.91585	10.9701	10.4147	25.3946	12.6401
2496	ENSECAG00000023008	3.2769	-2.61534	0.99651	-2.6245	0.00867758	0.0332299	0	1.64206	0.859745	0.971951	5.90697	6.62756	3.31234	6.89462
2498	ENSECAG00000029568	4.97773	2.51835	0.959618	2.62433	0.008682	0.0332335	2.4801	3.28413	15.4754	12.6354	1.6877	0.946794	3.31234	0
2501	ENSECAG00000020251	12.7255	1.2174	0.464587	2.6204	0.00878272	0.0335787	12.4005	17.2417	17.1949	24.2988	9.28237	6.62756	4.41645	10.3419
2502	ENSECAG00000013494	1.50022	-4.10908	1.56889	-2.61911	0.00881602	0.0336925	0	0	0	0	6.75082	1.89359	2.20822	1.1491
2506	ENSECAG00000015715	3.46287	-3.12351	1.19435	-2.61524	0.00891649	0.0340221	1.24005	1.64206	0	0	8.43852	3.78718	1.10411	11.491
2507	ENSECAG00000015042	2.05442	3.62028	1.38539	2.61318	0.00897031	0.0342002	7.44029	2.46309	3.43898	1.9439	0	0	0	1.1491
2508	ENSECAG00000024068	1.44621	-4.0452	1.54792	-2.61332	0.00896681	0.0342002	0	0	0	0	2.53156	5.68076	2.20822	1.1491
2510	ENSECAG00000005737	1.84212	-3.57659	1.37058	-2.60954	0.00906634	0.0345299	0	0	0.859745	0	3.37541	3.78718	4.41645	2.29821
2512	ENSECAG00000007008	16.3572	-1.09911	0.421298	-2.60887	0.00908422	0.0345656	14.8806	11.4944	8.59745	6.80366	15.1893	20.8295	23.1864	29.8767
2514	ENSECAG00000010695	1.47444	3.98312	1.52685	2.60871	0.00908833	0.0345675	4.96019	3.28413	2.57923	0.971951	0	0	0	0
2515	ENSECAG00000000532	16.6362	-1.33986	0.513737	-2.60807	0.00910547	0.0346189	1.24005	17.2417	7.7377	10.6915	20.2525	32.191	26.4987	17.2365
2516	ENSECAG00000010447	105.301	-1.26222	0.484198	-2.60683	0.00913853	0.0347308	124.005	18.8837	81.6757	24.2988	172.146	96.573	150.159	174.664
2517	ENSECAG00000022185	1.34028	-3.93167	1.50852	-2.60631	0.00915224	0.034769	0	0	0	0	3.37541	2.84038	2.20822	2.29821
2519	ENSECAG00000012321	4.72377	-1.97437	0.757721	-2.60567	0.0091696	0.0348074	2.4801	2.46309	0.859745	1.9439	5.90697	9.46794	6.62467	8.04372
2521	ENSECAG00000018476	66.9196	2.36773	0.909034	2.60467	0.00919632	0.0348811	17.3607	229.068	74.7978	127.326	11.8139	55.8608	9.93701	9.19282
2522	ENSECAG00000006293	7.27597	1.60417	0.616186	2.60338	0.00923089	0.0349983	9.92039	9.85238	12.8962	10.6915	1.6877	1.89359	5.52056	5.74551
2523	ENSECAG00000008102	6.46853	-1.73042	0.664978	-2.60223	0.00926209	0.0351027	0	3.28413	3.43898	4.85976	10.1262	8.52115	7.72879	13.7892
2524	ENSECAG00000008748	21.4352	-1.02276	0.393274	-2.60063	0.00930541	0.0352389	11.1604	13.9575	17.1949	13.6073	15.1893	28.4038	38.6439	33.324
2527	ENSECAG00000008193	28.6819	1.297	0.499488	2.59665	0.00941369	0.0356067	17.3607	86.2083	23.2131	35.9622	13.5016	22.7231	13.2493	17.2365
2529	ENSECAG00000020243	5.64597	-1.80255	0.694317	-2.59616	0.0094273	0.03563	1.24005	4.10516	3.43898	0.971951	10.1262	9.46794	6.62467	9.19282
2530	ENSECAG00000020394	2.57639	3.25001	1.25182	2.59622	0.00942563	0.03563	4.96019	4.92619	6.01821	2.91585	0.843852	0.946794	0	0
2531	ENSECAG00000023859	15.2533	1.15079	0.443441	2.59513	0.00945551	0.0357225	18.6007	23.8099	20.6339	21.3829	16.0332	4.73397	9.93701	6.89462
2533	ENSECAG00000008933	12.7576	-1.27118	0.490044	-2.59402	0.0094862	0.0358101	11.1604	7.38928	8.59745	2.91585	10.9701	22.7231	18.7699	19.5347
2534	ENSECAG00000016204	5.00124	-2.29094	0.883806	-2.59213	0.0095383	0.0359926	2.4801	0.821032	2.57923	0.971951	2.53156	9.46794	16.5617	4.59641
2536	ENSECAG00000008614	5.92045	-1.80223	0.695699	-2.59053	0.00958278	0.0361319	2.4801	0.821032	4.29872	2.91585	5.90697	9.46794	8.8329	12.6401
2537	ENSECAG00000008381	12.0245	1.30179	0.502729	2.58944	0.00961323	0.0362324	27.2811	16.4206	12.0364	12.6354	5.06311	4.73397	8.8329	9.19282
2538	ENSECAG00000011777	7.89085	-1.42838	0.551735	-2.58889	0.00962846	0.0362755	4.96019	4.92619	4.29872	2.91585	10.1262	12.3083	13.2493	10.3419
2539	ENSECAG00000022638	5.51122	-1.84131	0.711273	-2.58876	0.00963233	0.0362758	2.4801	0.821032	3.43898	2.91585	7.59467	7.57435	6.62467	12.6401
2540	ENSECAG00000017228	12.5198	-1.4758	0.570433	-2.58717	0.00967686	0.0364292	12.4005	3.28413	10.3169	0.971951	21.9402	15.1487	16.5617	19.5347
2547	ENSECAG00000024843	4.12335	-2.20479	0.853656	-2.58276	0.00980122	0.0367959	2.4801	0	1.71949	1.9439	5.90697	8.52115	5.52056	6.89462
2548	ENSECAG00000008876	7.57005	1.4767	0.571877	2.5822	0.00981726	0.0368417	11.1604	12.3155	10.3169	10.6915	2.53156	5.68076	4.41645	3.44731
2549	ENSECAG00000010619	18.7616	1.14437	0.443266	2.58169	0.00983178	0.0368817	18.6007	32.8413	25.7923	26.2427	10.1262	21.7763	5.52056	9.19282
2550	ENSECAG00000020269	6.87801	1.55424	0.602129	2.58125	0.00984442	0.0369146	7.44029	10.6734	12.0364	10.6915	2.53156	3.78718	4.41645	3.44731
2551	ENSECAG00000018438	62.9215	2.0793	0.805871	2.58019	0.00987471	0.0370137	24.801	206.9	63.6211	111.774	14.3455	55.8608	8.8329	17.2365
2552	ENSECAG00000007024	3.66164	-2.64259	1.02436	-2.57976	0.00988691	0.0370449	2.4801	0	0	1.9439	6.75082	4.73397	9.93701	3.44731
2554	ENSECAG00000004617	14.6139	-1.24523	0.483118	-2.57749	0.00995222	0.0372604	3.72015	9.85238	14.6157	5.83171	19.4086	19.8827	29.811	13.7892
2557	ENSECAG00000002233	14.3785	-1.50581	0.58529	-2.57275	0.0100894	0.0377003	2.4801	6.56825	12.8962	7.77561	40.5049	17.9891	18.7699	8.04372
2558	ENSECAG00000002759	8.71092	-1.44481	0.561572	-2.5728	0.010088	0.0377003	8.68034	2.46309	4.29872	3.88781	14.3455	11.3615	15.4576	9.19282
2562	ENSECAG00000009178	9.68916	-1.26913	0.493554	-2.5714	0.0101287	0.0378029	6.20024	5.74722	6.87796	3.88781	12.6578	15.1487	14.3535	12.6401
2564	ENSECAG00000010024	1.42946	-4.00272	1.55716	-2.57052	0.0101547	0.0378553	0	0	0	0	0.843852	3.78718	2.20822	4.59641
2565	ENSECAG00000012952	8.66636	1.38889	0.54031	2.57055	0.0101536	0.0378553	14.8806	12.3155	10.3169	12.6354	4.21926	3.78718	7.72879	3.44731
2566	ENSECAG00000007801	18.3466	1.02123	0.397378	2.56991	0.0101725	0.0378852	22.3209	20.5258	36.969	18.4671	12.6578	13.2551	9.93701	12.6401
2567	ENSECAG00000014795	9.94438	-1.36572	0.531432	-2.5699	0.0101729	0.0378852	1.24005	4.92619	7.7377	7.77561	11.8139	12.3083	17.6658	16.0874
2572	ENSECAG00000041804	1.45475	-4.02252	1.56646	-2.5679	0.0102316	0.0380382	0	0	0	0	0.843852	2.84038	2.20822	5.74551
2573	ENSECAG00000009116	21.1625	-1.07832	0.419947	-2.56775	0.0102361	0.0380404	24.801	9.03135	12.8962	8.74756	33.7541	27.457	34.2275	18.3856
2575	ENSECAG00000003682	1.45907	-4.05484	1.57997	-2.5664	0.0102759	0.0381585	0	0	0	0	1.6877	6.62756	2.20822	1.1491
2576	ENSECAG00000008452	31.9506	-1.04432	0.406965	-2.56612	0.0102843	0.0381749	7.44029	30.3782	19.7741	25.2707	54.8504	53.9673	38.6439	25.2803
2579	ENSECAG00000017915	6.15511	-1.82159	0.710136	-2.56513	0.0103136	0.0382391	6.20024	1.64206	2.57923	0.971951	10.1262	14.2019	6.62467	6.89462
2582	ENSECAG00000024950	2.70873	-3.37474	1.31717	-2.56211	0.0104039	0.0385291	0	0	1.71949	0	2.53156	2.84038	8.8329	5.74551
2584	ENSECAG00000018711	38.907	-1.04758	0.409928	-2.55554	0.0106025	0.0392037	9.92039	17.2417	40.408	33.0463	48.0996	33.1378	67.3508	62.0515
2585	ENSECAG00000024161	1.35232	3.85846	1.50982	2.55557	0.0106014	0.0392037	3.72015	2.46309	1.71949	2.91585	0	0	0	0
2586	ENSECAG00000041793	1.35232	3.85846	1.50982	2.55557	0.0106014	0.0392037	3.72015	2.46309	1.71949	2.91585	0	0	0	0
2588	ENSECAG00000019884	183.36	1.02222	0.400141	2.55464	0.0106296	0.0392738	435.257	204.437	234.71	109.831	195.774	124.03	92.7454	70.0953
2589	ENSECAG00000023825	7.84054	-1.56542	0.613011	-2.55365	0.01066	0.0393708	2.4801	5.74722	4.29872	2.91585	5.90697	14.2019	9.93701	17.2365
2590	ENSECAG00000014701	15.8245	1.21858	0.477403	2.55251	0.0106949	0.0394691	12.4005	27.094	13.7559	34.9902	7.59467	9.46794	13.2493	8.04372
2591	ENSECAG00000015220	3.41932	-2.67067	1.04628	-2.55253	0.0106943	0.0394691	0	1.64206	0	1.9439	5.06311	7.57435	8.8329	2.29821
2592	ENSECAG00000007212	8.67086	1.57189	0.615925	2.55207	0.0107084	0.0395038	23.5609	6.56825	11.1767	10.6915	3.37541	3.78718	3.31234	6.89462
2594	ENSECAG00000009836	12.1699	1.23563	0.484404	2.55083	0.0107466	0.0396142	19.8408	18.0627	20.6339	9.71951	8.43852	3.78718	8.8329	8.04372
2597	ENSECAG00000003054	1.37961	-3.96207	1.55477	-2.54834	0.0108238	0.0398526	0	0	0	0	3.37541	0.946794	4.41645	2.29821
2598	ENSECAG00000000092	1.9457	-4.45403	1.75099	-2.54372	0.010968	0.040368	0	0	0	0	3.37541	0	11.0411	1.1491
2601	ENSECAG00000023392	7.51401	1.44962	0.570578	2.54062	0.0110655	0.0406902	11.1604	9.03135	12.0364	11.6634	3.37541	3.78718	3.31234	5.74551
2602	ENSECAG00000026894	3.71441	-2.41047	0.949361	-2.53904	0.0111156	0.0408485	1.24005	0.821032	2.57923	0	5.06311	6.62756	9.93701	3.44731
2603	ENSECAG00000025137	14.6035	-1.03285	0.406842	-2.53871	0.0111263	0.0408721	11.1604	7.38928	11.1767	8.74756	16.877	20.8295	17.6658	22.9821
2604	ENSECAG00000029965	5.86498	-1.67197	0.658725	-2.53819	0.0111427	0.0409165	1.24005	3.28413	2.57923	3.88781	10.1262	6.62756	8.8329	10.3419
2606	ENSECAG00000018135	5.61614	-2.05154	0.808652	-2.53699	0.0111809	0.0410252	2.4801	0	2.57923	3.88781	12.6578	6.62756	13.2493	3.44731
2608	ENSECAG00000029728	1.79108	-3.53694	1.3948	-2.5358	0.011219	0.0411336	0	0	0	0.971951	5.06311	3.78718	2.20822	2.29821
2613	ENSECAG00000039852	13.7902	-1.0364	0.409415	-2.53141	0.0113606	0.0415729	9.92039	9.85238	8.59745	7.77561	16.0332	19.8827	19.874	18.3856
2617	ENSECAG00000008660	4.83505	1.94781	0.771378	2.5251	0.0115664	0.0422613	7.44029	9.85238	9.45719	3.88781	1.6877	1.89359	3.31234	1.1491
2618	ENSECAG00000016669	52.6017	1.04042	0.412143	2.52441	0.0115894	0.0423291	32.2413	42.6936	108.328	99.139	22.784	33.1378	34.2275	48.2623
2620	ENSECAG00000010077	1.64313	-4.2318	1.67765	-2.52245	0.0116541	0.0425331	0	0	0	0	4.21926	6.62756	0	2.29821
2621	ENSECAG00000010739	3.01519	-2.90384	1.15137	-2.52207	0.0116667	0.042539	1.24005	0.821032	0.859745	0	5.06311	9.46794	5.52056	1.1491
2622	ENSECAG00000020670	8.84214	-1.37438	0.544914	-2.5222	0.0116624	0.042539	3.72015	4.10516	5.15847	6.80366	18.5647	13.2551	9.93701	9.19282
2624	ENSECAG00000010288	7.02221	1.60701	0.637275	2.52169	0.0116791	0.0425431	9.92039	14.7786	6.87796	10.6915	4.21926	2.84038	1.10411	5.74551
2625	ENSECAG00000026944	11.7966	-1.39198	0.551994	-2.52174	0.0116777	0.0425431	11.1604	9.85238	3.43898	1.9439	17.7209	18.9359	20.9781	10.3419
2626	ENSECAG00000003943	2.60578	-3.36637	1.33562	-2.52045	0.0117205	0.0426452	0	1.64206	0	0	5.90697	6.62756	5.52056	1.1491
2627	ENSECAG00000008461	2.06595	3.70677	1.47065	2.5205	0.0117189	0.0426452	1.24005	8.21032	5.15847	0.971951	0	0.946794	0	0
2631	ENSECAG00000033122	10.2542	-1.32105	0.524291	-2.5197	0.0117456	0.0426863	4.96019	4.10516	10.3169	3.88781	14.3455	16.0955	9.93701	18.3856
2633	ENSECAG00000035041	1.34707	-3.93558	1.56215	-2.51934	0.0117574	0.0426982	0	0	0	0	4.21926	0.946794	3.31234	2.29821
2635	ENSECAG00000015344	2.39197	-3.21614	1.27683	-2.51886	0.0117736	0.0427246	0	0.821032	0.859745	0	6.75082	2.84038	4.41645	3.44731
2638	ENSECAG00000022649	12.5715	1.22144	0.485145	2.51768	0.0118129	0.0428184	13.6405	23.8099	14.6157	18.4671	9.28237	8.52115	9.93701	2.29821
2639	ENSECAG00000012907	3.85504	-2.16618	0.8609	-2.51618	0.0118636	0.0429857	1.24005	0.821032	2.57923	0.971951	8.43852	6.62756	4.41645	5.74551
2640	ENSECAG00000008412	13.3401	-1.19403	0.474631	-2.5157	0.0118797	0.0430278	3.72015	10.6734	5.15847	12.6354	19.4086	23.6698	17.6658	13.7892
2641	ENSECAG00000005529	1.82175	3.47196	1.38057	2.51487	0.0119077	0.0430913	4.96019	3.28413	3.43898	1.9439	0	0.946794	0	0
2642	ENSECAG00000010025	2.51592	-3.27377	1.30181	-2.51478	0.0119107	0.0430913	0	0.821032	0	0.971951	6.75082	4.73397	1.10411	5.74551
2645	ENSECAG00000010381	10.9543	-1.2372	0.492191	-2.51365	0.0119487	0.0431962	6.20024	9.03135	6.87796	3.88781	21.0963	12.3083	12.1452	16.0874
2647	ENSECAG00000004395	8.16135	-1.36896	0.544729	-2.51309	0.0119677	0.0432261	6.20024	4.10516	5.15847	2.91585	12.6578	9.46794	12.1452	12.6401
2649	ENSECAG00000034739	18.2146	-1.25386	0.499	-2.51274	0.0119796	0.0432261	2.4801	21.3468	6.87796	11.6634	32.0664	27.457	24.2905	19.5347
2650	ENSECAG00000040984	6.56314	-1.91303	0.761271	-2.51294	0.011973	0.0432261	4.96019	0	2.57923	3.88781	5.06311	17.9891	8.8329	9.19282
2651	ENSECAG00000013627	12.0364	1.30596	0.519766	2.5126	0.0119846	0.0432277	19.8408	11.4944	18.0546	19.439	6.75082	8.52115	11.0411	1.1491
2652	ENSECAG00000021388	11.8829	-1.26473	0.503419	-2.51227	0.0119956	0.0432511	3.72015	9.85238	6.01821	7.77561	13.5016	10.4147	25.3946	18.3856
2654	ENSECAG00000014003	17.6346	-1.05204	0.41893	-2.51125	0.0120306	0.0433446	14.8806	12.3155	12.8962	5.83171	17.7209	23.6698	34.2275	19.5347
2655	ENSECAG00000007184	10.2483	1.33975	0.533666	2.51047	0.012057	0.043407	14.8806	7.38928	18.9144	17.4951	4.21926	6.62756	4.41645	8.04372
2656	ENSECAG00000015110	9.77494	-1.36021	0.541797	-2.51054	0.0120545	0.043407	7.44029	7.38928	2.57923	4.85976	18.5647	17.0423	8.8329	11.491
2657	ENSECAG00000013179	3.20259	-3.01639	1.20208	-2.5093	0.012097	0.0435347	0	0	1.71949	0.971951	0.843852	8.52115	5.52056	8.04372
2660	ENSECAG00000026808	16.5905	-1.06125	0.423335	-2.50687	0.0121805	0.0437855	14.8806	6.56825	9.45719	12.6354	17.7209	25.5634	29.811	16.0874
2661	ENSECAG00000030065	10.8572	-1.22151	0.487318	-2.50661	0.0121896	0.043802	9.92039	5.74722	5.15847	5.83171	19.4086	16.0955	14.3535	10.3419
2662	ENSECAG00000017673	14.9372	-1.37801	0.549923	-2.50583	0.0122163	0.0438814	16.1206	4.92619	6.87796	5.83171	10.9701	18.9359	39.748	16.0874
2664	ENSECAG00000016605	2.50162	-3.2121	1.28249	-2.50458	0.0122598	0.0439879	0	0	0	1.9439	3.37541	5.68076	4.41645	4.59641
2667	ENSECAG00000004586	4.10424	2.15955	0.86268	2.5033	0.012304	0.0441136	11.1604	6.56825	3.43898	5.83171	1.6877	1.89359	1.10411	1.1491
2668	ENSECAG00000016155	31.4974	1.22127	0.487976	2.50273	0.012324	0.0441687	19.8408	82.9242	30.9508	42.7659	24.4717	28.4038	8.8329	13.7892
2670	ENSECAG00000033419	1.78159	-3.50903	1.40281	-2.50142	0.0123696	0.0442987	0	0	0.859745	0	2.53156	1.89359	5.52056	3.44731
2671	ENSECAG00000021520	10.241	-1.84445	0.737403	-2.50128	0.0123747	0.0443004	1.24005	12.3155	0	3.88781	17.7209	20.8295	12.1452	13.7892
2672	ENSECAG00000011099	2.34475	-3.16935	1.26728	-2.50091	0.0123875	0.0443296	0	0.821032	0.859745	0	3.37541	4.73397	5.52056	3.44731
2674	ENSECAG00000022188	1.30212	-3.89976	1.56107	-2.49813	0.012485	0.0446452	0	0	0	0	4.21926	2.84038	2.20822	1.1491
2676	ENSECAG00000022701	9.07977	-1.37628	0.551236	-2.49671	0.0125352	0.0447776	7.44029	3.28413	6.87796	2.91585	12.6578	17.9891	8.8329	12.6401
2677	ENSECAG00000023398	4.24008	2.22415	0.890815	2.49676	0.0125332	0.0447776	12.4005	4.10516	7.7377	3.88781	1.6877	1.89359	2.20822	0
2678	ENSECAG00000015121	2.99934	-2.78616	1.11608	-2.49638	0.0125468	0.0447993	2.4801	0	0	0.971951	6.75082	4.73397	3.31234	5.74551
2680	ENSECAG00000019958	4.02522	-2.29779	0.921008	-2.49487	0.0126005	0.0449574	0	3.28413	0	1.9439	9.28237	7.57435	5.52056	4.59641
2681	ENSECAG00000016863	7.92551	-1.45839	0.584594	-2.49471	0.0126061	0.0449605	4.96019	4.10516	6.01821	1.9439	16.877	10.4147	11.0411	8.04372
2682	ENSECAG00000013377	3.70673	-2.37979	0.954097	-2.49429	0.0126209	0.0449968	2.4801	1.64206	0.859745	0	10.9701	4.73397	5.52056	3.44731
2683	ENSECAG00000024842	9.79776	-1.53745	0.616719	-2.49296	0.0126684	0.0451492	11.1604	4.10516	2.57923	2.91585	10.9701	19.8827	19.874	6.89462
2684	ENSECAG00000016110	3.41825	-2.57888	1.03509	-2.49145	0.0127224	0.0453247	1.24005	0	0	2.91585	7.59467	6.62756	5.52056	3.44731
2686	ENSECAG00000005039	1.26008	-3.82931	1.53777	-2.49017	0.0127683	0.0454543	0	0	0	0	2.53156	1.89359	2.20822	3.44731
2687	ENSECAG00000017669	1.84511	3.5225	1.41502	2.48936	0.0127972	0.0455404	3.72015	4.92619	4.29872	0.971951	0.843852	0	0	0
2689	ENSECAG00000018772	3.09886	-2.50414	1.00658	-2.48777	0.0128546	0.0457105	0	0.821032	1.71949	0.971951	4.21926	4.73397	7.72879	4.59641
2693	ENSECAG00000014851	11.2999	1.89323	0.762171	2.48399	0.012992	0.0461304	3.72015	12.3155	28.3716	26.2427	0.843852	1.89359	5.52056	11.491
2694	ENSECAG00000019055	1.59328	-4.19437	1.68989	-2.48204	0.0130632	0.046366	0	0	0	0	6.75082	3.78718	2.20822	0
2698	ENSECAG00000022233	5.06469	2.65188	1.06916	2.48034	0.0131256	0.0465188	1.24005	22.1679	6.87796	4.85976	2.53156	2.84038	0	0
2699	ENSECAG00000017017	21.8666	-1.09158	0.440265	-2.47937	0.0131615	0.0466286	19.8408	9.03135	15.4754	11.6634	17.7209	20.8295	29.811	50.5605
2703	ENSECAG00000026951	1.77434	-3.49507	1.4109	-2.4772	0.0132419	0.0468439	0	0	0	0.971951	3.37541	1.89359	2.20822	5.74551
2705	ENSECAG00000020151	22.1312	-1.0062	0.406422	-2.47576	0.0132952	0.0469978	13.6405	21.3468	10.3169	13.6073	32.0664	44.4993	23.1864	18.3856
2706	ENSECAG00000012605	10.8345	-1.30693	0.527982	-2.47532	0.0133115	0.0470379	6.20024	4.92619	3.43898	10.6915	17.7209	17.9891	17.6658	8.04372
2707	ENSECAG00000000397	17.9368	-1.22524	0.49514	-2.47452	0.0133415	0.0470824	17.3607	9.03135	12.0364	4.85976	14.3455	25.5634	43.0604	17.2365
2710	ENSECAG00000019177	2.7825	-2.77202	1.1201	-2.4748	0.0133311	0.0470824	1.24005	0.821032	0.859745	0	5.90697	6.62756	2.20822	4.59641
2712	ENSECAG00000013758	11.4768	2.17047	0.87781	2.4726	0.0134133	0.0472927	42.1617	2.46309	15.4754	15.5512	11.8139	0.946794	1.10411	2.29821
2713	ENSECAG00000014402	17.6199	1.01905	0.412192	2.47227	0.013426	0.0473201	19.8408	24.6309	24.0728	26.2427	12.6578	18.9359	8.8329	5.74551
2714	ENSECAG00000023512	6.00978	1.76147	0.712758	2.47135	0.0134604	0.047424	7.44029	7.38928	16.3351	5.83171	3.37541	0.946794	3.31234	3.44731
2715	ENSECAG00000003502	4.47838	-1.91904	0.776867	-2.47023	0.0135025	0.0475548	1.24005	0.821032	3.43898	1.9439	8.43852	7.57435	6.62467	5.74551
2716	ENSECAG00000013319	17.4164	-1.01911	0.412602	-2.46995	0.0135131	0.0475745	12.4005	12.3155	12.8962	8.74756	32.9102	27.457	17.6658	14.9383
2717	ENSECAG00000042780	11.1848	1.31448	0.532508	2.46848	0.013569	0.0477535	23.5609	9.03135	18.0546	13.6073	10.1262	3.78718	4.41645	6.89462
2718	ENSECAG00000015273	1.92443	3.55417	1.44008	2.46802	0.0135861	0.0477963	2.4801	0.821032	5.15847	5.83171	0	0	1.10411	0
2720	ENSECAG00000029515	7.87187	-1.3895	0.563119	-2.4675	0.0136059	0.0478308	6.20024	3.28413	5.15847	2.91585	10.1262	10.4147	9.93701	14.9383
2721	ENSECAG00000006669	18.4551	1.15085	0.46678	2.4655	0.0136822	0.0480811	28.5211	17.2417	29.2313	26.2427	4.21926	10.4147	9.93701	21.8329
2722	ENSECAG00000020173	15.2128	1.23072	0.499347	2.46466	0.0137143	0.0481765	32.2413	19.7048	20.6339	13.6073	16.877	8.52115	5.52056	4.59641
2727	ENSECAG00000011633	15.6532	-1.03502	0.420547	-2.46114	0.0138497	0.048549	13.6405	13.9575	6.01821	7.77561	22.784	21.7763	23.1864	16.0874
2732	ENSECAG00000009683	1.67909	-4.27119	1.73649	-2.45967	0.0139065	0.0486713	0	0	0	0	7.59467	4.73397	1.10411	0
2733	ENSECAG00000017956	2.54629	3.24099	1.31772	2.45955	0.0139112	0.0486713	7.44029	5.74722	2.57923	2.91585	1.6877	0	0	0
2738	ENSECAG00000023744	4.97961	1.9531	0.794376	2.45867	0.0139454	0.0487288	3.72015	8.21032	7.7377	11.6634	0.843852	0.946794	4.41645	2.29821
2739	ENSECAG00000020174	25.0769	1.58209	0.643735	2.45767	0.0139842	0.0488195	11.1604	66.5036	36.969	35.9622	11.8139	30.2974	3.31234	4.59641
2742	ENSECAG00000010713	15.3147	1.32916	0.541068	2.45654	0.0140282	0.0489195	6.20024	22.9889	26.6521	31.1024	5.06311	5.68076	11.0411	13.7892
2743	ENSECAG00000016722	31.7737	1.13378	0.46175	2.4554	0.014073	0.0490578	24.801	73.8928	28.3716	47.6256	17.7209	35.9782	15.4576	10.3419
2747	ENSECAG00000043788	7.61852	1.52723	0.622699	2.4526	0.0141828	0.0493844	7.44029	15.5996	8.59745	13.6073	3.37541	6.62756	1.10411	4.59641
2748	ENSECAG00000039910	7.16287	-1.80239	0.735072	-2.45199	0.014207	0.0494351	6.20024	3.28413	1.71949	1.9439	5.90697	23.6698	8.8329	5.74551
2750	ENSECAG00000036387	14.656	1.1188	0.456427	2.45121	0.0142379	0.0495151	16.1206	27.9151	23.2131	12.6354	7.59467	8.52115	14.3535	6.89462
2751	ENSECAG00000016710	5.76602	2.31369	0.944206	2.45041	0.0142696	0.0495985	24.801	6.56825	2.57923	4.85976	3.37541	2.84038	1.10411	0
2752	ENSECAG00000008491	1.6856	-3.43969	1.40425	-2.44948	0.0143064	0.0497086	0	0	0	0.971951	4.21926	3.78718	2.20822	2.29821
2754	ENSECAG00000019620	2.74254	-2.82614	1.15392	-2.44917	0.0143185	0.0497145	0	1.64206	0.859745	0	6.75082	4.73397	2.20822	5.74551
2755	ENSECAG00000023477	4.9124	-1.87806	0.76691	-2.44886	0.0143308	0.0497392	1.24005	2.46309	2.57923	1.9439	9.28237	4.73397	4.41645	12.6401
2756	ENSECAG00000010237	10.9815	-1.31281	0.536262	-2.44807	0.0143623	0.0498301	11.1604	4.92619	7.7377	1.9439	18.5647	19.8827	12.1452	11.491
2759	ENSECAG00000002437	14.652	1.09629	0.448076	2.44666	0.0144188	0.0499718	26.041	23.8099	12.0364	18.4671	12.6578	8.52115	9.93701	5.74551

## Sheet: Table S2
Table S2. Results of the identification of DEGs between group I vs IV using DeSeq 2 software.								Group I (5-AZA-dc)				Group IV (TSA)
	gene	baseMean	log2FoldChange	lfcSE	stat	pvalue	padj	a1count	a2count	a3count	a4count	z13count	z14count	z15count	z16count
1	ENSECAG00000038313	3137.53	-4.53795	0.210757	-21.5317	7.86516e-103	7.52774e-99	246.315	199.874	345.818	243.468	4730.35	5369.61	7382.9	6581.91
2	ENSECAG00000020399	349.087	4.04434	0.18893	21.4065	1.16241e-101	5.56269e-98	602.103	642.219	755.136	632.626	31.6746	48.1441	38.9942	41.7969
3	ENSECAG00000015180	1070.41	4.68208	0.223474	20.9514	1.82309e-97	5.81626e-94	1373.39	2246.95	2025.99	2595.04	66.6834	88.0935	76.9052	90.1932
4	ENSECAG00000028889	15619.4	-7.1647	0.391483	-18.3014	8.06278e-75	1.92922e-71	200.286	113.863	299.48	251.29	14046.8	18513	48276.9	43253.2
5	ENSECAG00000001555	612.871	-7.97386	0.454027	-17.5625	4.76912e-69	9.12906e-66	0	7.37241	6.00676	4.88892	798.533	1518.08	1792.65	775.442
6	ENSECAG00000001963	332.063	3.45103	0.197723	17.4538	3.22032e-68	5.13694e-65	460.285	597.165	677.048	699.115	54.1802	58.3876	49.8259	60.4955
7	ENSECAG00000005525	489.135	3.18942	0.185054	17.2351	1.4476e-66	1.97928e-63	837.221	933.838	791.176	963.116	86.6884	72.7284	101.818	126.491
8	ENSECAG00000008539	358.428	5.51448	0.341202	16.1619	9.35921e-59	1.11971e-55	1159.42	548.835	641.865	455.647	12.5031	16.3895	15.1644	17.5987
9	ENSECAG00000014760	801.762	1.9706	0.12575	15.6707	2.39892e-55	2.55112e-52	1185.54	1318.02	1385.85	1219.3	307.577	296.035	354.197	347.574
10	ENSECAG00000025161	468.604	3.34095	0.223769	14.9304	2.09152e-50	2.00179e-47	888.226	715.943	1062.34	744.093	58.3479	78.8744	88.82	112.192
11	ENSECAG00000010336	1200.38	2.55183	0.172916	14.7576	2.74897e-49	2.39186e-46	1555.02	2528.74	1992.53	2126.68	334.25	330.863	341.199	393.77
12	ENSECAG00000003345	5053.66	1.82402	0.124215	14.6844	8.11654e-49	6.47362e-46	7348.39	7745.94	8956.08	7473.2	2011.34	2228.97	2165.26	2500.11
13	ENSECAG00000013913	159.845	2.6388	0.180528	14.6171	2.18574e-48	1.60921e-45	274.927	274.417	274.595	277.69	41.6771	50.1928	34.6615	50.5962
14	ENSECAG00000021968	266.54	-3.52767	0.242924	-14.5217	8.827e-48	6.03452e-45	62.2007	28.6705	47.196	34.2224	517.63	591.046	425.686	425.668
15	ENSECAG00000014841	349.502	-2.86592	0.199797	-14.3442	1.15842e-46	7.39148e-44	75.8848	69.6283	102.115	88.9783	481.787	570.559	694.313	712.747
16	ENSECAG00000016927	797.235	3.83201	0.267892	14.3043	2.05684e-46	1.23038e-43	2033.96	849.465	1560.04	1515.56	90.8561	97.3126	90.9864	139.69
17	ENSECAG00000024371	258.681	2.39156	0.16836	14.205	8.52808e-46	4.80131e-43	439.137	486.579	419.615	394.047	95.8573	90.1422	72.5725	71.4946
18	ENSECAG00000000477	158.732	3.21004	0.226147	14.1945	9.9119e-46	5.27038e-43	269.951	341.588	272.879	262.046	37.5094	23.5599	23.8298	38.4971
19	ENSECAG00000010051	111.164	3.76051	0.26651	14.1102	3.28727e-45	1.65592e-42	225.166	169.565	237.696	195.557	14.1702	14.3408	11.9149	20.8984
20	ENSECAG00000019861	4893.06	2.11453	0.151107	13.9936	1.70587e-44	8.16346e-42	7054.8	7145.5	8954.37	8644.58	1517.88	1916.55	2094.85	1815.96
21	ENSECAG00000018235	125.644	2.77105	0.20122	13.7712	3.79797e-43	1.73097e-40	216.458	240.832	202.514	216.09	27.5069	29.706	35.7447	36.2973
22	ENSECAG00000000725	196.916	2.43693	0.17724	13.7493	5.14053e-43	2.23636e-40	359.52	338.312	284.034	347.113	51.6796	60.4363	68.2398	65.9951
23	ENSECAG00000033446	83.6609	-4.45373	0.335034	-13.2934	2.52861e-40	1.05223e-37	4.97605	8.19156	9.4392	5.8667	160.874	123.946	166.808	189.186
24	ENSECAG00000016973	199.177	2.07235	0.156292	13.2595	3.97771e-40	1.58628e-37	309.759	312.918	316.642	348.091	78.3529	75.8014	67.1566	84.6937
25	ENSECAG00000002142	187.395	3.30305	0.259162	12.7451	3.31825e-37	1.27036e-34	272.439	425.961	307.203	354.935	24.1727	52.2415	31.412	30.7977
26	ENSECAG00000020305	704.103	1.72598	0.135824	12.7074	5.3782e-37	1.9798e-34	1226.6	1070.64	926.758	1101.96	330.916	297.06	340.116	338.775
27	ENSECAG00000020532	657.612	1.48644	0.117327	12.6693	8.75446e-37	3.1033e-34	945.45	1069.82	890.717	970.939	343.419	361.593	335.783	343.174
28	ENSECAG00000016339	130.12	-2.59736	0.205467	-12.6412	1.25097e-36	4.27607e-34	39.8084	33.5854	36.8987	38.1335	270.068	208.966	217.717	195.785
29	ENSECAG00000012792	318.453	2.40479	0.190389	12.6309	1.42554e-36	4.70477e-34	487.653	508.696	612.69	532.892	80.02	130.092	84.4874	111.092
30	ENSECAG00000018455	1424.47	2.14309	0.169724	12.6269	1.50055e-36	4.78726e-34	2240.47	1988.09	2831.76	2230.32	414.27	597.192	549.168	544.459
31	ENSECAG00000006881	3531.44	2.11743	0.170649	12.4081	2.36044e-35	7.28766e-33	6490.02	5586.65	6270.2	4612.2	1039.43	1504.76	1451.45	1296.8
32	ENSECAG00000019193	95.9833	-4.74194	0.383496	-12.365	4.04101e-35	1.20864e-32	1.24401	14.7448	5.14865	4.88892	143.369	213.063	185.222	200.185
33	ENSECAG00000022254	1036.18	3.0843	0.250041	12.3352	5.85493e-35	1.69811e-32	1179.32	2585.26	1470.8	2179.48	221.722	205.893	188.472	258.481
34	ENSECAG00000017419	258.635	2.12022	0.172138	12.3169	7.34241e-35	2.06689e-32	442.869	466.1	352.683	419.469	80.8536	95.2639	99.6518	112.192
35	ENSECAG00000020731	295.137	4.45758	0.362781	12.2872	1.06056e-34	2.90017e-32	553.586	315.375	883.852	504.536	13.3367	20.4869	30.3288	39.597
36	ENSECAG00000010468	438.465	-2.31053	0.188728	-12.2426	1.83991e-34	4.89162e-32	125.645	140.076	159.608	162.312	711.845	886.057	777.717	544.459
37	ENSECAG00000037526	345.487	-1.8132	0.148588	-12.2029	3.00089e-34	7.76256e-32	150.526	165.47	144.162	151.556	477.62	624.849	543.752	505.962
38	ENSECAG00000011347	218.66	2.06447	0.170732	12.0919	1.1656e-33	2.93579e-31	308.515	322.748	382.717	396.98	78.3529	78.8744	96.4022	84.6937
39	ENSECAG00000018435	528.36	2.22275	0.185344	11.9926	3.88639e-33	9.53761e-31	695.404	1096.03	823.784	864.36	155.872	189.504	184.139	217.784
40	ENSECAG00000028292	1732.05	-3.17974	0.267237	-11.8986	1.20373e-32	2.88023e-30	534.926	366.982	243.703	233.69	2615.65	2786.21	3950.33	3124.87
41	ENSECAG00000015128	328.866	2.20507	0.187341	11.7703	5.54968e-32	1.29551e-29	519.998	495.59	612.69	532.892	95.8573	145.457	93.1527	135.29
42	ENSECAG00000018309	237.911	2.14137	0.182701	11.7207	9.98911e-32	2.27633e-29	487.653	355.514	349.25	359.824	90.8561	78.8744	82.321	98.9926
43	ENSECAG00000017157	111.53	-3.40439	0.291636	-11.6734	1.74275e-31	3.87905e-29	24.8803	23.7555	7.72298	21.5112	192.548	178.236	192.804	250.781
44	ENSECAG00000012231	865.504	1.58832	0.136115	11.6689	1.83712e-31	3.90735e-29	1193.01	1511.34	1162.74	1328.81	446.778	440.468	391.025	449.866
45	ENSECAG00000017249	210.065	2.62197	0.224663	11.6707	1.80041e-31	3.90735e-29	313.491	309.641	494.271	328.535	67.5169	48.1441	62.8239	56.0958
46	ENSECAG00000000857	123.527	3.42597	0.295183	11.6063	3.83036e-31	7.96964e-29	281.147	226.087	208.52	187.734	11.6696	34.8277	17.3307	20.8984
47	ENSECAG00000023911	405.313	-1.62154	0.139913	-11.5896	4.65266e-31	9.47461e-29	201.53	175.299	221.392	197.512	622.656	614.606	666.15	543.359
48	ENSECAG00000020669	2308.14	1.34455	0.116416	11.5495	7.42844e-31	1.4812e-28	3388.69	3198.81	3363.79	3295.13	1120.28	1294.77	1355.05	1448.59
49	ENSECAG00000011829	1712.93	2.97748	0.258122	11.5351	8.7736e-31	1.71372e-28	4010.7	1932.39	3441.87	2773.97	322.581	277.597	461.431	482.864
50	ENSECAG00000011735	4435.37	1.12829	0.0989571	11.4018	4.094e-30	7.83673e-28	6631.84	5840.58	6209.28	5664.3	2673.17	2770.85	2858.49	2834.49
51	ENSECAG00000013276	191.029	-2.058	0.180753	-11.3857	4.92549e-30	9.2435e-28	85.8369	67.1708	72.9393	71.3782	345.92	249.94	330.367	304.677
52	ENSECAG00000009763	162.999	-1.95563	0.172939	-11.3082	1.19452e-29	2.19861e-27	80.8609	64.7133	65.2163	57.6892	246.728	241.745	259.961	287.078
53	ENSECAG00000013582	95.8758	3.50889	0.310713	11.293	1.42061e-29	2.56541e-27	115.693	183.491	234.264	172.09	20.8385	13.3165	11.9149	15.3988
54	ENSECAG00000017376	244.782	-1.5045	0.133818	-11.2428	2.51187e-29	4.45206e-27	120.669	123.693	128.716	136.89	364.258	346.228	371.528	366.273
55	ENSECAG00000003121	1492.67	1.497	0.133805	11.1879	4.67342e-29	7.98737e-27	2088.7	2115.06	2391.55	2220.55	716.846	672.994	854.622	881.034
56	ENSECAG00000006877	925.287	-1.47623	0.131945	-11.1882	4.65684e-29	7.98737e-27	424.209	571.771	471.102	487.914	1439.53	1407.45	1272.73	1327.6
57	ENSECAG00000020753	88.145	4.01175	0.3587	11.1841	4.87655e-29	8.18833e-27	100.765	199.874	167.331	195.557	7.50188	13.3165	5.41586	15.3988
58	ENSECAG00000016064	61.974	3.24654	0.292134	11.1132	1.08235e-28	1.78606e-26	102.009	107.309	127	111.467	7.50188	14.3408	15.1644	10.9992
59	ENSECAG00000024053	231.903	-1.86983	0.170411	-10.9725	5.181e-28	8.40464e-26	88.325	120.416	94.392	93.8672	353.422	316.522	379.11	409.169
60	ENSECAG00000008134	324.347	2.07996	0.189689	10.9651	5.62326e-28	8.97003e-26	476.457	466.919	652.163	501.603	103.359	116.775	121.315	156.188
61	ENSECAG00000008678	1738.1	-1.69068	0.154377	-10.9516	6.52572e-28	1.0239e-25	920.57	900.253	762.859	705.959	2927.4	2174.68	2898.57	2614.5
62	ENSECAG00000017863	145.351	3.62513	0.333328	10.8756	1.50723e-27	2.32672e-25	207.75	208.885	373.277	284.535	10.836	17.4138	24.9129	35.1974
63	ENSECAG00000013583	256.591	-2.46421	0.227652	-10.8245	2.63588e-27	4.00444e-25	74.6408	72.0858	91.8176	76.2671	561.807	297.06	484.178	394.87
64	ENSECAG00000017191	103.581	-6.14942	0.571386	-10.7623	5.18643e-27	7.75614e-25	3.73204	3.27663	0.858109	3.91113	115.029	388.226	133.23	180.386
65	ENSECAG00000011541	223.431	-2.02007	0.187742	-10.7598	5.32653e-27	7.84311e-25	113.205	72.0858	87.5271	83.1116	407.602	376.958	342.282	304.677
66	ENSECAG00000013425	287.997	1.68305	0.15705	10.7166	8.50498e-27	1.23335e-24	450.333	394.833	442.784	469.336	145.036	121.897	118.066	161.688
67	ENSECAG00000007972	216.463	3.43254	0.320903	10.6965	1.05693e-26	1.50983e-24	240.095	588.154	303.771	452.714	32.5081	53.2659	25.9961	35.1974
68	ENSECAG00000013359	92.0646	2.68733	0.251926	10.6671	1.4503e-26	2.0413e-24	165.454	137.618	166.473	167.201	20.005	16.3895	27.0793	36.2973
69	ENSECAG00000024764	57.7021	-5.73983	0.538322	-10.6625	1.52517e-26	2.11557e-24	0	2.45747	2.57433	2.93335	131.7	86.0448	108.317	127.59
70	ENSECAG00000014009	1684.61	2.64956	0.248735	10.6521	1.70456e-26	2.33062e-24	2434.53	2682.74	3095.2	3410.51	258.398	635.093	484.178	476.264
71	ENSECAG00000012512	703.938	-1.27268	0.119799	-10.6235	2.31703e-26	3.12342e-24	435.405	427.6	413.608	372.535	1061.93	915.763	956.44	1048.22
72	ENSECAG00000033359	99.0024	-4.40011	0.415298	-10.5951	3.1409e-26	4.17521e-24	4.97605	4.91494	13.7297	11.7334	90.8561	223.307	191.721	250.781
73	ENSECAG00000011816	346.355	1.82778	0.172787	10.5782	3.75931e-26	4.92882e-24	583.442	520.983	580.94	475.203	115.029	173.114	151.644	170.487
74	ENSECAG00000019073	229.381	-1.69571	0.160592	-10.5591	4.6085e-26	5.96054e-24	124.401	110.586	100.399	98.7561	354.255	396.421	344.448	305.777
75	ENSECAG00000014780	224.1	2.62937	0.250536	10.495	9.10724e-26	1.14691e-23	528.706	249.024	413.608	352.98	73.3517	59.4119	56.3249	59.3955
76	ENSECAG00000021781	149.367	1.97811	0.188476	10.4952	9.08436e-26	1.14691e-23	236.363	266.226	251.426	199.468	65.8498	68.631	53.0754	53.896
77	ENSECAG00000016613	263.16	1.57855	0.150674	10.4765	1.10729e-25	1.37635e-23	355.788	399.748	416.183	404.802	134.2	109.605	137.563	147.389
78	ENSECAG00000020519	78.672	2.61215	0.249943	10.451	1.45062e-25	1.77999e-23	129.377	134.342	134.723	141.779	19.1715	16.3895	19.4971	34.0974
79	ENSECAG00000024636	67.6704	-5.43843	0.52242	-10.4101	2.23055e-25	2.70235e-23	1.24401	4.91494	1.71622	3.91113	130.866	206.917	115.899	75.8943
80	ENSECAG00000008303	429.711	1.68411	0.162124	10.3878	2.81746e-25	3.37074e-23	778.753	584.058	605.825	655.115	239.227	187.455	207.969	179.287
81	ENSECAG00000041291	90.6834	2.21419	0.214324	10.331	5.10037e-25	6.02662e-23	146.794	138.437	164.757	147.645	39.1765	28.6816	33.5783	26.398
82	ENSECAG00000018674	2191.33	2.34847	0.228194	10.2916	7.69255e-25	8.97871e-23	2801.52	3089.04	4493.92	4269	711.011	959.81	513.423	692.948
83	ENSECAG00000031030	256.755	-1.52159	0.14875	-10.2292	1.46737e-24	1.69208e-22	134.353	121.235	153.601	121.245	360.09	415.883	375.86	371.772
84	ENSECAG00000015379	78.8075	3.2024	0.313773	10.2061	1.86157e-24	2.12109e-22	89.569	144.991	157.892	176.001	15.0038	14.3408	21.6634	10.9992
85	ENSECAG00000000514	79.9744	-4.33627	0.42759	-10.1412	3.62609e-24	4.08297e-22	3.73204	4.09578	11.1554	10.7556	101.692	99.3613	224.216	184.786
86	ENSECAG00000020963	327.133	-1.45751	0.143837	-10.1331	3.93984e-24	4.38468e-22	190.334	191.683	155.318	162.312	531.8	476.32	448.433	460.865
87	ENSECAG00000014771	658.387	2.14342	0.211714	10.1241	4.31843e-24	4.75077e-22	1290.04	1087.02	997.981	921.072	270.068	318.571	170.058	212.284
88	ENSECAG00000007824	462.869	-1.71648	0.169913	-10.1021	5.40674e-24	5.88044e-22	242.583	219.534	217.102	185.779	789.364	826.645	644.487	577.457
89	ENSECAG00000019642	170.513	-1.5817	0.157839	-10.021	1.23265e-23	1.32558e-21	83.3489	86.8306	91.8176	79.2004	265.9	245.842	232.882	278.279
90	ENSECAG00000017064	135.85	1.84145	0.184249	9.99438	1.61297e-23	1.71531e-21	250.047	190.863	213.669	195.557	60.015	53.2659	58.4913	64.8951
91	ENSECAG00000022186	50.0441	-5.21607	0.524065	-9.9531	2.44449e-23	2.57101e-21	3.73204	1.63831	4.29054	0.977783	89.189	62.4849	112.65	125.391
92	ENSECAG00000037409	256.981	-1.52465	0.153414	-9.93813	2.8411e-23	2.95567e-21	133.109	133.522	133.007	130.045	325.081	359.545	420.27	421.268
93	ENSECAG00000040088	380.187	1.51947	0.153753	9.88257	4.95435e-23	5.09872e-21	569.758	540.643	594.669	548.536	163.374	203.844	180.89	239.782
94	ENSECAG00000020587	328.364	-2.59232	0.262867	-9.86172	6.09963e-23	6.21059e-21	113.205	54.8835	125.284	81.156	526.799	425.102	686.731	613.754
95	ENSECAG00000029533	71.6088	-4.14859	0.421577	-9.84064	7.5229e-23	7.57913e-21	13.6841	1.63831	7.72298	8.80005	112.528	87.0692	184.139	157.288
96	ENSECAG00000019588	53.5562	4.34006	0.444343	9.76735	1.55466e-22	1.54996e-20	77.1288	77.8198	150.169	102.667	3.33417	2.04869	7.5822	7.69942
97	ENSECAG00000009068	358.634	1.36636	0.140019	9.75839	1.69832e-22	1.67573e-20	473.969	548.016	512.291	531.914	187.547	197.698	235.048	182.586
98	ENSECAG00000017265	399.173	1.6578	0.169912	9.75684	1.72445e-22	1.68415e-20	546.122	546.377	755.994	575.914	195.882	170.041	181.973	221.083
99	ENSECAG00000008767	181.421	-1.95291	0.200208	-9.75441	1.76633e-22	1.70763e-20	53.4926	68.8091	84.0947	89.9561	249.229	272.475	300.038	333.275
100	ENSECAG00000020616	382.021	-1.38494	0.142256	-9.73559	2.12583e-22	2.03463e-20	194.066	249.024	212.811	188.712	566.809	578.754	557.833	508.162
101	ENSECAG00000022423	146.564	4.88461	0.505157	9.66949	4.06414e-22	3.85128e-20	536.17	94.203	332.946	171.112	13.3367	6.14606	6.49903	12.0991
102	ENSECAG00000020674	268.264	-1.73985	0.180202	-9.65504	4.67959e-22	4.39102e-20	155.502	108.948	126.142	105.601	364.258	478.368	430.019	377.272
103	ENSECAG00000017458	135.829	3.26049	0.338417	9.63455	5.71422e-22	5.30979e-20	243.827	402.206	166.473	172.09	35.8423	22.5356	21.6634	21.9984
104	ENSECAG00000009648	329.841	2.03874	0.212532	9.59263	8.58686e-22	7.90238e-20	701.624	435.791	430.771	555.381	154.205	106.532	120.232	134.19
105	ENSECAG00000019691	846.195	2.40898	0.251515	9.57789	9.90493e-22	9.02858e-20	924.302	1655.51	1319.77	1796.19	184.213	351.35	261.044	277.179
106	ENSECAG00000012469	639.926	-1.37216	0.144938	-9.46717	2.87519e-21	2.59608e-19	432.917	350.599	338.953	306.046	871.885	866.594	992.185	960.228
107	ENSECAG00000024471	65.365	2.72684	0.289019	9.43479	3.9176e-21	3.50424e-19	106.985	145.81	119.277	82.1338	17.5044	17.4138	19.4971	14.2989
108	ENSECAG00000006670	358.499	1.99865	0.213158	9.37635	6.82956e-21	6.05238e-19	757.604	480.026	538.034	518.225	113.362	183.357	128.897	148.489
109	ENSECAG00000015725	427.03	-1.11972	0.119783	-9.34791	8.94005e-21	7.85002e-19	242.583	273.598	285.75	272.802	560.974	582.851	577.33	620.354
110	ENSECAG00000008583	142.06	1.79846	0.193986	9.27107	1.84286e-20	1.60346e-18	210.238	262.949	193.074	216.09	59.1815	74.7771	53.0754	67.095
111	ENSECAG00000002087	697.393	-1.12633	0.121914	-9.23873	2.49432e-20	2.15074e-18	435.405	431.695	441.068	444.891	986.914	987.467	1032.26	819.439
112	ENSECAG00000040181	130.305	-1.74263	0.189246	-9.20828	3.31379e-20	2.83181e-18	70.9088	54.0643	60.9257	54.7559	166.708	217.161	216.634	201.285
113	ENSECAG00000003271	104.167	1.83426	0.201288	9.11262	8.04187e-20	6.81139e-18	166.698	145.81	159.608	177.957	37.5094	41.9981	47.6595	56.0958
114	ENSECAG00000010132	208.351	2.8644	0.314702	9.10195	8.87207e-20	7.44864e-18	199.042	571.771	303.771	391.113	56.6809	60.4363	45.4932	38.4971
115	ENSECAG00000013979	60.2636	2.2396	0.246655	9.0799	1.08678e-19	9.04485e-18	109.473	94.203	102.115	91.9116	20.005	16.3895	24.9129	23.0983
116	ENSECAG00000012670	4532.59	-1.59792	0.176871	-9.0344	1.64907e-19	1.36063e-17	1884.68	3048.9	2042.3	2025.97	6320.75	6450.29	7061.19	7426.64
117	ENSECAG00000006844	4939.81	2.27608	0.251998	9.03212	1.68371e-19	1.37733e-17	5923.99	9611.98	7702.38	9515.79	1014.42	1806.94	1649.67	2293.33
118	ENSECAG00000012876	68.9875	2.69725	0.300951	8.96243	3.17609e-19	2.57613e-17	154.258	107.309	96.1082	120.267	15.8373	14.3408	14.0812	29.6978
119	ENSECAG00000011560	210.633	2.2409	0.250544	8.94414	3.74866e-19	3.015e-17	243.827	503.781	287.466	354.935	62.5156	82.9718	72.5725	76.9942
120	ENSECAG00000009585	52.7671	2.45959	0.275063	8.94193	3.82431e-19	3.05021e-17	80.8609	100.756	90.1014	85.0671	15.8373	11.2678	16.2476	21.9984
121	ENSECAG00000007530	75.1774	2.72191	0.305772	8.90176	5.49692e-19	4.2861e-17	126.889	95.0221	158.75	140.801	14.1702	12.2921	25.9961	27.4979
122	ENSECAG00000017837	41.0303	-4.12517	0.463423	-8.90153	5.5082e-19	4.2861e-17	1.24401	6.55325	1.71622	7.82227	108.36	59.4119	61.7408	81.3939
123	ENSECAG00000037332	90.4458	2.91608	0.327529	8.90326	5.42319e-19	4.2861e-17	102.009	254.758	131.291	150.579	21.6721	17.4138	22.7466	23.0983
124	ENSECAG00000020252	1156.43	1.17989	0.132601	8.89802	5.68501e-19	4.388e-17	1444.3	1725.14	1604.66	1642.68	650.996	710.894	643.404	829.338
125	ENSECAG00000008730	248.264	1.46115	0.164496	8.88261	6.53109e-19	5.00073e-17	327.176	392.376	351.825	385.247	135.034	120.873	161.393	112.192
126	ENSECAG00000020507	160.599	-1.60758	0.181028	-8.88028	6.6691e-19	5.06587e-17	69.6648	91.7455	78.0879	77.2449	288.406	236.623	229.632	213.384
127	ENSECAG00000018248	1333.92	3.07891	0.346967	8.87378	7.07031e-19	5.32835e-17	4517.01	1350.79	2343.5	1330.76	237.559	301.157	291.373	299.178
128	ENSECAG00000023317	73.1533	2.17066	0.244661	8.87208	7.17939e-19	5.36827e-17	123.157	94.203	131.291	130.045	23.3392	30.7303	21.6634	30.7977
129	ENSECAG00000010004	72.5495	1.9918	0.224986	8.85303	8.51775e-19	6.27103e-17	111.961	120.416	107.264	124.178	30.8411	25.6086	23.8298	36.2973
130	ENSECAG00000013759	107.708	2.58188	0.291627	8.85338	8.49111e-19	6.27103e-17	279.903	120.416	181.919	156.445	30.0075	30.7303	29.2456	32.9975
131	ENSECAG00000008439	711.979	1.49928	0.169489	8.84587	9.08191e-19	6.63534e-17	933.01	1208.26	1022.01	1043.29	320.08	475.295	366.112	327.775
132	ENSECAG00000010355	156.943	-1.47716	0.16704	-8.84319	9.30201e-19	6.74466e-17	80.8609	72.0858	84.0947	94.845	213.387	219.209	252.379	238.682
133	ENSECAG00000014821	437.303	-1.30647	0.148545	-8.7951	1.42927e-18	1.02853e-16	271.195	230.183	255.716	251.29	637.66	641.239	702.978	508.162
134	ENSECAG00000001129	694.37	-1.91025	0.217671	-8.77586	1.6961e-18	1.21145e-16	262.487	237.555	360.406	306.046	751.855	1034.59	1305.22	1296.8
135	ENSECAG00000000216	376.273	2.49653	0.284596	8.77217	1.75256e-18	1.2425e-16	396.84	738.879	713.947	705.959	69.184	105.507	110.483	169.387
136	ENSECAG00000010849	253.037	-1.15205	0.1315	-8.76079	1.93882e-18	1.36445e-16	160.478	153.182	162.183	152.534	345.086	348.277	374.777	327.775
137	ENSECAG00000006963	76.6887	2.54759	0.29156	8.73778	2.37744e-18	1.66091e-16	87.081	135.98	173.338	127.112	23.3392	15.3652	25.9961	25.2981
138	ENSECAG00000015920	630.098	1.06884	0.122483	8.72643	2.62847e-18	1.82297e-16	816.073	926.466	762.001	908.361	399.267	388.226	423.52	416.869
139	ENSECAG00000008484	175.239	2.61629	0.300015	8.72053	2.76911e-18	1.9067e-16	191.578	403.025	293.473	316.802	38.3429	77.8501	35.7447	45.0966
140	ENSECAG00000021583	41.216	3.80844	0.436763	8.7197	2.78941e-18	1.90696e-16	49.7605	94.203	60.9257	102.667	5.00125	5.12172	3.24951	8.79934
141	ENSECAG00000008559	161.958	-2.04142	0.234278	-8.71369	2.94152e-18	1.99669e-16	47.2725	57.3409	70.3649	77.2449	239.227	190.528	289.207	324.476
142	ENSECAG00000009487	531.315	-1.2294	0.141152	-8.70976	3.0451e-18	2.05244e-16	337.128	326.843	344.102	263.024	792.698	710.894	799.38	676.449
143	ENSECAG00000018253	321.981	1.35477	0.156018	8.68338	3.84169e-18	2.57124e-16	492.629	422.685	459.946	476.18	170.043	148.53	215.551	190.286
144	ENSECAG00000010081	337.846	-1.13258	0.130487	-8.67961	3.97132e-18	2.63955e-16	191.578	227.725	211.953	214.135	476.786	477.344	484.178	419.069
145	ENSECAG00000021999	225.173	1.34695	0.155253	8.67583	4.10532e-18	2.70979e-16	320.956	356.333	305.487	309.957	126.698	113.702	150.561	117.691
146	ENSECAG00000012829	557.159	1.3037	0.150405	8.66788	4.40237e-18	2.88597e-16	868.322	836.359	719.095	748.982	310.911	387.202	275.126	311.277
147	ENSECAG00000023416	69.3513	-3.54028	0.408596	-8.6645	4.53486e-18	2.9526e-16	16.1722	9.82988	5.14865	13.689	143.369	147.505	57.4081	161.688
148	ENSECAG00000023388	68.0308	2.36164	0.274326	8.60888	7.3777e-18	4.77108e-16	108.229	85.1923	145.879	116.356	24.1727	16.3895	23.8298	24.1982
149	ENSECAG00000020975	219.594	1.88291	0.21884	8.60405	7.69491e-18	4.94281e-16	253.779	343.226	404.169	380.358	100.025	66.5823	95.3191	113.292
150	ENSECAG00000021658	1158.12	1.20813	0.14055	8.59572	8.27469e-18	5.2798e-16	1592.34	1884.06	1518.85	1469.61	605.985	771.331	741.972	680.849
151	ENSECAG00000024648	31.233	3.68827	0.429478	8.5878	8.86504e-18	5.61903e-16	62.2007	58.9793	47.196	63.5559	5.00125	2.04869	7.5822	3.29975
152	ENSECAG00000004005	65.4625	2.3859	0.278055	8.58069	9.4302e-18	5.93793e-16	116.937	140.076	82.3784	100.712	25.0063	21.5112	20.5803	16.4988
153	ENSECAG00000000036	406.937	1.48662	0.173367	8.575	9.90878e-18	6.17462e-16	608.323	500.504	695.926	594.492	220.889	169.017	214.468	251.881
154	ENSECAG00000022215	178.624	-1.32482	0.154503	-8.57469	9.93513e-18	6.17462e-16	108.229	102.395	102.973	94.845	277.569	271.451	235.048	236.482
155	ENSECAG00000032801	170.84	-1.58534	0.184902	-8.57393	1.00013e-17	6.17562e-16	94.545	89.288	73.7974	85.0671	303.409	223.307	275.126	222.183
156	ENSECAG00000023141	1052.37	1.38037	0.161334	8.55593	1.16918e-17	7.17322e-16	1577.41	1674.36	1192.77	1637.79	553.472	591.046	510.174	681.949
157	ENSECAG00000017123	858.97	1.3117	0.153356	8.55331	1.19605e-17	7.29136e-16	1129.56	1430.25	1185.91	1150.85	403.434	540.853	479.845	551.059
158	ENSECAG00000017058	126.363	-1.73835	0.203552	-8.54006	1.34153e-17	8.12642e-16	62.2007	49.1494	64.3582	57.6892	160.874	236.623	178.723	201.285
159	ENSECAG00000024265	500.557	1.72439	0.202714	8.50652	1.79226e-17	1.07885e-15	571.002	876.497	857.251	767.56	176.711	238.672	226.383	290.378
160	ENSECAG00000018250	165.428	-1.42538	0.167599	-8.50472	1.82037e-17	1.08892e-15	82.1049	86.0114	102.115	88.0005	229.224	255.061	268.626	212.284
161	ENSECAG00000017520	30.5096	4.25087	0.501492	8.47643	2.32203e-17	1.38038e-15	63.4447	47.5111	62.6419	57.6892	0.833542	1.02434	4.33269	6.59951
162	ENSECAG00000022375	283.604	-1.26347	0.14923	-8.46659	2.52678e-17	1.49283e-15	171.674	172.842	157.892	165.245	409.269	459.93	392.108	339.875
163	ENSECAG00000016917	360.459	-1.40067	0.166383	-8.41834	3.81844e-17	2.2421e-15	153.014	209.704	219.676	207.29	460.949	482.466	565.415	585.156
164	ENSECAG00000009904	383.795	1.28914	0.153338	8.40718	4.19984e-17	2.45102e-15	465.261	497.228	574.933	640.448	205.051	236.623	223.133	227.683
165	ENSECAG00000020699	1197.47	-1.18713	0.141265	-8.40355	4.3319e-17	2.51277e-15	886.982	681.538	670.183	687.382	1723.76	1464.81	1756.9	1708.17
166	ENSECAG00000006481	161.282	2.02139	0.242259	8.34391	7.18737e-17	4.144e-15	162.966	295.715	318.358	257.157	54.1802	68.631	60.6576	72.5946
167	ENSECAG00000020589	198.77	-1.7525	0.210134	-8.33992	7.43413e-17	4.2606e-15	58.4686	89.288	112.412	101.689	287.572	267.354	341.199	332.175
168	ENSECAG00000018254	2763.37	-1.21061	0.145573	-8.31614	9.08735e-17	5.17708e-15	1669.47	1647.32	1738.53	1614.32	3731.77	3045.37	4161.54	4498.66
169	ENSECAG00000042533	153.531	1.35273	0.162756	8.31136	9.46082e-17	5.35796e-15	207.75	253.119	210.237	211.201	88.3554	82.9718	88.82	85.7936
170	ENSECAG00000021923	210.361	-1.20545	0.14521	-8.30143	1.0287e-16	5.79157e-15	134.353	130.246	123.568	121.245	282.571	329.839	277.292	283.779
171	ENSECAG00000010560	126.695	-3.95454	0.477318	-8.28492	1.18192e-16	6.61531e-15	33.5884	5.73409	12.0135	11.7334	405.101	113.702	179.806	251.881
172	ENSECAG00000009258	80.281	-1.93455	0.233751	-8.27613	1.2724e-16	7.08034e-15	29.8563	46.6919	29.1757	26.4001	121.697	118.824	134.313	135.29
173	ENSECAG00000017061	28.4684	-3.54876	0.429265	-8.26705	1.37311e-16	7.59656e-15	3.73204	5.73409	4.29054	3.91113	55.0138	46.0955	66.0734	42.8968
174	ENSECAG00000016440	116.907	-1.7142	0.208588	-8.21812	2.0671e-16	1.13703e-14	41.0524	53.2452	66.0744	56.7114	180.879	149.554	176.557	211.184
175	ENSECAG00000022164	296.266	3.1684	0.38693	8.18856	2.6436e-16	1.44582e-14	253.779	906.806	410.176	562.225	60.015	96.2883	35.7447	45.0966
176	ENSECAG00000014207	298.22	2.20169	0.269263	8.17672	2.91684e-16	1.5862e-14	717.796	364.525	519.156	357.869	80.8536	92.1909	116.983	136.39
177	ENSECAG00000019829	283.17	-1.17157	0.143385	-8.1708	3.06342e-16	1.65649e-14	192.822	171.204	175.912	157.423	383.429	401.543	434.352	348.674
178	ENSECAG00000014563	229.543	-1.14153	0.13982	-8.1643	3.23302e-16	1.73839e-14	153.014	144.172	135.581	140.801	326.748	286.816	339.033	310.177
179	ENSECAG00000017659	87.5732	-1.64273	0.202128	-8.12716	4.39461e-16	2.34977e-14	46.0285	39.3195	42.0473	43.0225	125.865	146.481	113.733	144.089
180	ENSECAG00000040270	205.663	-1.56474	0.192597	-8.12444	4.49435e-16	2.38975e-14	140.574	100.756	96.1082	80.1782	300.909	307.303	341.199	278.279
181	ENSECAG00000013108	118.885	2.21117	0.272535	8.11332	4.92559e-16	2.60458e-14	125.645	185.129	213.669	258.135	55.0138	34.8277	34.6615	43.9967
182	ENSECAG00000014459	237.398	-1.61135	0.198711	-8.10902	5.10296e-16	2.68354e-14	110.717	119.597	98.6825	139.823	440.944	388.226	314.12	287.078
183	ENSECAG00000002810	33.5352	-2.99398	0.369852	-8.09507	5.72333e-16	2.99333e-14	2.48803	10.649	6.00676	9.77783	50.0125	59.4119	61.7408	68.1949
184	ENSECAG00000007589	127.241	2.73708	0.338414	8.08797	6.06696e-16	3.15581e-14	200.286	148.267	324.365	211.201	15.0038	34.8277	46.5764	37.3972
185	ENSECAG00000009501	154.727	1.96562	0.243347	8.07741	6.61549e-16	3.42253e-14	322.2	235.098	269.446	159.379	70.8511	56.3389	57.4081	67.095
186	ENSECAG00000017912	54.4253	2.69264	0.333701	8.06901	7.08731e-16	3.64692e-14	58.4686	110.586	112.412	94.845	10.836	14.3408	11.9149	21.9984
187	ENSECAG00000012252	49.9013	2.29609	0.284936	8.05824	7.74036e-16	3.96166e-14	68.4207	101.575	75.5136	86.0449	17.5044	18.4382	11.9149	19.7985
188	ENSECAG00000021359	508.366	-1.06921	0.133193	-8.02753	9.94563e-16	5.06328e-14	291.099	325.205	382.717	311.913	691.006	736.503	654.235	674.249
189	ENSECAG00000018986	460.951	1.2713	0.158443	8.02371	1.026e-15	5.19569e-14	671.767	583.239	686.487	664.893	235.892	230.477	284.874	329.975
190	ENSECAG00000009054	49.9496	-8.41715	1.0508	-8.01025	1.14473e-15	5.76642e-14	0	0.819156	0	0	90.8561	130.092	94.2359	83.5937
191	ENSECAG00000020917	45.1962	2.24947	0.281621	7.98757	1.37623e-15	6.8963e-14	79.6169	79.4582	62.6419	77.2449	16.6708	14.3408	19.4971	12.0991
192	ENSECAG00000002115	274.86	-1.0396	0.130178	-7.98599	1.39394e-15	6.94867e-14	170.43	183.491	182.777	181.868	346.753	379.007	355.28	399.27
193	ENSECAG00000017891	76.8402	2.03459	0.255035	7.97769	1.49095e-15	7.3937e-14	99.5211	138.437	110.696	145.69	35.8423	27.6573	20.5803	36.2973
194	ENSECAG00000008826	87.4361	2.19275	0.274935	7.97552	1.51735e-15	7.48586e-14	189.09	108.948	150.169	127.112	44.1777	28.6816	24.9129	26.398
195	ENSECAG00000007410	98.184	-1.79167	0.225055	-7.961	1.70654e-15	8.37606e-14	34.8324	49.9685	36.0406	54.7559	183.379	139.311	135.396	151.789
196	ENSECAG00000024623	263.745	1.11188	0.140281	7.92611	2.2612e-15	1.10418e-13	347.08	397.291	362.122	336.357	185.046	155.7	162.476	163.888
197	ENSECAG00000000398	119.288	-2.37375	0.299748	-7.91915	2.39146e-15	1.16186e-13	59.7127	22.9364	40.3311	33.2446	250.896	221.258	190.638	135.29
198	ENSECAG00000023374	50.8762	2.37936	0.30069	7.91299	2.51283e-15	1.21466e-13	90.813	105.671	66.9325	78.2227	16.6708	22.5356	15.1644	10.9992
199	ENSECAG00000023851	237.297	1.25886	0.159274	7.90372	2.70693e-15	1.30191e-13	289.855	388.28	333.804	325.602	131.7	133.165	136.48	159.488
200	ENSECAG00000020614	61.8517	-1.93826	0.245463	-7.89633	2.87243e-15	1.3746e-13	26.1243	24.5747	30.8919	20.5334	87.5219	109.605	85.5705	109.992
201	ENSECAG00000028640	141.325	1.77735	0.225233	7.89115	2.99426e-15	1.42577e-13	225.166	199.874	238.554	211.201	60.015	40.9737	88.82	65.9951
202	ENSECAG00000012692	44.102	-3.41663	0.433086	-7.88905	3.04503e-15	1.44277e-13	1.24401	14.7448	4.29054	8.80005	84.1877	108.58	66.0734	64.8951
203	ENSECAG00000016497	59.364	1.94085	0.246062	7.88764	3.07959e-15	1.44972e-13	97.0331	81.0965	112.412	86.0449	22.5056	25.6086	24.9129	25.2981
204	ENSECAG00000020735	81.6155	1.91962	0.243384	7.88722	3.08999e-15	1.44972e-13	106.985	104.852	155.318	148.623	30.0075	30.7303	37.911	38.4971
205	ENSECAG00000000565	40.0116	2.48572	0.316352	7.85745	3.92029e-15	1.8303e-13	82.1049	61.4367	64.3582	64.5337	15.8373	14.3408	7.5822	9.89926
206	ENSECAG00000019800	27.6549	-3.67482	0.467726	-7.85678	3.94131e-15	1.83118e-13	2.48803	5.73409	2.57433	4.88892	40.01	38.925	62.8239	63.7952
207	ENSECAG00000036534	486.099	-2.50115	0.318431	-7.85462	4.00987e-15	1.85403e-13	210.238	85.1923	195.649	93.8672	818.538	573.632	1137.33	774.342
208	ENSECAG00000019974	121.098	-1.56303	0.199402	-7.83861	4.55565e-15	2.09626e-13	42.2965	69.6283	68.6487	62.5781	188.38	192.577	187.389	157.288
209	ENSECAG00000013295	156.152	-1.30384	0.167338	-7.79168	6.61245e-15	3.02812e-13	80.8609	105.671	81.5203	90.9338	207.552	239.696	231.799	211.184
210	ENSECAG00000041112	130.074	-1.93012	0.248009	-7.78248	7.11165e-15	3.24122e-13	77.1288	53.2452	46.3379	41.0669	210.886	165.944	179.806	266.18
211	ENSECAG00000018336	118.682	1.56554	0.201328	7.77605	7.48262e-15	3.37812e-13	205.262	141.714	175.912	186.757	50.8461	65.558	57.4081	65.9951
212	ENSECAG00000021408	92.8693	1.51035	0.194229	7.7761	7.47944e-15	3.37812e-13	136.841	151.544	133.007	128.09	46.6783	43.0224	46.5764	57.1957
213	ENSECAG00000021941	47.6977	-2.17996	0.280662	-7.76718	8.02512e-15	3.60603e-13	9.95211	20.4789	19.7365	17.6001	81.6871	74.7771	67.1566	90.1932
214	ENSECAG00000014982	89.7738	-2.07811	0.26787	-7.75789	8.63527e-15	3.86206e-13	17.4162	31.9471	44.6217	42.0447	135.867	172.09	121.315	152.889
215	ENSECAG00000023472	58.296	2.30889	0.297997	7.74801	9.33439e-15	4.15532e-13	68.4207	125.331	106.405	87.0227	15.8373	16.3895	21.6634	25.2981
216	ENSECAG00000023646	123.737	-1.50386	0.194568	-7.72923	1.08202e-14	4.79444e-13	63.4447	67.1708	57.4933	70.4004	224.223	155.7	175.474	175.987
217	ENSECAG00000009313	47.2135	2.13461	0.276712	7.71419	1.21755e-14	5.37011e-13	65.9327	76.1815	85.8109	79.2004	15.8373	13.3165	23.8298	17.5987
218	ENSECAG00000022109	753.131	-1.1478	0.148969	-7.70498	1.30861e-14	5.74527e-13	450.333	412.036	512.291	498.669	1029.42	878.887	1023.6	1219.81
219	ENSECAG00000006133	45.0102	-2.51913	0.328699	-7.66396	1.80286e-14	7.87908e-13	8.7081	11.4682	18.8784	13.689	74.1852	54.2902	98.5686	80.294
220	ENSECAG00000000354	49.7252	-3.68851	0.481406	-7.66195	1.83135e-14	7.96719e-13	2.48803	13.1065	3.43244	8.80005	40.8436	109.605	100.735	118.791
221	ENSECAG00000023203	74.1454	3.16347	0.414769	7.62708	2.40126e-14	1.03993e-12	51.0046	161.374	155.318	166.223	20.8385	12.2921	18.4139	7.69942
222	ENSECAG00000016940	44.105	2.92184	0.383416	7.62054	2.52625e-14	1.08913e-12	39.8084	82.7348	98.6825	89.9561	7.50188	12.2921	8.66537	13.199
223	ENSECAG00000017881	168.726	1.40591	0.184544	7.61827	2.57097e-14	1.10344e-12	218.946	301.45	231.689	227.823	100.859	94.2396	76.9052	97.8927
224	ENSECAG00000020872	316.193	-1.08803	0.142973	-7.61001	2.74081e-14	1.17108e-12	194.066	178.576	229.973	206.312	433.442	390.275	467.93	428.968
225	ENSECAG00000034729	49.2058	-5.08267	0.668652	-7.60136	2.93034e-14	1.2465e-12	2.48803	5.73409	0	2.93335	71.6846	193.601	31.412	85.7936
227	ENSECAG00000022204	120.105	1.49667	0.197099	7.59346	3.11465e-14	1.31323e-12	155.502	166.289	198.223	188.712	56.6809	68.631	50.9091	75.8943
228	ENSECAG00000020719	111.241	1.42305	0.187745	7.57966	3.46455e-14	1.45435e-12	169.186	163.831	151.027	164.268	61.6821	55.3145	49.8259	74.7944
229	ENSECAG00000021174	26.1615	8.1379	1.07448	7.57383	3.6237e-14	1.51451e-12	65.9327	33.5854	47.196	62.5781	0	0	0	0
230	ENSECAG00000015387	100.269	2.14114	0.28343	7.5544	4.2081e-14	1.7444e-12	100.765	153.182	211.953	187.734	35.0088	49.1685	35.7447	28.5979
231	ENSECAG00000023395	30.5723	3.6603	0.484531	7.55433	4.21017e-14	1.7444e-12	65.9327	80.2773	39.473	41.0669	4.16771	8.19475	2.16634	3.29975
232	ENSECAG00000019690	544.135	2.37612	0.314742	7.54942	4.37212e-14	1.80369e-12	608.323	727.411	1380.7	932.805	152.538	96.2883	236.131	218.884
233	ENSECAG00000022068	351.379	1.28434	0.170495	7.533	4.9587e-14	2.0369e-12	603.347	485.76	459.946	445.869	248.396	196.674	189.555	181.486
234	ENSECAG00000002072	39.5664	2.55664	0.339749	7.52508	5.26863e-14	2.14687e-12	60.9567	68.8091	49.7703	90.9338	11.6696	8.19475	12.9981	13.199
235	ENSECAG00000013968	330.801	-1.23757	0.164461	-7.52502	5.27129e-14	2.14687e-12	191.578	235.098	204.23	156.445	514.295	481.441	434.352	428.968
236	ENSECAG00000024322	29.0152	3.49922	0.466686	7.49802	6.47866e-14	2.62743e-12	67.1767	59.7984	45.4798	41.0669	6.66834	2.04869	1.08317	8.79934
237	ENSECAG00000010689	137.063	1.41841	0.189349	7.49097	6.83683e-14	2.75135e-12	226.41	174.48	217.96	178.934	68.3504	67.6067	72.5725	90.1932
239	ENSECAG00000023271	117.661	-1.63005	0.218145	-7.47232	7.87948e-14	3.15542e-12	77.1288	58.9793	48.0541	46.9336	157.539	157.749	211.218	183.686
240	ENSECAG00000024928	224.064	-1.9522	0.261288	-7.47145	7.93133e-14	3.16295e-12	87.081	63.8942	120.993	95.8228	260.899	278.621	441.934	443.267
241	ENSECAG00000011362	61.9427	-1.81579	0.243646	-7.45257	9.15385e-14	3.63533e-12	26.1243	21.2981	30.0338	32.2668	86.6884	115.751	90.9864	92.3931
242	ENSECAG00000004556	58.2436	1.86372	0.250248	7.44749	9.51356e-14	3.76257e-12	92.057	79.4582	90.1014	103.645	23.3392	18.4382	31.412	27.4979
244	ENSECAG00000008125	70.0899	1.60106	0.2166	7.3918	1.44859e-13	5.68214e-12	109.473	103.214	91.8176	117.334	35.0088	30.7303	35.7447	37.3972
245	ENSECAG00000010808	39.7619	2.17662	0.294849	7.38216	1.55742e-13	6.08411e-12	55.9806	67.99	58.3514	78.2227	15.8373	13.3165	12.9981	15.3988
246	ENSECAG00000010951	70.5286	-1.97755	0.268599	-7.36249	1.80517e-13	7.02327e-12	18.6602	22.1172	42.0473	30.3113	95.8573	125.994	112.65	116.591
247	ENSECAG00000020102	136.898	1.34361	0.18304	7.34053	2.12742e-13	8.24354e-12	213.97	189.225	193.074	188.712	65.8498	71.704	73.6556	98.9926
249	ENSECAG00000021193	179.281	-1.49562	0.203867	-7.33623	2.19696e-13	8.44463e-12	126.889	84.3731	81.5203	85.0671	301.742	289.889	245.88	218.884
250	ENSECAG00000007671	169.458	1.306	0.178479	7.31742	2.52788e-13	9.67772e-12	194.066	284.247	231.689	254.224	95.0238	91.1666	99.6518	105.592
251	ENSECAG00000025104	1424.12	1.12902	0.154538	7.30579	2.75633e-13	1.05103e-11	1523.92	2143.73	2142.7	2006.41	888.556	788.744	896.866	1002.02
252	ENSECAG00000010385	320.284	1.84452	0.254217	7.25569	3.99608e-13	1.51772e-11	386.888	500.504	627.278	487.914	90.0225	111.653	178.723	179.287
253	ENSECAG00000017232	30.892	-6.40522	0.883489	-7.24991	4.17036e-13	1.57765e-11	1.24401	0	0	1.95557	40.8436	65.558	68.2398	69.2948
254	ENSECAG00000035897	36.0862	2.69317	0.371587	7.24774	4.23798e-13	1.59692e-11	38.5644	84.3731	57.4933	69.4226	10.0025	9.21909	11.9149	7.69942
255	ENSECAG00000023645	29.8644	-7.6767	1.06154	-7.23169	4.77005e-13	1.79036e-11	0	0.819156	0	0	72.5182	52.2415	68.2398	45.0966
256	ENSECAG00000006859	301.454	-1.20593	0.166817	-7.22903	4.86445e-13	1.81866e-11	181.626	177.757	188.784	181.868	525.131	419.981	385.609	350.874
257	ENSECAG00000013874	8241.29	1.85201	0.256708	7.21446	5.41465e-13	2.01648e-11	13969	12836.2	12647.7	12175.4	2357.26	5599.06	2540.04	3805.71
258	ENSECAG00000031204	104.761	-1.57685	0.219047	-7.19867	6.08014e-13	2.25554e-11	62.2007	36.862	54.0609	58.667	170.876	128.043	167.892	159.488
259	ENSECAG00000021134	20.497	-4.20306	0.584352	-7.19269	6.35281e-13	2.34759e-11	1.24401	4.09578	0.858109	1.95557	43.3442	49.1685	31.412	31.8976
260	ENSECAG00000016619	93.3212	1.56732	0.218738	7.16528	7.76262e-13	2.85754e-11	110.717	148.267	136.439	162.312	48.3454	39.9494	42.2437	58.2956
261	ENSECAG00000021205	320.279	2.5041	0.349633	7.16208	7.94647e-13	2.91401e-11	1020.09	318.652	432.487	407.736	105.026	120.873	66.0734	91.2932
262	ENSECAG00000024993	5462.38	-1.46659	0.204886	-7.15807	8.18187e-13	2.98888e-11	4048.02	2358.35	2541.72	2665.44	8435.44	7529.95	9551.4	6568.71
264	ENSECAG00000019855	60.5193	-1.81903	0.254182	-7.1564	8.2821e-13	3.00257e-11	23.6363	33.5854	25.7433	23.4668	107.527	108.58	75.822	85.7936
265	ENSECAG00000020716	335.309	1.35044	0.188829	7.15165	8.57414e-13	3.09672e-11	354.544	534.09	462.521	574.937	195.049	165.944	179.806	215.584
266	ENSECAG00000000685	404.619	-1.79642	0.251399	-7.14572	8.9527e-13	3.22129e-11	283.635	131.065	187.926	123.201	583.479	623.825	684.564	619.254
267	ENSECAG00000021297	67.5109	-1.85412	0.259526	-7.14425	9.04911e-13	3.24379e-11	29.8563	22.1172	39.473	25.4224	84.1877	120.873	118.066	100.092
268	ENSECAG00000011267	187.126	1.18993	0.166754	7.13579	9.62298e-13	3.43662e-11	273.683	268.683	225.683	273.779	130.866	96.2883	120.232	107.792
269	ENSECAG00000012106	29.3064	-2.87447	0.403787	-7.11876	1.08902e-12	3.87473e-11	3.73204	7.37241	6.86487	9.77783	61.6821	55.3145	31.412	58.2956
270	ENSECAG00000013883	19.9406	-4.34436	0.610884	-7.1116	1.14707e-12	4.06613e-11	0	0.819156	4.29054	1.95557	45.0113	43.0224	30.3288	34.0974
271	ENSECAG00000012399	600.134	-1.09347	0.153791	-7.1101	1.15963e-12	4.0955e-11	384.4	331.758	426.48	389.158	740.185	716.016	969.438	843.637
272	ENSECAG00000029003	80.3973	1.88719	0.26564	7.10431	1.20924e-12	4.255e-11	95.789	119.597	130.433	159.379	22.5056	37.9007	33.5783	43.9967
273	ENSECAG00000007599	32.9219	2.25687	0.317999	7.0971	1.27403e-12	4.46658e-11	51.0046	56.5218	55.7771	54.7559	12.5031	15.3652	9.74854	7.69942
274	ENSECAG00000027668	44.4414	-2.28494	0.322651	-7.08177	1.42326e-12	4.97153e-11	11.1961	17.2023	12.0135	19.5557	55.0138	60.4363	88.82	91.2932
275	ENSECAG00000020695	27.9538	2.69066	0.380012	7.08047	1.43669e-12	5.00019e-11	48.5165	34.4046	54.0609	56.7114	7.50188	7.1704	8.66537	6.59951
276	ENSECAG00000006765	30.9006	2.94094	0.415851	7.0721	1.5261e-12	5.29215e-11	47.2725	51.6068	64.3582	54.7559	3.33417	6.14606	4.33269	15.3988
277	ENSECAG00000011995	118.298	-1.48763	0.210741	-7.05905	1.67642e-12	5.79244e-11	63.4447	81.0965	45.4798	58.667	180.879	189.504	172.224	155.088
278	ENSECAG00000005086	57.7591	-2.03967	0.289043	-7.05662	1.70597e-12	5.87333e-11	23.6363	29.4896	23.1689	13.689	80.02	122.921	86.6537	82.4938
279	ENSECAG00000006931	80.3677	1.96088	0.278202	7.0484	1.80984e-12	6.20858e-11	135.597	151.544	98.6825	125.156	25.8398	32.779	22.7466	50.5962
280	ENSECAG00000006869	111.535	-1.96276	0.278702	-7.04252	1.88791e-12	6.45327e-11	26.1243	37.6812	66.0744	50.8447	148.37	148.53	214.468	200.185
281	ENSECAG00000023180	418.274	1.16656	0.165719	7.0394	1.93066e-12	6.57593e-11	694.16	611.91	477.109	531.914	226.723	280.67	275.126	248.581
282	ENSECAG00000021001	41.6986	2.00943	0.286047	7.02482	2.14342e-12	7.2747e-11	77.1288	65.5325	60.9257	63.5559	14.1702	19.4625	11.9149	20.8984
283	ENSECAG00000005244	199.524	-1.09032	0.15536	-7.01798	2.25092e-12	7.61255e-11	131.865	115.501	135.581	128.09	300.909	289.889	252.379	241.982
284	ENSECAG00000014155	759.512	1.68624	0.241222	6.99041	2.74082e-12	9.23674e-11	1403.25	893.699	1469.08	869.249	266.733	465.052	382.359	326.676
285	ENSECAG00000024271	45.7474	-2.18298	0.312559	-6.98424	2.86402e-12	9.61808e-11	23.6363	12.2873	14.5879	16.6223	64.1827	97.3126	80.1547	57.1957
287	ENSECAG00000021824	220.996	-1.13668	0.162821	-6.98115	2.92764e-12	9.76321e-11	156.746	140.076	123.568	133.956	344.253	320.619	291.373	257.381
288	ENSECAG00000010710	80.4876	-1.42668	0.204645	-6.9715	3.1359e-12	1.04214e-10	51.0046	43.4153	35.1825	45.9558	118.363	105.507	123.482	120.991
289	ENSECAG00000021493	176.945	1.23842	0.177748	6.9673	3.23078e-12	1.06996e-10	276.171	194.14	273.737	250.313	97.5244	106.532	112.65	104.492
290	ENSECAG00000007470	139.198	2.84851	0.409854	6.95006	3.65137e-12	1.20508e-10	85.8369	385.003	215.385	291.379	30.0075	50.1928	20.5803	35.1974
292	ENSECAG00000001324	27.4157	-2.67789	0.385779	-6.94151	3.87931e-12	1.27154e-10	9.95211	6.55325	6.86487	6.84448	57.5144	56.3389	41.1605	34.0974
293	ENSECAG00000011438	105.711	-1.9148	0.276138	-6.93423	4.08445e-12	1.33421e-10	41.0524	56.5218	42.0473	37.1558	159.207	246.867	145.145	117.691
295	ENSECAG00000010277	304.61	1.07174	0.154885	6.91958	4.52976e-12	1.46964e-10	394.352	407.94	411.892	436.091	182.546	158.773	225.3	219.984
296	ENSECAG00000000184	92.5328	-1.32125	0.190978	-6.91831	4.57068e-12	1.4779e-10	63.4447	47.5111	56.6352	44.978	132.533	132.14	133.23	129.79
297	ENSECAG00000014295	25.064	-5.32956	0.771991	-6.90367	5.06775e-12	1.63311e-10	3.73204	0.819156	0	0.977783	80.02	47.1198	22.7466	45.0966
301	ENSECAG00000040215	1043.39	-1.40825	0.204469	-6.88734	5.68471e-12	1.80759e-10	490.141	507.058	604.109	682.493	1632.91	1030.49	1558.68	1841.26
303	ENSECAG00000024373	86.0611	-1.38273	0.201024	-6.87844	6.05105e-12	1.91137e-10	51.0046	43.4153	47.196	49.8669	135.867	102.434	127.814	130.89
304	ENSECAG00000012007	19.8897	-4.3206	0.628198	-6.87776	6.07994e-12	1.91418e-10	0	0.819156	2.57433	3.91113	23.3392	37.9007	46.5764	43.9967
305	ENSECAG00000000879	47.8644	1.89375	0.275384	6.87675	6.12315e-12	1.92147e-10	74.6408	63.075	95.2501	68.4448	18.3379	18.4382	23.8298	20.8984
306	ENSECAG00000020388	93.1722	2.05426	0.299091	6.86836	6.49434e-12	2.03129e-10	227.654	131.884	141.588	100.712	46.6783	37.9007	28.1625	30.7977
307	ENSECAG00000009157	279.804	-1.13878	0.165961	-6.86175	6.80233e-12	2.12069e-10	174.162	173.661	193.074	157.423	348.421	320.619	431.102	439.967
309	ENSECAG00000014597	66.5463	1.57107	0.229741	6.83844	8.00588e-12	2.47975e-10	109.473	103.214	84.0947	101.689	34.1752	28.6816	29.2456	41.7969
311	ENSECAG00000005460	66.0909	1.60892	0.236056	6.81586	9.36995e-12	2.87435e-10	93.301	92.5647	104.689	106.578	23.3392	30.7303	36.8278	40.6969
312	ENSECAG00000015342	184.254	-5.04224	0.739749	-6.81614	9.352e-12	2.87435e-10	13.6841	0.819156	6.86487	22.489	240.06	340.082	297.872	552.159
313	ENSECAG00000006110	14.8459	-7.38834	1.08412	-6.81505	9.42285e-12	2.88135e-10	0	0	0	0	27.5069	24.5842	27.0793	39.597
315	ENSECAG00000021973	22.0094	-7.23103	1.06227	-6.80712	9.95724e-12	3.02542e-10	1.24401	0	0	0	49.179	48.1441	37.911	39.597
316	ENSECAG00000000811	89.3983	-1.36343	0.200418	-6.8029	1.02534e-11	3.10553e-10	43.5405	50.7877	52.3446	52.8003	130.033	114.726	118.066	152.889
318	ENSECAG00000016060	185.698	1.49885	0.220489	6.79787	1.06178e-11	3.1957e-10	292.343	290.8	246.277	267.913	86.6884	133.165	63.9071	104.492
319	ENSECAG00000024869	156.894	1.48646	0.218839	6.79248	1.10222e-11	3.30702e-10	222.678	181.034	272.879	248.357	73.3517	111.653	70.4061	74.7944
320	ENSECAG00000011846	152.811	-1.6925	0.249753	-6.77669	1.22963e-11	3.67775e-10	49.7605	94.203	66.9325	76.2671	187.547	185.406	264.294	298.078
321	ENSECAG00000018564	55.7633	1.95277	0.288365	6.77186	1.2714e-11	3.79084e-10	84.5929	118.778	70.3649	80.1782	18.3379	23.5599	19.4971	30.7977
322	ENSECAG00000010059	142.885	2.01102	0.297268	6.76502	1.33292e-11	3.95556e-10	322.2	218.715	221.392	154.49	67.5169	72.7284	55.2417	30.7977
324	ENSECAG00000024644	117.051	-1.28099	0.189378	-6.76423	1.3402e-11	3.95898e-10	64.6887	78.639	55.7771	73.3337	144.203	178.236	177.64	163.888
325	ENSECAG00000000711	76.7927	1.4897	0.220587	6.75333	1.44485e-11	4.25498e-10	113.205	124.512	91.8176	124.178	47.5119	38.925	38.9942	35.1974
326	ENSECAG00000009436	85.9657	-1.42828	0.211536	-6.75197	1.4585e-11	4.282e-10	42.2965	45.0536	60.9257	37.1558	120.03	128.043	133.23	120.991
327	ENSECAG00000017082	75.1074	1.44372	0.21439	6.73407	1.64981e-11	4.82885e-10	116.937	97.4796	120.135	104.623	37.5094	35.852	49.8259	38.4971
328	ENSECAG00000014981	98.7233	1.58495	0.235645	6.72598	1.74413e-11	5.08934e-10	159.234	139.257	136.439	156.445	35.0088	39.9494	54.1586	69.2948
329	ENSECAG00000018018	87.2157	-1.3073	0.194422	-6.724	1.76799e-11	5.14328e-10	47.2725	54.8835	51.4865	46.9336	142.536	118.824	115.899	119.891
330	ENSECAG00000024622	104.839	1.41384	0.210707	6.70997	1.94661e-11	5.64575e-10	164.21	136.799	166.473	141.779	50.0125	45.0711	59.5744	74.7944
331	ENSECAG00000018063	21.7473	2.95584	0.441451	6.69575	2.1457e-11	6.20437e-10	41.0524	36.862	41.1892	35.2002	6.66834	1.02434	7.5822	4.39967
333	ENSECAG00000020280	523.392	1.17415	0.175506	6.69008	2.2305e-11	6.41084e-10	610.811	803.592	814.345	670.759	275.069	276.573	346.615	389.371
334	ENSECAG00000014566	96.4054	3.37471	0.505013	6.68241	2.35039e-11	6.73521e-10	400.572	71.2666	153.601	78.2227	17.5044	19.4625	11.9149	18.6986
336	ENSECAG00000002715	137.911	1.29679	0.19433	6.67313	2.50412e-11	7.13177e-10	162.966	242.47	191.358	186.757	81.6871	83.9962	67.1566	86.8935
337	ENSECAG00000022504	76.4353	1.4947	0.224001	6.67272	2.51113e-11	7.13177e-10	92.057	135.161	102.973	120.267	35.8423	38.925	41.1605	45.0966
338	ENSECAG00000013610	93.5723	-1.48581	0.222848	-6.6674	2.60379e-11	7.37303e-10	62.2007	53.2452	45.4798	37.1558	162.541	140.335	133.23	114.391
339	ENSECAG00000017188	172.999	1.1016	0.165261	6.66582	2.63196e-11	7.43068e-10	253.779	252.3	239.412	199.468	124.198	109.605	100.735	104.492
340	ENSECAG00000020694	88.2657	-1.38998	0.208537	-6.66539	2.63967e-11	7.43068e-10	44.7845	43.4153	44.6217	62.5781	145.036	115.751	125.648	124.291
341	ENSECAG00000017386	201.708	1.83818	0.276441	6.64945	2.94193e-11	8.25724e-10	376.936	328.482	296.906	259.113	84.1877	142.384	54.1586	71.4946
342	ENSECAG00000009402	56.0853	2.98426	0.448861	6.64853	2.96042e-11	8.28484e-10	38.5644	105.671	111.554	141.779	5.00125	13.3165	12.9981	19.7985
343	ENSECAG00000019795	346.628	1.31108	0.197276	6.64596	3.01256e-11	8.40619e-10	497.605	460.366	506.284	511.381	176.711	148.53	194.971	277.179
344	ENSECAG00000019392	91.7319	1.73168	0.260868	6.63814	3.17667e-11	8.83834e-10	125.645	128.608	137.297	172.09	35.0088	55.3145	25.9961	53.896
346	ENSECAG00000014260	22.6414	-3.06889	0.462785	-6.63134	3.32642e-11	9.2015e-10	7.46408	1.63831	7.72298	2.93335	40.01	29.706	47.6595	43.9967
348	ENSECAG00000037214	20.2811	-7.11948	1.07645	-6.61383	3.74511e-11	1.03001e-09	0	0.819156	0	0	55.0138	40.9737	35.7447	29.6978
349	ENSECAG00000009134	186.296	1.43012	0.216251	6.61322	3.76037e-11	1.03125e-09	218.946	303.907	326.081	236.624	85.8548	81.9475	108.317	128.69
350	ENSECAG00000036849	40.9865	-2.17416	0.328794	-6.61253	3.77819e-11	1.03317e-09	14.9282	15.564	19.7365	8.80005	49.179	75.8014	84.4874	59.3955
351	ENSECAG00000020320	39.0063	2.11175	0.319582	6.60786	3.89918e-11	1.06322e-09	53.4926	48.3302	76.3717	75.2893	15.8373	13.3165	18.4139	10.9992
353	ENSECAG00000003260	107.927	-2.3797	0.361002	-6.59192	4.34183e-11	1.17721e-09	12.4401	58.9793	39.473	26.4001	131.7	226.38	170.058	197.985
355	ENSECAG00000016931	341.05	1.43655	0.218657	6.5699	5.0349e-11	1.35744e-09	511.29	382.546	600.676	496.714	134.2	158.773	224.216	219.984
356	ENSECAG00000023740	149.86	-1.22706	0.186799	-6.56887	5.06994e-11	1.36181e-09	108.229	67.99	96.9663	87.0227	195.882	198.723	232.882	211.184
357	ENSECAG00000028274	122.745	-1.38883	0.211435	-6.56858	5.07959e-11	1.36181e-09	74.6408	68.8091	58.3514	70.4004	187.547	222.283	164.642	135.29
358	ENSECAG00000008941	296.629	1.09115	0.166296	6.56147	5.32809e-11	1.42445e-09	447.845	420.227	326.081	421.425	184.213	217.161	161.393	194.685
359	ENSECAG00000014903	116.603	-1.25401	0.191151	-6.56029	5.37049e-11	1.43178e-09	62.2007	67.99	72.0811	72.356	133.367	173.114	159.226	192.486
360	ENSECAG00000020223	23.7199	2.75833	0.421949	6.53712	6.27147e-11	1.66734e-09	44.7845	48.3302	33.4662	38.1335	2.50063	6.14606	6.49903	9.89926
361	ENSECAG00000008046	252.262	1.02095	0.156514	6.52305	6.88941e-11	1.82655e-09	352.056	379.269	324.365	297.246	193.382	161.846	158.143	151.789
362	ENSECAG00000011309	79.6313	1.30737	0.200531	6.51955	7.05192e-11	1.86447e-09	113.205	103.214	115.845	121.245	44.1777	38.925	48.7427	51.6961
363	ENSECAG00000016874	312.838	-1.45081	0.223062	-6.50407	7.81748e-11	2.06119e-09	126.889	172.023	193.933	176.001	431.775	314.473	582.746	504.862
364	ENSECAG00000011764	85.1838	-1.32827	0.20451	-6.49489	8.30964e-11	2.18493e-09	43.5405	53.2452	51.4865	44.978	122.531	100.386	127.814	137.49
365	ENSECAG00000018793	28.7238	2.33387	0.359688	6.48859	8.66409e-11	2.25951e-09	41.0524	48.3302	53.2027	49.8669	15.0038	9.21909	5.41586	7.69942
366	ENSECAG00000020956	12.1577	-7.10465	1.09485	-6.48916	8.63182e-11	2.25951e-09	0	0	0	0	26.6733	23.5599	17.3307	29.6978
367	ENSECAG00000024124	35.2262	1.99119	0.306868	6.48877	8.654e-11	2.25951e-09	57.2246	50.7877	61.7838	54.7559	10.0025	12.2921	15.1644	19.7985
368	ENSECAG00000001130	41.3507	-1.8046	0.278512	-6.47943	9.20724e-11	2.39275e-09	14.9282	13.9257	24.8852	19.5557	67.5169	65.558	61.7408	62.6953
370	ENSECAG00000011479	38.9301	2.80005	0.432249	6.47787	9.30293e-11	2.40644e-09	79.6169	47.5111	78.946	67.467	20.8385	6.14606	5.41586	5.49959
371	ENSECAG00000018757	82.6995	-1.52601	0.235609	-6.47686	9.36505e-11	2.41598e-09	44.7845	44.2344	41.1892	40.0891	90.8561	130.092	157.06	113.292
372	ENSECAG00000022703	16.099	-4.42782	0.683695	-6.4763	9.3998e-11	2.41843e-09	1.24401	0.819156	1.71622	1.95557	24.1727	38.925	34.6615	25.2981
373	ENSECAG00000006213	33.0707	2.05773	0.317822	6.47449	9.51357e-11	2.44114e-09	57.2246	50.7877	44.6217	60.6226	11.6696	12.2921	9.74854	17.5987
374	ENSECAG00000009616	151.524	1.98153	0.306155	6.4723	9.65202e-11	2.47004e-09	194.066	315.375	208.52	250.313	91.6896	75.8014	36.8278	39.597
375	ENSECAG00000018894	111.918	1.10325	0.170835	6.45795	1.0613e-10	2.70872e-09	167.942	144.991	151.027	147.645	73.3517	71.704	64.9903	73.6945
376	ENSECAG00000003045	25.4762	3.13489	0.485479	6.45731	1.0658e-10	2.71298e-09	68.4207	54.0643	33.4662	27.3779	6.66834	6.14606	2.16634	5.49959
377	ENSECAG00000023524	103.49	1.21857	0.189024	6.44662	1.14371e-10	2.90356e-09	118.181	156.459	141.588	162.312	62.5156	63.5093	60.6576	62.6953
378	ENSECAG00000024604	34.0918	2.08388	0.323306	6.44554	1.15189e-10	2.91659e-09	59.7127	49.1494	54.0609	58.667	19.1715	12.2921	7.5822	12.0991
379	ENSECAG00000017574	65.6085	-1.76616	0.274068	-6.44423	1.16187e-10	2.92637e-09	28.6123	29.4896	25.7433	35.2002	66.6834	123.946	96.4022	118.791
380	ENSECAG00000038285	73.0084	1.56096	0.242215	6.44451	1.15976e-10	2.92637e-09	139.33	84.3731	111.554	101.689	39.1765	33.8033	42.2437	31.8976
381	ENSECAG00000018485	199.836	1.32959	0.206347	6.44346	1.16782e-10	2.93365e-09	283.635	214.619	367.271	277.69	102.526	107.556	135.396	109.992
382	ENSECAG00000000547	61.7911	1.69661	0.263569	6.43707	1.21803e-10	3.05176e-09	94.545	81.0965	113.27	88.9783	29.174	31.7546	37.911	17.5987
383	ENSECAG00000038401	16.7539	-4.46947	0.696054	-6.42115	1.35246e-10	3.37973e-09	2.48803	0	0.858109	2.93335	36.6758	41.9981	27.0793	21.9984
384	ENSECAG00000019675	515.855	-1.10024	0.171562	-6.41308	1.42606e-10	3.55438e-09	307.271	303.907	404.169	296.268	673.502	573.632	808.046	760.043
385	ENSECAG00000021002	945.88	1.00961	0.157541	6.4086	1.46862e-10	3.65095e-09	1049.95	1435.16	1227.1	1341.52	521.797	604.363	700.812	686.349
386	ENSECAG00000023949	935.219	-1.0884	0.169848	-6.40804	1.47399e-10	3.65482e-09	653.107	483.302	688.203	569.07	1095.27	1407.45	1459.03	1126.32
389	ENSECAG00000019705	33.672	5.43459	0.849676	6.39607	1.59429e-10	3.92261e-09	11.1961	135.161	46.3379	70.4004	0	4.09737	1.08317	1.09992
390	ENSECAG00000023631	45.2226	-1.70387	0.266513	-6.3932	1.62449e-10	3.98667e-09	14.9282	24.5747	24.8852	19.5557	70.0175	77.8501	59.5744	70.3947
391	ENSECAG00000006127	408.688	-1.00174	0.157015	-6.37992	1.77185e-10	4.33719e-09	284.879	318.652	268.588	216.09	493.457	538.805	593.578	555.458
392	ENSECAG00000020805	188.862	-1.14976	0.180304	-6.37677	1.80856e-10	4.41575e-09	125.645	117.139	114.987	111.467	196.716	296.035	281.625	267.28
394	ENSECAG00000037977	30.1667	2.6198	0.411646	6.3642	1.96304e-10	4.76859e-09	38.5644	66.3517	64.3582	38.1335	7.50188	12.2921	10.8317	3.29975
395	ENSECAG00000010655	56.8882	1.57043	0.246807	6.36299	1.97863e-10	4.79429e-09	105.741	78.639	85.8109	70.4004	25.8398	28.6816	32.4951	27.4979
396	ENSECAG00000010836	47.5255	1.8002	0.283168	6.35735	2.05265e-10	4.9611e-09	70.9088	69.6283	82.3784	72.356	22.5056	15.3652	15.1644	31.8976
397	ENSECAG00000020055	349.569	1.3202	0.207793	6.35343	2.10561e-10	5.07628e-09	379.424	551.292	567.21	497.692	186.713	164.919	178.723	270.58
398	ENSECAG00000010380	22.0629	-6.5152	1.02689	-6.34462	2.22969e-10	5.36191e-09	0	0.819156	0.858109	0	44.1777	38.925	43.3269	48.3964
399	ENSECAG00000011198	202.946	-1.20821	0.190732	-6.33459	2.3798e-10	5.70854e-09	87.081	154.001	113.27	133.956	270.068	274.524	283.791	306.877
400	ENSECAG00000019565	70.8585	2.35015	0.371652	6.32353	2.5566e-10	6.11729e-09	55.9806	183.491	97.8244	135.912	17.5044	21.5112	22.7466	31.8976
401	ENSECAG00000020015	158.551	1.60721	0.254219	6.32213	2.57977e-10	6.15736e-09	339.616	187.587	233.406	195.557	89.189	91.1666	77.9883	53.896
402	ENSECAG00000014281	88.4501	1.45	0.229406	6.3207	2.60388e-10	6.19943e-09	116.937	144.172	123.568	132.001	32.5081	46.0955	62.8239	49.4963
403	ENSECAG00000019772	155.436	-1.02384	0.162093	-6.31635	2.67812e-10	6.36036e-09	95.789	116.32	99.5406	97.7783	227.557	201.796	217.717	186.986
405	ENSECAG00000010862	63.388	1.84493	0.292973	6.29726	3.02945e-10	7.1416e-09	103.253	67.1708	109.838	116.356	26.6733	22.5356	20.5803	40.6969
406	ENSECAG00000023479	153.074	-1.22014	0.193756	-6.29728	3.0291e-10	7.1416e-09	82.1049	117.139	72.9393	94.845	214.22	240.721	210.135	192.486
407	ENSECAG00000007464	42.2771	3.02539	0.480805	6.29234	3.12714e-10	7.35377e-09	38.5644	97.4796	85.8109	79.2004	5.83479	21.5112	5.41586	4.39967
409	ENSECAG00000005573	158.17	-1.31708	0.209795	-6.27796	3.43041e-10	8.0275e-09	95.789	92.5647	102.115	72.356	279.237	249.94	181.973	191.386
410	ENSECAG00000030455	17.1802	3.02045	0.481412	6.27414	3.5157e-10	8.20701e-09	33.5884	27.0322	27.4595	34.2224	3.33417	3.07303	4.33269	4.39967
411	ENSECAG00000020610	193.874	1.14219	0.182081	6.273	3.54151e-10	8.24714e-09	287.367	212.161	298.622	268.89	101.692	127.019	138.646	116.591
412	ENSECAG00000008101	172.285	1.27248	0.202887	6.27185	3.5679e-10	8.28844e-09	200.286	317.833	214.527	241.512	98.358	111.653	108.317	85.7936
413	ENSECAG00000026945	315.159	-1.64275	0.263073	-6.24449	4.25186e-10	9.85341e-09	93.301	194.959	163.899	157.423	345.086	423.054	663.984	479.564
414	ENSECAG00000010292	42.1759	-1.80814	0.289705	-6.24132	4.3388e-10	1.00306e-08	21.1482	23.7555	13.7297	16.6223	75.8523	72.7284	53.0754	60.4955
415	ENSECAG00000004216	7645.6	-1.36805	0.21929	-6.23856	4.41609e-10	1.01847e-08	6018.54	3188.16	4382.36	3492.64	12413.1	8733.55	12105.5	10830.9
416	ENSECAG00000010268	69.1601	1.34591	0.215821	6.2362	4.48319e-10	1.03146e-08	102.009	90.1072	96.9663	108.534	40.8436	46.0955	36.8278	31.8976
417	ENSECAG00000025178	243.271	1.41672	0.227244	6.23435	4.53645e-10	1.04121e-08	242.583	462.823	361.264	348.091	114.195	164.919	115.899	136.39
418	ENSECAG00000019321	27.0393	2.09407	0.336156	6.22945	4.68076e-10	1.07176e-08	44.7845	46.6919	37.7568	45.9558	9.16896	12.2921	8.66537	10.9992
419	ENSECAG00000021403	19.0568	2.71679	0.436148	6.22904	4.69291e-10	1.07198e-08	29.8563	32.7663	36.0406	33.2446	3.33417	4.09737	5.41586	7.69942
420	ENSECAG00000039438	816.49	1.51992	0.244577	6.21448	5.14934e-10	1.17344e-08	1018.85	1364.71	1120.69	1337.61	249.229	599.241	417.021	424.568
421	ENSECAG00000017793	17.4907	-5.58475	0.898895	-6.21291	5.20136e-10	1.18248e-08	0	0.819156	0	1.95557	25.8398	33.8033	37.911	39.597
423	ENSECAG00000002225	19.0925	4.57872	0.73837	6.20111	5.6065e-10	1.2676e-08	57.2246	18.0214	36.8987	34.2224	0	3.07303	0	3.29975
424	ENSECAG00000023457	10.2136	6.7889	1.09483	6.20086	5.61551e-10	1.2676e-08	19.9042	18.8406	21.4527	21.5112	0	0	0	0
425	ENSECAG00000002280	99.8444	1.29321	0.208728	6.19568	5.80351e-10	1.30695e-08	114.449	149.086	142.446	160.356	53.3467	51.2172	54.1586	73.6945
426	ENSECAG00000018444	10.8757	-6.94757	1.12346	-6.18411	6.24539e-10	1.40316e-08	0	0	0	0	28.3404	22.5356	10.8317	25.2981
427	ENSECAG00000014244	38.888	-2.09445	0.338972	-6.17883	6.45783e-10	1.44749e-08	19.9042	9.82988	14.5879	15.6445	79.1865	39.9494	70.4061	61.5954
428	ENSECAG00000004992	205.711	1.13463	0.183848	6.1716	6.76043e-10	1.50825e-08	256.267	282.609	338.953	251.29	101.692	130.092	148.394	136.39
429	ENSECAG00000018267	63.3089	1.63439	0.264809	6.17195	6.74528e-10	1.50825e-08	72.1528	88.4689	98.6825	123.201	25.0063	37.9007	34.6615	26.398
430	ENSECAG00000013303	26.6134	3.24449	0.525792	6.17068	6.7999e-10	1.51353e-08	36.0764	52.426	55.7771	47.9114	0.833542	13.3165	2.16634	4.39967
431	ENSECAG00000019508	1446.29	1.82885	0.296893	6.15995	7.27678e-10	1.61592e-08	1883.44	3346.25	2096.36	1702.32	498.458	1038.68	461.431	543.359
432	ENSECAG00000017606	41.9693	-2.11919	0.344297	-6.15513	7.50139e-10	1.66194e-08	6.22007	23.7555	20.5946	10.7556	79.1865	67.6067	68.2398	59.3955
433	ENSECAG00000000319	1927.78	-1.56946	0.255189	-6.15018	7.73964e-10	1.71077e-08	767.556	832.263	1278.58	1007.12	2078.85	2067.12	3742.36	3648.43
434	ENSECAG00000021393	111.671	-1.29778	0.21114	-6.14654	7.91903e-10	1.74638e-08	64.6887	83.5539	48.9122	60.6226	135.867	170.041	161.393	168.287
435	ENSECAG00000012230	34.5342	2.21715	0.360958	6.1424	8.12845e-10	1.78845e-08	55.9806	45.0536	54.0609	72.356	14.1702	5.12172	10.8317	18.6986
436	ENSECAG00000009003	264.883	-1.16703	0.190118	-6.13842	8.33437e-10	1.82955e-08	130.621	181.034	183.635	155.468	285.071	352.374	399.69	431.168
439	ENSECAG00000013570	59.8086	-1.48781	0.242516	-6.13491	8.52084e-10	1.85796e-08	33.5884	31.9471	25.7433	35.2002	105.026	95.2639	76.9052	74.7944
440	ENSECAG00000026851	23.8157	-2.40508	0.393069	-6.11874	9.43185e-10	2.05164e-08	7.46408	6.55325	9.4392	6.84448	50.0125	31.7546	47.6595	30.7977
441	ENSECAG00000010715	90.7293	1.41298	0.231392	6.10644	1.01879e-09	2.20606e-08	97.0331	158.916	119.277	151.556	45.0113	49.1685	46.5764	58.2956
442	ENSECAG00000023261	405.211	1.03391	0.169315	6.10646	1.01863e-09	2.20606e-08	588.418	610.271	471.96	507.469	247.562	327.79	223.133	265.08
443	ENSECAG00000007522	46.478	2.03893	0.334073	6.10325	1.03934e-09	2.24363e-08	54.7366	95.8413	62.6419	85.0671	12.5031	16.3895	29.2456	15.3988
444	ENSECAG00000020475	300.959	1.00988	0.165473	6.10302	1.04082e-09	2.24363e-08	399.328	489.036	349.25	371.558	217.554	214.088	175.474	191.386
445	ENSECAG00000038761	125.198	-1.22228	0.200791	-6.08735	1.14794e-09	2.46898e-08	60.9567	63.8942	99.5406	75.2893	192.548	172.09	168.975	168.287
446	ENSECAG00000009606	111.283	1.20306	0.198227	6.06912	1.28616e-09	2.76006e-08	141.818	153.182	166.473	159.379	77.5194	56.3389	54.1586	81.3939
447	ENSECAG00000014723	48.9313	2.2076	0.363946	6.06572	1.31361e-09	2.81266e-08	68.4207	53.2452	110.696	88.9783	15.0038	8.19475	24.9129	21.9984
448	ENSECAG00000012368	36.8504	2.54989	0.420464	6.06446	1.32398e-09	2.82852e-08	26.1243	65.5325	81.5203	78.2227	10.0025	7.1704	10.8317	15.3988
449	ENSECAG00000018958	205.094	-1.02739	0.169698	-6.05424	1.41082e-09	3.00734e-08	149.282	119.597	141.588	131.023	319.247	283.743	270.793	225.483
450	ENSECAG00000013597	706.414	1.69291	0.280195	6.04191	1.52298e-09	3.23922e-08	1724.2	834.72	1008.28	749.96	391.765	237.648	304.371	400.37
451	ENSECAG00000018560	74.707	1.7509	0.289998	6.03764	1.56386e-09	3.31878e-08	145.55	146.629	89.2433	79.2004	29.174	37.9007	28.1625	41.7969
452	ENSECAG00000015149	99.1243	1.87649	0.311574	6.02264	1.716e-09	3.63359e-08	84.5929	235.098	155.318	147.645	37.5094	54.2902	42.2437	36.2973
453	ENSECAG00000012663	95.2952	-2.83343	0.470915	-6.01686	1.77838e-09	3.75737e-08	58.4686	7.37241	16.3041	13.689	202.551	137.262	139.729	186.986
454	ENSECAG00000025018	17.2561	2.82559	0.469698	6.01576	1.79042e-09	3.77448e-08	28.6123	36.0429	25.7433	30.3113	3.33417	3.07303	4.33269	6.59951
455	ENSECAG00000014058	158.494	-1.00783	0.167564	-6.01458	1.80355e-09	3.79379e-08	92.057	123.693	107.264	96.8005	224.223	188.479	222.05	213.384
456	ENSECAG00000019911	121.032	-1.15081	0.191388	-6.01296	1.82167e-09	3.8235e-08	82.1049	66.3517	80.6622	72.356	175.877	181.309	179.806	129.79
457	ENSECAG00000008427	21.0407	2.82766	0.470557	6.00917	1.86471e-09	3.90529e-08	49.7605	45.0536	25.7433	27.3779	7.50188	3.07303	5.41586	4.39967
458	ENSECAG00000023160	125.804	-1.07103	0.178279	-6.00762	1.8827e-09	3.93435e-08	85.8369	72.0858	86.669	80.1782	160.874	146.481	191.721	182.586
460	ENSECAG00000018726	47.4302	-1.76908	0.29504	-5.99605	2.02172e-09	4.20649e-08	26.1243	22.1172	22.3108	15.6445	51.6796	93.2152	80.1547	68.1949
461	ENSECAG00000016697	45.5989	1.67416	0.279309	5.99395	2.04807e-09	4.25208e-08	68.4207	79.4582	58.3514	71.3782	19.1715	26.6329	27.0793	14.2989
462	ENSECAG00000013193	67.2235	2.60254	0.434519	5.98947	2.1053e-09	4.36144e-08	38.5644	187.587	125.284	110.49	25.0063	23.5599	12.9981	14.2989
463	ENSECAG00000033049	508.207	1.07055	0.178772	5.98833	2.12004e-09	4.38248e-08	768.8	519.345	715.663	750.938	312.578	325.741	392.108	280.479
464	ENSECAG00000008932	19.1866	2.72946	0.45591	5.98684	2.13958e-09	4.41335e-08	28.6123	30.3088	43.7636	30.3113	3.33417	4.09737	8.66537	4.39967
465	ENSECAG00000006136	23.3689	-2.86506	0.479436	-5.9759	2.2883e-09	4.70996e-08	12.4401	3.27663	6.86487	0.977783	50.8461	31.7546	38.9942	41.7969
466	ENSECAG00000042356	2616.46	1.25981	0.210969	5.97152	2.3505e-09	4.82761e-08	3034.15	4162.13	4027.1	3540.55	1056.93	1928.84	1357.21	1824.76
467	ENSECAG00000033926	57.8273	-2.9179	0.488698	-5.97075	2.36161e-09	4.84003e-08	33.5884	4.09578	10.2973	7.82227	100.025	106.532	137.563	62.6953
469	ENSECAG00000017556	92.1509	-1.35931	0.22789	-5.96476	2.44992e-09	4.99961e-08	36.0764	58.9793	47.196	63.5559	140.035	156.725	119.149	115.491
471	ENSECAG00000011767	30.9743	-1.88301	0.315883	-5.96111	2.50525e-09	5.09081e-08	14.9282	9.01072	14.5879	14.6667	41.6771	49.1685	47.6595	56.0958
472	ENSECAG00000005359	17.4754	3.54904	0.595556	5.9592	2.5347e-09	5.12887e-08	36.0764	44.2344	24.027	24.4446	1.66708	7.1704	1.08317	1.09992
473	ENSECAG00000016814	114.115	1.00432	0.168529	5.95931	2.53302e-09	5.12887e-08	154.258	139.257	158.75	157.423	80.8536	70.6797	76.9052	74.7944
474	ENSECAG00000010085	760.653	1.20844	0.203099	5.95002	2.68112e-09	5.41372e-08	1399.52	896.976	1077.78	874.138	460.115	569.535	438.684	368.472
476	ENSECAG00000015069	55.0635	2.03872	0.342756	5.94801	2.71428e-09	5.45764e-08	62.2007	116.32	63.5001	111.467	15.0038	18.4382	20.5803	32.9975
477	ENSECAG00000038536	1053.8	2.00764	0.337954	5.94057	2.84027e-09	5.69901e-08	595.883	2360.81	1686.18	2108.1	410.103	435.346	340.116	493.863
478	ENSECAG00000032167	45.9474	1.97001	0.331657	5.93988	2.85225e-09	5.71106e-08	60.9567	93.3838	52.3446	86.0449	16.6708	28.6816	12.9981	16.4988
479	ENSECAG00000000099	31.714	-2.30528	0.388176	-5.93874	2.87223e-09	5.73906e-08	3.73204	14.7448	8.58109	14.6667	37.5094	67.6067	59.5744	47.2965
480	ENSECAG00000031913	210.482	-1.29537	0.218169	-5.93743	2.89523e-09	5.77297e-08	73.3968	159.735	128.716	123.201	285.071	316.522	287.04	310.177
481	ENSECAG00000015692	19.1725	3.31067	0.558011	5.93298	2.97484e-09	5.91938e-08	16.1722	31.1279	36.0406	55.7336	2.50063	3.07303	4.33269	4.39967
482	ENSECAG00000012220	160.235	-1.34454	0.226785	-5.92869	3.05356e-09	6.0634e-08	131.865	70.4474	84.9528	77.2449	265.066	191.552	220.967	239.782
483	ENSECAG00000014864	136.57	1.69279	0.285694	5.92521	3.11907e-09	6.18067e-08	116.937	255.577	210.237	251.29	72.5182	46.0955	57.4081	82.4938
484	ENSECAG00000012968	44.5464	1.50786	0.254607	5.92232	3.17425e-09	6.27702e-08	69.6648	71.2666	66.0744	56.7114	24.1727	20.4869	25.9961	21.9984
485	ENSECAG00000014533	56.7753	-1.38753	0.234406	-5.91936	3.23201e-09	6.37805e-08	36.0764	29.4896	29.1757	31.2891	69.184	94.2396	86.6537	78.0941
486	ENSECAG00000014983	27.5682	2.67793	0.453049	5.91091	3.40213e-09	6.69996e-08	26.1243	80.2773	42.0473	42.0447	6.66834	9.21909	8.66537	5.49959
487	ENSECAG00000014565	15.9962	3.42088	0.579382	5.90436	3.54013e-09	6.95741e-08	18.6602	26.213	36.8987	35.2002	2.50063	4.09737	0	4.39967
488	ENSECAG00000022448	486.169	1.3603	0.230689	5.89667	3.70921e-09	7.27477e-08	426.697	828.986	721.67	820.36	235.892	235.599	297.872	322.276
489	ENSECAG00000016464	822.22	1.22505	0.207935	5.89147	3.82772e-09	7.49183e-08	1010.14	916.636	1459.64	1219.3	395.099	414.859	603.326	558.758
490	ENSECAG00000037060	55.6474	2.16542	0.367633	5.89015	3.85837e-09	7.53642e-08	92.057	124.512	91.8176	55.7336	24.1727	12.2921	32.4951	12.0991
492	ENSECAG00000023979	8.43034	-6.57667	1.11979	-5.87315	4.27602e-09	8.31824e-08	0	0	0	0	19.1715	12.2921	20.5803	15.3988
493	ENSECAG00000010546	27.1104	-2.12577	0.362307	-5.8673	4.42937e-09	8.59908e-08	9.95211	6.55325	7.72298	16.6223	43.3442	41.9981	38.9942	51.6961
494	ENSECAG00000023308	494.186	2.38939	0.407505	5.86346	4.53318e-09	8.78282e-08	1698.08	305.545	786.886	529.959	186.713	147.505	166.808	131.99
497	ENSECAG00000022931	58.2773	1.43944	0.245718	5.85811	4.68178e-09	9.02357e-08	99.5211	86.8306	86.669	68.4448	39.1765	26.6329	29.2456	29.6978
498	ENSECAG00000020945	143.641	-1.93848	0.331051	-5.85552	4.75507e-09	9.1387e-08	19.9042	76.1815	61.7838	78.2227	173.377	274.524	222.05	243.082
500	ENSECAG00000003312	103.102	-1.39265	0.238274	-5.84472	5.07413e-09	9.7129e-08	62.2007	45.8728	61.7838	58.667	205.885	120.873	138.646	130.89
501	ENSECAG00000021773	26.4515	-1.95852	0.335262	-5.84176	5.16532e-09	9.85686e-08	7.46408	10.649	12.8716	11.7334	36.6758	48.1441	40.0773	43.9967
502	ENSECAG00000034095	31.4229	-2.46265	0.42157	-5.84161	5.16993e-09	9.85686e-08	12.4401	4.91494	12.0135	9.77783	70.0175	26.6329	64.9903	50.5962
503	ENSECAG00000020885	137.34	1.09637	0.187781	5.83859	5.26455e-09	1.00173e-07	182.87	227.725	154.46	183.823	95.8573	89.1179	79.0715	85.7936
504	ENSECAG00000000612	27.0145	-2.15884	0.369885	-5.83653	5.33004e-09	1.01218e-07	11.1961	11.4682	12.8716	3.91113	51.6796	39.9494	48.7427	36.2973
505	ENSECAG00000015510	66.5032	6.19616	1.06357	5.82579	5.68443e-09	1.07734e-07	349.568	16.3831	102.115	56.7114	0.833542	2.04869	2.16634	2.19984
506	ENSECAG00000008724	112.304	1.40385	0.241446	5.81435	6.08693e-09	1.15134e-07	108.229	192.502	175.054	175.023	48.3454	74.7771	57.4081	67.095
509	ENSECAG00000012645	9.30517	-6.72744	1.16026	-5.79823	6.70186e-09	1.26019e-07	0	0	0	0	30.0075	20.4869	16.2476	7.69942
510	ENSECAG00000036105	117.279	4.05996	0.700741	5.79381	6.88087e-09	1.29131e-07	34.8324	344.865	240.27	264.979	7.50188	18.4382	9.74854	17.5987
511	ENSECAG00000016044	26.4995	2.44871	0.422773	5.79203	6.95406e-09	1.30249e-07	34.8324	51.6068	49.7703	42.0447	1.66708	10.2434	10.8317	10.9992
512	ENSECAG00000013229	22.4118	2.33665	0.404214	5.78071	7.43847e-09	1.3905e-07	38.5644	36.862	40.3311	34.2224	10.0025	6.14606	2.16634	10.9992
513	ENSECAG00000035205	19.8913	-3.51883	0.611526	-5.75419	8.706e-09	1.62427e-07	7.46408	0.819156	4.29054	0.977783	61.6821	35.852	22.7466	25.2981
514	ENSECAG00000009170	131.563	1.30977	0.227707	5.75197	8.82093e-09	1.64251e-07	202.774	143.352	194.791	208.268	50.8461	78.8744	83.4042	90.1932
515	ENSECAG00000007794	66.6295	-1.49422	0.260111	-5.74454	9.21715e-09	1.71296e-07	44.7845	31.1279	43.7636	20.5334	97.5244	105.507	102.901	86.8935
516	ENSECAG00000014943	24.9703	1.95669	0.340847	5.74065	9.43141e-09	1.74938e-07	36.0764	45.8728	39.473	37.1558	9.16896	11.2678	9.74854	10.9992
517	ENSECAG00000011179	57.9883	-1.35218	0.23567	-5.73759	9.60323e-09	1.7778e-07	42.2965	31.1279	30.8919	27.3779	88.3554	92.1909	79.0715	72.5946
518	ENSECAG00000011790	203.524	1.53825	0.269001	5.71837	1.07548e-08	1.98715e-07	216.458	308.003	384.433	301.157	73.3517	109.605	154.893	80.294
519	ENSECAG00000018394	113.024	-1.02155	0.178775	-5.71418	1.10231e-08	2.0328e-07	63.4447	79.4582	85.8109	68.4448	155.039	150.578	139.729	161.688
520	ENSECAG00000010524	49.7739	1.45264	0.254751	5.7022	1.1827e-08	2.17684e-07	89.569	67.1708	60.9257	74.3115	24.1727	30.7303	24.9129	26.398
521	ENSECAG00000008426	263.536	2.20887	0.387453	5.70101	1.19101e-08	2.18794e-07	247.559	377.631	501.136	606.226	65.8498	37.9007	122.398	149.589
522	ENSECAG00000022890	13.5643	-4.48294	0.786744	-5.69809	1.21157e-08	2.22145e-07	0	3.27663	0	0.977783	25.0063	38.925	23.8298	16.4988
523	ENSECAG00000008892	184.648	-1.00749	0.176947	-5.69374	1.24285e-08	2.27444e-07	104.497	117.139	137.297	131.023	273.402	197.698	267.543	248.581
524	ENSECAG00000000072	17.0896	-3.25284	0.571538	-5.69137	1.26023e-08	2.30184e-07	0	6.55325	0	5.8667	29.174	30.7303	32.4951	31.8976
525	ENSECAG00000006636	11.1835	-6.2468	1.09824	-5.68802	1.28524e-08	2.34305e-07	0	0	0	0.977783	21.6721	29.706	18.4139	18.6986
526	ENSECAG00000018114	44.8956	1.6308	0.28678	5.68658	1.29608e-08	2.35833e-07	53.4926	82.7348	60.0676	74.3115	15.8373	23.5599	21.6634	27.4979
528	ENSECAG00000007825	45.4861	-6.07371	1.06909	-5.68121	1.33744e-08	2.42436e-07	4.97605	0	0	0.977783	29.174	89.1179	80.1547	159.488
529	ENSECAG00000010050	91.36	1.09368	0.192521	5.68087	1.34015e-08	2.42469e-07	129.377	114.682	133.865	119.29	52.5131	51.2172	61.7408	68.1949
530	ENSECAG00000019491	37.5388	-1.73294	0.305154	-5.6789	1.35562e-08	2.44805e-07	19.9042	13.1065	14.5879	22.489	58.3479	43.0224	60.6576	68.1949
531	ENSECAG00000020129	53.0185	1.8324	0.322769	5.67712	1.36981e-08	2.46901e-07	114.449	94.203	55.7771	67.467	27.5069	28.6816	15.1644	20.8984
532	ENSECAG00000020163	10.9101	-6.21683	1.09539	-5.67542	1.38348e-08	2.48896e-07	0	0	0.858109	0	26.6733	20.4869	21.6634	17.5987
533	ENSECAG00000024834	51.3067	1.56916	0.276548	5.67412	1.39407e-08	2.50332e-07	102.009	63.8942	60.9257	81.156	30.0075	26.6329	23.8298	21.9984
535	ENSECAG00000028689	242.822	-1.00317	0.176917	-5.67026	1.42579e-08	2.5507e-07	129.377	175.299	182.777	157.423	340.085	259.159	355.28	343.174
536	ENSECAG00000016948	169.946	-1.10496	0.194972	-5.66725	1.45111e-08	2.59114e-07	128.133	111.405	88.3852	104.623	218.388	251.988	272.959	183.686
537	ENSECAG00000011835	155.137	-1.01503	0.179209	-5.66395	1.47924e-08	2.63645e-07	116.937	99.1179	102.973	92.8894	216.721	244.818	196.054	171.587
538	ENSECAG00000022984	54.7596	2.42151	0.427832	5.65996	1.5141e-08	2.69358e-07	121.913	47.5111	118.419	81.156	15.0038	6.14606	30.3288	17.5987
539	ENSECAG00000016926	29.4189	1.86114	0.32894	5.658	1.53151e-08	2.7195e-07	41.0524	45.0536	52.3446	45.9558	13.3367	8.19475	18.4139	10.9992
540	ENSECAG00000010542	32.4776	1.75828	0.310833	5.65668	1.54329e-08	2.73534e-07	49.7605	40.1387	56.6352	53.7781	13.3367	12.2921	14.0812	19.7985
541	ENSECAG00000007147	85.9287	1.34343	0.237702	5.65175	1.58821e-08	2.80974e-07	108.229	154.001	108.98	121.245	43.3442	54.2902	35.7447	61.5954
542	ENSECAG00000001926	44.0466	-1.73489	0.307039	-5.6504	1.60074e-08	2.8267e-07	12.4401	19.6598	32.6081	15.6445	76.6859	66.5823	67.1566	61.5954
543	ENSECAG00000038860	25.8728	-2.17162	0.384698	-5.64499	1.65186e-08	2.9116e-07	13.6841	5.73409	12.8716	5.8667	39.1765	52.2415	44.41	32.9975
545	ENSECAG00000016180	208.154	1.27153	0.225454	5.63988	1.70173e-08	2.98849e-07	276.171	382.546	221.392	298.224	156.706	124.97	100.735	104.492
546	ENSECAG00000028686	115.422	-1.13133	0.200972	-5.62926	1.80982e-08	3.17248e-07	52.2486	69.6283	86.669	79.2004	144.203	146.481	170.058	174.887
548	ENSECAG00000002652	29.9832	-1.927	0.342521	-5.62594	1.84503e-08	3.2224e-07	16.1722	7.37241	18.0203	8.80005	43.3442	51.2172	48.7427	46.1965
549	ENSECAG00000029381	21.0063	2.1449	0.381713	5.61915	1.91897e-08	3.34544e-07	31.1003	31.9471	38.6149	35.2002	7.50188	5.12172	8.66537	9.89926
550	ENSECAG00000022690	24.8378	-2.63275	0.468639	-5.61788	1.93319e-08	3.3641e-07	6.22007	9.01072	3.43244	8.80005	25.0063	46.0955	68.2398	31.8976
551	ENSECAG00000014984	1241.38	1.14615	0.204335	5.60917	2.03302e-08	3.53141e-07	1353.49	1748.9	2025.99	1710.14	590.981	651.482	997.601	852.436
552	ENSECAG00000021731	52.0476	-1.37159	0.24459	-5.6077	2.05033e-08	3.55501e-07	24.8803	25.3938	37.7568	27.3779	70.8511	69.6553	79.0715	81.3939
553	ENSECAG00000029844	124.924	1.04442	0.186437	5.60198	2.11919e-08	3.66778e-07	174.162	184.31	163.041	151.556	77.5194	98.337	85.5705	64.8951
554	ENSECAG00000010969	139.067	-1.00595	0.179596	-5.60118	2.12896e-08	3.67803e-07	95.789	99.9371	88.3852	86.0449	197.549	208.966	188.472	147.389
555	ENSECAG00000022535	105.832	-1.16475	0.20797	-5.60055	2.13678e-08	3.68489e-07	57.2246	54.8835	79.8041	68.4448	120.03	160.822	163.559	141.889
556	ENSECAG00000009419	11.9141	-6.33532	1.13239	-5.59466	2.21054e-08	3.80524e-07	0	0	0.858109	0	19.1715	14.3408	42.2437	18.6986
557	ENSECAG00000016401	87.9157	-1.11628	0.199749	-5.5884	2.29175e-08	3.93794e-07	62.2007	49.9685	54.919	55.7336	116.696	144.432	110.483	108.892
558	ENSECAG00000013693	14326.9	1.01595	0.181854	5.58665	2.31491e-08	3.9706e-07	25586.9	18516.2	16273.2	16316.3	9487.37	11094.7	8597.13	8743.24
560	ENSECAG00000020619	29.6715	1.83056	0.327939	5.58201	2.37751e-08	4.06343e-07	52.2486	48.3302	46.3379	39.1113	18.3379	12.2921	11.9149	8.79934
561	ENSECAG00000010240	110.107	1.22386	0.219302	5.58071	2.39533e-08	4.08658e-07	133.109	166.289	167.331	148.623	51.6796	52.2415	77.9883	83.5937
562	ENSECAG00000010726	20.6958	2.95249	0.529237	5.57876	2.42237e-08	4.12536e-07	65.9327	22.9364	31.75	26.4001	5.83479	6.14606	2.16634	4.39967
564	ENSECAG00000022120	103.949	1.31766	0.23636	5.57479	2.47833e-08	4.20569e-07	169.186	131.065	121.851	172.09	59.1815	79.8988	43.3269	54.9959
565	ENSECAG00000010791	138.132	-2.45189	0.440237	-5.56948	2.55505e-08	4.3282e-07	53.4926	58.9793	28.3176	30.3113	349.254	370.812	109.4	104.492
566	ENSECAG00000015835	79.2489	1.48881	0.267685	5.56178	2.67037e-08	4.51556e-07	82.1049	164.65	102.973	117.334	42.5106	50.1928	36.8278	37.3972
567	ENSECAG00000019888	179.588	-1.06888	0.192285	-5.55883	2.71596e-08	4.58455e-07	88.325	142.533	117.561	113.423	239.227	201.796	259.961	273.879
568	ENSECAG00000005014	153.116	1.22769	0.221143	5.55154	2.83166e-08	4.77145e-07	225.166	206.427	229.115	196.534	65.8498	72.7284	121.315	107.792
570	ENSECAG00000009114	119.991	-1.11001	0.199989	-5.55038	2.85047e-08	4.78629e-07	74.6408	93.3838	71.223	64.5337	195.882	157.749	139.729	162.788
572	ENSECAG00000006306	63.9355	1.82813	0.329738	5.54418	2.95328e-08	4.93296e-07	60.9567	147.448	81.5203	108.534	21.6721	38.925	23.8298	28.5979
573	ENSECAG00000024979	29.7154	2.05028	0.36979	5.54444	2.94903e-08	4.93296e-07	28.6123	61.4367	48.9122	51.8225	7.50188	14.3408	12.9981	12.0991
574	ENSECAG00000007562	41.7363	-1.65781	0.29911	-5.54247	2.98228e-08	4.97272e-07	18.6602	20.4789	12.0135	29.3335	55.0138	69.6553	68.2398	60.4955
575	ENSECAG00000010880	19.5584	2.55988	0.462009	5.54076	3.01159e-08	5.01286e-07	22.3922	28.6705	44.6217	38.1335	7.50188	2.04869	6.49903	6.59951
576	ENSECAG00000019173	34.213	1.65908	0.299524	5.53904	3.04127e-08	5.05347e-07	47.2725	53.2452	51.4865	55.7336	16.6708	15.3652	10.8317	23.0983
577	ENSECAG00000011844	29.611	1.89215	0.341835	5.53528	3.10738e-08	5.15437e-07	59.7127	51.6068	42.0473	33.2446	11.6696	10.2434	15.1644	13.199
578	ENSECAG00000008221	2103.94	-1.26705	0.228925	-5.53476	3.11652e-08	5.16059e-07	1010.14	1567.05	1188.48	1173.34	1923.81	3219.51	2840.08	3909.11
583	ENSECAG00000007343	105.987	-1.08597	0.196698	-5.521	3.37083e-08	5.53382e-07	87.081	54.8835	60.9257	70.4004	139.202	136.238	142.979	156.188
584	ENSECAG00000006500	15.0133	3.61351	0.654978	5.517	3.44842e-08	5.65151e-07	22.3922	14.7448	39.473	34.2224	1.66708	1.02434	1.08317	5.49959
585	ENSECAG00000000485	111.559	1.31216	0.238349	5.50518	3.68785e-08	6.03357e-07	187.846	188.406	126.142	133.956	64.1827	56.3389	50.9091	84.6937
586	ENSECAG00000013654	71.0632	1.52306	0.276684	5.50471	3.69779e-08	6.03951e-07	115.693	67.1708	124.426	115.378	45.8448	39.9494	29.2456	30.7977
587	ENSECAG00000019737	25.4171	3.19375	0.581665	5.49071	4.00332e-08	6.52739e-07	79.6169	18.0214	43.7636	42.0447	5.83479	3.07303	1.08317	9.89926
588	ENSECAG00000022217	40.8671	-1.5985	0.291259	-5.48825	4.05938e-08	6.60754e-07	24.8803	20.4789	19.7365	16.6223	67.5169	66.5823	69.323	41.7969
589	ENSECAG00000009327	66.4722	1.24141	0.226437	5.48235	4.19717e-08	6.82022e-07	89.569	86.0114	107.264	90.9338	44.1777	28.6816	42.2437	42.8968
590	ENSECAG00000015376	77.7787	-1.21588	0.222038	-5.476	4.35057e-08	7.0575e-07	39.8084	59.7984	35.1825	51.8225	110.861	106.532	113.733	104.492
591	ENSECAG00000008327	131.736	-1.11293	0.203367	-5.47254	4.43625e-08	7.18432e-07	104.497	72.0858	88.3852	69.4226	183.379	144.432	205.803	185.886
592	ENSECAG00000016843	105.639	1.0535	0.192537	5.47166	4.4583e-08	7.20784e-07	129.377	126.969	161.324	152.534	73.3517	56.3389	69.323	75.8943
594	ENSECAG00000015487	66.9344	1.3928	0.254883	5.46447	4.6429e-08	7.48101e-07	83.3489	99.1179	110.696	93.8672	32.5081	32.779	28.1625	54.9959
595	ENSECAG00000000074	18.398	-2.39295	0.438886	-5.45234	4.97116e-08	7.99647e-07	3.73204	8.19156	4.29054	6.84448	21.6721	34.8277	36.8278	30.7977
596	ENSECAG00000013889	35.6962	1.56606	0.287807	5.44137	5.28738e-08	8.49085e-07	65.9327	49.1494	48.9122	49.8669	19.1715	14.3408	19.4971	18.6986
597	ENSECAG00000022568	25.3427	1.97626	0.36352	5.43647	5.43465e-08	8.71273e-07	38.5644	41.777	43.7636	38.1335	15.0038	11.2678	4.33269	9.89926
598	ENSECAG00000007148	77.7829	1.36014	0.250246	5.43521	5.47306e-08	8.75964e-07	75.8848	103.214	131.291	136.89	40.8436	51.2172	43.3269	39.597
600	ENSECAG00000013348	69.0867	-1.62595	0.29985	-5.42254	5.87569e-08	9.35712e-07	21.1482	21.2981	47.196	44.978	109.194	85.0205	105.068	118.791
603	ENSECAG00000013860	37.5049	-1.67281	0.308573	-5.42111	5.92287e-08	9.40109e-07	12.4401	22.1172	20.5946	15.6445	65.0163	40.9737	67.1566	56.0958
604	ENSECAG00000000697	70.0364	-1.29663	0.239304	-5.41834	6.0156e-08	9.53233e-07	28.6123	36.0429	53.2027	43.0225	85.8548	110.629	107.234	95.6928
605	ENSECAG00000008923	32004	1.14299	0.211029	5.41628	6.08522e-08	9.62672e-07	63493.2	36067.5	36108.4	40563.3	18730.5	22502.8	21833.5	16733
606	ENSECAG00000010304	67.9043	1.14252	0.211039	5.41379	6.1703e-08	9.74521e-07	88.325	95.8413	95.2501	93.8672	39.1765	37.9007	40.0773	52.796
607	ENSECAG00000010909	21.5452	2.91309	0.538519	5.40944	6.32211e-08	9.96604e-07	38.5644	14.7448	56.6352	42.0447	4.16771	3.07303	4.33269	8.79934
610	ENSECAG00000027686	46.7073	-1.95301	0.361575	-5.40139	6.61263e-08	1.03753e-06	19.9042	27.8513	12.0135	16.6223	51.6796	52.2415	86.6537	106.692
611	ENSECAG00000010965	37.3336	1.7555	0.325102	5.39984	6.66986e-08	1.04309e-06	67.1767	40.1387	66.9325	55.7336	10.836	16.3895	21.6634	19.7985
612	ENSECAG00000019195	122.865	1.53962	0.285113	5.40004	6.66266e-08	1.04309e-06	131.865	157.278	210.237	230.757	39.1765	58.3876	62.8239	92.3931
613	ENSECAG00000021070	9.24979	-5.95811	1.10361	-5.39876	6.71043e-08	1.04772e-06	1.24401	0	0	0	15.0038	18.4382	18.4139	20.8984
614	ENSECAG00000027094	12.0251	-3.95745	0.733271	-5.39698	6.77708e-08	1.05641e-06	3.73204	0.819156	0.858109	0.977783	32.5081	25.6086	12.9981	18.6986
617	ENSECAG00000017103	20.4407	3.54723	0.657567	5.39447	6.87263e-08	1.0634e-06	12.4401	61.4367	31.75	44.978	2.50063	7.1704	3.24951	0
619	ENSECAG00000021113	13.6434	-5.80321	1.07579	-5.39434	6.87747e-08	1.0634e-06	0	0	0.858109	0.977783	20.005	30.7303	40.0773	16.4988
620	ENSECAG00000007734	57.5206	2.33671	0.433301	5.39282	6.93611e-08	1.06881e-06	108.229	72.9049	113.27	89.9561	25.0063	11.2678	4.33269	35.1974
621	ENSECAG00000020292	67.4907	1.67493	0.310567	5.39313	6.924e-08	1.06881e-06	83.3489	73.7241	130.433	123.201	30.0075	20.4869	30.3288	48.3964
622	ENSECAG00000030299	6.26459	-6.14477	1.13949	-5.39256	6.946e-08	1.06881e-06	0	0	0	0	11.6696	13.3165	10.8317	14.2989
623	ENSECAG00000014803	78.1619	1.09662	0.20337	5.39225	6.95823e-08	1.06898e-06	110.717	116.32	95.2501	103.645	45.0113	59.4119	48.7427	46.1965
625	ENSECAG00000008041	18.1615	2.61242	0.485498	5.38091	7.4109e-08	1.13355e-06	24.8803	31.1279	36.8987	31.2891	1.66708	4.09737	4.33269	10.9992
627	ENSECAG00000015720	45.0419	-1.51695	0.281996	-5.37932	7.4768e-08	1.14131e-06	23.6363	16.3831	29.1757	24.4446	79.1865	52.2415	72.5725	62.6953
628	ENSECAG00000017704	12.4785	3.02171	0.562357	5.3733	7.73074e-08	1.1782e-06	23.6363	22.9364	18.0203	24.4446	3.33417	3.07303	1.08317	3.29975
629	ENSECAG00000021299	117.553	1.02061	0.189997	5.37168	7.80072e-08	1.18697e-06	129.377	154.821	159.608	185.779	78.3529	85.0205	66.0734	81.3939
630	ENSECAG00000007426	73.1485	-1.18764	0.221312	-5.36633	8.03555e-08	1.22077e-06	49.7605	41.777	43.7636	44.0002	108.36	123.946	84.4874	89.0933
631	ENSECAG00000015900	56.6088	-1.57534	0.293851	-5.36101	8.27585e-08	1.25528e-06	18.6602	35.2237	26.6014	32.2668	80.8536	62.4849	77.9883	118.791
632	ENSECAG00000017906	36.9746	3.51708	0.656866	5.35433	8.58758e-08	1.3005e-06	13.6841	135.98	48.0541	74.3115	5.00125	13.3165	3.24951	2.19984
633	ENSECAG00000024663	99.626	1.18527	0.221516	5.35075	8.75894e-08	1.32436e-06	115.693	168.746	145.02	124.178	70.0175	70.6797	46.5764	56.0958
636	ENSECAG00000000030	123.122	-1.01044	0.189078	-5.34402	9.09099e-08	1.36808e-06	95.789	81.0965	65.2163	86.0449	170.876	182.333	139.729	163.888
637	ENSECAG00000012844	93.4828	1.16303	0.217752	5.34107	9.23999e-08	1.38832e-06	139.33	149.086	127	101.689	63.3492	45.0711	55.2417	67.095
638	ENSECAG00000005186	55.8069	1.84113	0.344793	5.33981	9.30417e-08	1.39577e-06	46.0285	118.778	69.5068	114.401	24.1727	27.6573	18.4139	27.4979
639	ENSECAG00000019125	54.1493	1.58747	0.297755	5.33148	9.74181e-08	1.45914e-06	57.2246	113.044	80.6622	73.3337	22.5056	28.6816	35.7447	21.9984
640	ENSECAG00000011753	96.9922	1.19721	0.224628	5.32976	9.83425e-08	1.47068e-06	166.698	104.033	134.723	135.912	67.5169	51.2172	48.7427	67.095
642	ENSECAG00000034840	52.4271	1.50453	0.282587	5.32413	1.01436e-07	1.51222e-06	75.8848	61.4367	106.405	66.4893	29.174	26.6329	32.4951	20.8984
644	ENSECAG00000000300	65.7717	-1.888	0.35493	-5.31934	1.04143e-07	1.54775e-06	52.2486	13.9257	22.3108	25.4224	110.861	130.092	88.82	82.4938
646	ENSECAG00000005083	30.6809	-2.04313	0.384268	-5.31696	1.05517e-07	1.56162e-06	11.1961	15.564	9.4392	11.7334	75.0188	29.706	45.4932	47.2965
647	ENSECAG00000017195	31.5114	1.85408	0.348716	5.31687	1.05566e-07	1.56162e-06	54.7366	45.0536	52.3446	44.978	11.6696	6.14606	15.1644	21.9984
650	ENSECAG00000024578	157.855	1.65826	0.312404	5.30805	1.10807e-07	1.63159e-06	292.343	131.884	318.358	216.09	60.8486	51.2172	96.4022	95.6928
651	ENSECAG00000000749	81.9299	-1.19606	0.22536	-5.30733	1.11242e-07	1.63548e-06	64.6887	45.8728	53.2027	36.178	103.359	104.483	131.064	116.591
654	ENSECAG00000037284	56.6709	-1.16093	0.219111	-5.29839	1.16827e-07	1.70979e-06	33.5884	38.5003	34.3244	33.2446	74.1852	76.8258	76.9052	85.7936
655	ENSECAG00000003869	39.9068	1.45137	0.273942	5.2981	1.17013e-07	1.70982e-06	57.2246	63.075	62.6419	50.8447	21.6721	26.6329	15.1644	21.9984
656	ENSECAG00000021009	23.3169	-2.65782	0.501761	-5.29698	1.17733e-07	1.7151e-06	1.24401	13.9257	2.57433	6.84448	32.5081	41.9981	35.7447	51.6961
657	ENSECAG00000024728	78.8144	-1.39623	0.263586	-5.29705	1.1769e-07	1.7151e-06	57.2246	54.0643	30.0338	33.2446	133.367	124.97	95.3191	102.292
659	ENSECAG00000010678	17.7448	-2.25034	0.425482	-5.28891	1.23049e-07	1.7871e-06	4.97605	4.09578	7.72298	7.82227	30.8411	27.6573	35.7447	23.0983
660	ENSECAG00000000371	163.059	1.01398	0.191793	5.28686	1.24435e-07	1.80318e-06	217.702	169.565	223.108	263.024	121.697	110.629	93.1527	105.592
661	ENSECAG00000017487	206.879	1.92716	0.36453	5.28671	1.24533e-07	1.80318e-06	417.989	447.259	209.379	236.624	115.029	125.994	41.1605	61.5954
662	ENSECAG00000009061	43.9861	1.36485	0.258367	5.28263	1.27342e-07	1.84107e-06	55.9806	63.8942	66.0744	67.467	24.1727	31.7546	22.7466	19.7985
663	ENSECAG00000007612	11.0755	-3.62001	0.685561	-5.28036	1.28929e-07	1.8612e-06	2.48803	1.63831	1.71622	0.977783	22.5056	28.6816	12.9981	17.5987
664	ENSECAG00000014752	78.8909	1.36058	0.257739	5.27889	1.2997e-07	1.87341e-06	99.5211	107.309	133.865	113.423	50.0125	25.6086	58.4913	42.8968
665	ENSECAG00000007419	28.2714	-1.76304	0.334132	-5.27649	1.31684e-07	1.89526e-06	8.7081	12.2873	18.0203	11.7334	40.8436	43.0224	54.1586	37.3972
667	ENSECAG00000007414	22.678	-2.12306	0.402987	-5.2683	1.37691e-07	1.97281e-06	1.24401	9.82988	12.8716	8.80005	40.8436	36.8764	34.6615	36.2973
668	ENSECAG00000018603	17.0587	-2.46081	0.46708	-5.26851	1.37536e-07	1.97281e-06	3.73204	3.27663	5.14865	8.80005	28.3404	19.4625	31.412	36.2973
669	ENSECAG00000009638	34.518	1.67438	0.318428	5.25827	1.4542e-07	2.08044e-06	53.4926	68.8091	46.3379	42.0447	21.6721	14.3408	16.2476	13.199
671	ENSECAG00000020103	631.257	1.26749	0.241193	5.2551	1.47941e-07	2.11019e-06	519.998	1047.7	872.697	1126.41	310.911	408.713	336.866	426.768
673	ENSECAG00000018995	114.136	-1.07713	0.205074	-5.25236	1.5016e-07	2.13548e-06	90.813	82.7348	55.7771	65.5115	164.208	163.895	157.06	133.09
674	ENSECAG00000010601	390.168	1.18483	0.225707	5.24942	1.52575e-07	2.16471e-06	568.514	444.802	622.987	530.936	213.387	153.652	303.288	283.779
675	ENSECAG00000019161	112.308	2.49591	0.475474	5.24931	1.52667e-07	2.16471e-06	48.5165	366.982	166.473	180.89	26.6733	53.2659	28.1625	27.4979
676	ENSECAG00000035192	29.7644	1.7345	0.330697	5.245	1.56283e-07	2.2127e-06	37.3204	36.0429	56.6352	52.8003	12.5031	13.3165	12.9981	16.4988
677	ENSECAG00000023223	53.3416	-1.4401	0.274684	-5.24276	1.58189e-07	2.23638e-06	18.6602	27.0322	38.6149	29.3335	63.3492	70.6797	85.5705	93.493
678	ENSECAG00000014262	27.0999	2.22023	0.423595	5.2414	1.59364e-07	2.24966e-06	36.0764	40.9578	55.7771	45.9558	10.836	17.4138	7.5822	2.19984
679	ENSECAG00000009039	76.2958	-1.21809	0.232895	-5.2302	1.69323e-07	2.38673e-06	37.3204	63.8942	41.1892	40.0891	119.196	104.483	96.4022	107.792
681	ENSECAG00000023805	46.2444	-1.48854	0.285478	-5.21422	1.8459e-07	2.5943e-06	36.0764	17.2023	27.4595	17.6001	64.1827	64.5336	76.9052	65.9951
682	ENSECAG00000014036	29.9569	-1.75479	0.336805	-5.21011	1.88726e-07	2.64853e-06	16.1722	9.82988	13.7297	15.6445	50.0125	52.2415	30.3288	51.6961
683	ENSECAG00000008361	9.86029	-3.67853	0.706147	-5.2093	1.89555e-07	2.65627e-06	1.24401	0.819156	1.71622	1.95557	17.5044	17.4138	17.3307	20.8984
684	ENSECAG00000014145	8.18253	-5.79091	1.11298	-5.20307	1.96025e-07	2.74291e-06	0	0	0	0.977783	17.5044	15.3652	18.4139	13.199
685	ENSECAG00000025008	115.484	-1.03591	0.199182	-5.20084	1.98387e-07	2.77192e-06	89.569	70.4474	72.9393	70.4004	127.532	141.359	164.642	186.986
686	ENSECAG00000023455	122.427	1.46655	0.282013	5.20029	1.98976e-07	2.7761e-06	144.306	141.714	250.568	181.868	58.3479	39.9494	79.0715	83.5937
688	ENSECAG00000035110	71.8639	1.24891	0.240384	5.19546	2.04217e-07	2.84093e-06	131.865	89.288	93.5339	89.9561	32.5081	47.1198	42.2437	48.3964
689	ENSECAG00000015850	80.0868	-1.1057	0.21299	-5.19132	2.08805e-07	2.90054e-06	41.0524	62.2559	56.6352	42.0447	113.362	113.702	112.65	98.9926
690	ENSECAG00000016469	610.476	1.3575	0.261515	5.19091	2.09274e-07	2.90284e-06	788.705	552.111	1257.13	914.227	286.738	265.305	417.021	402.57
691	ENSECAG00000020867	42.1002	1.59773	0.307819	5.19048	2.09748e-07	2.90521e-06	57.2246	87.6497	52.3446	55.7336	19.1715	28.6816	19.4971	16.4988
694	ENSECAG00000021517	49.0781	-1.31096	0.252793	-5.18592	2.14946e-07	2.96433e-06	33.5884	23.7555	26.6014	29.3335	56.6809	66.5823	77.9883	78.0941
695	ENSECAG00000019355	19.7225	2.23921	0.43187	5.18493	2.161e-07	2.97596e-06	29.8563	27.0322	40.3311	33.2446	10.0025	2.04869	8.66537	6.59951
696	ENSECAG00000010516	116.352	1.11829	0.215746	5.18337	2.17916e-07	2.99666e-06	143.062	185.948	162.183	145.69	80.02	49.1685	86.6537	78.0941
697	ENSECAG00000000591	13.3908	2.85187	0.550424	5.18122	2.20444e-07	3.02273e-06	22.3922	17.2023	23.1689	31.2891	3.33417	1.02434	5.41586	3.29975
698	ENSECAG00000036646	6.35951	-6.17843	1.19242	-5.18141	2.2022e-07	3.02273e-06	0	0	0	0	19.1715	16.3895	5.41586	9.89926
700	ENSECAG00000018218	15.1587	3.08336	0.595496	5.1778	2.24524e-07	3.06988e-06	18.6602	22.1172	32.6081	35.2002	5.00125	0	1.08317	6.59951
701	ENSECAG00000021654	8.0707	-5.767	1.11468	-5.17367	2.29543e-07	3.13403e-06	0	0.819156	0	0	12.5031	17.4138	17.3307	16.4988
703	ENSECAG00000010042	37.237	1.70897	0.330755	5.16687	2.38046e-07	3.24088e-06	75.8848	42.5961	58.3514	51.8225	20.005	16.3895	9.74854	23.0983
705	ENSECAG00000023496	41.6655	3.34923	0.64923	5.15877	2.48571e-07	3.37457e-06	8.7081	77.0007	88.3852	129.067	4.16771	4.09737	6.49903	15.3988
706	ENSECAG00000011237	136.653	-1.07596	0.208742	-5.15447	2.54355e-07	3.44821e-06	106.985	74.5432	84.9528	87.0227	235.892	153.652	187.389	162.788
707	ENSECAG00000025119	54.2664	-1.31141	0.254557	-5.15172	2.58102e-07	3.49406e-06	27.3683	27.8513	28.3176	41.0669	76.6859	63.5093	74.7388	94.5929
708	ENSECAG00000012473	21.0084	-2.3237	0.451425	-5.14747	2.64025e-07	3.56919e-06	4.97605	8.19156	10.2973	3.91113	21.6721	50.1928	30.3288	38.4971
710	ENSECAG00000012900	168.427	1.30868	0.254443	5.14331	2.69939e-07	3.63885e-06	179.138	314.556	185.352	280.624	95.0238	130.092	81.2378	81.3939
715	ENSECAG00000036729	9.79084	-4.30691	0.840918	-5.12168	3.0283e-07	4.05368e-06	0	0.819156	1.71622	0.977783	15.8373	17.4138	15.1644	26.398
716	ENSECAG00000019382	363.394	-1.42355	0.278232	-5.11644	3.11359e-07	4.16204e-06	184.114	326.024	140.73	137.867	619.322	435.346	489.593	574.157
717	ENSECAG00000032938	8.07634	-5.76792	1.12766	-5.11493	3.13861e-07	4.18963e-06	0	0	0.858109	0	11.6696	20.4869	19.4971	12.0991
718	ENSECAG00000007607	29.6652	1.88888	0.36948	5.11229	3.18284e-07	4.24276e-06	37.3204	36.862	65.2163	46.9336	8.33542	14.3408	18.4139	9.89926
719	ENSECAG00000021704	13.9576	2.48488	0.486158	5.11126	3.20009e-07	4.25838e-06	22.3922	25.3938	20.5946	26.4001	4.16771	6.14606	2.16634	4.39967
723	ENSECAG00000019071	33.316	-1.67873	0.328839	-5.10501	3.30782e-07	4.37886e-06	22.3922	9.01072	14.5879	18.5779	55.0138	40.9737	46.5764	59.3955
724	ENSECAG00000020098	101.91	-1.14189	0.223697	-5.10466	3.31396e-07	4.38092e-06	68.4207	55.7026	71.223	59.6448	180.879	105.507	140.812	133.09
725	ENSECAG00000016998	27.3879	-1.78654	0.350052	-5.10365	3.33169e-07	4.39829e-06	6.22007	12.2873	18.0203	11.7334	36.6758	50.1928	46.5764	37.3972
726	ENSECAG00000004817	137.078	1.46966	0.288046	5.10217	3.35783e-07	4.4267e-06	102.009	252.3	227.399	222.935	63.3492	60.4363	76.9052	91.2932
727	ENSECAG00000000939	91.4192	1.27557	0.250289	5.09641	3.46151e-07	4.5571e-06	92.057	126.969	147.595	149.601	39.1765	47.1198	61.7408	67.095
728	ENSECAG00000023459	298.804	1.34632	0.264189	5.09604	3.46839e-07	4.55988e-06	384.4	348.141	556.055	426.313	149.204	97.3126	211.218	217.784
729	ENSECAG00000019916	324.599	1.03404	0.202942	5.09527	3.48239e-07	4.57201e-06	475.213	343.226	525.163	400.891	199.217	160.822	245.88	246.382
731	ENSECAG00000021473	130.603	1.35234	0.266108	5.0819	3.73675e-07	4.89254e-06	227.654	240.013	146.737	135.912	52.5131	90.1422	67.1566	84.6937
732	ENSECAG00000025150	736.465	1.26361	0.248903	5.0767	3.84049e-07	5.0215e-06	1658.27	886.327	887.285	728.449	439.277	395.397	479.845	416.869
733	ENSECAG00000009716	22.2563	2.25489	0.444431	5.07366	3.90228e-07	5.09532e-06	16.1722	49.1494	39.473	42.0447	6.66834	8.19475	9.74854	6.59951
734	ENSECAG00000011151	246.17	1.00191	0.19753	5.07218	3.93275e-07	5.12811e-06	231.387	381.727	332.088	367.646	170.043	185.406	162.476	138.59
736	ENSECAG00000018788	37.4074	1.54109	0.304622	5.05901	4.21437e-07	5.4804e-06	67.1767	44.2344	64.3582	46.9336	17.5044	14.3408	24.9129	19.7985
737	ENSECAG00000012481	32.3694	-1.52639	0.301772	-5.05809	4.2347e-07	5.49936e-06	13.6841	18.0214	17.1622	17.6001	57.5144	37.9007	53.0754	43.9967
738	ENSECAG00000008296	18.7053	2.35763	0.46614	5.05778	4.24176e-07	5.50107e-06	23.6363	37.6812	37.7568	25.4224	2.50063	4.09737	9.74854	8.79934
739	ENSECAG00000009087	41.9254	-1.47137	0.290932	-5.05743	4.24933e-07	5.50343e-06	14.9282	32.7663	22.3108	17.6001	55.8473	68.631	62.8239	60.4955
740	ENSECAG00000002944	40.916	1.58229	0.31291	5.05669	4.26597e-07	5.51006e-06	47.2725	67.99	69.5068	59.6448	15.0038	13.3165	25.9961	28.5979
741	ENSECAG00000024766	64.3156	1.69023	0.334251	5.05677	4.26427e-07	5.51006e-06	100.765	77.0007	130.433	84.0894	25.0063	14.3408	45.4932	37.3972
742	ENSECAG00000020645	76.513	3.94099	0.780432	5.04976	4.42372e-07	5.70613e-06	21.1482	289.162	102.115	162.312	10.0025	15.3652	6.49903	5.49959
743	ENSECAG00000000166	35.3608	2.8514	0.565071	5.0461	4.50925e-07	5.80862e-06	121.913	19.6598	72.0811	35.2002	12.5031	4.09737	10.8317	6.59951
745	ENSECAG00000009877	57.9521	-1.5121	0.299807	-5.04357	4.56924e-07	5.87009e-06	13.6841	45.8728	32.6081	26.4001	82.5207	91.1666	85.5705	85.7936
746	ENSECAG00000012743	70.2112	1.57641	0.312619	5.04258	4.59291e-07	5.89259e-06	51.0046	131.884	114.987	122.223	37.5094	27.6573	36.8278	39.597
748	ENSECAG00000014368	30.1968	2.35211	0.466615	5.0408	4.63579e-07	5.93171e-06	17.4162	56.5218	67.7906	59.6448	5.83479	9.21909	9.74854	15.3988
749	ENSECAG00000038588	6.36449	6.08648	1.20797	5.0386	4.68941e-07	5.9923e-06	24.8803	11.4682	7.72298	6.84448	0	0	0	0
750	ENSECAG00000009074	21.2583	2.2509	0.446803	5.03778	4.70952e-07	6.00202e-06	42.2965	28.6705	37.7568	32.2668	11.6696	1.02434	7.5822	8.79934
751	ENSECAG00000012316	62.0135	1.30666	0.259373	5.03778	4.70956e-07	6.00202e-06	105.741	63.075	89.2433	95.8228	39.1765	27.6573	32.4951	42.8968
752	ENSECAG00000007779	44.1351	-1.5927	0.316304	-5.03536	4.76945e-07	6.06616e-06	22.3922	11.4682	30.0338	24.4446	80.02	60.4363	71.4893	52.796
753	ENSECAG00000017272	65.7221	1.10705	0.21986	5.03524	4.77256e-07	6.06616e-06	84.5929	77.8198	94.392	102.667	47.5119	35.852	42.2437	40.6969
756	ENSECAG00000012818	396.222	-2.07767	0.413558	-5.0239	5.06317e-07	6.40349e-06	34.8324	167.927	202.514	200.446	448.446	494.758	810.212	810.639
758	ENSECAG00000013051	64.6716	-1.18841	0.237064	-5.01301	5.35857e-07	6.76607e-06	44.7845	40.9578	45.4798	26.4001	78.3529	87.0692	94.2359	100.092
759	ENSECAG00000000037	86.3552	1.03917	0.207363	5.01137	5.40436e-07	6.81491e-06	121.913	94.203	138.156	110.49	54.1802	57.3632	61.7408	52.796
760	ENSECAG00000013135	28.4022	1.57045	0.313828	5.00419	5.60977e-07	7.06461e-06	37.3204	45.8728	42.0473	44.978	16.6708	17.4138	11.9149	10.9992
761	ENSECAG00000007267	69.3308	-1.09541	0.219025	-5.00131	5.69413e-07	7.16143e-06	53.4926	41.777	49.7703	32.2668	90.0225	96.2883	94.2359	96.7927
764	ENSECAG00000011236	39.9412	1.86152	0.373316	4.98646	6.14958e-07	7.70388e-06	47.2725	81.0965	60.9257	60.6226	8.33542	30.7303	16.2476	14.2989
765	ENSECAG00000014412	107.586	-1.08201	0.217013	-4.98592	6.16663e-07	7.71514e-06	52.2486	81.0965	68.6487	73.3337	171.71	165.944	127.814	119.891
766	ENSECAG00000017247	44.7516	1.71649	0.344292	4.98556	6.17817e-07	7.71949e-06	48.5165	103.214	49.7703	72.356	15.0038	27.6573	19.4971	21.9984
767	ENSECAG00000029185	82.7409	1.39393	0.27982	4.98154	6.30816e-07	7.87163e-06	118.181	86.0114	162.183	112.445	35.8423	36.8764	45.4932	64.8951
768	ENSECAG00000017120	311.821	-1.00776	0.202441	-4.97805	6.42279e-07	8.00424e-06	284.879	190.863	204.23	150.579	436.776	457.881	393.191	376.172
770	ENSECAG00000015145	4636.91	3.40449	0.684788	4.9716	6.64021e-07	8.2537e-06	4452.32	11447.7	7545.35	10448.6	121.697	1397.2	743.056	939.33
771	ENSECAG00000007948	56.4456	-1.21879	0.245371	-4.96713	6.79514e-07	8.4334e-06	37.3204	31.1279	33.4662	34.2224	73.3517	103.459	69.323	69.2948
772	ENSECAG00000008013	5.78426	-6.0404	1.21613	-4.96692	6.80241e-07	8.4334e-06	0	0	0	0	15.8373	18.4382	6.49903	5.49959
775	ENSECAG00000039416	12.0446	-2.84961	0.575101	-4.95497	7.23399e-07	8.93374e-06	6.22007	3.27663	0.858109	1.95557	17.5044	17.4138	23.8298	25.2981
776	ENSECAG00000016624	19.6038	-1.97465	0.3986	-4.95396	7.2718e-07	8.96886e-06	11.1961	8.19156	6.86487	5.8667	24.1727	32.779	28.1625	39.597
777	ENSECAG00000011023	69.1645	1.89005	0.381856	4.94962	7.43567e-07	9.15918e-06	49.7605	96.6604	133.007	155.468	17.5044	27.6573	28.1625	45.0966
780	ENSECAG00000023963	32.4171	1.70877	0.345293	4.94876	7.46867e-07	9.18663e-06	48.5165	42.5961	45.4798	61.6003	12.5031	8.19475	16.2476	24.1982
781	ENSECAG00000017141	84.3878	-1.26189	0.255045	-4.94773	7.50832e-07	9.19263e-06	75.8848	45.0536	32.6081	46.9336	105.86	118.824	125.648	124.291
782	ENSECAG00000035649	58.5447	-1.27207	0.257105	-4.94767	7.51085e-07	9.19263e-06	29.8563	31.1279	30.8919	44.978	71.6846	67.6067	88.82	103.392
783	ENSECAG00000023874	4.96573	-5.81316	1.17697	-4.93911	7.84815e-07	9.59319e-06	0	0	0	0	10.0025	12.2921	10.8317	6.59951
785	ENSECAG00000016278	32.2759	1.7663	0.357819	4.93628	7.96248e-07	9.70814e-06	32.3444	41.777	59.2095	65.5115	10.0025	13.3165	16.2476	19.7985
787	ENSECAG00000020425	106.943	1.0269	0.20837	4.92827	8.29606e-07	1.00892e-05	154.258	122.873	140.73	155.468	55.0138	62.4849	88.82	75.8943
788	ENSECAG00000037175	75.7003	1.09111	0.221501	4.92597	8.39432e-07	1.01957e-05	87.081	116.32	108.98	98.7561	44.1777	37.9007	58.4913	53.896
789	ENSECAG00000009472	45.4161	2.7804	0.564507	4.92536	8.42035e-07	1.02143e-05	26.1243	130.246	82.3784	78.2227	6.66834	27.6573	4.33269	7.69942
790	ENSECAG00000020131	5.95155	5.98573	1.21758	4.91609	8.82898e-07	1.06965e-05	23.6363	8.19156	6.00676	9.77783	0	0	0	0
792	ENSECAG00000031569	92.3746	1.33027	0.270758	4.91314	8.96294e-07	1.08314e-05	116.937	171.204	132.149	108.534	55.8473	75.8014	43.3269	35.1974
793	ENSECAG00000007818	63.8357	1.67117	0.340188	4.91251	8.99194e-07	1.08527e-05	49.7605	153.182	82.3784	102.667	27.5069	30.7303	28.1625	36.2973
797	ENSECAG00000020565	40.9519	-1.5776	0.321589	-4.90565	9.31164e-07	1.11821e-05	22.3922	15.564	24.027	20.5334	57.5144	81.9475	68.2398	37.3972
798	ENSECAG00000010280	5.66737	5.95859	1.21488	4.90467	9.35826e-07	1.1224e-05	3.73204	16.3831	15.446	9.77783	0	0	0	0
799	ENSECAG00000000346	13.3642	-2.65121	0.541061	-4.90002	9.58293e-07	1.14791e-05	7.46408	2.45747	1.71622	3.91113	31.6746	21.5112	20.5803	17.5987
801	ENSECAG00000008524	97.4195	-1.00111	0.204509	-4.89516	9.82253e-07	1.17368e-05	78.3729	63.075	53.2027	66.4893	145.87	134.189	105.068	133.09
802	ENSECAG00000010225	154.613	1.25869	0.25727	4.89249	9.95683e-07	1.18824e-05	145.55	188.406	226.541	310.935	73.3517	92.1909	87.7369	112.192
803	ENSECAG00000019018	47.9879	1.65805	0.339301	4.88666	1.0256e-06	1.22242e-05	54.7366	95.8413	70.3649	70.4004	20.8385	38.925	12.9981	19.7985
804	ENSECAG00000000759	29.8365	-1.6358	0.335064	-4.88207	1.0498e-06	1.24971e-05	14.9282	22.1172	12.0135	8.80005	51.6796	44.0468	44.41	40.6969
805	ENSECAG00000020652	73.6008	1.04877	0.214949	4.87915	1.06545e-06	1.26676e-05	98.2771	102.395	99.5406	95.8228	35.8423	52.2415	58.4913	46.1965
806	ENSECAG00000018119	46.4492	-1.28673	0.263835	-4.87703	1.07697e-06	1.27887e-05	18.6602	30.3088	32.6081	25.4224	69.184	63.5093	76.9052	54.9959
807	ENSECAG00000017910	136.291	-1.07136	0.21977	-4.87489	1.08867e-06	1.29116e-05	83.3489	62.2559	104.689	101.689	208.385	184.382	200.387	145.189
808	ENSECAG00000005844	9.78459	-4.74509	0.973564	-4.87394	1.09393e-06	1.2958e-05	0	0.819156	1.71622	0	14.1702	10.2434	23.8298	27.4979
810	ENSECAG00000018525	8.67223	-4.14603	0.852185	-4.86518	1.14352e-06	1.35082e-05	0	1.63831	1.71622	0	19.1715	18.4382	11.9149	16.4988
811	ENSECAG00000031152	43.1939	1.45402	0.298875	4.86499	1.14462e-06	1.35082e-05	52.2486	73.7241	55.7771	70.4004	15.0038	20.4869	24.9129	32.9975
813	ENSECAG00000032798	94.1076	-1.002	0.206239	-4.85842	1.18326e-06	1.39267e-05	74.6408	54.8835	52.3446	70.4004	133.367	142.384	112.65	112.192
814	ENSECAG00000033728	36.7159	-1.3947	0.28708	-4.85822	1.18445e-06	1.39267e-05	26.1243	14.7448	21.4527	19.5557	60.8486	44.0468	54.1586	52.796
815	ENSECAG00000007228	9.87633	3.5849	0.738869	4.85188	1.22298e-06	1.43621e-05	22.3922	20.4789	17.1622	12.7112	0.833542	0	4.33269	1.09992
817	ENSECAG00000022705	10.0902	4.26669	0.880543	4.84552	1.26282e-06	1.47937e-05	31.1003	9.82988	22.3108	13.689	1.66708	1.02434	0	1.09992
824	ENSECAG00000018370	24.8118	1.89011	0.391438	4.82862	1.37479e-06	1.59582e-05	32.3444	50.7877	34.3244	39.1113	13.3367	12.2921	12.9981	3.29975
825	ENSECAG00000039849	7.26954	-5.62537	1.16503	-4.82851	1.37556e-06	1.59582e-05	0	0	0.858109	0	21.6721	6.14606	14.0812	15.3988
827	ENSECAG00000000727	531.966	1.35926	0.281859	4.82248	1.41785e-06	1.6409e-05	488.897	974.796	902.73	694.226	170.043	371.837	294.623	358.573
828	ENSECAG00000000847	63.3498	1.71823	0.356348	4.82176	1.42296e-06	1.64483e-05	138.086	117.959	67.7906	65.5115	35.0088	41.9981	16.2476	24.1982
831	ENSECAG00000015330	51.4451	-1.21748	0.252549	-4.82078	1.42996e-06	1.64497e-05	22.3922	40.9578	30.0338	29.3335	78.3529	67.6067	77.9883	64.8951
832	ENSECAG00000018274	141.02	1.07587	0.223163	4.82102	1.42825e-06	1.64497e-05	179.138	177.757	235.122	172.09	75.8523	67.6067	102.901	117.691
833	ENSECAG00000007123	76.8886	1.01553	0.210682	4.8202	1.43417e-06	1.64783e-05	89.569	125.331	92.6758	103.645	54.1802	47.1198	51.9922	50.5962
834	ENSECAG00000007210	8.6955	-3.49283	0.72467	-4.81989	1.43635e-06	1.64836e-05	1.24401	1.63831	0.858109	1.95557	20.005	13.3165	16.2476	14.2989
835	ENSECAG00000000327	64.4094	1.13095	0.234667	4.81937	1.44016e-06	1.65075e-05	85.8369	94.203	90.1014	83.1116	35.0088	40.9737	55.2417	30.7977
836	ENSECAG00000017114	16.1856	2.31834	0.481719	4.81263	1.48959e-06	1.70536e-05	37.3204	27.8513	26.6014	16.6223	8.33542	5.12172	4.33269	3.29975
838	ENSECAG00000018193	74.0283	1.24532	0.259054	4.80717	1.53078e-06	1.7487e-05	98.2771	84.3731	131.291	101.689	28.3404	53.2659	45.4932	49.4963
839	ENSECAG00000002520	18.0086	-2.02093	0.420498	-4.80604	1.53952e-06	1.75623e-05	7.46408	5.73409	9.4392	5.8667	29.174	28.6816	37.911	19.7985
840	ENSECAG00000010930	14.4074	2.23654	0.465438	4.80524	1.54565e-06	1.76112e-05	29.8563	21.2981	21.4527	22.489	4.16771	6.14606	3.24951	6.59951
841	ENSECAG00000010628	16.6945	2.82615	0.588712	4.80056	1.58223e-06	1.80066e-05	53.4926	15.564	21.4527	26.4001	1.66708	4.09737	7.5822	3.29975
842	ENSECAG00000017701	19.5952	-2.84113	0.592086	-4.79851	1.59852e-06	1.81704e-05	0	3.27663	10.2973	4.88892	21.6721	20.4869	42.2437	53.896
843	ENSECAG00000003445	26.3077	-2.58669	0.539355	-4.79589	1.61952e-06	1.83872e-05	9.95211	5.73409	5.14865	9.77783	96.6909	30.7303	23.8298	28.5979
846	ENSECAG00000013048	32.6028	1.73995	0.363249	4.78997	1.6681e-06	1.88716e-05	31.1003	54.0643	54.919	60.6226	17.5044	17.4138	6.49903	18.6986
847	ENSECAG00000032956	6.93431	-5.54205	1.15879	-4.78264	1.73009e-06	1.95499e-05	1.24401	0	0	0	17.5044	6.14606	14.0812	16.4988
848	ENSECAG00000016106	52.5355	-1.25869	0.26331	-4.78028	1.75054e-06	1.97575e-05	19.9042	29.4896	34.3244	39.1113	65.0163	69.6553	71.4893	91.2932
849	ENSECAG00000023703	98.9285	-1.09129	0.228301	-4.78004	1.7526e-06	1.97575e-05	84.5929	46.6919	58.3514	64.5337	108.36	133.165	151.644	144.089
850	ENSECAG00000021146	138.826	-1.02027	0.213583	-4.77693	1.7799e-06	2.00417e-05	104.497	67.1708	108.98	87.0227	205.885	146.481	206.886	183.686
851	ENSECAG00000021331	8.68612	-4.52556	0.947996	-4.77382	1.80766e-06	2.03304e-05	1.24401	0.819156	0	0.977783	11.6696	13.3165	21.6634	19.7985
852	ENSECAG00000013952	20.2911	-2.5514	0.53489	-4.76995	1.84272e-06	2.07003e-05	4.97605	3.27663	10.2973	4.88892	22.5056	19.4625	62.8239	34.0974
853	ENSECAG00000010012	15.8037	-2.04769	0.429404	-4.76868	1.85441e-06	2.08072e-05	7.46408	8.19156	6.00676	2.93335	25.0063	26.6329	25.9961	24.1982
855	ENSECAG00000013485	189.002	-1.04744	0.219741	-4.76669	1.87275e-06	2.09639e-05	98.2771	169.565	109.838	114.401	316.746	241.745	246.963	214.484
856	ENSECAG00000006525	28.7567	1.41503	0.296976	4.76482	1.89025e-06	2.1135e-05	38.5644	41.777	42.9054	44.0002	15.8373	16.3895	14.0812	16.4988
857	ENSECAG00000000666	12.651	-2.7031	0.56746	-4.7635	1.90262e-06	2.12485e-05	4.97605	1.63831	4.29054	2.93335	29.174	11.2678	23.8298	23.0983
859	ENSECAG00000015424	45.6914	1.91639	0.402381	4.76263	1.91084e-06	2.12906e-05	28.6123	110.586	73.7974	75.2893	15.0038	17.4138	17.3307	27.4979
860	ENSECAG00000019894	219.605	1.29857	0.272676	4.76233	1.91367e-06	2.12973e-05	483.921	193.321	300.338	272.802	152.538	110.629	128.897	114.391
861	ENSECAG00000019631	79.6216	1.39751	0.293525	4.76112	1.92525e-06	2.14014e-05	69.6648	150.725	133.865	106.578	39.1765	38.925	61.7408	36.2973
862	ENSECAG00000007888	21.1611	2.10962	0.443157	4.76044	1.93173e-06	2.14485e-05	28.6123	54.8835	28.3176	25.4224	7.50188	9.21909	4.33269	10.9992
863	ENSECAG00000017783	51.3332	2.16575	0.455329	4.75646	1.97018e-06	2.185e-05	23.6363	144.172	73.7974	93.8672	16.6708	23.5599	15.1644	19.7985
864	ENSECAG00000024006	43.2205	-1.33363	0.280594	-4.75289	2.00533e-06	2.22141e-05	19.9042	29.4896	25.7433	22.489	63.3492	75.8014	64.9903	43.9967
865	ENSECAG00000018673	266.178	-1.07051	0.225271	-4.7521	2.01316e-06	2.22751e-05	230.143	141.714	181.919	134.934	455.114	279.646	368.278	337.675
866	ENSECAG00000010964	8.62275	-5.13431	1.08118	-4.7488	2.04625e-06	2.26151e-05	0	0	0.858109	0.977783	18.3379	21.5112	12.9981	14.2989
867	ENSECAG00000020187	68.039	1.05445	0.222115	4.7473	2.06154e-06	2.27578e-05	82.1049	107.309	90.1014	88.0005	49.179	50.1928	43.3269	34.0974
868	ENSECAG00000001597	6.46142	-5.44715	1.14838	-4.74332	2.10249e-06	2.31831e-05	0	0.819156	0	0	11.6696	18.4382	8.66537	12.0991
869	ENSECAG00000009093	116.912	-1.06854	0.225335	-4.742	2.11618e-06	2.33072e-05	93.301	81.9156	75.5136	51.8225	156.706	156.725	191.721	127.59
870	ENSECAG00000024510	28.0252	-1.52446	0.321543	-4.74106	2.12598e-06	2.33882e-05	18.6602	13.1065	13.7297	12.7112	32.5081	46.0955	38.9942	48.3964
871	ENSECAG00000022320	140.955	-1.2192	0.257244	-4.73948	2.14271e-06	2.35452e-05	125.645	63.075	80.6622	71.3782	214.22	212.039	223.133	137.49
872	ENSECAG00000008971	197.536	-1.31041	0.276593	-4.73767	2.16191e-06	2.37289e-05	74.6408	154.001	97.8244	126.134	230.058	204.869	296.789	395.97
873	ENSECAG00000007941	67.879	-1.28293	0.27081	-4.73737	2.16515e-06	2.37373e-05	26.1243	58.9793	32.6081	39.1113	90.8561	103.459	109.4	82.4938
875	ENSECAG00000017730	10.695	2.98023	0.629816	4.7319	2.22432e-06	2.43303e-05	18.6602	22.1172	17.1622	18.5779	5.83479	1.02434	1.08317	1.09992
876	ENSECAG00000021047	20.6217	2.35626	0.498028	4.73118	2.23221e-06	2.43887e-05	60.9567	25.3938	33.4662	18.5779	7.50188	8.19475	7.5822	3.29975
877	ENSECAG00000023765	29.7987	-1.76111	0.372402	-4.72904	2.25583e-06	2.45917e-05	6.22007	11.4682	16.3041	19.5557	37.5094	34.8277	50.9091	61.5954
878	ENSECAG00000037942	44.4615	1.72105	0.363933	4.72903	2.25593e-06	2.45917e-05	27.3683	78.639	83.2366	83.1116	19.1715	20.4869	20.5803	23.0983
880	ENSECAG00000019242	192.457	1.19347	0.252605	4.72467	2.30491e-06	2.50686e-05	251.291	196.598	338.953	283.557	90.8561	95.2639	112.65	170.487
881	ENSECAG00000006289	285.071	1.07567	0.22774	4.72325	2.3211e-06	2.51588e-05	451.577	277.694	455.656	361.78	172.543	131.116	204.719	225.483
882	ENSECAG00000017527	143.344	-1.69131	0.358077	-4.72331	2.32034e-06	2.51588e-05	51.0046	131.065	41.1892	46.9336	223.389	292.962	178.723	181.486
883	ENSECAG00000019399	135.373	-1.01628	0.215146	-4.72368	2.31616e-06	2.51588e-05	119.425	67.1708	86.669	87.0227	205.051	147.505	176.557	193.585
884	ENSECAG00000024860	13.0564	2.82813	0.599006	4.72137	2.34265e-06	2.53636e-05	18.6602	12.2873	27.4595	33.2446	4.16771	2.04869	1.08317	5.49959
885	ENSECAG00000013484	10.4398	2.8773	0.60953	4.72052	2.35244e-06	2.54409e-05	17.4162	13.1065	21.4527	21.5112	2.50063	2.04869	1.08317	4.39967
889	ENSECAG00000012328	18.8846	1.89138	0.401393	4.71204	2.45252e-06	2.64039e-05	23.6363	27.0322	38.6149	29.3335	5.83479	10.2434	7.5822	8.79934
891	ENSECAG00000022057	56.4494	-2.18867	0.464865	-4.70819	2.49921e-06	2.68462e-05	33.5884	3.27663	25.7433	19.5557	80.8536	60.4363	112.65	115.491
893	ENSECAG00000017689	65.0977	1.83184	0.389283	4.70567	2.53034e-06	2.70894e-05	51.0046	86.8306	127	140.801	14.1702	26.6329	29.2456	45.0966
895	ENSECAG00000000497	142.796	1.04455	0.22204	4.70433	2.54703e-06	2.72375e-05	153.014	244.109	172.48	198.49	75.8523	89.1179	121.315	87.9934
896	ENSECAG00000013791	29.3458	-1.48659	0.316051	-4.70363	2.55572e-06	2.72782e-05	14.9282	14.7448	13.7297	18.5779	47.5119	53.2659	37.911	34.0974
897	ENSECAG00000035431	66.8259	1.20479	0.256144	4.70357	2.55653e-06	2.72782e-05	110.717	90.9263	79.8041	90.9338	30.0075	32.779	42.2437	57.1957
898	ENSECAG00000007800	46.4946	1.17217	0.249253	4.70273	2.56703e-06	2.73598e-05	62.2007	67.1708	60.9257	67.467	30.8411	25.6086	35.7447	21.9984
899	ENSECAG00000000683	10.544	2.73942	0.583194	4.69727	2.63668e-06	2.80535e-05	13.6841	22.1172	19.7365	17.6001	1.66708	4.09737	3.24951	2.19984
900	ENSECAG00000022603	25.6106	1.66413	0.354285	4.69716	2.63799e-06	2.80535e-05	46.0285	35.2237	32.6081	42.0447	13.3367	6.14606	12.9981	16.4988
902	ENSECAG00000010053	10.2526	4.27824	0.911411	4.69409	2.67799e-06	2.84158e-05	4.97605	29.4896	18.8784	24.4446	0	2.04869	1.08317	1.09992
903	ENSECAG00000006474	334.572	-3.03369	0.646371	-4.69342	2.68678e-06	2.84775e-05	149.282	63.8942	36.8987	42.0447	1189.46	265.305	552.417	377.272
904	ENSECAG00000019351	41.2394	1.79279	0.382107	4.69185	2.70751e-06	2.86655e-05	26.1243	91.7455	62.6419	75.2893	20.8385	19.4625	18.4139	15.3988
908	ENSECAG00000005306	24.2919	1.56131	0.3334	4.68299	2.82716e-06	2.98004e-05	34.8324	37.6812	36.8987	36.178	16.6708	10.2434	10.8317	10.9992
909	ENSECAG00000000511	291.664	1.28922	0.275551	4.6787	2.88701e-06	3.03978e-05	221.434	503.781	359.548	570.048	144.203	160.822	174.391	199.085
912	ENSECAG00000030463	16.5648	-1.8893	0.404169	-4.67452	2.94638e-06	3.09209e-05	6.22007	9.01072	7.72298	4.88892	26.6733	25.6086	25.9961	26.398
915	ENSECAG00000027749	15.4425	2.49968	0.535022	4.67211	2.98122e-06	3.11839e-05	19.9042	45.0536	20.5946	19.5557	6.66834	4.09737	2.16634	5.49959
916	ENSECAG00000015807	4.91325	-5.81227	1.24492	-4.66878	3.02987e-06	3.16582e-05	0	0	0	0	19.1715	9.21909	5.41586	5.49959
918	ENSECAG00000013770	17.6062	1.8912	0.405662	4.662	3.13149e-06	3.26487e-05	21.1482	34.4046	25.7433	29.3335	6.66834	7.1704	7.5822	8.79934
919	ENSECAG00000022776	6.22892	-5.38223	1.15553	-4.65778	3.19638e-06	3.3289e-05	1.24401	0	0	0	14.1702	7.1704	16.2476	10.9992
920	ENSECAG00000009125	8.68834	-5.14144	1.10527	-4.65173	3.29161e-06	3.42435e-05	1.24401	0.819156	0	0	16.6708	25.6086	8.66537	16.4988
921	ENSECAG00000015181	10.2324	-2.94997	0.634414	-4.64991	3.32088e-06	3.45104e-05	0	0.819156	4.29054	3.91113	15.0038	16.3895	22.7466	18.6986
923	ENSECAG00000009550	35.104	1.59947	0.344316	4.64536	3.39486e-06	3.52028e-05	55.9806	52.426	42.9054	59.6448	12.5031	25.6086	8.66537	23.0983
924	ENSECAG00000024404	54.2069	-1.28664	0.277042	-4.64421	3.41388e-06	3.53617e-05	29.8563	21.2981	46.3379	28.3557	74.1852	65.558	85.5705	82.4938
925	ENSECAG00000036783	8.72741	-5.16434	1.11236	-4.64269	3.43894e-06	3.55828e-05	0	0	1.71622	0	24.1727	11.2678	21.6634	10.9992
926	ENSECAG00000010521	17.1449	1.94765	0.419668	4.64093	3.4684e-06	3.58489e-05	28.6123	28.6705	24.027	27.3779	5.83479	5.12172	5.41586	12.0991
927	ENSECAG00000014813	13.5092	4.69063	1.01084	4.64032	3.47874e-06	3.59169e-05	3.73204	57.3409	22.3108	20.5334	0	3.07303	1.08317	0
928	ENSECAG00000029043	52.6841	1.36701	0.294746	4.63795	3.51888e-06	3.62922e-05	92.057	80.2773	65.2163	65.5115	16.6708	28.6816	41.1605	31.8976
929	ENSECAG00000019219	18.4996	1.80371	0.389109	4.63548	3.56109e-06	3.66881e-05	36.0764	26.213	25.7433	27.3779	9.16896	9.21909	6.49903	7.69942
930	ENSECAG00000003563	7.94231	-4.01776	0.867133	-4.63338	3.59741e-06	3.70224e-05	0	2.45747	0.858109	0	16.6708	18.4382	11.9149	13.199
931	ENSECAG00000009739	8.53097	-4.11023	0.887309	-4.63224	3.61729e-06	3.7187e-05	0	0	3.43244	0	13.3367	13.3165	21.6634	16.4988
932	ENSECAG00000024679	67.5722	1.03339	0.223179	4.63032	3.65098e-06	3.7493e-05	82.1049	107.309	84.0947	89.9561	54.1802	38.925	44.41	39.597
933	ENSECAG00000011528	36.5852	-1.9339	0.41812	-4.62523	3.7419e-06	3.83856e-05	12.4401	23.7555	11.1554	12.7112	29.174	46.0955	67.1566	90.1932
934	ENSECAG00000007018	20.8855	-1.90971	0.413002	-4.62398	3.76439e-06	3.8575e-05	11.1961	11.4682	6.00676	6.84448	47.5119	32.779	27.0793	24.1982
935	ENSECAG00000023573	14.1862	2.30098	0.497657	4.62362	3.77105e-06	3.86019e-05	26.1243	14.7448	30.8919	22.489	4.16771	3.07303	6.49903	5.49959
936	ENSECAG00000016210	23.3594	2.02841	0.438786	4.62278	3.78625e-06	3.8716e-05	39.8084	16.3831	47.196	46.9336	10.836	7.1704	9.74854	8.79934
938	ENSECAG00000009349	72.1198	-1.01512	0.219796	-4.61844	3.8664e-06	3.94513e-05	34.8324	51.6068	52.3446	50.8447	92.5232	81.9475	105.068	107.792
939	ENSECAG00000014680	80.1206	-1.14351	0.247619	-4.61802	3.87416e-06	3.94884e-05	68.4207	37.6812	54.919	40.0891	121.697	89.1179	125.648	103.392
941	ENSECAG00000006607	51.5598	2.46435	0.535836	4.59908	4.24358e-06	4.31619e-05	21.1482	152.363	72.9393	102.667	15.8373	25.6086	5.41586	16.4988
942	ENSECAG00000015595	96.5802	-1.04692	0.22776	-4.5966	4.29446e-06	4.36165e-05	78.3729	49.1494	66.0744	59.6448	145.036	97.3126	150.561	126.491
943	ENSECAG00000021411	9.86819	-2.72983	0.593899	-4.59646	4.29739e-06	4.36165e-05	2.48803	3.27663	3.43244	0.977783	16.6708	20.4869	18.4139	13.199
944	ENSECAG00000011545	54.4774	1.06854	0.232566	4.59456	4.33672e-06	4.3947e-05	68.4207	70.4474	76.3717	80.1782	38.3429	41.9981	28.1625	31.8976
945	ENSECAG00000035885	23.9948	-1.74463	0.379726	-4.59444	4.33914e-06	4.3947e-05	14.9282	9.01072	13.7297	6.84448	35.0088	48.1441	38.9942	25.2981
946	ENSECAG00000023985	26.7508	-1.75931	0.383078	-4.59258	4.37808e-06	4.42945e-05	9.95211	9.82988	17.1622	11.7334	50.0125	54.2902	36.8278	24.1982
948	ENSECAG00000021570	15.8821	1.94983	0.425453	4.58294	4.58485e-06	4.62886e-05	24.8803	27.0322	21.4527	27.3779	5.83479	4.09737	7.5822	8.79934
949	ENSECAG00000015324	44.1922	1.35151	0.294951	4.58216	4.60193e-06	4.64121e-05	92.057	58.1601	55.7771	48.8892	29.174	22.5356	22.7466	24.1982
950	ENSECAG00000016778	8.81318	3.21366	0.70155	4.5808	4.63196e-06	4.66658e-05	12.4401	22.9364	13.7297	14.6667	2.50063	2.04869	1.08317	1.09992
951	ENSECAG00000018687	18.9232	2.19312	0.478955	4.57898	4.67251e-06	4.70248e-05	53.4926	21.2981	21.4527	28.3557	6.66834	9.21909	6.49903	4.39967
953	ENSECAG00000020463	4788.37	-1.13888	0.249052	-4.57288	4.81073e-06	4.83142e-05	1900.85	3577.26	3504.52	2978.33	5054.6	5040.79	8081.54	8169.09
954	ENSECAG00000011190	116.614	-1.20004	0.262475	-4.57202	4.8304e-06	4.84609e-05	67.1767	58.1601	93.5339	63.5559	141.702	124.97	146.228	237.582
955	ENSECAG00000034282	28.5797	3.31117	0.724418	4.57081	4.85849e-06	4.86918e-05	9.95211	14.7448	118.419	64.5337	5.00125	5.12172	8.66537	2.19984
956	ENSECAG00000013574	8.30902	-3.6841	0.806187	-4.56979	4.88223e-06	4.88785e-05	2.48803	0.819156	0.858109	0.977783	25.0063	12.2921	10.8317	13.199
959	ENSECAG00000021525	443.508	1.34069	0.293815	4.56305	5.04155e-06	5.03156e-05	436.649	462.004	916.46	727.471	173.377	202.82	276.209	353.074
960	ENSECAG00000011661	47.5541	1.97326	0.432785	4.55944	5.129e-06	5.11351e-05	41.0524	136.799	55.7771	69.4226	18.3379	30.7303	18.4139	9.89926
961	ENSECAG00000010869	5.14309	-5.87535	1.28928	-4.55707	5.18723e-06	5.16618e-05	0	0	0	0	19.1715	14.3408	4.33269	3.29975
962	ENSECAG00000015395	4.06901	-5.51717	1.21078	-4.55671	5.19615e-06	5.16969e-05	0	0	0	0	5.83479	9.21909	6.49903	10.9992
963	ENSECAG00000016553	96.2937	-1.02692	0.225433	-4.55532	5.2306e-06	5.19855e-05	52.2486	68.8091	65.2163	66.4893	135.867	89.1179	140.812	151.789
965	ENSECAG00000034818	21.848	-2.1487	0.472919	-4.54347	5.53348e-06	5.48818e-05	13.6841	9.82988	3.43244	5.8667	35.0088	47.1198	42.2437	17.5987
966	ENSECAG00000020814	49.7177	-1.14001	0.250948	-4.54283	5.55031e-06	5.49917e-05	28.6123	28.6705	31.75	35.2002	71.6846	85.0205	57.4081	59.3955
967	ENSECAG00000038552	11.8783	2.42995	0.534968	4.54224	5.56608e-06	5.5091e-05	12.4401	24.5747	21.4527	21.5112	3.33417	4.09737	5.41586	2.19984
969	ENSECAG00000004031	5.45019	5.89691	1.29952	4.53776	5.68545e-06	5.61563e-05	2.48803	21.2981	5.14865	14.6667	0	0	0	0
972	ENSECAG00000015029	22.0144	2.76964	0.611167	4.53173	5.85039e-06	5.7607e-05	33.5884	84.3731	17.1622	18.5779	7.50188	6.14606	2.16634	6.59951
973	ENSECAG00000014287	8.65822	4.05801	0.895562	4.53125	5.86363e-06	5.76782e-05	24.8803	13.1065	18.8784	8.80005	2.50063	0	0	1.09992
974	ENSECAG00000011043	28.1818	1.38447	0.305686	4.52907	5.92446e-06	5.82166e-05	42.2965	38.5003	46.3379	36.178	18.3379	14.3408	15.1644	14.2989
976	ENSECAG00000020387	95.6661	-1.11032	0.245295	-4.52649	5.99712e-06	5.88255e-05	65.9327	59.7984	55.7771	61.6003	160.874	164.919	100.735	95.6928
977	ENSECAG00000036440	9.19567	-2.88763	0.638417	-4.52311	6.09379e-06	5.96967e-05	3.73204	1.63831	0.858109	2.93335	13.3367	20.4869	14.0812	16.4988
978	ENSECAG00000019162	15.1396	2.52829	0.559185	4.52139	6.14348e-06	6.0122e-05	21.1482	37.6812	11.1554	33.2446	4.16771	7.1704	3.24951	3.29975
980	ENSECAG00000018830	8.45899	-3.45043	0.764182	-4.5152	6.32576e-06	6.17794e-05	0	0.819156	1.71622	2.93335	10.0025	18.4382	21.6634	12.0991
981	ENSECAG00000010257	40.1661	-1.23392	0.273314	-4.51465	6.34209e-06	6.18758e-05	21.1482	17.2023	30.0338	27.3779	56.6809	53.2659	62.8239	52.796
983	ENSECAG00000015806	54.744	3.8647	0.856987	4.50964	6.4937e-06	6.32207e-05	18.6602	213.8	67.7906	109.512	4.16771	16.3895	4.33269	3.29975
984	ENSECAG00000019069	331.124	1.16927	0.259295	4.50944	6.49975e-06	6.32207e-05	674.255	432.515	399.021	328.535	179.212	273.5	207.969	153.988
985	ENSECAG00000002186	13.4865	-2.21573	0.491441	-4.50864	6.52459e-06	6.33689e-05	3.73204	3.27663	5.14865	6.84448	14.1702	25.6086	24.9129	24.1982
987	ENSECAG00000013822	7.98052	-5.02775	1.11529	-4.508	6.54408e-06	6.34584e-05	0	0.819156	0.858109	0	15.0038	11.2678	25.9961	9.89926
988	ENSECAG00000029514	24.9699	-1.53585	0.34076	-4.50713	6.5711e-06	6.36559e-05	11.1961	11.4682	12.8716	15.6445	35.0088	48.1441	36.8278	28.5979
989	ENSECAG00000019837	203.018	1.32833	0.294782	4.50614	6.60184e-06	6.3889e-05	362.008	167.927	363.838	268.89	164.208	77.8501	107.234	112.192
990	ENSECAG00000008879	20.8076	1.75401	0.389472	4.50356	6.68231e-06	6.46024e-05	39.8084	36.0429	21.4527	31.2891	9.16896	11.2678	10.8317	6.59951
991	ENSECAG00000023776	12.3729	3.73543	0.829505	4.50321	6.69347e-06	6.4645e-05	3.73204	40.9578	18.0203	29.3335	1.66708	3.07303	0	2.19984
992	ENSECAG00000011277	25.9363	-1.61946	0.360044	-4.49795	6.86123e-06	6.61984e-05	14.9282	13.9257	8.58109	13.689	27.5069	47.1198	48.7427	32.9975
994	ENSECAG00000016503	7.4527	-4.32402	0.96161	-4.49665	6.90336e-06	6.64709e-05	0	0	0.858109	1.95557	17.5044	16.3895	11.9149	10.9992
995	ENSECAG00000033017	71.7638	-1.12679	0.250632	-4.49579	6.93113e-06	6.66712e-05	41.0524	37.6812	54.0609	46.9336	76.6859	80.9231	123.482	113.292
996	ENSECAG00000018918	11.8754	2.95749	0.657883	4.49546	6.94181e-06	6.67069e-05	12.4401	24.5747	18.8784	28.3557	2.50063	7.1704	1.08317	0
997	ENSECAG00000016610	23.7168	-1.4878	0.331512	-4.48792	7.19213e-06	6.9043e-05	9.95211	13.1065	14.5879	11.7334	33.3417	31.7546	41.1605	34.0974
998	ENSECAG00000000066	756.271	1.02949	0.22956	4.48463	7.30396e-06	7.00463e-05	797.413	1149.28	1003.99	1108.81	340.919	647.385	404.023	598.355
999	ENSECAG00000019952	41.6702	1.16688	0.260442	4.48038	7.45094e-06	7.13844e-05	53.4926	51.6068	68.6487	56.7114	25.8398	22.5356	30.3288	24.1982
1001	ENSECAG00000013115	21.3057	1.6051	0.358507	4.47717	7.56403e-06	7.23697e-05	33.5884	33.5854	24.8852	36.178	9.16896	12.2921	9.74854	10.9992
1002	ENSECAG00000016754	30.9851	-1.36635	0.305283	-4.4757	7.61627e-06	7.27498e-05	19.9042	16.3831	20.5946	12.7112	54.1802	37.9007	44.41	41.7969
1003	ENSECAG00000012384	19.3073	1.90912	0.426751	4.47361	7.69097e-06	7.33901e-05	19.9042	31.9471	35.1825	34.2224	4.16771	7.1704	8.66537	13.199
1006	ENSECAG00000018794	16.6083	1.8992	0.424811	4.4707	7.79634e-06	7.41737e-05	28.6123	24.5747	22.3108	29.3335	5.83479	11.2678	4.33269	6.59951
1007	ENSECAG00000008203	10.1084	-2.94116	0.659194	-4.46175	8.12938e-06	7.72654e-05	2.48803	5.73409	0.858109	0	17.5044	20.4869	19.4971	14.2989
1008	ENSECAG00000018055	9.55621	-3.05824	0.685598	-4.46069	8.16961e-06	7.75708e-05	0	5.73409	0.858109	0.977783	16.6708	19.4625	16.2476	16.4988
1009	ENSECAG00000021560	16.8167	-1.8479	0.414376	-4.45949	8.21554e-06	7.79296e-05	4.97605	5.73409	7.72298	10.7556	31.6746	25.6086	21.6634	26.398
1010	ENSECAG00000019865	39.5217	-1.4234	0.319485	-4.4553	8.37741e-06	7.93863e-05	24.8803	18.0214	14.5879	29.3335	74.1852	63.5093	47.6595	43.9967
1011	ENSECAG00000024997	9.17003	2.81028	0.630815	4.45499	8.38968e-06	7.94239e-05	17.4162	16.3831	15.446	14.6667	0.833542	2.04869	2.16634	4.39967
1012	ENSECAG00000014972	23.442	1.70723	0.383318	4.45382	8.43565e-06	7.97802e-05	44.7845	36.0429	27.4595	36.178	17.5044	9.21909	9.74854	6.59951
1014	ENSECAG00000020196	12.9115	2.17126	0.487865	4.45053	8.56587e-06	8.0852e-05	18.6602	26.213	16.3041	23.4668	5.83479	4.09737	5.41586	3.29975
1015	ENSECAG00000020599	65.0357	1.69993	0.382129	4.44857	8.64432e-06	8.15121e-05	160.478	104.033	90.1014	44.0002	40.01	35.852	24.9129	20.8984
1017	ENSECAG00000016199	64.7523	1.01948	0.229235	4.44731	8.69507e-06	8.18294e-05	98.2771	71.2666	79.8041	97.7783	36.6758	50.1928	43.3269	40.6969
1018	ENSECAG00000019725	10.4504	-3.40418	0.765837	-4.44504	8.78743e-06	8.26174e-05	0	5.73409	0.858109	0	15.0038	21.5112	12.9981	27.4979
1019	ENSECAG00000022257	5.32927	-5.15452	1.1601	-4.44317	8.86442e-06	8.32595e-05	0	0	0.858109	0	7.50188	10.2434	10.8317	13.199
1022	ENSECAG00000017930	24.7462	1.80783	0.407194	4.43972	9.00775e-06	8.43573e-05	46.0285	22.9364	48.0541	37.1558	11.6696	8.19475	17.3307	6.59951
1025	ENSECAG00000014429	98.0995	1.04188	0.235005	4.43346	9.27312e-06	8.65883e-05	104.497	163.831	108.98	150.579	62.5156	80.9231	59.5744	53.896
1026	ENSECAG00000003783	40.0595	-1.63049	0.368147	-4.42891	9.47115e-06	8.83513e-05	32.3444	13.1065	15.446	18.5779	51.6796	93.2152	44.41	51.6961
1028	ENSECAG00000024043	126.616	-4.09614	0.926167	-4.42267	9.74865e-06	9.0763e-05	41.0524	3.27663	9.4392	2.93335	435.109	96.2883	267.543	157.288
1029	ENSECAG00000027680	37.9847	-1.74001	0.393791	-4.41861	9.93397e-06	9.23984e-05	18.6602	15.564	17.1622	18.5779	38.3429	29.706	85.5705	80.294
1030	ENSECAG00000014328	5.73827	-5.26131	1.19157	-4.41545	1.008e-05	9.36659e-05	0	0	0	0.977783	5.83479	19.4625	10.8317	8.79934
1031	ENSECAG00000017346	8.25266	-2.94572	0.668099	-4.4091	1.03799e-05	9.63593e-05	2.48803	2.45747	1.71622	0.977783	15.8373	17.4138	10.8317	14.2989
1032	ENSECAG00000023732	847.502	1.36322	0.30927	4.40787	1.04391e-05	9.68147e-05	537.414	1850.47	1111.25	1382.59	487.622	571.584	436.518	402.57
1033	ENSECAG00000002357	45.7473	1.2994	0.295286	4.40049	1.08006e-05	0.00010007	49.7605	69.6283	75.5136	64.5337	18.3379	34.8277	33.5783	19.7985
1034	ENSECAG00000016019	3.59939	-5.34898	1.21591	-4.39915	1.08678e-05	0.000100595	0	0	0	0	7.50188	8.19475	6.49903	6.59951
1035	ENSECAG00000009617	34.6136	1.57815	0.359064	4.39517	1.10687e-05	0.000102356	27.3683	54.8835	58.3514	66.4893	18.3379	15.3652	11.9149	24.1982
1036	ENSECAG00000012583	32.2184	-1.91334	0.43561	-4.39234	1.12138e-05	0.000103597	27.3683	7.37241	12.8716	7.82227	64.1827	54.2902	55.2417	28.5979
1037	ENSECAG00000012388	14.472	2.14021	0.48743	4.3908	1.12934e-05	0.000104143	27.3683	29.4896	21.4527	15.6445	2.50063	5.12172	6.49903	7.69942
1038	ENSECAG00000019625	15.0597	2.06384	0.470039	4.39078	1.12946e-05	0.000104143	23.6363	28.6705	16.3041	28.3557	3.33417	8.19475	7.5822	4.39967
1039	ENSECAG00000000303	16.6876	2.40522	0.548201	4.38748	1.14671e-05	0.000105632	54.7366	22.9364	16.3041	18.5779	5.00125	6.14606	6.49903	3.29975
1040	ENSECAG00000014015	22.4519	1.49084	0.339867	4.38653	1.15173e-05	0.000105992	36.0764	32.7663	35.1825	28.3557	10.836	11.2678	10.8317	14.2989
1041	ENSECAG00000011462	60.3615	1.58106	0.360656	4.38384	1.16606e-05	0.000107208	59.7127	75.3624	126.142	99.7339	18.3379	19.4625	35.7447	48.3964
1042	ENSECAG00000023878	57.7086	-1.00901	0.230203	-4.38314	1.16979e-05	0.000107448	27.3683	36.862	40.3311	47.9114	78.3529	74.7771	79.0715	76.9942
1044	ENSECAG00000015959	32.0961	1.56316	0.357581	4.3715	1.23397e-05	0.000113126	42.2965	63.075	48.0541	38.1335	13.3367	25.6086	8.66537	17.5987
1045	ENSECAG00000029436	3.73784	-5.39024	1.23337	-4.37032	1.24065e-05	0.00011363	0	0	0	0	4.16771	7.1704	8.66537	9.89926
1046	ENSECAG00000024965	18.3016	1.83424	0.420137	4.36581	1.26651e-05	0.000115887	32.3444	33.5854	24.8852	23.4668	8.33542	4.09737	6.49903	13.199
1047	ENSECAG00000004152	27.8473	2.04283	0.468124	4.36386	1.27785e-05	0.000116702	17.4162	77.0007	41.1892	43.0225	6.66834	11.2678	11.9149	14.2989
1048	ENSECAG00000015951	14.5683	-1.96211	0.449608	-4.36405	1.27678e-05	0.000116702	4.97605	4.91494	5.14865	8.80005	25.0063	16.3895	24.9129	26.398
1049	ENSECAG00000042372	93.9307	1.66277	0.381145	4.36256	1.28548e-05	0.000117287	85.8369	234.279	120.135	130.045	23.3392	71.704	50.9091	35.1974
1050	ENSECAG00000005198	31.0418	-1.35229	0.310109	-4.36068	1.29657e-05	0.000118185	19.9042	18.0214	12.0135	20.5334	49.179	52.2415	35.7447	40.6969
1051	ENSECAG00000015275	196.529	-1.94444	0.446772	-4.3522	1.34779e-05	0.00012262	37.3204	29.4896	150.169	106.578	205.051	241.745	424.603	377.272
1052	ENSECAG00000020277	3.68249	-5.37405	1.23478	-4.35223	1.34758e-05	0.00012262	0	0	0	0	5.00125	10.2434	5.41586	8.79934
1053	ENSECAG00000025090	13.8178	2.18334	0.501964	4.3496	1.36388e-05	0.000123966	33.5884	21.2981	14.5879	21.5112	6.66834	3.07303	5.41586	4.39967
1054	ENSECAG00000016499	50.8971	-1.33015	0.306128	-4.34507	1.39229e-05	0.000126429	38.5644	27.8513	17.1622	33.2446	63.3492	98.337	72.5725	56.0958
1058	ENSECAG00000017741	56.6585	1.45304	0.335482	4.33119	1.48305e-05	0.000134161	85.8369	128.608	48.9122	68.4448	25.8398	39.9494	27.0793	28.5979
1059	ENSECAG00000021619	18.6013	2.03184	0.469351	4.32904	1.49763e-05	0.000135353	18.6602	25.3938	43.7636	31.2891	5.00125	7.1704	4.33269	13.199
1061	ENSECAG00000012173	60.1871	1.26322	0.291905	4.32752	1.50798e-05	0.000136031	124.401	89.288	64.3582	62.5781	38.3429	35.852	27.0793	39.597
1062	ENSECAG00000016276	81.0139	1.01177	0.234072	4.32246	1.543e-05	0.000139059	83.3489	139.257	103.831	105.601	45.8448	52.2415	51.9922	65.9951
1065	ENSECAG00000010033	28.2669	-1.42595	0.330103	-4.31971	1.56237e-05	0.000140408	21.1482	15.564	14.5879	10.7556	50.8461	38.925	31.412	42.8968
1068	ENSECAG00000011290	12.2656	-2.23819	0.518591	-4.31591	1.58945e-05	0.000142441	2.48803	2.45747	4.29054	7.82227	15.0038	24.5842	20.5803	20.8984
1069	ENSECAG00000017504	79.563	1.30492	0.302517	4.31356	1.60648e-05	0.000143831	169.186	85.1923	99.5406	100.712	66.6834	39.9494	42.2437	32.9975
1070	ENSECAG00000001495	30.1304	1.34438	0.311841	4.31112	1.62426e-05	0.000145288	29.8563	48.3302	43.7636	50.8447	19.1715	17.4138	15.1644	16.4988
1071	ENSECAG00000014728	8.11127	3.92534	0.910598	4.31073	1.62718e-05	0.000145321	6.22007	15.564	22.3108	16.6223	0	3.07303	0	1.09992
1072	ENSECAG00000022979	135.598	-1.02774	0.238418	-4.31066	1.62767e-05	0.000145321	63.4447	91.7455	120.993	79.2004	174.21	138.286	211.218	205.685
1073	ENSECAG00000009357	28.7551	-1.48473	0.344449	-4.31044	1.62926e-05	0.000145328	21.1482	13.1065	16.3041	10.7556	55.0138	29.706	44.41	39.597
1075	ENSECAG00000012171	45.2102	1.29304	0.300152	4.30795	1.64773e-05	0.000146701	82.1049	48.3302	48.9122	78.2227	29.174	23.5599	20.5803	30.7977
1076	ENSECAG00000016154	4.83798	-5.02197	1.16596	-4.30717	1.65353e-05	0.000147082	0	0.819156	0	0	9.16896	11.2678	9.74854	7.69942
1077	ENSECAG00000012612	43.0642	1.5055	0.349683	4.30531	1.66749e-05	0.000148185	33.5884	73.7241	82.3784	64.5337	19.1715	31.7546	15.1644	24.1982
1078	ENSECAG00000008681	3.58386	-5.33161	1.23881	-4.3038	1.67892e-05	0.000149063	0	0	0	0	5.00125	5.12172	9.74854	8.79934
1080	ENSECAG00000030611	9.14673	-2.77106	0.64436	-4.30048	1.70431e-05	0.000151036	1.24401	3.27663	1.71622	2.93335	17.5044	22.5356	15.1644	8.79934
1081	ENSECAG00000031458	3.5117	-5.30981	1.23582	-4.29658	1.73454e-05	0.000153574	0	0	0	0	5.83479	10.2434	5.41586	6.59951
1084	ENSECAG00000024998	42.0416	-1.14132	0.266007	-4.29056	1.78223e-05	0.000157359	19.9042	27.0322	29.1757	28.3557	69.184	48.1441	61.7408	52.796
1085	ENSECAG00000024049	24.513	1.57767	0.367744	4.29013	1.78565e-05	0.000157516	48.5165	25.3938	42.9054	30.3113	12.5031	10.2434	10.8317	15.3988
1086	ENSECAG00000027690	11.7501	-2.1783	0.507881	-4.289	1.79477e-05	0.000158175	3.73204	4.91494	5.14865	2.93335	15.0038	16.3895	20.5803	25.2981
1087	ENSECAG00000001418	3.67525	-5.38318	1.25607	-4.28575	1.82126e-05	0.000160361	0	0	0	0	8.33542	11.2678	6.49903	3.29975
1089	ENSECAG00000014953	20.366	2.54715	0.594547	4.28419	1.83407e-05	0.000161045	7.46408	65.5325	24.8852	41.0669	5.83479	6.14606	6.49903	5.49959
1090	ENSECAG00000017802	510.24	3.05077	0.712078	4.28432	1.83299e-05	0.000161045	1397.03	239.194	1226.24	780.271	201.717	32.779	135.396	69.2948
1091	ENSECAG00000022275	106.972	1.01042	0.235874	4.28372	1.83791e-05	0.000161234	169.186	172.023	120.135	111.467	84.1877	80.9231	60.6576	57.1957
1093	ENSECAG00000018333	125.657	-1.56149	0.364723	-4.28131	1.858e-05	0.000162698	62.2007	105.671	32.6081	53.7781	225.056	269.402	125.648	130.89
1095	ENSECAG00000037793	179.466	1.00882	0.235818	4.27797	1.88602e-05	0.000164851	236.363	306.364	205.946	211.201	149.204	143.408	99.6518	83.5937
1096	ENSECAG00000003600	41.6989	-1.35061	0.315889	-4.27558	1.90637e-05	0.000166466	36.0764	16.3831	23.1689	19.5557	57.5144	67.6067	71.4893	41.7969
[truncated: 1,014 more rows]

## Sheet: Table S3
Table S3. Results of the identification of DEGs between group II vs III using DeSeq 2 software.								Group II (5-AZA-dc+TSA)				Group III (Control)
[truncated: 1,886 more rows]

[truncated: 7 more sheets: Table S4, Table S5, Table S6, Table S7, Table S8, Table S9, Table S10]
